# Supplementary material for: The genetic and dietary landscape of the muscle insulin signalling network
Source: eLife journal article supplement (doi:10.7554/elife.89212), 2023-09-12

F01\_Pfkfb3

Pfkfb3

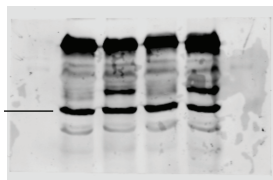

F02\_tubulin

 $\alpha$ -tubulin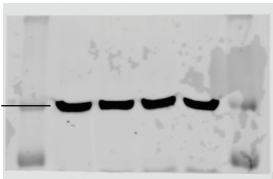**b**

Pfkfb3 OE    -    +    -    +  
 Palmitate   -   -    +    +

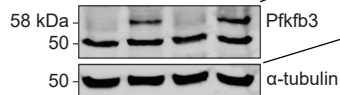

F1\_pGsk3

pS21/S9  
 GSK3 $\alpha/\beta$

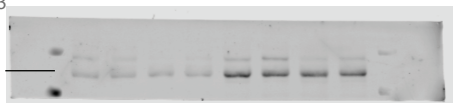

F2\_pPRAS40

pT246  
 PRAS40

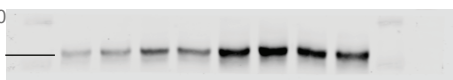

F3\_tPRAS40

PRAS40

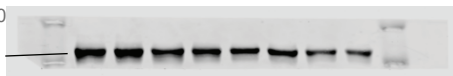

F4\_pS473Akt

pS473 Akt

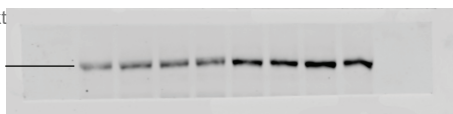

F5\_pT308Akt

pT308 Akt

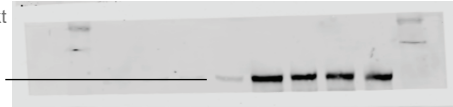

F6\_tAkt

Akt

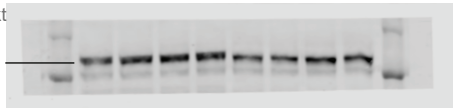

F7\_1433

14-3-3

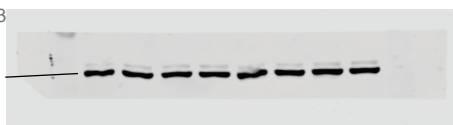

F8\_PFKFB3

atubulin

PFKFB3  
 $\alpha$ -tubulin

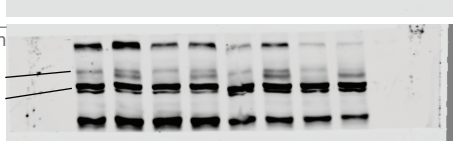**f**

| Pfkfb3 OE<br>Palmitate | Basal |   |   |   | Insulin |   |   |   |
|------------------------|-------|---|---|---|---------|---|---|---|
|                        | -     | + | - | + | -       | + | - | + |
| -                      | -     | - | + | + | -       | - | + | + |

pS21/S9 GSK3 $\alpha/\beta$ 

pT246 PRAS40

PRAS40

pS473 Akt

pT308 Akt

Akt

14-3-3

PFKFB3

 $\alpha$ -tubulin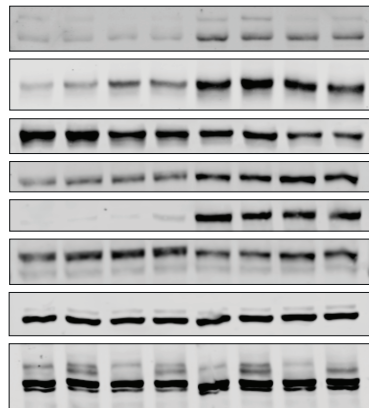

Supplement: fig6-figsupp2-data2 [file Fig6S2_source_data_2.pdf › Fig6S2_source_data_2.pdf]
