# Supplementary material for: The genetic and dietary landscape of the muscle insulin signalling network
Source: eLife. 2024 Feb 8;12:RP89212. doi: 10.7554/eLife.89212 (PMC10942587; doi:10.7554/eLife.89212)
Supplement: Supplementary file 1. — (Page 1 ‘01_quantification’) Normalised LFQ intensities of class I phosphopeptides. (Page 2 ‘02_analysis’) Statistical analysis of phosphoproteome data. [file elife-89212-supp1.xlsx]

## Sheet: 01_quantification
Columns identifying phosphopeptides					log2 phosphopeptide intensities
phosphopeptide	gene	uniprot	site	multiplicity	C57Bl6J_CHOW_bas_1	C57Bl6J_CHOW_bas_2	C57Bl6J_CHOW_bas_3	C57Bl6J_CHOW_bas_4	C57Bl6J_CHOW_ins_1	C57Bl6J_CHOW_ins_2	C57Bl6J_CHOW_ins_3	C57Bl6J_CHOW_ins_4	C57Bl6J_HFD_bas_1	C57Bl6J_HFD_bas_2	C57Bl6J_HFD_bas_3	C57Bl6J_HFD_bas_4	C57Bl6J_HFD_bas_5	C57Bl6J_HFD_ins_1	C57Bl6J_HFD_ins_2	C57Bl6J_HFD_ins_3	C57Bl6J_HFD_ins_4	C57Bl6J_HFD_ins_5	NOD_CHOW_bas_1	NOD_CHOW_bas_2	NOD_CHOW_bas_3	NOD_CHOW_bas_4	NOD_CHOW_bas_5	NOD_CHOW_ins_1	NOD_CHOW_ins_2	NOD_CHOW_ins_3	NOD_CHOW_ins_4	NOD_CHOW_ins_5	NOD_HFD_bas_1	NOD_HFD_bas_2	NOD_HFD_bas_3	NOD_HFD_bas_4	NOD_HFD_bas_5	NOD_HFD_ins_1	NOD_HFD_ins_2	NOD_HFD_ins_3	NOD_HFD_ins_4	NOD_HFD_ins_5	BXH9_CHOW_bas_1	BXH9_CHOW_bas_2	BXH9_CHOW_bas_3	BXH9_CHOW_bas_4	BXH9_CHOW_ins_1	BXH9_CHOW_ins_2	BXH9_CHOW_ins_3
1700017N19Rik_A0A087WPJ1_S194_1	1700017N19Rik	A0A087WPJ1	S194	1	16.1163	16.1331	15.6688	15.3721	15.5691	16.1774	15.6827	16.3125	16.1558	16.211	15.4091	15.5581	16.2507	15.7492	15.6432	15.6591	16.0045	16.5257	16.0806	15.8959	15.6988	15.9682	16.0107	15.8632	15.9114	15.3667	15.3504	16.5197	15.7517	15.7544	16.0191	15.6662	15.7031	16.258	15.3907	15.9427	15.653	15.8327	16.3074	16.1585	16.4408	15.3908	16.0421	16.4761	15.6493
Srcap_A0A087WQ44_S3073_1	Srcap	A0A087WQ44	S3073	1	NA	NA	14.8056	NA	NA	15.122	NA	NA	NA	NA	NA	NA	NA	NA	NA	NA	NA	14.2689	NA	NA	NA	NA	NA	NA	NA	NA	NA	NA	NA	NA	14.8633	NA	NA	NA	NA	NA	NA	NA	NA	NA	NA	NA	NA	NA	NA
Srcap_A0A087WQ44_S3062_1	Srcap	A0A087WQ44	S3062	1	NA	NA	NA	NA	NA	NA	NA	NA	NA	NA	NA	NA	15.0779	NA	NA	NA	NA	NA	NA	NA	NA	NA	NA	NA	NA	NA	NA	NA	NA	NA	NA	NA	NA	NA	NA	NA	NA	NA	NA	NA	NA	NA	NA	NA	NA
Srcap_A0A087WQ44_T1865_2	Srcap	A0A087WQ44	T1865	2	NA	12.601	18.57	NA	NA	17.6656	NA	12.6535	NA	NA	NA	11.418	NA	11.5011	NA	NA	NA	17.7927	NA	NA	NA	NA	NA	NA	18.7419	NA	NA	NA	11.3865	NA	NA	NA	NA	NA	NA	NA	NA	NA	NA	18.4073	NA	NA	13.7816	17.9866	NA
Srcap_A0A087WQ44_T1863_2	Srcap	A0A087WQ44	T1863	2	NA	12.601	18.57	NA	NA	17.6656	NA	12.6535	NA	NA	NA	11.418	NA	11.5011	NA	NA	NA	17.7927	NA	NA	NA	NA	NA	NA	18.7419	NA	NA	NA	11.3865	NA	NA	NA	NA	NA	NA	NA	NA	NA	NA	18.4073	NA	NA	13.7816	17.9866	NA
Prob1_A0A087WR45_S848_1	Prob1	A0A087WR45	S848	1	23.129	23.1076	22.9293	23.1004	23.0263	23.1006	22.9475	23.2097	23.0136	23.0232	23.011	23.234	23.0195	22.9774	22.7993	23.1352	23.1714	23.22	23.1536	23.5186	23.4867	23.3655	23.1418	23.4008	23.1567	23.4062	23.6427	23.4681	23.299	23.911	23.383	23.4223	23.2036	23.424	23.4407	23.4265	23.0213	23.4807	22.5398	22.8936	22.52	22.576	22.8707	22.6989	22.4838
Prob1_A0A087WR45_S398_2	Prob1	A0A087WR45	S398	2	22.1642	22.4364	22.7012	22.438	22.3771	22.6408	22.4403	22.377	22.4705	22.4748	22.7996	22.9345	22.7124	22.5424	22.5892	22.8122	23.0144	22.0312	21.9684	22.7168	22.6818	22.9328	23.0353	22.8068	22.5555	22.5473	23.0804	22.8237	22.6445	23.3195	23.0747	23.0073	23.035	22.9572	23.0397	22.8152	22.7355	23.0012	22.7556	22.9043	22.6193	22.5958	22.8785	21.5722	22.5027
Prob1_A0A087WR45_S396_2	Prob1	A0A087WR45	S396	2	22.1642	22.4364	22.7012	22.438	22.3771	22.6408	22.4403	22.377	22.4705	22.4748	22.7996	22.9345	22.7124	22.5424	22.5892	22.8122	23.0144	22.0312	21.9684	22.7168	22.6818	22.9328	22.9789	22.8068	22.5555	22.5473	23.0804	22.8237	22.6445	23.3195	23.0747	23.0073	23.035	22.9572	23.0397	22.8152	22.7355	23.0012	22.7556	22.9043	22.6193	22.5958	22.8785	21.5722	22.5027
Prob1_A0A087WR45_S407_3	Prob1	A0A087WR45	S407	3	NA	13.9309	17.3384	19.3836	NA	17.097	NA	NA	15.7281	18.6824	18.8854	NA	15.9427	19.1127	NA	NA	15.6411	NA	15.3902	14.7846	NA	14.9876	NA	18.1914	NA	NA	15.9316	NA	13.9795	14.1502	16.3855	17.2833	15.1419	NA	NA	NA	NA	19.0558	15.9543	18.1122	15.6523	17.6727	16.2413	16.0453	NA
Prob1_A0A087WR45_S398_3	Prob1	A0A087WR45	S398	3	14.9737	15.6837	17.5532	19.4652	NA	17.6111	13.9574	15.2144	16.8934	18.7501	18.9241	NA	16.4093	19.1659	NA	14.0369	15.6411	15.2532	15.3902	14.7846	NA	16.3849	15.3621	18.3002	NA	NA	16.1559	15.4466	15.6888	14.1502	16.9135	17.2833	16.1303	15.2968	NA	NA	14.6688	19.1613	15.9543	18.1122	16.6423	17.6727	16.2413	16.6391	NA
Prob1_A0A087WR45_S396_3	Prob1	A0A087WR45	S396	3	14.9737	15.6837	17.5532	19.4652	NA	17.6111	13.9574	15.2144	16.8934	18.7501	18.9241	NA	16.4093	19.1659	NA	14.0369	15.6411	15.2532	15.3902	14.7846	NA	16.3849	15.3621	18.3002	NA	NA	16.1559	15.4466	15.6888	14.1502	16.9135	17.2833	16.1303	15.2968	NA	NA	14.6688	19.1613	15.9543	18.1122	16.6423	17.6727	16.2413	16.6391	NA
Prob1_A0A087WR45_S398_1	Prob1	A0A087WR45	S398	1	NA	NA	NA	NA	16.5333	16.6728	NA	NA	NA	NA	NA	NA	NA	NA	NA	16.8496	NA	NA	NA	NA	NA	NA	NA	NA	NA	NA	NA	NA	NA	NA	17.1035	NA	17.2382	NA	NA	NA	17.001	NA	NA	NA	NA	NA	NA	NA	NA
Prob1_A0A087WR45_S396_1	Prob1	A0A087WR45	S396	1	15.3573	15.8776	16.1726	16.355	16.1601	NA	15.7218	NA	16.3283	15.4848	NA	16.8564	16.892	16.2595	NA	NA	16.9323	16.3937	NA	16.53	16.0781	16.5899	16.7736	16.1292	NA	NA	16.7573	16.1274	15.8682	NA	NA	16.6568	NA	15.9308	16.6476	16.7297	NA	NA	14.7659	16.6346	16.0655	16.1076	NA	15.6584	15.6659
Prob1_A0A087WR45_S415_3	Prob1	A0A087WR45	S415	3	14.9737	15.1758	14.6994	15.2813	NA	15.8733	13.9574	15.2144	16.0416	14.3021	13.6867	NA	14.5537	14.3777	NA	14.0369	NA	15.2532	NA	NA	NA	15.6961	15.3621	14.5181	NA	NA	13.3602	15.4466	15.1622	NA	15.2073	NA	15.1185	15.2968	NA	NA	14.6688	15.3349	NA	NA	15.6322	NA	NA	15.0716	NA
Prob1_A0A087WR45_S376_1	Prob1	A0A087WR45	S376	1	21.8063	21.7502	21.8194	21.8607	21.9614	21.9478	21.7474	21.9092	21.9968	22.1144	22.1044	22.1302	21.9901	22.1279	21.9794	22.1122	22.0836	22.1347	22.0246	22.1705	22.0655	22.2741	22.2499	22.1421	21.9988	22.1328	22.2254	22.3219	22.0802	22.4878	22.2277	21.8643	21.9315	22.0677	22.2133	21.748	21.7099	22.3428	21.3627	21.6554	21.3622	21.2097	21.4296	21.3435	21.1857
Prob1_A0A087WR45_S772_1	Prob1	A0A087WR45	S772	1	19.9679	20.2566	20.6675	20.6866	20.0904	20.5743	20.6748	20.9564	20.7119	20.855	20.882	20.7851	20.5781	20.8596	20.7455	20.8848	21.0538	20.6605	20.3615	21.1288	20.8959	21.2191	21.0743	20.881	20.5672	20.9896	21.1681	20.9129	20.8746	21.37	20.9747	20.62	20.8143	20.9929	20.7616	20.5468	20.461	21.0867	19.4152	20.4932	19.852	19.9988	19.8349	19.9678	20.0994
Prob1_A0A087WR45_S494_1	Prob1	A0A087WR45	S494	1	19.2176	18.9124	18.9042	18.8718	19.0585	18.8496	18.6427	18.8273	18.863	18.8517	18.5339	18.7829	18.3558	18.8112	18.6158	18.5413	18.595	19.0003	19.0753	19.0405	19.0878	19.2257	19.2374	19.0547	19.0142	19.0438	19.0035	19.0224	18.6428	18.7834	18.6661	18.9466	18.7911	18.8052	18.766	18.818	18.6735	18.4979	19.0966	19.3846	19.0438	19.0891	19.0507	19.2276	18.9447
Prob1_A0A087WR45_S798_1	Prob1	A0A087WR45	S798	1	NA	NA	17.1347	17.5793	NA	17.4309	15.1732	17.2199	17.03	16.9009	16.9199	17.3119	17.1507	17.6929	NA	17.0932	16.4089	17.8897	17.6598	17.4566	16.9862	16.69	17.2764	16.9457	17.5711	17.6648	17.306	17.4686	16.864	16.8014	17.8389	17.0151	17.241	15.9376	NA	17.1461	17.0895	17.657	16.8936	17.7254	17.0458	17.1233	17.4716	16.7856	16.906
Prob1_A0A087WR45_T791_1	Prob1	A0A087WR45	T791	1	NA	16.6989	NA	NA	NA	NA	NA	NA	NA	NA	NA	NA	NA	16.8024	16.5637	16.8709	NA	NA	NA	NA	NA	NA	NA	NA	NA	NA	NA	NA	NA	NA	NA	NA	NA	NA	NA	NA	NA	NA	NA	NA	NA	NA	NA	NA	NA
Prob1_A0A087WR45_S440_1	Prob1	A0A087WR45	S440	1	19.338	19.2323	18.921	19.1813	19.4911	19.7263	18.9912	19.224	18.4884	18.9281	19.4265	19.1689	18.9328	18.9852	18.5492	19.1842	19.4838	19.5706	18.4773	18.0494	18.9685	18.6582	18.4225	18.89	19.0799	19.4723	19.1023	18.6097	18.6988	19.3328	18.1017	18.8589	19.0903	19.3278	18.6431	18.9998	19.5287	17.8466	18.705	19.1685	18.2936	18.632	18.3351	18.9527	18.3449
Prob1_A0A087WR45_T743_1	Prob1	A0A087WR45	T743	1	16.3058	16.4021	16.0557	16.4266	16.3472	16.2248	16.0212	16.4862	16.4595	16.618	16.8018	16.9199	16.5361	16.6291	16.3779	16.9448	16.5337	16.7992	16.667	16.8021	16.9909	16.7694	16.7002	16.4382	16.3877	16.6989	16.6069	16.6899	16.7507	17.1425	17.1416	17.0902	16.5349	16.7795	17.0196	17.1411	16.2469	17.1533	15.8346	16.1683	15.8903	16.1358	15.883	16.1004	16.2449
Prob1_A0A087WR45_S668_1	Prob1	A0A087WR45	S668	1	15.257	15.396	15.2175	15.2307	15.3279	15.4196	15.4062	15.6084	15.5052	15.4657	15.2884	15.2283	14.9457	15.1895	15.2557	14.9589	14.8778	15.4695	15.3673	15.2654	15.1055	15.419	15.592	15.0842	15.3686	15.2225	15.1887	15.1882	14.8796	14.8584	14.9809	14.9954	14.5109	14.9176	14.993	14.57	14.4912	14.9057	14.4508	15.0029	14.2905	14.2167	14.5167	14.7728	14.7571
Prob1_A0A087WR45_S676_1	Prob1	A0A087WR45	S676	1	NA	NA	NA	NA	NA	NA	NA	NA	NA	NA	NA	NA	NA	NA	NA	NA	NA	NA	NA	NA	NA	NA	NA	NA	NA	NA	NA	NA	NA	NA	NA	NA	NA	NA	NA	NA	NA	NA	12.0468	NA	NA	14.1659	NA	NA	NA
Prob1_A0A087WR45_S93_1	Prob1	A0A087WR45	S93	1	14.792	14.8898	15.3269	14.9969	14.5316	15.4434	15.1961	15.1056	13.9522	14.3505	15.2864	15.8669	15.2487	14.8177	15.6103	15.2092	15.3178	15.3876	15.476	15.1933	14.7902	14.9622	14.0075	14.6125	15.314	14.9661	14.1379	14.2032	13.6964	13.5617	14.9233	15.1802	15.2639	14.909	13.5946	15.1343	15.1859	14.8499	14.8843	13.2547	14.2075	14.4974	12.4559	14.0263	13.9404
Prob1_A0A087WR45_S576_1	Prob1	A0A087WR45	S576	1	23.7039	23.8826	24.0616	24.0103	23.8612	24.0109	23.8361	23.8433	23.9037	23.8158	23.4838	23.8806	23.5643	23.9439	23.7005	23.5701	23.8108	23.9143	24.2705	24.5579	24.4044	24.5297	24.3858	24.1875	24.3205	24.222	24.3785	24.5426	23.8597	24.2961	23.9945	23.8671	24.2221	24.0617	23.8413	23.8782	24.0084	23.9993	24.096	24.369	23.8446	23.7894	24.1375	23.7515	23.7933
Prob1_A0A087WR45_T581_2	Prob1	A0A087WR45	T581	2	19.3995	19.7692	19.8372	19.5823	19.5941	19.547	19.489	19.3452	19.6341	19.414	19.1297	17.3481	17.5971	19.4827	19.1499	19.0458	19.0891	18.9849	18.4613	19.9575	19.6505	18.6692	18.1609	17.7881	18.9381	18.9827	19.6998	19.02	18.8814	17.6257	17.2567	18.4937	18.1562	18.6522	17.5269	17.0411	18.7476	19.1677	19.3235	19.6621	18.7138	18.7505	19.4182	18.681	18.4735
Prob1_A0A087WR45_S576_2	Prob1	A0A087WR45	S576	2	19.3995	19.7692	19.8372	19.5823	19.5941	19.547	19.489	19.3452	19.6341	19.414	19.1297	17.3481	17.5971	19.4827	19.1499	19.0458	19.0891	18.9849	18.4613	19.9575	19.6505	18.6692	18.1609	17.7881	18.9381	18.9827	19.6998	19.02	18.8814	17.6257	17.2567	18.4937	18.1562	18.6522	17.5269	17.0411	18.7476	19.1677	19.3235	19.6621	18.7138	18.7505	19.4182	18.681	18.4735
Prob1_A0A087WR45_S451_2	Prob1	A0A087WR45	S451	2	22.3382	22.9462	23.14	23.4128	22.7099	23.2069	23.1941	22.9748	23.2005	23.1487	23.1667	22.9407	22.8578	23.3306	23.0376	23.1633	22.9157	22.378	22.598	23.0174	23.107	23.3121	23.2465	23.2264	22.7853	22.9645	23.1723	23.0031	23.1395	22.991	23.104	22.9869	23.2607	23.1303	23.0705	23.1093	23.1908	22.9519	22.2396	22.9499	22.7508	23.3007	22.4648	23.0987	22.7778
Prob1_A0A087WR45_T449_2	Prob1	A0A087WR45	T449	2	22.3382	22.9462	23.1433	23.413	22.7125	23.2083	23.1981	22.9751	23.2005	23.1487	23.1667	22.9407	22.8578	23.3306	23.0376	23.1633	22.9157	22.3799	22.598	23.0174	23.107	23.3147	23.2465	23.2264	22.7853	22.9645	23.1723	23.0031	23.1395	22.9922	23.104	22.9869	23.2607	23.1303	23.0705	23.1093	23.1908	22.9519	22.2396	22.9499	22.7508	23.3015	22.4648	23.0987	22.7778
Prob1_A0A087WR45_S446_2	Prob1	A0A087WR45	S446	2	NA	NA	NA	NA	NA	NA	NA	NA	NA	NA	NA	NA	NA	NA	NA	NA	NA	NA	NA	NA	NA	NA	NA	NA	NA	NA	NA	NA	NA	NA	NA	NA	NA	NA	NA	NA	NA	NA	NA	NA	NA	NA	NA	NA	NA
Prob1_A0A087WR45_S451_3	Prob1	A0A087WR45	S451	3	NA	14.8973	14.4329	NA	NA	15.2479	14.0109	14.8332	13.9885	14.1232	14.8343	14.5275	NA	13.2379	NA	15.1509	NA	14.1183	NA	NA	NA	NA	13.6016	13.7051	NA	NA	14.1192	NA	NA	NA	NA	NA	NA	NA	NA	NA	14.3979	NA	NA	NA	13.6822	15.1579	NA	14.9511	NA
Prob1_A0A087WR45_T449_3	Prob1	A0A087WR45	T449	3	NA	14.8973	14.4329	NA	NA	15.2479	14.0109	14.8332	13.9885	14.1232	14.8343	14.5275	NA	13.2379	NA	15.1509	NA	14.1183	NA	NA	NA	NA	13.6016	13.7051	NA	NA	14.1192	NA	NA	NA	NA	NA	NA	NA	NA	NA	14.3979	NA	NA	NA	13.6822	15.1579	NA	14.9511	NA
Prob1_A0A087WR45_S446_3	Prob1	A0A087WR45	S446	3	NA	14.8973	14.4329	NA	NA	15.2479	14.0109	14.8332	13.9885	14.1232	14.8343	14.5275	NA	13.2379	NA	15.1509	NA	14.1183	NA	NA	NA	NA	13.6016	13.7051	NA	NA	14.1192	NA	NA	NA	NA	NA	NA	NA	NA	NA	14.3979	NA	NA	NA	13.6822	15.1579	NA	14.9511	NA
Prob1_A0A087WR45_T459_2	Prob1	A0A087WR45	T459	2	NA	NA	14.4077	10.3391	13.5833	13.2441	14.693	10.7464	NA	NA	NA	NA	NA	NA	NA	NA	NA	12.7995	NA	NA	NA	14.1865	NA	NA	NA	NA	NA	NA	NA	12.669	NA	NA	NA	NA	NA	NA	NA	NA	NA	NA	NA	12.5286	NA	NA	NA
Prob1_A0A087WR45_T700_2	Prob1	A0A087WR45	T700	2	NA	NA	NA	NA	NA	NA	NA	17.9945	NA	NA	NA	NA	NA	16.4181	NA	NA	NA	NA	18.0379	NA	NA	NA	16.8919	NA	17.2646	17.021	NA	16.7207	NA	NA	NA	17.3784	NA	NA	16.0931	NA	16.1245	17.2224	NA	NA	NA	17.3794	17.6807	NA	17.3449
Prob1_A0A087WR45_S692_2	Prob1	A0A087WR45	S692	2	NA	17.0735	16.8518	NA	NA	16.8785	17.2467	NA	NA	18.5036	16.3455	NA	NA	NA	18.2182	NA	NA	NA	NA	NA	NA	NA	NA	NA	NA	NA	NA	NA	16.6343	17.0716	16.7549	17.2781	NA	NA	NA	15.9984	NA	18.0402	17.1176	17.921	NA	17.7137	17.6807	18.1483	NA
Prob1_A0A087WR45_S696_2	Prob1	A0A087WR45	S696	2	NA	17.0735	16.8518	NA	NA	16.8785	17.2467	17.9945	NA	18.5036	16.3455	NA	NA	16.4181	18.2182	NA	NA	16.8399	17.1893	NA	NA	NA	16.8919	NA	18.207	17.021	NA	16.7207	16.6343	17.0716	16.7549	18.3291	NA	NA	16.0931	15.9984	NA	17.8939	18.8804	17.921	17.4708	18.5562	NA	18.1483	NA
Prob1_A0A087WR45_Y690_2	Prob1	A0A087WR45	Y690	2	NA	NA	NA	NA	NA	NA	NA	NA	NA	NA	NA	NA	NA	NA	NA	NA	NA	16.8399	16.8689	NA	NA	NA	NA	NA	17.1471	NA	NA	NA	NA	NA	NA	NA	NA	NA	NA	NA	16.1245	NA	18.3768	NA	17.4708	NA	NA	NA	17.3449
Prob1_A0A087WR45_S696_1	Prob1	A0A087WR45	S696	1	NA	NA	NA	NA	NA	NA	NA	NA	NA	NA	NA	NA	NA	NA	NA	NA	NA	NA	NA	15.9891	NA	NA	NA	NA	NA	NA	16.0708	16.1175	NA	NA	NA	NA	NA	NA	NA	NA	NA	NA	NA	NA	NA	NA	NA	NA	NA
Prob1_A0A087WR45_Y690_1	Prob1	A0A087WR45	Y690	1	NA	16.0612	NA	NA	NA	NA	NA	15.6081	NA	NA	15.4484	15.9165	14.9773	15.95	NA	15.6853	15.7434	15.8487	15.74	NA	NA	NA	NA	15.8636	14.8676	14.9479	NA	NA	15.8872	16.1994	16.2005	16.442	16.3094	15.5241	15.7835	15.6115	15.5195	15.3436	NA	NA	NA	16.0719	NA	NA	16.0562
Prob1_A0A087WR45_S692_1	Prob1	A0A087WR45	S692	1	16.2504	12.5752	NA	NA	12.2571	15.2876	NA	NA	NA	13.0903	NA	13.361	NA	NA	NA	NA	12.6347	12.8151	NA	NA	15.985	16.2372	16.3129	NA	NA	NA	NA	NA	NA	NA	13.4016	12.6189	13.1393	NA	12.4882	12.212	NA	12.3299	NA	NA	NA	NA	NA	NA	NA
Prob1_A0A087WR45_S177_1	Prob1	A0A087WR45	S177	1	NA	15.402	NA	NA	NA	NA	NA	NA	NA	15.9721	NA	15.7688	NA	NA	NA	15.3394	16.1575	NA	15.9977	NA	15.5368	NA	NA	15.6566	NA	15.7608	NA	NA	15.7429	NA	15.692	15.7024	15.9788	16.614	15.7411	15.229	15.7066	15.8352	15.1465	16.1711	15.2804	NA	15.7011	16.0432	15.7282
Prob1_A0A087WR45_S181_1	Prob1	A0A087WR45	S181	1	NA	NA	NA	NA	NA	NA	NA	NA	NA	NA	NA	NA	NA	NA	NA	NA	NA	NA	NA	NA	NA	NA	NA	NA	NA	NA	NA	NA	NA	NA	NA	NA	NA	NA	NA	NA	NA	NA	NA	NA	NA	NA	NA	NA	NA
Prob1_A0A087WR45_S83_1	Prob1	A0A087WR45	S83	1	13.4504	NA	11.9148	NA	13.5196	14.1383	13.2068	NA	NA	10.7713	NA	NA	NA	12.0811	12.5283	NA	NA	NA	14.0676	13.6237	13.8639	11.108	11.6175	NA	NA	13.2573	12.0512	NA	11.8692	13.2767	NA	NA	NA	NA	NA	10.2382	NA	12.693	NA	NA	NA	NA	NA	13.8224	NA
Prob1_A0A087WR45_S85_1	Prob1	A0A087WR45	S85	1	13.6925	NA	NA	NA	NA	15.0496	NA	14.1907	NA	12.7882	13.6303	12.6979	12.3737	13.5945	NA	13.1659	12.7225	15.4687	NA	NA	NA	12.7761	12.0553	13.5458	15.2113	13.9312	NA	NA	NA	NA	13.7353	12.9152	12.7692	13.3509	12.8705	13.3781	13.886	13.8139	14.2511	14.6786	13.8095	13.9779	13.6966	13.9618	12.4699
Prob1_A0A087WR45_T852_1	Prob1	A0A087WR45	T852	1	NA	15.6769	NA	NA	14.3242	NA	NA	NA	NA	NA	NA	NA	NA	NA	NA	NA	NA	13.9489	NA	15.8122	NA	NA	NA	NA	13.6285	15.7273	NA	NA	NA	NA	NA	NA	NA	NA	NA	NA	NA	NA	NA	NA	NA	14.7759	NA	14.2488	14.9616
Prob1_A0A087WR45_S407_2	Prob1	A0A087WR45	S407	2	NA	NA	NA	NA	NA	NA	NA	NA	NA	NA	NA	NA	NA	NA	NA	NA	NA	NA	NA	NA	NA	NA	18.3311	NA	NA	NA	NA	NA	NA	NA	NA	NA	NA	NA	NA	NA	NA	NA	NA	NA	NA	NA	NA	NA	NA
Prob1_A0A087WR45_S234_1	Prob1	A0A087WR45	S234	1	22.4443	22.1901	22.3661	22.4399	22.4826	22.4412	22.3595	22.5568	22.5026	22.6587	22.7134	22.669	22.5397	22.822	22.5993	22.5746	22.5603	22.7896	22.6202	22.8246	22.6879	22.5025	22.8544	22.7131	22.7553	22.7028	22.5609	22.6432	22.6164	23.1195	22.6864	22.6137	22.9263	22.7736	22.4452	22.6775	22.7631	22.5001	22.2518	22.8135	22.4297	22.0285	22.4207	22.3443	22.3039
Prob1_A0A087WR45_T232_1	Prob1	A0A087WR45	T232	1	NA	NA	NA	NA	NA	NA	NA	NA	14.9742	NA	NA	NA	NA	NA	12.5973	NA	11.2006	NA	NA	NA	NA	14.638	14.9574	NA	NA	14.8541	NA	NA	NA	NA	NA	NA	NA	NA	NA	12.3497	NA	NA	NA	NA	NA	14.0646	NA	NA	NA
Prob1_A0A087WR45_S39_1	Prob1	A0A087WR45	S39	1	14.7065	14.3771	14.9802	14.5604	14.6154	14.734	14.7402	NA	14.4041	14.1956	15.0037	15.2586	14.8598	13.9631	15.2035	14.9689	15.3802	14.9392	14.7852	15.2832	15.1669	15.4668	NA	15.2988	14.9697	14.5481	14.8166	NA	14.2339	15.3338	15.3352	15.5322	15.4357	14.9133	15.6948	15.4551	12.9192	15.7222	15.928	15.8411	15.3018	14.7086	15.7722	15.4613	NA
Prob1_A0A087WR45_S913_1	Prob1	A0A087WR45	S913	1	20.1477	19.8032	20.2614	20.099	19.8818	19.7043	19.9846	19.7517	20.3406	19.6823	19.4116	19.6675	19.1685	20.0891	19.9331	19.3251	19.3722	19.5249	20.1956	20.6072	19.876	18.7106	20.0457	19.7915	19.7767	19.6284	19.8551	20.0038	19.48	20.1311	20.3955	19.9642	20.2573	19.509	20.2147	19.9405	19.7487	19.9914	20.2012	19.1796	20.0586	19.6117	20.0923	19.57	20.0941
Prob1_A0A087WR45_S915_1	Prob1	A0A087WR45	S915	1	19.26	18.8929	19.1768	18.7674	18.997	18.9417	18.6472	NA	NA	18.351	17.8679	NA	17.6816	NA	NA	17.9649	17.9758	NA	19.004	19.2105	18.3173	20.354	18.3198	18.2709	18.5235	18.2248	NA	NA	NA	NA	19.1751	18.844	18.7936	NA	18.7639	18.3288	NA	18.6722	19.445	NA	NA	NA	19.4956	18.7354	18.8784
Prob1_A0A087WR45_S917_2	Prob1	A0A087WR45	S917	2	12.8473	NA	14.8546	NA	NA	NA	13.9264	NA	NA	14.0958	NA	13.1702	13.3862	NA	NA	13.1774	NA	13.5685	14.5528	NA	NA	NA	NA	NA	NA	NA	14.4187	NA	13.4763	NA	NA	NA	NA	NA	NA	NA	NA	NA	NA	13.7678	15.8988	14.6108	14.7703	NA	NA
Prob1_A0A087WR45_S913_2	Prob1	A0A087WR45	S913	2	12.8473	15.0335	14.8546	NA	13.7526	15.0982	13.9264	14.6461	14.7305	15.5901	14.1233	13.1702	13.3862	14.6423	14.5417	13.1774	14.6274	13.5685	14.5528	15.0309	14.6973	14.9111	14.269	13.9584	14.7174	14.6247	14.4187	14.6366	13.4763	NA	15.6635	NA	14.9058	NA	15.4816	14.88	14.5071	14.7521	15.4609	13.7678	14.5457	16.0621	16.1014	14.8853	15.2964
Prob1_A0A087WR45_S915_2	Prob1	A0A087WR45	S915	2	NA	15.0335	NA	NA	13.7526	15.0982	NA	14.6461	14.7305	14.9575	14.1233	NA	NA	14.6423	14.5417	NA	14.6274	NA	NA	15.0309	14.6973	14.9111	14.269	13.9584	14.7174	14.6247	NA	14.6366	NA	NA	15.6635	NA	14.9058	NA	15.4816	14.88	14.5071	14.7521	15.4609	NA	15.1822	15.4054	15.3705	14.8853	15.2964
Prob1_A0A087WR45_T581_1	Prob1	A0A087WR45	T581	1	15.7313	15.8109	15.9267	16.6996	15.9761	16.027	16.5153	16.876	16.4484	16.73	16.756	16.7257	16.2754	16.5768	16.4529	16.9223	16.6733	16.4162	15.4775	15.9238	16.4246	16.1766	16.5421	16.4114	15.6211	16.2621	16.56	16.499	16.6904	17.2333	16.3563	16.0033	16.253	16.7282	16.2308	16.0961	16.3091	16.671	14.1021	15.7075	14.7888	15.7134	14.9642	15.9992	15.333
Prob1_A0A087WR45_S423_1	Prob1	A0A087WR45	S423	1	17.6423	18.5949	17.6343	18.0709	16.2029	18.8924	17.7816	NA	19.2147	17.7455	16.3205	18.7492	18.7667	18.0784	17.4168	18.9525	18.1457	19.0764	18.1033	18.8279	17.8701	18.6359	18.0373	17.891	18.865	18.6332	17.6701	17.5654	18.7592	15.3556	18.8116	18.7206	19.1243	17.221	18.0472	17.9651	18.1843	17.9064	17.4107	16.7615	17.6431	16.8572	17.0444	16.5817	NA
Prob1_A0A087WR45_S422_1	Prob1	A0A087WR45	S422	1	17.4787	17.3268	17.4865	17.8762	18.4302	17.538	17.7122	18.3997	NA	18.5569	18.3779	NA	NA	18.9142	18.3628	17.7648	18.5432	NA	NA	NA	17.9393	18.1859	18.0254	18.8068	NA	17.5093	17.856	17.7571	NA	18.6298	18.1018	NA	NA	18.9247	18.0561	17.7074	17.8057	18.8303	NA	16.4889	NA	NA	NA	NA	17.447
Prob1_A0A087WR45_T279_1	Prob1	A0A087WR45	T279	1	NA	NA	NA	NA	NA	NA	NA	NA	NA	NA	NA	NA	NA	NA	NA	NA	NA	NA	NA	NA	NA	NA	NA	NA	NA	NA	NA	NA	NA	NA	NA	NA	NA	NA	NA	NA	NA	NA	NA	NA	NA	NA	NA	NA	NA
Prob1_A0A087WR45_S271_1	Prob1	A0A087WR45	S271	1	NA	NA	NA	NA	NA	NA	NA	NA	NA	NA	NA	NA	NA	NA	NA	NA	NA	NA	16.0024	NA	NA	NA	NA	NA	NA	NA	NA	NA	NA	NA	NA	NA	NA	NA	NA	NA	NA	NA	NA	NA	NA	NA	NA	NA	NA
Prob1_A0A087WR45_S281_1	Prob1	A0A087WR45	S281	1	NA	NA	NA	NA	NA	NA	NA	NA	NA	NA	NA	NA	NA	NA	NA	NA	NA	NA	NA	NA	NA	NA	NA	NA	NA	NA	NA	NA	NA	NA	NA	NA	NA	NA	NA	NA	NA	NA	NA	NA	16.3073	NA	NA	NA	NA
Prob1_A0A087WR45_S277_1	Prob1	A0A087WR45	S277	1	NA	13.0235	NA	NA	NA	13.2705	NA	NA	NA	NA	NA	NA	NA	NA	NA	NA	NA	NA	NA	NA	NA	NA	NA	NA	NA	13.5066	NA	NA	NA	NA	NA	13.4671	NA	NA	NA	NA	NA	NA	NA	NA	NA	NA	NA	NA	NA
Prob1_A0A087WR45_S281_2	Prob1	A0A087WR45	S281	2	NA	NA	12.3057	NA	NA	NA	12.6339	NA	NA	NA	12.9317	NA	NA	NA	NA	NA	NA	NA	NA	NA	NA	NA	NA	NA	NA	11.5823	NA	NA	12.0193	NA	NA	NA	NA	10.273	NA	NA	NA	NA	NA	NA	12.2807	NA	11.8838	NA	NA
Prob1_A0A087WR45_T279_2	Prob1	A0A087WR45	T279	2	NA	NA	12.3057	NA	NA	NA	12.6339	NA	NA	NA	12.9317	NA	NA	NA	NA	NA	NA	NA	NA	NA	NA	NA	NA	NA	NA	11.5823	NA	NA	12.0193	NA	NA	NA	NA	10.273	NA	NA	NA	NA	NA	NA	12.2807	NA	11.8838	NA	NA
Prob1_A0A087WR45_S177_2	Prob1	A0A087WR45	S177	2	NA	15.4267	NA	NA	NA	15.5602	NA	NA	NA	NA	NA	NA	NA	13.9653	NA	NA	NA	15.8412	NA	NA	14.0008	14.6788	NA	NA	NA	13.9281	NA	14.1331	NA	NA	15.9614	NA	NA	NA	NA	NA	NA	NA	NA	NA	NA	NA	NA	NA	NA
Prob1_A0A087WR45_Y168_2	Prob1	A0A087WR45	Y168	2	15.2247	15.4267	NA	NA	NA	15.5602	NA	NA	NA	NA	NA	NA	NA	13.9653	NA	NA	NA	15.8412	NA	NA	14.0008	14.6788	NA	NA	NA	13.9281	NA	14.1331	NA	NA	15.9614	NA	NA	NA	NA	NA	NA	NA	NA	NA	NA	NA	NA	NA	NA
Prob1_A0A087WR45_Y184_2	Prob1	A0A087WR45	Y184	2	15.2247	NA	NA	NA	NA	NA	NA	NA	NA	NA	NA	NA	NA	NA	NA	NA	NA	NA	NA	NA	NA	NA	NA	NA	NA	NA	NA	NA	NA	NA	NA	NA	NA	NA	NA	NA	NA	NA	NA	NA	NA	NA	NA	NA	NA
Prob1_A0A087WR45_S107_1	Prob1	A0A087WR45	S107	1	11.9384	12.1699	12.9944	11.1275	12.2238	12.9408	12.5126	10.9377	13.5567	NA	13.0466	12.1591	12.4102	12.0608	NA	13.719	NA	13.0636	11.6617	NA	10.7175	11.8712	12.3457	11.4746	12.8533	12.4287	11.8994	12.0381	10.9901	12.6484	11.9184	NA	13.0953	12.0078	12.7111	11.9245	11.4711	12.6158	13.9481	12.4152	12.2644	12.0336	12.0199	11.7267	11.2572
Prob1_A0A087WR45_S218_2	Prob1	A0A087WR45	S218	2	15.4933	16.1888	16.3011	14.3135	NA	14.1834	NA	14.454	16.4512	14.3524	13.0649	13.9988	15.501	16.2203	12.907	15.1117	14.9334	NA	NA	NA	NA	NA	15.3817	17.1419	NA	16.8062	NA	NA	16.5584	17.8518	16.3866	17.486	13.6578	16.9094	15.4839	14.3211	14.1354	16.9993	NA	NA	NA	NA	15.7816	NA	9.13418
Prob1_A0A087WR45_S216_2	Prob1	A0A087WR45	S216	2	15.4933	16.1888	16.3011	14.3135	NA	14.1834	NA	14.454	16.4512	14.476	13.0649	13.9988	15.501	16.2203	12.907	15.1117	14.9334	NA	NA	NA	NA	NA	15.3817	17.1419	NA	16.8108	NA	NA	16.5584	17.8518	16.3866	17.486	13.6578	16.9094	15.4839	14.3211	14.1354	16.9993	NA	NA	NA	NA	15.7816	NA	9.13418
Prob1_A0A087WR45_S216_1	Prob1	A0A087WR45	S216	1	NA	NA	18.6542	18.5449	NA	NA	13.4935	19.2226	18.6024	20.2528	15.6333	19.9665	13.95	14.883	19.0923	20.1082	18.6455	NA	NA	NA	NA	NA	18.7839	14.7452	NA	19.216	NA	NA	18.739	14.0357	13.3452	20.6414	20.2379	18.9046	19.7831	19.5975	11.1919	20.5607	NA	NA	NA	NA	18.8705	NA	NA
Prob1_A0A087WR45_S218_1	Prob1	A0A087WR45	S218	1	NA	NA	16.0842	14.9118	NA	NA	NA	15.6403	NA	NA	14.4133	NA	13.7367	NA	NA	NA	NA	NA	NA	NA	NA	NA	NA	NA	NA	16.2272	NA	NA	NA	NA	NA	NA	NA	NA	NA	NA	NA	NA	NA	NA	NA	NA	NA	NA	NA
Prob1_A0A087WR45_S221_2	Prob1	A0A087WR45	S221	2	NA	NA	NA	NA	NA	NA	NA	NA	NA	10.8699	NA	NA	NA	NA	NA	NA	NA	NA	NA	NA	NA	NA	NA	NA	NA	8.5356	NA	NA	NA	NA	NA	NA	NA	NA	NA	NA	NA	NA	NA	NA	NA	NA	NA	NA	NA
Gm9774_A0A0A6YVU8_S405_1	Gm9774	A0A0A6YVU8	S405	1	15.5969	15.9021	16.0336	16.004	15.3997	15.938	15.8155	15.9376	15.6475	15.889	16.2678	16.2369	16.1829	15.8239	15.8838	15.9957	15.4369	15.6695	15.6024	15.7844	15.9714	16.1873	16.069	16.0138	15.4071	16.0801	16.278	16.1915	16.1173	16.1486	15.9795	16.0342	16.0539	15.0631	15.9894	15.6398	15.8366	15.6298	14.9821	14.4254	15.4181	15.6467	14.5918	15.7142	15.453
Adrm1_Q9JKV1_S405_1	Adrm1	Q9JKV1	S405	1	15.5969	15.9021	16.0336	16.004	15.3997	15.938	15.8155	15.9376	15.6475	15.889	16.2678	16.2369	16.1829	15.8239	15.8838	15.9957	15.4369	15.6695	15.6024	15.7844	15.9714	16.1873	16.069	16.0138	15.4071	16.0801	16.278	16.1915	16.1173	16.1486	15.9795	16.0342	16.0539	15.0631	15.9894	15.6398	15.8366	15.6298	14.9821	14.4254	15.4181	15.6467	14.5918	15.7142	15.453
Gm9774_A0A0A6YVU8_S224_1	Gm9774	A0A0A6YVU8	S224	1	NA	NA	NA	NA	NA	15.5366	NA	NA	NA	NA	NA	NA	NA	15.628	NA	NA	NA	15.6967	NA	NA	NA	NA	NA	NA	NA	NA	NA	NA	NA	NA	NA	NA	NA	NA	NA	NA	NA	NA	NA	NA	NA	NA	NA	NA	NA
Adrm1_Q9JKV1_S224_1	Adrm1	Q9JKV1	S224	1	NA	NA	NA	NA	NA	15.5366	NA	NA	NA	NA	NA	NA	NA	15.628	NA	NA	NA	15.6967	NA	NA	NA	NA	NA	NA	NA	NA	NA	NA	NA	NA	NA	NA	NA	NA	NA	NA	NA	NA	NA	NA	NA	NA	NA	NA	NA
Gm9774_A0A0A6YVU8_S219_1	Gm9774	A0A0A6YVU8	S219	1	15.6392	NA	NA	15.3913	15.3888	NA	15.298	NA	NA	NA	NA	NA	NA	NA	15.44	15.2493	NA	NA	NA	NA	NA	16.0831	NA	NA	NA	NA	15.8659	NA	NA	NA	NA	NA	NA	NA	NA	NA	NA	NA	NA	NA	NA	NA	NA	NA	NA
Adrm1_Q9JKV1_S219_1	Adrm1	Q9JKV1	S219	1	15.6392	NA	NA	15.3913	15.3888	NA	15.298	NA	NA	NA	NA	NA	NA	NA	15.44	15.2493	NA	NA	NA	NA	NA	16.0831	NA	NA	NA	NA	15.8659	NA	NA	NA	NA	NA	NA	NA	NA	NA	NA	NA	NA	NA	NA	NA	NA	NA	NA
Gm9774_A0A0A6YVU8_S223_1	Gm9774	A0A0A6YVU8	S223	1	NA	NA	NA	NA	NA	15.5418	NA	NA	15.8377	NA	NA	NA	15.8981	NA	NA	NA	15.8624	NA	NA	NA	NA	NA	NA	NA	NA	NA	NA	NA	16.0109	16.1256	NA	NA	15.9664	15.8714	NA	15.3786	NA	NA	15.628	NA	NA	NA	NA	NA	NA
Adrm1_Q9JKV1_S223_1	Adrm1	Q9JKV1	S223	1	NA	NA	NA	NA	NA	15.5418	NA	NA	15.8377	NA	NA	NA	15.8981	NA	NA	NA	15.8624	NA	NA	NA	NA	NA	NA	NA	NA	NA	NA	NA	16.0109	16.1256	NA	NA	15.9664	15.8714	NA	15.3786	NA	NA	15.628	NA	NA	NA	NA	NA	NA
Gm9774_A0A0A6YVU8_S211_1	Gm9774	A0A0A6YVU8	S211	1	NA	NA	NA	NA	NA	NA	NA	NA	14.9067	NA	NA	14.7379	14.7831	15.0777	15.0337	14.9526	NA	NA	NA	NA	NA	NA	NA	NA	NA	NA	NA	15.609	NA	NA	NA	14.81	14.6786	NA	14.6826	14.4765	14.735	15.2911	NA	NA	NA	NA	NA	NA	15.0319
Adrm1_Q9JKV1_S211_1	Adrm1	Q9JKV1	S211	1	NA	NA	NA	NA	NA	NA	NA	NA	14.9067	NA	NA	14.7379	14.7831	15.0777	15.0337	14.9526	NA	NA	NA	NA	NA	NA	NA	NA	NA	NA	NA	15.609	NA	NA	NA	14.81	14.6786	NA	14.6826	14.4765	14.735	15.2911	NA	NA	NA	NA	NA	NA	15.0319
Gm9774_A0A0A6YVU8_S213_1	Gm9774	A0A0A6YVU8	S213	1	15.5002	14.9062	14.6249	NA	15.2234	15.183	14.4761	14.8396	14.8905	14.731	15.1802	NA	NA	13.8746	NA	NA	15.0457	15.4267	14.9438	15.1523	15.2492	15.3819	15.0116	15.0627	15.0433	15.261	15.6423	NA	15.1741	15.3312	NA	14.9419	NA	NA	NA	NA	NA	15.1915	15.2653	14.9551	15.0925	15.0491	14.8813	15.1779	NA
Adrm1_Q9JKV1_S213_1	Adrm1	Q9JKV1	S213	1	15.5002	14.9062	14.6249	NA	15.2234	15.183	14.4761	14.8396	14.8905	14.731	15.1802	NA	NA	13.8746	NA	NA	15.0457	15.4267	14.9438	15.1523	15.2492	15.3819	15.0116	15.0627	15.0433	15.261	15.6423	NA	15.1741	15.3312	NA	14.9419	NA	NA	NA	NA	NA	15.1915	15.2653	14.9551	15.0925	15.0491	14.8813	15.1779	NA
Gm9774_A0A0A6YVU8_T217_1	Gm9774	A0A0A6YVU8	T217	1	NA	NA	NA	14.5006	NA	NA	NA	NA	NA	NA	NA	NA	NA	NA	NA	NA	NA	NA	NA	NA	NA	NA	NA	NA	14.3981	NA	NA	NA	NA	NA	NA	NA	NA	NA	NA	NA	NA	NA	NA	NA	NA	NA	NA	NA	NA
Adrm1_Q9JKV1_T217_1	Adrm1	Q9JKV1	T217	1	NA	NA	NA	14.5006	NA	NA	NA	NA	NA	NA	NA	NA	NA	NA	NA	NA	NA	NA	NA	NA	NA	NA	NA	NA	14.3981	NA	NA	NA	NA	NA	NA	NA	NA	NA	NA	NA	NA	NA	NA	NA	NA	NA	NA	NA	NA
Gm9774_A0A0A6YVU8_S224_2	Gm9774	A0A0A6YVU8	S224	2	NA	NA	NA	NA	NA	NA	NA	NA	NA	NA	NA	NA	NA	NA	NA	NA	NA	NA	NA	NA	NA	NA	NA	NA	NA	NA	NA	NA	NA	NA	NA	NA	NA	NA	NA	NA	NA	NA	NA	NA	NA	NA	NA	NA	NA
Gm9774_A0A0A6YVU8_S219_2	Gm9774	A0A0A6YVU8	S219	2	NA	NA	NA	NA	NA	NA	NA	NA	NA	NA	NA	NA	NA	NA	NA	NA	NA	NA	NA	NA	NA	NA	NA	NA	NA	NA	NA	NA	NA	NA	NA	NA	NA	NA	NA	NA	NA	NA	NA	NA	NA	NA	NA	NA	NA
Adrm1_Q9JKV1_S224_2	Adrm1	Q9JKV1	S224	2	NA	NA	NA	NA	NA	NA	NA	NA	NA	NA	NA	NA	NA	NA	NA	NA	NA	NA	NA	NA	NA	NA	NA	NA	NA	NA	NA	NA	NA	NA	NA	NA	NA	NA	NA	NA	NA	NA	NA	NA	NA	NA	NA	NA	NA
Adrm1_Q9JKV1_S219_2	Adrm1	Q9JKV1	S219	2	NA	NA	NA	NA	NA	NA	NA	NA	NA	NA	NA	NA	NA	NA	NA	NA	NA	NA	NA	NA	NA	NA	NA	NA	NA	NA	NA	NA	NA	NA	NA	NA	NA	NA	NA	NA	NA	NA	NA	NA	NA	NA	NA	NA	NA
Gm9774_A0A0A6YVU8_S221_2	Gm9774	A0A0A6YVU8	S221	2	NA	NA	NA	NA	NA	NA	NA	NA	NA	NA	NA	NA	NA	NA	NA	NA	NA	NA	NA	NA	NA	NA	NA	NA	NA	NA	NA	NA	NA	NA	NA	NA	NA	NA	NA	NA	NA	NA	NA	NA	NA	NA	NA	NA	NA
Adrm1_Q9JKV1_S221_2	Adrm1	Q9JKV1	S221	2	NA	NA	NA	NA	NA	NA	NA	NA	NA	NA	NA	NA	NA	NA	NA	NA	NA	NA	NA	NA	NA	NA	NA	NA	NA	NA	NA	NA	NA	NA	NA	NA	NA	NA	NA	NA	NA	NA	NA	NA	NA	NA	NA	NA	NA
Gm8797_A0A0A6YW67_S57_1	Gm8797	A0A0A6YW67	S57	1	16.7123	16.6329	16.7717	16.5079	16.7312	16.6591	16.1136	16.4279	16.7722	16.7852	16.5554	16.9241	16.6456	16.3013	16.5495	16.6761	16.8643	17.0286	16.8482	16.8657	16.7601	16.5303	16.8238	16.6915	16.7277	16.8488	16.3897	16.406	16.7314	16.8328	16.6857	16.9125	16.9417	16.7589	16.6823	16.458	17.0187	16.6418	16.2618	16.3605	16.0429	16.0482	16.2367	16.0805	16.1542
Ubb_P0CG49_S57_1	Ubb	P0CG49	S57	1	16.7123	16.6329	16.7717	16.5079	16.7312	16.6591	16.1136	16.4279	16.7722	16.7852	16.5554	16.9241	16.6456	16.3013	16.5495	16.6761	16.8643	17.0286	16.8482	16.8657	16.7601	16.5303	16.8238	16.6915	16.7277	16.8488	16.3897	16.406	16.7314	16.8328	16.6857	16.9125	16.9417	16.7589	16.6823	16.458	17.0187	16.6418	16.2618	16.3605	16.0429	16.0482	16.2367	16.0805	16.1542
Ubb_P0CG49_S133_1	Ubb	P0CG49	S133	1	16.7123	16.6329	16.7717	16.5079	16.7312	16.6591	16.1136	16.4279	16.7722	16.7852	16.5554	16.9241	16.6456	16.3013	16.5495	16.6761	16.8643	17.0286	16.8482	16.8657	16.7601	16.5303	16.8238	16.6915	16.7277	16.8488	16.3897	16.406	16.7314	16.8328	16.6857	16.9125	16.9417	16.7589	16.6823	16.458	17.0187	16.6418	16.2618	16.3605	16.0429	16.0482	16.2367	16.0805	16.1542
Ubb_P0CG49_S209_1	Ubb	P0CG49	S209	1	16.7123	16.6329	16.7717	16.5079	16.7312	16.6591	16.1136	16.4279	16.7722	16.7852	16.5554	16.9241	16.6456	16.3013	16.5495	16.6761	16.8643	17.0286	16.8482	16.8657	16.7601	16.5303	16.8238	16.6915	16.7277	16.8488	16.3897	16.406	16.7314	16.8328	16.6857	16.9125	16.9417	16.7589	16.6823	16.458	17.0187	16.6418	16.2618	16.3605	16.0429	16.0482	16.2367	16.0805	16.1542
Ubb_P0CG49_S285_1	Ubb	P0CG49	S285	1	16.7123	16.6329	16.7717	16.5079	16.7312	16.6591	16.1136	16.4279	16.7722	16.7852	16.5554	16.9241	16.6456	16.3013	16.5495	16.6761	16.8643	17.0286	16.8482	16.8657	16.7601	16.5303	16.8238	16.6915	16.7277	16.8488	16.3897	16.406	16.7314	16.8328	16.6857	16.9125	16.9417	16.7589	16.6823	16.458	17.0187	16.6418	16.2618	16.3605	16.0429	16.0482	16.2367	16.0805	16.1542
Ubc_P0CG50_S57_1	Ubc	P0CG50	S57	1	16.7123	16.6329	16.7717	16.5079	16.7312	16.6591	16.1136	16.4279	16.7722	16.7852	16.5554	16.9241	16.6456	16.3013	16.5495	16.6761	16.8643	17.0286	16.8482	16.8657	16.7601	16.5303	16.8238	16.6915	16.7277	16.8488	16.3897	16.406	16.7314	16.8328	16.6857	16.9125	16.9417	16.7589	16.6823	16.458	17.0187	16.6418	16.2618	16.3605	16.0429	16.0482	16.2367	16.0805	16.1542
Ubc_P0CG50_S133_1	Ubc	P0CG50	S133	1	16.7123	16.6329	16.7717	16.5079	16.7312	16.6591	16.1136	16.4279	16.7722	16.7852	16.5554	16.9241	16.6456	16.3013	16.5495	16.6761	16.8643	17.0286	16.8482	16.8657	16.7601	16.5303	16.8238	16.6915	16.7277	16.8488	16.3897	16.406	16.7314	16.8328	16.6857	16.9125	16.9417	16.7589	16.6823	16.458	17.0187	16.6418	16.2618	16.3605	16.0429	16.0482	16.2367	16.0805	16.1542
Ubc_P0CG50_S209_1	Ubc	P0CG50	S209	1	16.7123	16.6329	16.7717	16.5079	16.7312	16.6591	16.1136	16.4279	16.7722	16.7852	16.5554	16.9241	16.6456	16.3013	16.5495	16.6761	16.8643	17.0286	16.8482	16.8657	16.7601	16.5303	16.8238	16.6915	16.7277	16.8488	16.3897	16.406	16.7314	16.8328	16.6857	16.9125	16.9417	16.7589	16.6823	16.458	17.0187	16.6418	16.2618	16.3605	16.0429	16.0482	16.2367	16.0805	16.1542
Ubc_P0CG50_S285_1	Ubc	P0CG50	S285	1	16.7123	16.6329	16.7717	16.5079	16.7312	16.6591	16.1136	16.4279	16.7722	16.7852	16.5554	16.9241	16.6456	16.3013	16.5495	16.6761	16.8643	17.0286	16.8482	16.8657	16.7601	16.5303	16.8238	16.6915	16.7277	16.8488	16.3897	16.406	16.7314	16.8328	16.6857	16.9125	16.9417	16.7589	16.6823	16.458	17.0187	16.6418	16.2618	16.3605	16.0429	16.0482	16.2367	16.0805	16.1542
Ubc_P0CG50_S361_1	Ubc	P0CG50	S361	1	16.7123	16.6329	16.7717	16.5079	16.7312	16.6591	16.1136	16.4279	16.7722	16.7852	16.5554	16.9241	16.6456	16.3013	16.5495	16.6761	16.8643	17.0286	16.8482	16.8657	16.7601	16.5303	16.8238	16.6915	16.7277	16.8488	16.3897	16.406	16.7314	16.8328	16.6857	16.9125	16.9417	16.7589	16.6823	16.458	17.0187	16.6418	16.2618	16.3605	16.0429	16.0482	16.2367	16.0805	16.1542
Ubc_P0CG50_S437_1	Ubc	P0CG50	S437	1	16.7123	16.6329	16.7717	16.5079	16.7312	16.6591	16.1136	16.4279	16.7722	16.7852	16.5554	16.9241	16.6456	16.3013	16.5495	16.6761	16.8643	17.0286	16.8482	16.8657	16.7601	16.5303	16.8238	16.6915	16.7277	16.8488	16.3897	16.406	16.7314	16.8328	16.6857	16.9125	16.9417	16.7589	16.6823	16.458	17.0187	16.6418	16.2618	16.3605	16.0429	16.0482	16.2367	16.0805	16.1542
Ubc_P0CG50_S513_1	Ubc	P0CG50	S513	1	16.7123	16.6329	16.7717	16.5079	16.7312	16.6591	16.1136	16.4279	16.7722	16.7852	16.5554	16.9241	16.6456	16.3013	16.5495	16.6761	16.8643	17.0286	16.8482	16.8657	16.7601	16.5303	16.8238	16.6915	16.7277	16.8488	16.3897	16.406	16.7314	16.8328	16.6857	16.9125	16.9417	16.7589	16.6823	16.458	17.0187	16.6418	16.2618	16.3605	16.0429	16.0482	16.2367	16.0805	16.1542
Ubc_P0CG50_S589_1	Ubc	P0CG50	S589	1	16.7123	16.6329	16.7717	16.5079	16.7312	16.6591	16.1136	16.4279	16.7722	16.7852	16.5554	16.9241	16.6456	16.3013	16.5495	16.6761	16.8643	17.0286	16.8482	16.8657	16.7601	16.5303	16.8238	16.6915	16.7277	16.8488	16.3897	16.406	16.7314	16.8328	16.6857	16.9125	16.9417	16.7589	16.6823	16.458	17.0187	16.6418	16.2618	16.3605	16.0429	16.0482	16.2367	16.0805	16.1542
Ubc_P0CG50_S665_1	Ubc	P0CG50	S665	1	16.7123	16.6329	16.7717	16.5079	16.7312	16.6591	16.1136	16.4279	16.7722	16.7852	16.5554	16.9241	16.6456	16.3013	16.5495	16.6761	16.8643	17.0286	16.8482	16.8657	16.7601	16.5303	16.8238	16.6915	16.7277	16.8488	16.3897	16.406	16.7314	16.8328	16.6857	16.9125	16.9417	16.7589	16.6823	16.458	17.0187	16.6418	16.2618	16.3605	16.0429	16.0482	16.2367	16.0805	16.1542
Rps27a_P62983_S57_1	Rps27a	P62983	S57	1	16.7123	16.6329	16.7717	16.5079	16.7312	16.6591	16.1136	16.4279	16.7722	16.7852	16.5554	16.9241	16.6456	16.3013	16.5495	16.6761	16.8643	17.0286	16.8482	16.8657	16.7601	16.5303	16.8238	16.6915	16.7277	16.8488	16.3897	16.406	16.7314	16.8328	16.6857	16.9125	16.9417	16.7589	16.6823	16.458	17.0187	16.6418	16.2618	16.3605	16.0429	16.0482	16.2367	16.0805	16.1542
Uba52_P62984_S57_1	Uba52	P62984	S57	1	16.7123	16.6329	16.7717	16.5079	16.7312	16.6591	16.1136	16.4279	16.7722	16.7852	16.5554	16.9241	16.6456	16.3013	16.5495	16.6761	16.8643	17.0286	16.8482	16.8657	16.7601	16.5303	16.8238	16.6915	16.7277	16.8488	16.3897	16.406	16.7314	16.8328	16.6857	16.9125	16.9417	16.7589	16.6823	16.458	17.0187	16.6418	16.2618	16.3605	16.0429	16.0482	16.2367	16.0805	16.1542
Gm8797_A0A0A6YW67_S65_1	Gm8797	A0A0A6YW67	S65	1	13.1695	12.0547	12.0023	11.3038	13.0787	13.1444	13.1131	13.1245	10.7304	13.1237	13.2702	13.2642	10.3818	13.423	12.8749	12.8757	13.5284	12.8154	12.9651	13.2349	12.6196	12.9023	11.1376	13.1539	12.1954	12.4947	12.1821	12.642	12.8419	13.374	12.7222	13.4916	13.2115	13.8306	12.3257	12.878	13.317	13.1539	12.4662	12.7341	11.6831	12.3804	12.6397	12.6927	12.8347
Ubb_P0CG49_S65_1	Ubb	P0CG49	S65	1	13.1695	12.0547	12.0023	11.3038	13.0787	13.1444	13.1131	13.1245	10.7304	13.1237	13.2702	13.2642	10.3818	13.423	12.8749	12.8757	13.5284	12.8154	12.9651	13.2349	12.6196	12.9023	11.1376	13.1539	12.1954	12.4947	12.1821	12.642	12.8419	13.374	12.7222	13.4916	13.2115	13.8306	12.3257	12.878	13.317	13.1539	12.4662	12.7341	11.6831	12.3804	12.6397	12.6927	12.8347
Ubb_P0CG49_S141_1	Ubb	P0CG49	S141	1	13.1695	12.0547	12.0023	11.3038	13.0787	13.1444	13.1131	13.1245	10.7304	13.1237	13.2702	13.2642	10.3818	13.423	12.8749	12.8757	13.5284	12.8154	12.9651	13.2349	12.6196	12.9023	11.1376	13.1539	12.1954	12.4947	12.1821	12.642	12.8419	13.374	12.7222	13.4916	13.2115	13.8306	12.3257	12.878	13.317	13.1539	12.4662	12.7341	11.6831	12.3804	12.6397	12.6927	12.8347
Ubb_P0CG49_S217_1	Ubb	P0CG49	S217	1	13.1695	12.0547	12.0023	11.3038	13.0787	13.1444	13.1131	13.1245	10.7304	13.1237	13.2702	13.2642	10.3818	13.423	12.8749	12.8757	13.5284	12.8154	12.9651	13.2349	12.6196	12.9023	11.1376	13.1539	12.1954	12.4947	12.1821	12.642	12.8419	13.374	12.7222	13.4916	13.2115	13.8306	12.3257	12.878	13.317	13.1539	12.4662	12.7341	11.6831	12.3804	12.6397	12.6927	12.8347
Ubb_P0CG49_S293_1	Ubb	P0CG49	S293	1	13.1695	12.0547	12.0023	11.3038	13.0787	13.1444	13.1131	13.1245	10.7304	13.1237	13.2702	13.2642	10.3818	13.423	12.8749	12.8757	13.5284	12.8154	12.9651	13.2349	12.6196	12.9023	11.1376	13.1539	12.1954	12.4947	12.1821	12.642	12.8419	13.374	12.7222	13.4916	13.2115	13.8306	12.3257	12.878	13.317	13.1539	12.4662	12.7341	11.6831	12.3804	12.6397	12.6927	12.8347
Ubc_P0CG50_S65_1	Ubc	P0CG50	S65	1	13.1695	12.0547	12.0023	11.3038	13.0787	13.1444	13.1131	13.1245	10.7304	13.1237	13.2702	13.2642	10.3818	13.423	12.8749	12.8757	13.5284	12.8154	12.9651	13.2349	12.6196	12.9023	11.1376	13.1539	12.1954	12.4947	12.1821	12.642	12.8419	13.374	12.7222	13.4916	13.2115	13.8306	12.3257	12.878	13.317	13.1539	12.4662	12.7341	11.6831	12.3804	12.6397	12.6927	12.8347
Ubc_P0CG50_S141_1	Ubc	P0CG50	S141	1	13.1695	12.0547	12.0023	11.3038	13.0787	13.1444	13.1131	13.1245	10.7304	13.1237	13.2702	13.2642	10.3818	13.423	12.8749	12.8757	13.5284	12.8154	12.9651	13.2349	12.6196	12.9023	11.1376	13.1539	12.1954	12.4947	12.1821	12.642	12.8419	13.374	12.7222	13.4916	13.2115	13.8306	12.3257	12.878	13.317	13.1539	12.4662	12.7341	11.6831	12.3804	12.6397	12.6927	12.8347
Ubc_P0CG50_S217_1	Ubc	P0CG50	S217	1	13.1695	12.0547	12.0023	11.3038	13.0787	13.1444	13.1131	13.1245	10.7304	13.1237	13.2702	13.2642	10.3818	13.423	12.8749	12.8757	13.5284	12.8154	12.9651	13.2349	12.6196	12.9023	11.1376	13.1539	12.1954	12.4947	12.1821	12.642	12.8419	13.374	12.7222	13.4916	13.2115	13.8306	12.3257	12.878	13.317	13.1539	12.4662	12.7341	11.6831	12.3804	12.6397	12.6927	12.8347
Ubc_P0CG50_S293_1	Ubc	P0CG50	S293	1	13.1695	12.0547	12.0023	11.3038	13.0787	13.1444	13.1131	13.1245	10.7304	13.1237	13.2702	13.2642	10.3818	13.423	12.8749	12.8757	13.5284	12.8154	12.9651	13.2349	12.6196	12.9023	11.1376	13.1539	12.1954	12.4947	12.1821	12.642	12.8419	13.374	12.7222	13.4916	13.2115	13.8306	12.3257	12.878	13.317	13.1539	12.4662	12.7341	11.6831	12.3804	12.6397	12.6927	12.8347
Ubc_P0CG50_S369_1	Ubc	P0CG50	S369	1	13.1695	12.0547	12.0023	11.3038	13.0787	13.1444	13.1131	13.1245	10.7304	13.1237	13.2702	13.2642	10.3818	13.423	12.8749	12.8757	13.5284	12.8154	12.9651	13.2349	12.6196	12.9023	11.1376	13.1539	12.1954	12.4947	12.1821	12.642	12.8419	13.374	12.7222	13.4916	13.2115	13.8306	12.3257	12.878	13.317	13.1539	12.4662	12.7341	11.6831	12.3804	12.6397	12.6927	12.8347
Ubc_P0CG50_S445_1	Ubc	P0CG50	S445	1	13.1695	12.0547	12.0023	11.3038	13.0787	13.1444	13.1131	13.1245	10.7304	13.1237	13.2702	13.2642	10.3818	13.423	12.8749	12.8757	13.5284	12.8154	12.9651	13.2349	12.6196	12.9023	11.1376	13.1539	12.1954	12.4947	12.1821	12.642	12.8419	13.374	12.7222	13.4916	13.2115	13.8306	12.3257	12.878	13.317	13.1539	12.4662	12.7341	11.6831	12.3804	12.6397	12.6927	12.8347
Ubc_P0CG50_S521_1	Ubc	P0CG50	S521	1	13.1695	12.0547	12.0023	11.3038	13.0787	13.1444	13.1131	13.1245	10.7304	13.1237	13.2702	13.2642	10.3818	13.423	12.8749	12.8757	13.5284	12.8154	12.9651	13.2349	12.6196	12.9023	11.1376	13.1539	12.1954	12.4947	12.1821	12.642	12.8419	13.374	12.7222	13.4916	13.2115	13.8306	12.3257	12.878	13.317	13.1539	12.4662	12.7341	11.6831	12.3804	12.6397	12.6927	12.8347
Ubc_P0CG50_S597_1	Ubc	P0CG50	S597	1	13.1695	12.0547	12.0023	11.3038	13.0787	13.1444	13.1131	13.1245	10.7304	13.1237	13.2702	13.2642	10.3818	13.423	12.8749	12.8757	13.5284	12.8154	12.9651	13.2349	12.6196	12.9023	11.1376	13.1539	12.1954	12.4947	12.1821	12.642	12.8419	13.374	12.7222	13.4916	13.2115	13.8306	12.3257	12.878	13.317	13.1539	12.4662	12.7341	11.6831	12.3804	12.6397	12.6927	12.8347
Ubc_P0CG50_S673_1	Ubc	P0CG50	S673	1	13.1695	12.0547	12.0023	11.3038	13.0787	13.1444	13.1131	13.1245	10.7304	13.1237	13.2702	13.2642	10.3818	13.423	12.8749	12.8757	13.5284	12.8154	12.9651	13.2349	12.6196	12.9023	11.1376	13.1539	12.1954	12.4947	12.1821	12.642	12.8419	13.374	12.7222	13.4916	13.2115	13.8306	12.3257	12.878	13.317	13.1539	12.4662	12.7341	11.6831	12.3804	12.6397	12.6927	12.8347
Rps27a_P62983_S65_1	Rps27a	P62983	S65	1	13.1695	12.0547	12.0023	11.3038	13.0787	13.1444	13.1131	13.1245	10.7304	13.1237	13.2702	13.2642	10.3818	13.423	12.8749	12.8757	13.5284	12.8154	12.9651	13.2349	12.6196	12.9023	11.1376	13.1539	12.1954	12.4947	12.1821	12.642	12.8419	13.374	12.7222	13.4916	13.2115	13.8306	12.3257	12.878	13.317	13.1539	12.4662	12.7341	11.6831	12.3804	12.6397	12.6927	12.8347
Uba52_P62984_S65_1	Uba52	P62984	S65	1	13.1695	12.0547	12.0023	11.3038	13.0787	13.1444	13.1131	13.1245	10.7304	13.1237	13.2702	13.2642	10.3818	13.423	12.8749	12.8757	13.5284	12.8154	12.9651	13.2349	12.6196	12.9023	11.1376	13.1539	12.1954	12.4947	12.1821	12.642	12.8419	13.374	12.7222	13.4916	13.2115	13.8306	12.3257	12.878	13.317	13.1539	12.4662	12.7341	11.6831	12.3804	12.6397	12.6927	12.8347
Gm8797_A0A0A6YW67_T66_1	Gm8797	A0A0A6YW67	T66	1	13.1402	12.3817	12.2429	12.8969	11.6834	12.3339	12.7035	12.7429	13.1828	12.574	12.826	12.8695	12.5153	NA	12.3285	NA	NA	12.3259	12.9962	NA	12.3007	12.6472	12.9446	12.791	11.7225	NA	12.5555	12.4318	12.5655	12.9257	NA	NA	NA	13.407	NA	12.5104	10.6784	NA	12.1931	11.0773	11.731	12.2153	NA	12.5518	12.681
Ubb_P0CG49_T66_1	Ubb	P0CG49	T66	1	13.1402	12.3817	12.2429	12.8969	11.6834	12.3339	12.7035	12.7429	13.1828	12.574	12.826	12.8695	12.5153	NA	12.3285	NA	NA	12.3259	12.9962	NA	12.3007	12.6472	12.9446	12.791	11.7225	NA	12.5555	12.4318	12.5655	12.9257	NA	NA	NA	13.407	NA	12.5104	10.6784	NA	12.1931	11.0773	11.731	12.2153	NA	12.5518	12.681
Ubb_P0CG49_T142_1	Ubb	P0CG49	T142	1	13.1402	12.3817	12.2429	12.8969	11.6834	12.3339	12.7035	12.7429	13.1828	12.574	12.826	12.8695	12.5153	NA	12.3285	NA	NA	12.3259	12.9962	NA	12.3007	12.6472	12.9446	12.791	11.7225	NA	12.5555	12.4318	12.5655	12.9257	NA	NA	NA	13.407	NA	12.5104	10.6784	NA	12.1931	11.0773	11.731	12.2153	NA	12.5518	12.681
Ubb_P0CG49_T218_1	Ubb	P0CG49	T218	1	13.1402	12.3817	12.2429	12.8969	11.6834	12.3339	12.7035	12.7429	13.1828	12.574	12.826	12.8695	12.5153	NA	12.3285	NA	NA	12.3259	12.9962	NA	12.3007	12.6472	12.9446	12.791	11.7225	NA	12.5555	12.4318	12.5655	12.9257	NA	NA	NA	13.407	NA	12.5104	10.6784	NA	12.1931	11.0773	11.731	12.2153	NA	12.5518	12.681
Ubb_P0CG49_T294_1	Ubb	P0CG49	T294	1	13.1402	12.3817	12.2429	12.8969	11.6834	12.3339	12.7035	12.7429	13.1828	12.574	12.826	12.8695	12.5153	NA	12.3285	NA	NA	12.3259	12.9962	NA	12.3007	12.6472	12.9446	12.791	11.7225	NA	12.5555	12.4318	12.5655	12.9257	NA	NA	NA	13.407	NA	12.5104	10.6784	NA	12.1931	11.0773	11.731	12.2153	NA	12.5518	12.681
Ubc_P0CG50_T66_1	Ubc	P0CG50	T66	1	13.1402	12.3817	12.2429	12.8969	11.6834	12.3339	12.7035	12.7429	13.1828	12.574	12.826	12.8695	12.5153	NA	12.3285	NA	NA	12.3259	12.9962	NA	12.3007	12.6472	12.9446	12.791	11.7225	NA	12.5555	12.4318	12.5655	12.9257	NA	NA	NA	13.407	NA	12.5104	10.6784	NA	12.1931	11.0773	11.731	12.2153	NA	12.5518	12.681
Ubc_P0CG50_T142_1	Ubc	P0CG50	T142	1	13.1402	12.3817	12.2429	12.8969	11.6834	12.3339	12.7035	12.7429	13.1828	12.574	12.826	12.8695	12.5153	NA	12.3285	NA	NA	12.3259	12.9962	NA	12.3007	12.6472	12.9446	12.791	11.7225	NA	12.5555	12.4318	12.5655	12.9257	NA	NA	NA	13.407	NA	12.5104	10.6784	NA	12.1931	11.0773	11.731	12.2153	NA	12.5518	12.681
Ubc_P0CG50_T218_1	Ubc	P0CG50	T218	1	13.1402	12.3817	12.2429	12.8969	11.6834	12.3339	12.7035	12.7429	13.1828	12.574	12.826	12.8695	12.5153	NA	12.3285	NA	NA	12.3259	12.9962	NA	12.3007	12.6472	12.9446	12.791	11.7225	NA	12.5555	12.4318	12.5655	12.9257	NA	NA	NA	13.407	NA	12.5104	10.6784	NA	12.1931	11.0773	11.731	12.2153	NA	12.5518	12.681
Ubc_P0CG50_T294_1	Ubc	P0CG50	T294	1	13.1402	12.3817	12.2429	12.8969	11.6834	12.3339	12.7035	12.7429	13.1828	12.574	12.826	12.8695	12.5153	NA	12.3285	NA	NA	12.3259	12.9962	NA	12.3007	12.6472	12.9446	12.791	11.7225	NA	12.5555	12.4318	12.5655	12.9257	NA	NA	NA	13.407	NA	12.5104	10.6784	NA	12.1931	11.0773	11.731	12.2153	NA	12.5518	12.681
Ubc_P0CG50_T370_1	Ubc	P0CG50	T370	1	13.1402	12.3817	12.2429	12.8969	11.6834	12.3339	12.7035	12.7429	13.1828	12.574	12.826	12.8695	12.5153	NA	12.3285	NA	NA	12.3259	12.9962	NA	12.3007	12.6472	12.9446	12.791	11.7225	NA	12.5555	12.4318	12.5655	12.9257	NA	NA	NA	13.407	NA	12.5104	10.6784	NA	12.1931	11.0773	11.731	12.2153	NA	12.5518	12.681
Ubc_P0CG50_T446_1	Ubc	P0CG50	T446	1	13.1402	12.3817	12.2429	12.8969	11.6834	12.3339	12.7035	12.7429	13.1828	12.574	12.826	12.8695	12.5153	NA	12.3285	NA	NA	12.3259	12.9962	NA	12.3007	12.6472	12.9446	12.791	11.7225	NA	12.5555	12.4318	12.5655	12.9257	NA	NA	NA	13.407	NA	12.5104	10.6784	NA	12.1931	11.0773	11.731	12.2153	NA	12.5518	12.681
Ubc_P0CG50_T522_1	Ubc	P0CG50	T522	1	13.1402	12.3817	12.2429	12.8969	11.6834	12.3339	12.7035	12.7429	13.1828	12.574	12.826	12.8695	12.5153	NA	12.3285	NA	NA	12.3259	12.9962	NA	12.3007	12.6472	12.9446	12.791	11.7225	NA	12.5555	12.4318	12.5655	12.9257	NA	NA	NA	13.407	NA	12.5104	10.6784	NA	12.1931	11.0773	11.731	12.2153	NA	12.5518	12.681
Ubc_P0CG50_T598_1	Ubc	P0CG50	T598	1	13.1402	12.3817	12.2429	12.8969	11.6834	12.3339	12.7035	12.7429	13.1828	12.574	12.826	12.8695	12.5153	NA	12.3285	NA	NA	12.3259	12.9962	NA	12.3007	12.6472	12.9446	12.791	11.7225	NA	12.5555	12.4318	12.5655	12.9257	NA	NA	NA	13.407	NA	12.5104	10.6784	NA	12.1931	11.0773	11.731	12.2153	NA	12.5518	12.681
Ubc_P0CG50_T674_1	Ubc	P0CG50	T674	1	13.1402	12.3817	12.2429	12.8969	11.6834	12.3339	12.7035	12.7429	13.1828	12.574	12.826	12.8695	12.5153	NA	12.3285	NA	NA	12.3259	12.9962	NA	12.3007	12.6472	12.9446	12.791	11.7225	NA	12.5555	12.4318	12.5655	12.9257	NA	NA	NA	13.407	NA	12.5104	10.6784	NA	12.1931	11.0773	11.731	12.2153	NA	12.5518	12.681
Rps27a_P62983_T66_1	Rps27a	P62983	T66	1	13.1402	12.3817	12.2429	12.8969	11.6834	12.3339	12.7035	12.7429	13.1828	12.574	12.826	12.8695	12.5153	NA	12.3285	NA	NA	12.3259	12.9962	NA	12.3007	12.6472	12.9446	12.791	11.7225	NA	12.5555	12.4318	12.5655	12.9257	NA	NA	NA	13.407	NA	12.5104	10.6784	NA	12.1931	11.0773	11.731	12.2153	NA	12.5518	12.681
Uba52_P62984_T66_1	Uba52	P62984	T66	1	13.1402	12.3817	12.2429	12.8969	11.6834	12.3339	12.7035	12.7429	13.1828	12.574	12.826	12.8695	12.5153	NA	12.3285	NA	NA	12.3259	12.9962	NA	12.3007	12.6472	12.9446	12.791	11.7225	NA	12.5555	12.4318	12.5655	12.9257	NA	NA	NA	13.407	NA	12.5104	10.6784	NA	12.1931	11.0773	11.731	12.2153	NA	12.5518	12.681
Gm8797_A0A0A6YW67_T12_1	Gm8797	A0A0A6YW67	T12	1	NA	NA	NA	NA	NA	NA	NA	NA	NA	NA	NA	NA	NA	NA	NA	14.2802	NA	NA	NA	NA	NA	NA	NA	NA	NA	NA	NA	NA	NA	NA	NA	NA	NA	NA	NA	NA	NA	NA	NA	NA	NA	15.4798	NA	NA	NA
Ubb_P0CG49_T12_1	Ubb	P0CG49	T12	1	NA	NA	NA	NA	NA	NA	NA	NA	NA	NA	NA	NA	NA	NA	NA	14.2802	NA	NA	NA	NA	NA	NA	NA	NA	NA	NA	NA	NA	NA	NA	NA	NA	NA	NA	NA	NA	NA	NA	NA	NA	NA	15.4798	NA	NA	NA
Ubb_P0CG49_T88_1	Ubb	P0CG49	T88	1	NA	NA	NA	NA	NA	NA	NA	NA	NA	NA	NA	NA	NA	NA	NA	14.2802	NA	NA	NA	NA	NA	NA	NA	NA	NA	NA	NA	NA	NA	NA	NA	NA	NA	NA	NA	NA	NA	NA	NA	NA	NA	15.4798	NA	NA	NA
Ubb_P0CG49_T164_1	Ubb	P0CG49	T164	1	NA	NA	NA	NA	NA	NA	NA	NA	NA	NA	NA	NA	NA	NA	NA	14.2802	NA	NA	NA	NA	NA	NA	NA	NA	NA	NA	NA	NA	NA	NA	NA	NA	NA	NA	NA	NA	NA	NA	NA	NA	NA	15.4798	NA	NA	NA
Ubb_P0CG49_T240_1	Ubb	P0CG49	T240	1	NA	NA	NA	NA	NA	NA	NA	NA	NA	NA	NA	NA	NA	NA	NA	14.2802	NA	NA	NA	NA	NA	NA	NA	NA	NA	NA	NA	NA	NA	NA	NA	NA	NA	NA	NA	NA	NA	NA	NA	NA	NA	15.4798	NA	NA	NA
Ubc_P0CG50_T12_1	Ubc	P0CG50	T12	1	NA	NA	NA	NA	NA	NA	NA	NA	NA	NA	NA	NA	NA	NA	NA	14.2802	NA	NA	NA	NA	NA	NA	NA	NA	NA	NA	NA	NA	NA	NA	NA	NA	NA	NA	NA	NA	NA	NA	NA	NA	NA	15.4798	NA	NA	NA
Ubc_P0CG50_T88_1	Ubc	P0CG50	T88	1	NA	NA	NA	NA	NA	NA	NA	NA	NA	NA	NA	NA	NA	NA	NA	14.2802	NA	NA	NA	NA	NA	NA	NA	NA	NA	NA	NA	NA	NA	NA	NA	NA	NA	NA	NA	NA	NA	NA	NA	NA	NA	15.4798	NA	NA	NA
Ubc_P0CG50_T164_1	Ubc	P0CG50	T164	1	NA	NA	NA	NA	NA	NA	NA	NA	NA	NA	NA	NA	NA	NA	NA	14.2802	NA	NA	NA	NA	NA	NA	NA	NA	NA	NA	NA	NA	NA	NA	NA	NA	NA	NA	NA	NA	NA	NA	NA	NA	NA	15.4798	NA	NA	NA
Ubc_P0CG50_T240_1	Ubc	P0CG50	T240	1	NA	NA	NA	NA	NA	NA	NA	NA	NA	NA	NA	NA	NA	NA	NA	14.2802	NA	NA	NA	NA	NA	NA	NA	NA	NA	NA	NA	NA	NA	NA	NA	NA	NA	NA	NA	NA	NA	NA	NA	NA	NA	15.4798	NA	NA	NA
Ubc_P0CG50_T316_1	Ubc	P0CG50	T316	1	NA	NA	NA	NA	NA	NA	NA	NA	NA	NA	NA	NA	NA	NA	NA	14.2802	NA	NA	NA	NA	NA	NA	NA	NA	NA	NA	NA	NA	NA	NA	NA	NA	NA	NA	NA	NA	NA	NA	NA	NA	NA	15.4798	NA	NA	NA
Ubc_P0CG50_T392_1	Ubc	P0CG50	T392	1	NA	NA	NA	NA	NA	NA	NA	NA	NA	NA	NA	NA	NA	NA	NA	14.2802	NA	NA	NA	NA	NA	NA	NA	NA	NA	NA	NA	NA	NA	NA	NA	NA	NA	NA	NA	NA	NA	NA	NA	NA	NA	15.4798	NA	NA	NA
Ubc_P0CG50_T468_1	Ubc	P0CG50	T468	1	NA	NA	NA	NA	NA	NA	NA	NA	NA	NA	NA	NA	NA	NA	NA	14.2802	NA	NA	NA	NA	NA	NA	NA	NA	NA	NA	NA	NA	NA	NA	NA	NA	NA	NA	NA	NA	NA	NA	NA	NA	NA	15.4798	NA	NA	NA
Ubc_P0CG50_T544_1	Ubc	P0CG50	T544	1	NA	NA	NA	NA	NA	NA	NA	NA	NA	NA	NA	NA	NA	NA	NA	14.2802	NA	NA	NA	NA	NA	NA	NA	NA	NA	NA	NA	NA	NA	NA	NA	NA	NA	NA	NA	NA	NA	NA	NA	NA	NA	15.4798	NA	NA	NA
Ubc_P0CG50_T620_1	Ubc	P0CG50	T620	1	NA	NA	NA	NA	NA	NA	NA	NA	NA	NA	NA	NA	NA	NA	NA	14.2802	NA	NA	NA	NA	NA	NA	NA	NA	NA	NA	NA	NA	NA	NA	NA	NA	NA	NA	NA	NA	NA	NA	NA	NA	NA	15.4798	NA	NA	NA
Rps27a_P62983_T12_1	Rps27a	P62983	T12	1	NA	NA	NA	NA	NA	NA	NA	NA	NA	NA	NA	NA	NA	NA	NA	14.2802	NA	NA	NA	NA	NA	NA	NA	NA	NA	NA	NA	NA	NA	NA	NA	NA	NA	NA	NA	NA	NA	NA	NA	NA	NA	15.4798	NA	NA	NA
Uba52_P62984_T12_1	Uba52	P62984	T12	1	NA	NA	NA	NA	NA	NA	NA	NA	NA	NA	NA	NA	NA	NA	NA	14.2802	NA	NA	NA	NA	NA	NA	NA	NA	NA	NA	NA	NA	NA	NA	NA	NA	NA	NA	NA	NA	NA	NA	NA	NA	NA	15.4798	NA	NA	NA
Pcdh7_A0A0A6YY83_T1013_1	Pcdh7	A0A0A6YY83	T1013	1	NA	15.1424	NA	15.6202	NA	NA	NA	15.2524	15.3023	15.5463	15.0215	14.5007	14.9475	NA	15.1781	NA	14.4354	NA	NA	NA	NA	NA	NA	NA	NA	14.9515	15.1988	NA	15.2945	14.7431	14.8777	NA	15.084	15.1849	14.8638	15.2224	15.427	14.5054	NA	NA	NA	NA	NA	NA	NA
Pcdh7_A0A0A6YY83_S1011_1	Pcdh7	A0A0A6YY83	S1011	1	NA	NA	15.2077	NA	14.802	14.9118	11.4911	NA	NA	NA	NA	NA	13.0199	NA	NA	14.6183	NA	15.0698	NA	15.2659	15.139	15.2117	NA	14.9441	NA	NA	NA	NA	12.8387	NA	NA	14.842	NA	NA	NA	NA	12.2954	NA	15.4546	NA	NA	14.8434	NA	11.3378	15.2167
Pcdh7_A0A0A6YY83_T1004_1	Pcdh7	A0A0A6YY83	T1004	1	14.3665	NA	NA	NA	NA	NA	14.8767	NA	NA	NA	NA	NA	NA	NA	15.1592	NA	NA	NA	15.4723	NA	NA	NA	NA	NA	15.2054	NA	NA	15.2048	NA	NA	NA	NA	15.0194	NA	NA	NA	NA	NA	NA	14.6632	14.6288	NA	15.0059	14.7666	NA
Pcdh7_A0A0A6YY83_S989_1	Pcdh7	A0A0A6YY83	S989	1	14.1502	14.0935	14.2851	14.7823	13.6244	14.1902	13.7042	14.0919	14.7543	14.2732	14.5296	14.5395	14.6172	14.3964	14.3452	14.4536	14.0376	13.4893	14.1562	14.7203	14.6513	14.5542	14.7272	14.3078	14.4977	14.8142	14.0832	14.9129	14.6896	14.6958	14.7949	14.6211	13.9522	13.8404	14.5782	14.4611	14.2005	14.4294	14.0324	12.9963	11.6318	13.316	12.8693	13.068	13.4722
Pcdh7_A0A0A6YY83_S974_1	Pcdh7	A0A0A6YY83	S974	1	NA	NA	17.3853	15.0122	14.9936	13.3379	NA	13.8845	13.9249	14.3574	NA	14.1134	12.1369	14.0502	13.8332	12.6195	NA	13.5592	14.9909	13.943	14.2624	14.7195	13.6327	13.9546	14.7178	13.7911	14.4311	14.1081	14.4274	NA	14.4862	12.9214	13.2502	NA	11.9029	13.7968	14.0498	13.6816	14.0937	12.8744	12.6374	13.4312	NA	13.24	NA
Tchh_A0A0B4J1F9_S195_1	Tchh	A0A0B4J1F9	S195	1	NA	13.4258	14.2954	14.7838	15.3328	14.1083	16.4547	NA	15.7718	16.1678	15.7954	15.2714	14.2559	16.4808	15.2359	16.3893	NA	14.2624	13.9987	14.5723	14.3187	12.8677	NA	15.4246	16.5545	17.716	14.5168	18.8719	15.5018	14.6277	15.4691	14.0407	13.7776	10.2699	15.2985	NA	13.9604	15.0417	NA	14.0695	NA	NA	NA	13.3148	NA
Crybg1_A0A0G2JG52_S881_1	Crybg1	A0A0G2JG52	S881	1	15.0839	13.2643	14.7323	14.4816	14.8604	15.2963	14.4078	14.8753	14.9749	14.9378	15.1236	14.8156	14.3772	15.1076	14.9069	14.9234	15.0022	15.2022	14.8902	14.5327	15.0179	14.5133	14.7075	NA	NA	NA	14.8978	14.9951	14.0593	14.7301	14.6421	13.6863	14.6908	14.8379	14.0463	12.6373	14.4772	14.6972	14.3457	13.87	13.7897	13.7274	13.8038	NA	14.9209
Lcmt1_A0A0U1RNF2_S247_1	Lcmt1	A0A0U1RNF2	S247	1	18.222	17.0997	17.6333	17.8821	18.8441	18.3656	18.3035	18.5136	17.0699	17.5699	17.6956	17.5908	17.8392	18.5697	18.0093	17.545	17.9998	17.6886	17.2769	16.692	17.0766	17.3659	17.0116	17.675	17.4006	17.5143	16.9323	17.7522	17.1093	17.632	16.8357	17.6603	17.3335	17.4605	16.8592	17.9037	17.9383	17.9643	17.7597	17.8268	17.5931	17.2838	17.6169	17.6057	17.4163
Lcmt1_A0A0U1RNF2_T255_1	Lcmt1	A0A0U1RNF2	T255	1	12.019	NA	13.6588	NA	NA	13.0188	NA	NA	12.6257	NA	NA	11.62	NA	NA	NA	NA	NA	NA	12.2148	NA	NA	NA	NA	NA	13.368	NA	NA	NA	NA	NA	NA	NA	NA	NA	NA	11.5106	NA	NA	NA	NA	NA	NA	NA	NA	NA
Cep85l_A0A1W2P884_S17_1	Cep85l	A0A1W2P884	S17	1	NA	NA	NA	15.5775	14.2969	14.6412	NA	14.9734	14.7534	NA	15.345	15.6703	NA	NA	NA	NA	NA	NA	NA	NA	NA	13.8872	NA	NA	NA	15.041	14.0054	NA	NA	NA	NA	NA	15.4597	NA	NA	NA	15.4817	NA	13.6318	NA	NA	NA	NA	13.9622	NA
Cep85l_A0A1W2P884_S15_1	Cep85l	A0A1W2P884	S15	1	14.3728	13.7551	15.9905	16.0028	NA	13.9802	15.8432	15.5401	15.6411	16.4111	14.354	14.5245	16.213	15.8332	NA	16.2405	16.1459	15.5342	15.6171	15.8248	15.8316	14.772	14.535	15.9473	15.6046	15.5749	14.481	15.9645	16.2257	15.8556	16.147	15.2609	12.4931	15.6981	15.5416	15.9154	12.9057	15.5257	14.0817	14.4966	13.4141	13.476	14.245	13.9622	13.9744
Dcaf4_A0A1Y7VNZ0_S32_1	Dcaf4	A0A1Y7VNZ0	S32	1	14.6173	15.3365	NA	14.4782	14.5504	14.1006	13.6076	NA	14.2002	14.2326	15.2961	15.2054	13.6502	13.8405	14.6819	15.1302	13.8311	12.0416	14.6489	13.3758	14.4533	15.0615	13.6437	NA	14.6015	13.8556	14.3239	14.6387	13.5345	14.3413	13.9674	NA	NA	14.3399	14.6953	NA	13.2932	15.1446	14.7673	13.8861	14.0885	14.6594	14.928	14.9183	13.597
Kif13b_A0A286YCV9_S1380_1	Kif13b	A0A286YCV9	S1380	1	19.2333	18.8714	18.8308	19.2154	18.9187	18.6209	18.315	18.7881	18.9879	18.8553	18.7019	18.7208	18.7572	18.4657	18.8151	18.7555	18.7233	18.9733	19.346	18.7604	18.8635	18.5974	18.8094	18.6807	18.8907	18.7537	18.8714	18.9512	18.6912	19.0819	18.8059	18.3513	18.276	18.7541	18.7893	18.7607	18.5382	18.8069	18.4727	18.1148	18.292	18.3661	18.0928	18.2844	18.4801
Kif13b_A0A286YCV9_S1378_1	Kif13b	A0A286YCV9	S1378	1	14.5904	14.2084	14.7717	NA	14.5155	14.686	NA	NA	15.7376	NA	15.8576	15.1135	15.5727	16.3421	13.8733	16.1579	NA	14.3468	14.6379	14.2395	NA	15.9833	NA	15.6366	14.9235	NA	15.3596	NA	15.7294	NA	15.4954	16.1818	15.2128	13.753	NA	NA	15.3971	15.1602	13.8609	NA	12.9038	NA	12.8758	15.3993	NA
Kif13b_A0A286YCV9_S1798_1	Kif13b	A0A286YCV9	S1798	1	NA	NA	NA	NA	NA	19.1484	NA	NA	NA	NA	NA	NA	NA	NA	NA	NA	NA	NA	NA	19.4723	NA	NA	NA	NA	NA	NA	NA	NA	NA	NA	NA	19.086	NA	NA	NA	19.2195	NA	NA	NA	NA	19.7218	NA	NA	19.4964	NA
Kif13b_A0A286YCV9_S1658_1	Kif13b	A0A286YCV9	S1658	1	NA	NA	NA	NA	NA	NA	NA	NA	NA	NA	NA	NA	NA	NA	NA	NA	NA	NA	NA	NA	NA	NA	NA	NA	NA	NA	NA	NA	NA	NA	NA	NA	NA	NA	NA	NA	NA	NA	NA	NA	NA	NA	NA	15.3676	NA
Kif13b_A0A286YCV9_S1653_1	Kif13b	A0A286YCV9	S1653	1	15.1099	15.501	NA	NA	NA	14.7814	14.8152	14.9048	15.3299	NA	14.6728	15.1879	12.3952	13.9544	15.2046	14.9264	13.6934	NA	15.6221	15.3417	NA	NA	15.2104	14.9796	NA	NA	NA	14.7871	14.6773	15.5256	15.1443	13.5249	NA	15.2342	12.5219	NA	NA	15.404	14.7508	NA	NA	NA	14.8435	NA	15.2375
Kif13b_A0A286YCV9_T1657_1	Kif13b	A0A286YCV9	T1657	1	NA	NA	15.2692	15.6416	14.9897	NA	NA	NA	NA	NA	NA	NA	NA	NA	NA	NA	NA	14.8611	NA	NA	15.5149	15.0747	NA	NA	14.9398	14.7892	15.2308	NA	NA	NA	NA	NA	NA	NA	NA	15.6231	15.3488	NA	NA	NA	15.1075	NA	NA	NA	NA
Kif13b_A0A286YCV9_S1799_2	Kif13b	A0A286YCV9	S1799	2	19.3329	19.0244	19.3412	18.6961	19.729	19.581	19.4595	19.349	18.9773	18.3942	18.952	18.0522	18.8109	19.6634	19.1581	18.8269	18.2805	18.7099	19.226	18.8648	19.0592	18.8457	19.0214	18.8241	19.2278	18.8492	18.2975	18.6304	18.8936	18.8864	18.5132	18.5376	18.6473	18.6961	18.1794	18.8385	18.9602	18.3405	19.5899	18.3779	18.9273	19.0321	18.4833	19.1162	18.7164
Kif13b_A0A286YCV9_S1798_2	Kif13b	A0A286YCV9	S1798	2	19.3329	19.0244	19.3412	18.6961	19.729	19.581	19.4595	19.349	18.9773	18.3942	18.952	18.0522	18.8109	19.6634	19.1581	18.8269	18.2805	18.7099	19.226	18.8648	19.0592	18.8457	19.0214	18.8241	19.2278	18.8492	18.2975	18.6304	18.8936	18.8864	18.5132	18.5376	18.6473	18.6961	18.1794	18.8385	18.9602	18.3405	19.5899	18.3779	18.9273	19.0321	18.4833	19.1162	18.7164
Kif13b_A0A286YCV9_S1390_1	Kif13b	A0A286YCV9	S1390	1	17.1047	17.23	17.0856	17.6241	16.7675	16.6693	16.6236	16.9184	17.2641	17.0379	16.9173	17.1413	16.8642	16.6219	16.9116	16.9346	16.4753	17.2275	17.5729	17.1846	17.2691	17.0171	17.0315	16.9598	17.5789	17.0881	17.2892	17.3797	17.2904	17.3306	17.2201	16.6201	16.9064	16.6687	17.0461	17.0027	17.2046	17.0529	17.1023	16.8366	16.7573	16.5308	16.6711	16.5273	17.0044
Kif13b_A0A286YCV9_S1388_1	Kif13b	A0A286YCV9	S1388	1	NA	NA	NA	NA	NA	NA	NA	NA	NA	NA	NA	14.8952	NA	NA	NA	NA	NA	NA	NA	NA	NA	NA	NA	NA	NA	NA	NA	NA	NA	NA	NA	NA	NA	NA	NA	NA	NA	NA	NA	NA	NA	NA	NA	NA	NA
Kif13b_A0A286YCV9_S1799_1	Kif13b	A0A286YCV9	S1799	1	15.1791	15.6245	16.0752	12.9801	15.3438	NA	NA	12.1506	NA	12.4427	15.5141	15.4333	15.4592	NA	NA	15.3448	NA	15.5809	13.5902	12.8405	13.5813	11.839	12.6141	12.0989	13.9567	15.7995	15.8428	13.3201	11.7199	12.288	15.2411	14.9992	15.2532	12.7399	15.1674	12.0567	15.7289	14.7688	15.2572	11.0633	15.2368	15.3336	10.283	15.3897	10.8389
Kif13b_A0A286YCV9_S1824_1	Kif13b	A0A286YCV9	S1824	1	14.1482	NA	NA	NA	13.1805	NA	12.9697	13.5327	13.9658	13.8205	13.28	13.6855	12.5816	NA	13.5534	12.9704	12.4048	NA	NA	NA	NA	12.7533	13.5607	13.2551	12.9976	13.1512	NA	NA	12.9271	13.8124	13.0197	13.1303	13.1806	NA	12.5022	NA	NA	12.8668	NA	NA	NA	NA	10.8551	NA	NA
Kif13b_A0A286YCV9_S1818_1	Kif13b	A0A286YCV9	S1818	1	NA	NA	12.9364	NA	NA	NA	NA	NA	NA	NA	NA	NA	NA	NA	NA	NA	NA	NA	NA	NA	NA	NA	NA	NA	NA	NA	12.1612	NA	NA	NA	NA	NA	NA	NA	NA	NA	NA	NA	NA	NA	NA	NA	NA	10.6452	11.9087
Kif13b_A0A286YCV9_T1820_1	Kif13b	A0A286YCV9	T1820	1	NA	13.0453	13.6909	NA	NA	NA	NA	NA	13.1156	NA	NA	NA	NA	NA	NA	NA	NA	NA	13.5305	NA	13.9105	NA	NA	NA	11.9964	NA	13.1752	NA	NA	NA	12.4669	NA	NA	NA	NA	13.4281	14.0113	NA	NA	NA	NA	NA	NA	NA	NA
Kif13b_A0A286YCV9_S1816_1	Kif13b	A0A286YCV9	S1816	1	12.708	NA	NA	NA	NA	NA	NA	12.7805	NA	NA	NA	NA	NA	NA	NA	NA	NA	12.339	NA	NA	NA	NA	NA	NA	NA	NA	NA	NA	NA	NA	NA	NA	NA	12.632	NA	NA	NA	NA	NA	NA	NA	NA	NA	NA	NA
Kif13b_A0A286YCV9_S1409_1	Kif13b	A0A286YCV9	S1409	1	12.4193	13.5556	NA	14.4239	NA	NA	NA	NA	NA	NA	NA	13.5212	13.9807	NA	13.7168	NA	NA	13.209	NA	NA	NA	13.1899	12.8772	12.8209	13.1715	NA	13.1022	12.6398	12.5514	NA	13.8303	NA	12.6682	NA	13.3247	13.7294	13.5269	NA	NA	NA	NA	NA	NA	NA	NA
Trappc8_A0A286YCX6_S273_1	Trappc8	A0A286YCX6	S273	1	NA	NA	NA	NA	NA	NA	NA	NA	NA	NA	NA	NA	NA	NA	NA	NA	15.0397	NA	NA	NA	14.6321	NA	14.9775	NA	NA	NA	14.8107	NA	NA	NA	15.2394	16.1186	16.0169	NA	NA	NA	16.5896	NA	NA	NA	NA	NA	NA	NA	NA
Trappc8_A0A286YCX6_S1090_1	Trappc8	A0A286YCX6	S1090	1	14.4815	14.8188	14.0945	14.7976	14.817	15.8233	14.5273	13.6964	14.2968	14.9679	14.4522	NA	NA	14.0951	14.6897	NA	NA	14.6551	14.6755	16.2613	15.1625	15.1632	14.6548	15.0759	15.722	14.9248	15.1147	14.7046	14.6954	15.0363	13.4945	NA	12.849	15.6782	13.7681	NA	12.8651	14.3388	15.3233	13.9345	13.1505	14.2481	14.3936	14.6724	13.8543
Gm7324_A0A2I3BRL8_S205_1	Gm7324	A0A2I3BRL8	S205	1	19.373	19.2986	19.4011	19.4729	19.2949	19.4363	19.0523	19.3159	19.332	19.5199	19.503	19.4432	19.3939	19.4324	19.3777	19.5632	19.4633	19.5677	19.6509	19.7163	19.8353	19.3378	19.4679	19.4859	19.7391	19.6888	19.362	19.5061	19.7183	19.7834	19.4636	19.5298	19.3235	19.4551	19.4773	19.3096	19.2515	19.5955	18.8756	18.9867	18.8053	18.4867	18.6558	18.8074	18.7021
Rbmxl1_Q91VM5_S205_1	Rbmxl1	Q91VM5	S205	1	19.373	19.2986	19.4011	19.4729	19.2949	19.4363	19.0523	19.3159	19.332	19.5199	19.503	19.4432	19.3939	19.4324	19.3777	19.5632	19.4633	19.5677	19.6509	19.7163	19.8353	19.3378	19.4679	19.4859	19.7391	19.6888	19.362	19.5061	19.7183	19.7834	19.4636	19.5298	19.3235	19.4551	19.4773	19.3096	19.2515	19.5955	18.8756	18.9867	18.8053	18.4867	18.6558	18.8074	18.7021
Gm7324_A0A2I3BRL8_T163_1	Gm7324	A0A2I3BRL8	T163	1	18.3833	18.2151	18.1844	18.4727	18.3884	18.2554	18.1565	17.9317	18.2119	18.3099	18.3661	18.2182	18.3738	18.3051	18.3107	18.3954	18.4441	18.5475	18.3184	18.5102	18.3663	18.4574	18.1784	18.2612	18.318	18.5574	18.6624	18.2363	18.1096	18.6916	18.5645	18.4536	18.0603	18.4613	18.5948	18.5184	18.0883	18.6419	18.0172	17.8623	17.8468	17.621	17.8549	17.6991	15.3276
Rbmxl1_Q91VM5_T163_1	Rbmxl1	Q91VM5	T163	1	18.3833	18.2151	18.1844	18.4727	18.3884	18.2554	18.1565	17.9317	18.2119	18.3099	18.3661	18.2182	18.3738	18.3051	18.3107	18.3954	18.4441	18.5475	18.3184	18.5102	18.3663	18.4574	18.1784	18.2612	18.318	18.5574	18.6624	18.2363	18.1096	18.6916	18.5645	18.4536	18.0603	18.4613	18.5948	18.5184	18.0883	18.6419	18.0172	17.8623	17.8468	17.621	17.8549	17.6991	15.3276
Gm7324_A0A2I3BRL8_S162_1	Gm7324	A0A2I3BRL8	S162	1	NA	NA	NA	16.1064	NA	NA	NA	15.7879	NA	NA	NA	NA	NA	NA	NA	NA	NA	NA	NA	NA	16.1408	NA	NA	NA	NA	NA	16.0978	16.4746	15.6864	NA	NA	NA	NA	NA	NA	NA	NA	NA	NA	15.1169	NA	NA	NA	NA	NA
Rbmxl1_Q91VM5_S162_1	Rbmxl1	Q91VM5	S162	1	NA	NA	NA	16.1064	NA	NA	NA	15.7879	NA	NA	NA	NA	NA	NA	NA	NA	NA	NA	NA	NA	16.1408	NA	NA	NA	NA	NA	16.0978	16.4746	15.6864	NA	NA	NA	NA	NA	NA	NA	NA	NA	NA	15.1169	NA	NA	NA	NA	NA
Gm7324_A0A2I3BRL8_S247_1	Gm7324	A0A2I3BRL8	S247	1	NA	15.1249	NA	NA	NA	NA	NA	13.7747	NA	NA	NA	NA	16.4701	NA	NA	14.0158	NA	NA	NA	NA	NA	NA	NA	NA	NA	NA	NA	NA	NA	NA	NA	NA	NA	NA	NA	NA	NA	NA	NA	NA	NA	NA	NA	NA	NA
Rbmxl1_Q91VM5_S247_1	Rbmxl1	Q91VM5	S247	1	NA	15.1249	NA	NA	NA	NA	NA	13.7747	NA	NA	NA	NA	16.4701	NA	NA	14.0158	NA	NA	NA	NA	NA	NA	NA	NA	NA	NA	NA	NA	NA	NA	NA	NA	NA	NA	NA	NA	NA	NA	NA	NA	NA	NA	NA	NA	NA
Gm7324_A0A2I3BRL8_S246_1	Gm7324	A0A2I3BRL8	S246	1	NA	NA	NA	NA	NA	NA	NA	NA	NA	14.6198	NA	15.8899	16.0086	NA	15.6675	15.0927	14.7954	NA	14.4703	NA	NA	NA	NA	NA	NA	NA	NA	NA	NA	14.9388	NA	15.7334	NA	13.9274	15.7019	12.0058	NA	15.0809	NA	NA	NA	NA	NA	15.6096	NA
Rbmxl1_Q91VM5_S246_1	Rbmxl1	Q91VM5	S246	1	NA	NA	NA	NA	NA	NA	NA	NA	NA	14.6198	NA	15.8899	16.0086	NA	15.6675	15.0927	14.7954	NA	14.4703	NA	NA	NA	NA	NA	NA	NA	NA	NA	NA	14.9388	NA	15.7334	NA	13.9274	15.7019	12.0058	NA	15.0809	NA	NA	NA	NA	NA	15.6096	NA
Gm7324_A0A2I3BRL8_S248_1	Gm7324	A0A2I3BRL8	S248	1	NA	13.8899	14.133	14.0482	NA	13.8251	NA	NA	NA	NA	NA	NA	NA	NA	NA	NA	NA	14.2479	NA	NA	NA	NA	NA	NA	NA	NA	NA	NA	NA	NA	NA	NA	NA	NA	NA	NA	NA	NA	13.9892	NA	NA	14.3555	NA	NA	13.1825
Rbmxl1_Q91VM5_S248_1	Rbmxl1	Q91VM5	S248	1	NA	13.8899	14.133	14.0482	NA	13.8251	NA	NA	NA	NA	NA	NA	NA	NA	NA	NA	NA	14.2479	NA	NA	NA	NA	NA	NA	NA	NA	NA	NA	NA	NA	NA	NA	NA	NA	NA	NA	NA	NA	13.9892	NA	NA	14.3555	NA	NA	13.1825
Gm7324_A0A2I3BRL8_S244_1	Gm7324	A0A2I3BRL8	S244	1	NA	NA	NA	NA	NA	NA	NA	NA	NA	NA	NA	NA	NA	NA	NA	NA	NA	NA	NA	NA	NA	NA	NA	NA	13.4404	13.9971	NA	NA	13.2613	NA	13.5797	NA	12.1778	NA	NA	NA	NA	NA	NA	NA	NA	NA	NA	NA	NA
Rbmxl1_Q91VM5_S244_1	Rbmxl1	Q91VM5	S244	1	NA	NA	NA	NA	NA	NA	NA	NA	NA	NA	NA	NA	NA	NA	NA	NA	NA	NA	NA	NA	NA	NA	NA	NA	13.4404	13.9971	NA	NA	13.2613	NA	13.5797	NA	12.1778	NA	NA	NA	NA	NA	NA	NA	NA	NA	NA	NA	NA
Gm7324_A0A2I3BRL8_Y243_1	Gm7324	A0A2I3BRL8	Y243	1	NA	NA	NA	NA	NA	NA	NA	NA	NA	12.3881	NA	13.9104	NA	NA	NA	NA	14.7136	NA	NA	NA	NA	13.1044	NA	NA	NA	NA	12.7658	NA	13.8557	NA	NA	14.5948	NA	NA	15.7161	NA	13.2811	16.3792	NA	NA	NA	NA	12.8211	NA	NA
Rbmxl1_Q91VM5_Y243_1	Rbmxl1	Q91VM5	Y243	1	NA	NA	NA	NA	NA	NA	NA	NA	NA	12.3881	NA	13.9104	NA	NA	NA	NA	14.7136	NA	NA	NA	NA	13.1044	NA	NA	NA	NA	12.7658	NA	13.8557	NA	NA	14.5948	NA	NA	15.7161	NA	13.2811	16.3792	NA	NA	NA	NA	12.8211	NA	NA
Gm7324_A0A2I3BRL8_S88_1	Gm7324	A0A2I3BRL8	S88	1	13.5126	14.5926	NA	14.1593	NA	13.719	14.133	14.0394	14.2907	13.5005	13.049	13.548	NA	NA	NA	13.8722	12.9841	NA	NA	14.8864	14.4854	NA	14.7182	13.5303	14.1781	13.6842	14.6366	14.8101	13.482	14.4661	NA	NA	NA	14.4109	NA	NA	NA	14.0649	13.3319	NA	NA	NA	NA	12.5756	12.5066
Rbmxl1_Q91VM5_S88_1	Rbmxl1	Q91VM5	S88	1	13.5126	14.5926	NA	14.1593	NA	13.719	14.133	14.0394	14.2907	13.5005	13.049	13.548	NA	NA	NA	13.8722	12.9841	NA	NA	14.8864	14.4854	NA	14.7182	13.5303	14.1781	13.6842	14.6366	14.8101	13.482	14.4661	NA	NA	NA	14.4109	NA	NA	NA	14.0649	13.3319	NA	NA	NA	NA	12.5756	12.5066
Gm7324_A0A2I3BRL8_T85_1	Gm7324	A0A2I3BRL8	T85	1	NA	12.583	12.262	NA	12.0776	12.2611	NA	NA	NA	13.1609	12.7567	NA	12.8773	13.1568	12.8898	12.7341	NA	12.5193	12.9554	NA	NA	NA	NA	13.0716	12.6916	NA	NA	NA	12.9886	NA	13.0898	12.7081	13.1175	NA	NA	12.7125	13.0857	NA	12.4752	12.9083	12.3587	12.5486	12.2587	12.1531	12.4777
Rbmxl1_Q91VM5_T85_1	Rbmxl1	Q91VM5	T85	1	NA	12.583	12.262	NA	12.0776	12.2611	NA	NA	NA	13.1609	12.7567	NA	12.8773	13.1568	12.8898	12.7341	NA	12.5193	12.9554	NA	NA	NA	NA	13.0716	12.6916	NA	NA	NA	12.9886	NA	13.0898	12.7081	13.1175	NA	NA	12.7125	13.0857	NA	12.4752	12.9083	12.3587	12.5486	12.2587	12.1531	12.4777
Gm7324_A0A2I3BRL8_S91_1	Gm7324	A0A2I3BRL8	S91	1	NA	NA	13.6678	NA	NA	13.7133	NA	NA	NA	NA	13.049	12.618	NA	13.4167	NA	13.5436	NA	NA	NA	NA	NA	NA	NA	13.532	NA	NA	NA	NA	NA	13.9748	13.3221	13.4916	NA	NA	13.469	12.4748	NA	13.1386	NA	NA	NA	12.1994	NA	NA	NA
Rbmxl1_Q91VM5_S91_1	Rbmxl1	Q91VM5	S91	1	NA	NA	13.6678	NA	NA	13.7133	NA	NA	NA	NA	13.049	12.618	NA	13.4167	NA	13.5436	NA	NA	NA	NA	NA	NA	NA	13.532	NA	NA	NA	NA	NA	13.9748	13.3221	13.4916	NA	NA	13.469	12.4748	NA	13.1386	NA	NA	NA	12.1994	NA	NA	NA
Gm7324_A0A2I3BRL8_S323_1	Gm7324	A0A2I3BRL8	S323	1	NA	NA	NA	NA	NA	13.2466	NA	NA	NA	NA	13.7244	NA	NA	NA	13.5498	NA	NA	NA	NA	NA	13.5944	NA	NA	NA	13.0904	NA	13.6808	NA	NA	NA	NA	13.962	NA	NA	NA	14.4936	NA	NA	NA	NA	NA	NA	NA	NA	NA
Rbmxl1_Q91VM5_S323_1	Rbmxl1	Q91VM5	S323	1	NA	NA	NA	NA	NA	13.2466	NA	NA	NA	NA	13.7244	NA	NA	NA	13.5498	NA	NA	NA	NA	NA	13.5944	NA	NA	NA	13.0904	NA	13.6808	NA	NA	NA	NA	13.962	NA	NA	NA	14.4936	NA	NA	NA	NA	NA	NA	NA	NA	NA
Gm7324_A0A2I3BRL8_Y203_1	Gm7324	A0A2I3BRL8	Y203	1	14.2761	NA	14.4057	NA	NA	13.6808	NA	NA	NA	NA	NA	NA	NA	NA	NA	NA	NA	13.968	NA	NA	NA	NA	NA	NA	NA	13.7555	NA	NA	NA	NA	NA	NA	NA	NA	NA	NA	NA	NA	NA	13.445	NA	NA	11.5671	11.6876	NA
Rbmxl1_Q91VM5_Y203_1	Rbmxl1	Q91VM5	Y203	1	14.2761	NA	14.4057	NA	NA	13.6808	NA	NA	NA	NA	NA	NA	NA	NA	NA	NA	NA	13.968	NA	NA	NA	NA	NA	NA	NA	13.7555	NA	NA	NA	NA	NA	NA	NA	NA	NA	NA	NA	NA	NA	13.445	NA	NA	11.5671	11.6876	NA
Qser1_A0A338P6K9_S595_1	Qser1	A0A338P6K9	S595	1	NA	NA	14.8065	13.8107	11.791	NA	13.8243	13.8657	14.043	14.0625	14.4873	13.2643	NA	14.4409	NA	NA	NA	14.4774	13.725	15.3068	13.7483	NA	13.9847	NA	13.5198	NA	13.1325	13.0952	12.1841	13.2978	13.8558	13.2712	NA	13.2015	13.7357	13.9117	NA	NA	12.6793	13.2357	13.2283	14.094	13.4892	13.8125	13.8153
Abi3bp_A0A338P6S8_S1334_1	Abi3bp	A0A338P6S8	S1334	1	17.3458	NA	16.9925	17.5868	17.5069	NA	NA	NA	16.9446	17.0204	17.2316	17.3857	17.3894	16.8155	NA	17.155	17.3872	17.3866	NA	16.84	17.0974	16.7311	16.8242	17.0098	16.9526	16.677	17.2095	16.8673	NA	NA	17.147	NA	17.0314	16.8541	17.0965	NA	16.3999	16.8192	17.0141	NA	16.5902	NA	NA	NA	16.4497
Abi3bp_A0A338P6S8_T1330_1	Abi3bp	A0A338P6S8	T1330	1	NA	17.157	NA	NA	NA	17.1925	16.9375	17.0145	NA	NA	NA	NA	NA	NA	16.8369	NA	NA	NA	16.8647	NA	NA	NA	NA	NA	NA	NA	NA	NA	16.6418	16.6994	NA	16.7347	NA	NA	NA	16.2331	NA	NA	NA	16.6399	NA	16.236	16.5157	16.5462	NA
Mybpc1_A0A571BEN1_S165_1	Mybpc1	A0A571BEN1	S165	1	21.697	21.7824	21.5612	22.17	22.0085	21.6268	22.2537	22.3511	21.9385	21.9272	21.7966	22.0068	21.9581	21.9083	21.8858	21.816	21.9771	21.952	21.6339	20.9132	20.9908	21.5827	21.9106	22.2181	21.4956	20.8542	21.9427	21.9559	21.8279	22.4607	21.7783	22.1218	22.2201	22.1111	21.926	21.9768	22.261	21.9834	21.3836	21.6114	21.5703	22.4255	22.2523	22.3912	22.4225
Mybpc1_A0A571BEN1_S178_1	Mybpc1	A0A571BEN1	S178	1	15.8466	16.1284	15.4871	15.9843	15.9177	16.1051	15.6152	16.0733	15.6452	15.9044	16.1108	16.2059	16.0809	15.6793	15.5169	15.9533	15.978	15.7275	15.3252	15.0013	15.5465	15.2644	15.0759	15.7183	15.2912	15.8096	15.7375	15.8005	15.2453	16.0449	15.6411	15.919	16.015	15.9725	15.3607	16.0318	16.1425	15.4148	14.9579	15.6972	15.2109	15.9131	15.4086	15.7671	15.5096
Mybpc1_A0A571BEN1_T570_1	Mybpc1	A0A571BEN1	T570	1	NA	NA	14.9461	NA	NA	NA	NA	15.099	15.9989	16.2482	16.2032	NA	15.9255	NA	NA	NA	NA	15.1671	NA	16.5316	NA	NA	16.1641	15.5619	NA	NA	NA	NA	NA	NA	NA	NA	NA	15.5612	NA	NA	NA	NA	NA	NA	NA	NA	NA	NA	NA
Mybpc1_A0A571BEN1_Y565_1	Mybpc1	A0A571BEN1	Y565	1	NA	NA	NA	NA	15.4617	NA	NA	NA	17.15	17.6896	17.5987	17.2367	NA	NA	17.4128	17.1689	17.6048	NA	NA	18.4194	NA	NA	17.9581	18.4615	NA	NA	NA	NA	NA	18.2432	NA	18.1761	18.1957	NA	16.2118	17.9724	18.4006	NA	17.2981	NA	NA	NA	NA	14.0558	NA
Mybpc1_A0A571BEN1_S564_1	Mybpc1	A0A571BEN1	S564	1	16.4138	16.885	17.2647	19.2948	16.5677	17.0544	19.5103	16.5585	NA	16.3259	NA	NA	14.8256	NA	NA	NA	17.659	NA	17.0431	17.1633	18.8661	19.1701	NA	16.7709	18.6898	17.7903	18.5621	18.8506	18.1002	17.3598	17.5737	17.4228	18.1108	19.2599	17.0581	17.1122	17.2143	16.9866	14.6798	16.9608	NA	17.4536	16.5977	NA	17.7004
Mybpc1_A0A571BEN1_Y793_1	Mybpc1	A0A571BEN1	Y793	1	15.1101	NA	14.4453	14.2983	14.9519	13.2302	NA	NA	14.7513	14.3833	16.7184	14.716	16.5758	NA	NA	14.4645	14.8141	15.182	14.0624	14.1782	NA	NA	NA	14.0148	NA	14.5482	14.1029	NA	14.3411	15.8073	14.151	NA	NA	16.1656	13.894	NA	NA	NA	NA	NA	14.2895	NA	NA	13.9509	NA
Mybpc1_A0A571BEN1_S794_1	Mybpc1	A0A571BEN1	S794	1	14.8874	14.9035	14.3602	14.5224	14.5884	14.6898	14.7195	14.7025	14.116	12.8219	14.1535	15.1324	15.2536	12.9052	13.5656	14.629	15.2014	14.9033	14.5004	14.5785	14.3434	14.3528	14.1382	13.4051	14.3471	14.4742	14.4072	14.1948	12.9306	14.2571	14.8391	15.18	14.9446	13.8447	14.3311	14.6566	14.7328	14.74	14.1461	13.7559	14.1913	13.5811	14.3944	13.9325	14.0317
Mybpc1_A0A571BEN1_Y792_1	Mybpc1	A0A571BEN1	Y792	1	16.8538	17.1356	16.8735	15.7287	17.0117	16.8522	15.9358	16.4217	16.344	NA	NA	NA	NA	NA	NA	NA	NA	17.037	16.5204	16.5586	NA	15.4733	NA	NA	16.6102	NA	15.7868	16.0925	15.841	NA	NA	16.2946	16.5058	NA	NA	16.225	16.6153	NA	15.8179	16.0558	16.3824	NA	16.4034	NA	16.2283
Mybpc1_A0A571BEN1_S414_1	Mybpc1	A0A571BEN1	S414	1	16.6016	16.7266	16.7749	17.9369	16.9697	16.8935	18.2998	16.9495	16.0856	16.3084	16.2627	15.7731	15.3945	16.3179	16.047	16.1549	14.0673	16.6199	17.1488	17.5146	16.9202	17.443	16.8445	17.0354	17.2249	17.0923	16.6807	17.0255	16.561	14.9063	14.3388	16.0615	16.6764	13.9609	14.902	15.9863	16.5788	14.2836	16.394	17.0419	16.3259	16.4625	17.0457	16.2114	16.8355
Mybpc1_A0A571BEN1_S859_1	Mybpc1	A0A571BEN1	S859	1	14.8999	14.9127	15.0567	15.2911	14.8743	14.6483	15.6152	14.7545	14.3047	14.6633	14.1788	15.075	14.1884	14.1309	14.4359	13.8434	14.5753	12.7687	14.2132	14.9656	14.0594	14.1998	13.8693	15.1284	14.3569	14.0547	13.9848	14.1719	13.9303	13.8749	13.1594	14.2197	15.3191	14.2669	13.6502	13.974	15.1492	13.7796	12.9171	14.3023	14.3442	13.9089	15.1525	15.3379	15.2209
Mybpc1_A0A571BEN1_T861_1	Mybpc1	A0A571BEN1	T861	1	NA	NA	NA	NA	NA	NA	NA	NA	12.5269	NA	14.1352	NA	12.2288	NA	14.6425	NA	NA	12.5615	12.2374	NA	NA	NA	NA	NA	NA	NA	11.4751	NA	12.471	NA	NA	NA	NA	NA	NA	NA	NA	12.2676	14.2383	12.7481	14.221	NA	NA	NA	NA
Mybpc1_A0A571BEN1_T863_1	Mybpc1	A0A571BEN1	T863	1	NA	NA	13.0977	NA	NA	14.1038	NA	14.1143	13.913	NA	NA	NA	14.4405	14.2561	NA	14.0236	13.8266	13.9519	NA	NA	13.2731	NA	14.1601	NA	NA	13.4316	13.807	14.1454	13.8399	NA	13.7937	14.2356	NA	NA	13.704	13.7472	NA	13.806	NA	14.2092	NA	NA	NA	NA	NA
Mybpc1_A0A571BEN1_S598_1	Mybpc1	A0A571BEN1	S598	1	18.7618	18.7862	18.5281	18.1179	18.5839	18.4795	18.2824	18.3756	18.5696	18.5567	18.4889	18.533	18.6947	18.5045	18.4978	18.3824	18.6318	18.6019	18.29	18.0524	18.2315	18.1821	17.7491	18.2218	18.29	18.2495	18.3216	18.2907	18.2773	18.3581	18.1913	18.2079	18.0216	18.3444	18.1265	18.3581	17.9876	18.3163	17.578	17.6486	18.0382	17.9186	17.8623	18.0485	18.0675
Mybpc1_A0A571BEN1_S581_1	Mybpc1	A0A571BEN1	S581	1	13.9597	14.2978	13.7311	14.1561	14.0078	14.2896	13.1564	13.8001	13.5887	13.5398	13.0248	13.6325	14.0634	13.8204	13.5672	13.4877	15.2573	13.4546	14.1164	14.2435	14.5765	14.1155	13.825	14.3662	14.1018	14.0656	14.3034	14.079	13.1703	14.0044	14.2216	14.3245	14.4815	15.0083	14.5937	14.4555	14.0744	14.0727	13.7329	13.5276	14.236	13.9458	13.6556	13.8873	13.3845
Mybpc1_A0A571BEN1_T45_1	Mybpc1	A0A571BEN1	T45	1	14.5038	NA	15.1071	NA	NA	14.6043	14.3063	14.1689	13.7917	13.4683	15.9038	15.9462	15.654	NA	14.2946	15.8794	16.5146	14.6152	14.2635	14.7323	14.5942	14.515	14.5355	14.3056	14.2389	14.3883	14.9746	14.3906	14.8064	17.1785	18.0975	17.4604	14.4921	16.5602	18.2653	14.3171	15.5198	18.1713	14.529	14.759	14.8481	13.4723	NA	15.2705	14.256
Mybpc1_A0A571BEN1_S44_1	Mybpc1	A0A571BEN1	S44	1	NA	NA	NA	NA	NA	NA	NA	NA	NA	NA	NA	NA	NA	NA	NA	NA	NA	NA	NA	NA	NA	NA	NA	NA	NA	NA	NA	NA	NA	NA	NA	NA	NA	NA	NA	NA	NA	NA	NA	NA	NA	NA	NA	NA	NA
Mybpc1_A0A571BEN1_T771_1	Mybpc1	A0A571BEN1	T771	1	12.0151	13.474	13.4903	12.2667	15.9285	13.252	12.1056	12.7227	13.6485	13.8033	14.3629	14.2012	14.1863	13.4094	13.9136	14.0696	13.7233	14.7021	13.6624	13.7443	13.4375	13.7578	14.0435	14.1939	13.7494	13.6685	13.8682	11.581	13.9888	13.7833	14.301	14.1824	13.7141	14.3911	13.9734	13.9258	14.0266	14.2182	14.0231	13.6255	13.7628	13.6569	14.1104	14.1389	13.9588
Mybpc1_A0A571BEN1_T709_1	Mybpc1	A0A571BEN1	T709	1	15.1971	15.2131	15.2302	15.3232	14.9293	15.3138	15.0421	16.0278	15.945	15.6305	15.4609	16.0442	15.6122	15.477	NA	NA	13.4776	15.295	15.4964	14.8425	NA	15.4933	15.433	15.5604	14.1266	15.1526	15.5628	15.823	15.4363	14.637	15.3301	NA	14.7487	NA	14.8529	20.3022	15.3438	14.9021	15.3245	14.6669	15.0293	15.2871	14.9779	15.1831	15.0089
Mybpc1_A0A571BEN1_S719_1	Mybpc1	A0A571BEN1	S719	1	NA	NA	NA	NA	NA	NA	NA	NA	NA	NA	NA	NA	NA	NA	NA	NA	NA	NA	NA	NA	NA	NA	NA	NA	NA	NA	NA	NA	NA	NA	NA	NA	NA	NA	NA	NA	NA	NA	NA	NA	NA	NA	NA	NA	NA
Mybpc1_A0A571BEN1_S715_1	Mybpc1	A0A571BEN1	S715	1	23.9529	24.0278	24.0149	23.2372	23.6591	24.0377	23.263	24.4889	23.9495	24.1178	23.8246	22.9381	23.1212	23.8512	24.0896	23.5219	23.3607	23.6605	23.8281	23.7204	23.0283	23.55	23.2166	22.9593	23.3856	23.7972	23.4891	22.8656	23.5985	23.1191	24.0411	23.6354	23.6655	23.8446	23.794	23.5259	23.8451	23.4893	23.5433	22.0861	24.1044	24.0293	24.1131	24.0087	23.0753
Mybpc1_A0A571BEN1_T717_2	Mybpc1	A0A571BEN1	T717	2	NA	16.3858	NA	15.415	NA	14.7348	NA	NA	NA	18.3057	12.8193	NA	NA	NA	15.4843	17.1812	12.8478	NA	NA	NA	NA	NA	17.3419	10.4752	11.9956	NA	NA	12.642	17.4018	15.8238	17.7247	15.5244	NA	17.5783	NA	NA	17.9714	NA	NA	NA	19.3273	NA	16.1745	16.2374	NA
Mybpc1_A0A571BEN1_S715_2	Mybpc1	A0A571BEN1	S715	2	18.164	18.6342	18.2439	17.6207	18.4507	18.7094	17.8561	18.48	18.2933	18.6104	17.9308	17.5599	17.7223	18.1193	17.8629	18.2201	18.341	17.682	17.9459	17.6663	17.8079	17.794	17.5931	17.9892	17.4655	17.6795	18.9186	17.7957	17.4018	15.8238	17.7247	18.288	17.9515	17.8684	17.8909	17.3031	17.9714	17.6668	19.2463	18.2113	19.5706	19.3028	19.5925	19.5429	18.891
Mybpc1_A0A571BEN1_S720_2	Mybpc1	A0A571BEN1	S720	2	NA	18.2933	NA	NA	NA	NA	NA	NA	NA	NA	NA	NA	NA	NA	17.5548	NA	NA	17.1879	17.6573	NA	17.49	NA	NA	NA	NA	NA	NA	NA	NA	NA	NA	NA	NA	NA	NA	NA	NA	NA	NA	18.0457	NA	19.0998	19.3777	19.3174	NA
Mybpc1_A0A571BEN1_S719_2	Mybpc1	A0A571BEN1	S719	2	18.164	NA	18.2439	17.2682	18.4507	18.6146	17.8561	18.48	18.2933	16.2173	17.9308	17.5599	17.7223	18.1193	NA	15.2591	18.341	15.2931	15.4827	17.6663	15.4698	17.794	14.9476	17.9892	17.4655	17.6795	18.21	17.7546	NA	NA	NA	18.0582	17.9515	15.4115	17.8909	17.0273	NA	17.4763	19.2463	15.0059	16.883	16.3734	15.1132	15.0221	18.891
Mybpc1_A0A571BEN1_T709_2	Mybpc1	A0A571BEN1	T709	2	NA	NA	NA	NA	NA	NA	NA	NA	NA	NA	12.8193	NA	NA	NA	NA	16.8426	12.8478	NA	NA	NA	NA	NA	NA	10.4752	11.9956	NA	17.553	NA	NA	NA	NA	NA	NA	NA	NA	14.7802	NA	NA	NA	NA	NA	NA	NA	NA	NA
Mybpc1_A0A571BEN1_T705_2	Mybpc1	A0A571BEN1	T705	2	NA	NA	NA	NA	NA	NA	NA	NA	NA	NA	NA	NA	NA	NA	NA	NA	NA	14.3469	NA	NA	NA	NA	NA	NA	NA	NA	NA	NA	NA	NA	NA	NA	NA	NA	NA	NA	NA	14.652	NA	NA	NA	NA	NA	NA	NA
Mybpc1_A0A571BEN1_T705_1	Mybpc1	A0A571BEN1	T705	1	NA	NA	15.1974	NA	NA	NA	NA	NA	NA	15.643	NA	NA	14.9098	NA	NA	14.4789	15.4449	14.4277	NA	NA	NA	14.2866	15.6009	16.0113	NA	NA	NA	NA	14.841	NA	16.0495	NA	16.3142	NA	NA	15.5106	16.2982	15.7099	NA	NA	NA	NA	NA	NA	NA
Mybpc1_A0A571BEN1_T717_1	Mybpc1	A0A571BEN1	T717	1	NA	NA	NA	NA	NA	NA	NA	NA	NA	NA	NA	NA	NA	NA	NA	NA	NA	NA	NA	NA	NA	NA	NA	NA	NA	NA	NA	NA	NA	NA	NA	NA	NA	NA	NA	NA	NA	NA	NA	NA	NA	NA	NA	NA	NA
Mybpc1_A0A571BEN1_S302_1	Mybpc1	A0A571BEN1	S302	1	18.1157	20.4847	NA	15.9847	20.1175	NA	NA	NA	NA	NA	19.7297	NA	18.3698	NA	NA	NA	NA	16.9956	17.467	NA	19.9554	19.6783	NA	NA	NA	NA	NA	NA	NA	NA	NA	NA	18.8044	NA	NA	NA	NA	NA	16.8594	16.789	NA	NA	16.703	20.4391	20.0932
Mybpc1_A0A571BEN1_T304_1	Mybpc1	A0A571BEN1	T304	1	19.997	NA	19.7231	19.6441	NA	19.8748	19.7545	19.739	19.3915	19.8976	NA	19.573	19.5907	19.012	19.6389	19.5066	19.3008	19.4238	NA	19.7289	NA	NA	19.5418	19.5477	19.5806	19.6066	19.695	19.8835	19.9363	19.7253	19.4721	19.7941	20.1245	20.063	19.7287	19.568	20.1325	19.4582	20.1186	20.1152	20.0936	19.9178	20.2253	NA	NA
Mybpc1_A0A571BEN1_Y309_1	Mybpc1	A0A571BEN1	Y309	1	NA	NA	NA	NA	NA	NA	NA	NA	17.6793	NA	NA	NA	NA	NA	NA	NA	NA	NA	NA	NA	NA	NA	NA	NA	NA	NA	NA	NA	NA	NA	NA	NA	NA	NA	NA	NA	NA	NA	NA	NA	NA	NA	NA	NA	NA
Mybpc1_A0A571BEN1_S307_1	Mybpc1	A0A571BEN1	S307	1	NA	NA	17.4507	17.659	NA	17.6659	17.7413	17.8943	17.3939	17.6841	17.734	17.7592	NA	17.3775	17.6319	17.4165	17.7225	NA	NA	16.9174	NA	17.1631	NA	17.6433	17.0837	16.3476	17.4306	17.8315	NA	17.5874	17.5292	18.0658	NA	18.1985	17.8948	17.9378	18.3421	17.6618	NA	NA	16.6134	16.8447	NA	NA	NA
Mybpc1_A0A571BEN1_S568_1	Mybpc1	A0A571BEN1	S568	1	16.3382	NA	17.2238	NA	NA	16.9673	NA	NA	NA	NA	NA	NA	NA	17.9135	NA	NA	18.1949	NA	17.6716	NA	NA	NA	NA	NA	NA	17.9825	NA	NA	18.0173	NA	18.3895	NA	NA	NA	NA	NA	NA	NA	NA	NA	17.1141	NA	NA	17.041	NA
Mybpc1_A0A571BEN1_T427_1	Mybpc1	A0A571BEN1	T427	1	15.161	NA	15.4623	NA	15.2608	NA	14.2814	14.9471	15.9289	15.7435	15.3445	NA	NA	15.4817	NA	15.27	NA	NA	15.1925	14.8851	NA	NA	14.7655	15.2298	NA	14.8372	NA	14.6995	15.3924	NA	NA	NA	NA	NA	NA	NA	NA	NA	NA	13.6117	14.3203	NA	NA	NA	NA
Mybpc1_A0A571BEN1_T150_1	Mybpc1	A0A571BEN1	T150	1	18.3105	20.6942	18.2148	19.2797	18.3362	21.134	NA	18.3805	NA	NA	NA	NA	NA	NA	18.5266	NA	NA	17.5933	NA	NA	17.3414	NA	18.706	19.5833	NA	NA	NA	NA	19.0709	NA	NA	18.6127	17.6687	NA	NA	NA	NA	NA	20.3855	NA	NA	NA	17.3849	NA	NA
Mybpc1_A0A571BEN1_S149_1	Mybpc1	A0A571BEN1	S149	1	21.3804	20.3234	20.8948	19.895	21.2306	20.581	20.8376	20.867	19.6227	19.4098	19.679	19.8838	19.8469	19.3127	19.0392	18.4343	17.9344	20.7942	20.7473	20.5029	20.4892	20.6633	19.1161	19.5739	20.2865	20.4125	20.0149	20.713	19.4488	20.246	18.8904	19.7947	20.6245	20.0189	19.3396	18.1255	20.937	18.5076	19.7967	21.0703	21.0643	20.5366	21.1319	20.9667	20.5646
Mybpc1_A0A571BEN1_T153_1	Mybpc1	A0A571BEN1	T153	1	17.7088	19.4893	19.8624	18.5864	12.1327	NA	16.6589	15.9107	17.881	18.3796	18.6971	18.2521	18.7101	15.9878	15.198	18.244	18.61	18.5237	19.2494	17.4037	17.7893	17.7694	17.7687	18.5056	NA	13.3433	17.89	16.7868	18.819	18.751	17.4455	16.9342	19.406	18.8189	16.3856	18.5912	NA	17.6099	NA	17.841	17.7747	17.8383	17.8448	NA	18.9586
Mybpc1_A0A571BEN1_T152_1	Mybpc1	A0A571BEN1	T152	1	19.5341	18.8927	NA	16.8272	20.9281	20.6808	21.0637	20.366	18.6466	17.9098	18.9789	NA	17.5893	20.4032	19.3791	NA	18.179	17.6759	18.2194	17.994	15.8931	18.208	NA	16.9886	18.9533	18.551	18.0807	18.3725	NA	18.2271	17.3137	17.7691	18.4607	18.8979	17.265	17.915	20.6543	18.453	20.0446	18.2097	19.0028	18.2145	NA	19.9625	18.2454
Mybpc1_A0A571BEN1_T152_2	Mybpc1	A0A571BEN1	T152	2	15.9637	16.1604	14.7413	16.1666	16.2417	17.2442	13.3987	15.7866	13.9794	16.051	16.1375	15.7304	16.1538	15.9597	15.634	15.826	16.0478	16.112	15.5922	15.1339	14.7488	15.9318	14.2048	15.0906	12.9557	NA	15.2093	15.4814	15.8347	15.6988	14.3045	15.6997	14.3869	15.576	13.9144	14.3197	15.0383	14.8017	15.4881	11.9979	14.2919	15.6844	14.1506	15.0573	12.8837
Mybpc1_A0A571BEN1_S149_2	Mybpc1	A0A571BEN1	S149	2	NA	16.2293	NA	NA	NA	16.6287	16.2738	NA	NA	NA	14.8689	NA	NA	13.3571	NA	14.9764	NA	NA	16.2739	13.0045	NA	NA	NA	NA	14.2716	NA	NA	12.0614	NA	NA	NA	13.8754	NA	13.8912	NA	13.5886	13.7789	NA	15.7326	NA	14.0331	12.0798	NA	14.7837	NA
Mybpc1_A0A571BEN1_T150_2	Mybpc1	A0A571BEN1	T150	2	15.6966	11.7675	10.1164	14.0255	11.0753	NA	NA	13.7754	15.6787	14.5671	14.9552	13.7067	15.287	14.1764	15.0966	13.4528	15.4103	13.8764	13.5435	15.1313	13.5083	NA	12.7313	12.9415	NA	NA	12.8345	13.2327	14.2188	14.1292	NA	14.484	14.039	15.0339	13.7497	NA	14.3644	14.9423	15.5419	NA	13.7615	15.533	NA	15.3978	14.7735
Mybpc1_A0A571BEN1_T153_2	Mybpc1	A0A571BEN1	T153	2	16.8363	16.2403	14.7986	16.4614	16.2814	15.7184	16.4582	16.1063	16.066	15.4128	16.1002	16.0476	16.7846	16.1307	16.3902	16.2716	14.5625	16.3897	15.3504	14.1486	12.1316	15.9318	13.5607	14.722	14.7588	NA	15.4637	15.8642	16.242	15.106	14.3045	15.4684	15.2234	15.3483	14.8344	15	16.0701	15.8737	17.1763	11.9979	14.9933	15.8896	14.1506	16.1551	15.1181
Mybpc1_A0A571BEN1_S141_1	Mybpc1	A0A571BEN1	S141	1	NA	NA	NA	NA	NA	NA	NA	NA	NA	NA	15.1241	NA	NA	NA	NA	NA	NA	NA	NA	NA	NA	NA	NA	NA	NA	NA	NA	NA	NA	12.6336	NA	NA	NA	NA	NA	NA	NA	NA	14.3909	NA	NA	NA	NA	NA	11.6313
Mybpc1_A0A571BEN1_S141_2	Mybpc1	A0A571BEN1	S141	2	NA	NA	NA	NA	NA	NA	NA	NA	NA	NA	NA	NA	NA	NA	NA	NA	NA	NA	NA	NA	13.4758	NA	NA	NA	NA	NA	NA	NA	NA	NA	NA	NA	NA	NA	NA	NA	NA	NA	NA	NA	NA	NA	NA	NA	NA
Mybpc1_A0A571BEN1_S557_1	Mybpc1	A0A571BEN1	S557	1	18.748	18.6944	18.4531	18.1349	18.5815	18.484	18.3195	18.3239	18.3285	18.2551	18.2639	18.4703	18.5812	18.2909	18.1965	18.3581	18.5494	18.5098	18.2689	18.0788	17.9857	17.987	17.838	18.0437	18.3001	18.1247	18.0594	17.9596	17.8142	18.3424	18.0925	18.2502	17.8084	18.2249	18.0257	18.1102	17.7658	18.2975	17.6755	17.7917	17.8815	17.6678	17.8989	17.8371	17.7244
Mybpc1_A0A571BEN1_T521_1	Mybpc1	A0A571BEN1	T521	1	17.6	17.5749	17.3361	14.0279	17.5346	14.4281	14.3687	17.9359	17.8738	17.5979	17.5729	NA	17.677	17.5914	17.3757	17.5466	17.4628	14.2895	16.9864	17.5312	13.3092	17.1636	16.9218	17.2373	NA	12.9798	NA	NA	17.4003	13.9271	17.1552	17.4989	17.2849	13.7417	NA	17.0165	NA	17.0526	17.1668	17.4068	17.3509	13.1308	13.2343	13.5969	16.9763
Mybpc1_A0A571BEN1_T523_1	Mybpc1	A0A571BEN1	T523	1	NA	NA	14.6549	17.1133	11.7736	17.4031	17.5117	NA	15.2374	NA	12.6648	17.6141	12.8339	NA	NA	12.2663	NA	17.8223	11.6074	NA	17.4078	NA	12.649	12.7257	17.0028	17.4418	17.4068	14.7346	NA	17.6953	10.9148	NA	NA	15.3508	17.181	NA	NA	11.4143	NA	NA	12.7899	17.1049	17.388	17.4499	NA
Mybpc1_A0A571BEN1_S528_1	Mybpc1	A0A571BEN1	S528	1	15.0694	NA	12.1021	NA	NA	NA	NA	NA	NA	NA	14.5168	NA	NA	NA	NA	12.5753	NA	14.1207	12.4262	13.8863	13.6793	NA	NA	NA	14.223	NA	NA	NA	NA	NA	NA	NA	NA	NA	NA	NA	14.5837	NA	NA	NA	NA	NA	NA	NA	NA
Mybpc1_A0A571BEN1_S397_1	Mybpc1	A0A571BEN1	S397	1	14.3818	14.8804	16.0128	15.6223	16.0051	16.0765	16.2972	15.636	15.6842	15.764	16.2572	16.156	16.2669	15.6191	16.0992	16.2931	16.319	14.9585	16.056	16.28	16.5919	16.2278	15.5149	16.3176	15.2597	16.4864	16.4618	16.6262	15.9272	16.6078	15.6896	15.4311	15.4734	15.8726	15.8098	16.216	16.4175	16.4833	16.6387	16.6489	15.5526	15.9994	16.7551	15.1618	14.3477
Mybpc1_A0A571BEN1_S410_1	Mybpc1	A0A571BEN1	S410	1	15.5973	13.7595	NA	14.6666	15.4013	NA	15.289	15.3727	15.1038	14.2301	15.237	14.3749	14.297	15.0394	15.1396	15.0206	14.3765	15.5814	13.2386	NA	15.4446	15.5426	15.3716	15.2277	13.7348	14.9914	15.5411	15.7195	15.2329	15.2546	15.2801	14.3831	14.8015	15.4073	15.126	14.1142	15.0333	15.363	14.3235	12.358	15.3969	15.331	NA	15.7347	14.64
Mybpc1_A0A571BEN1_T405_1	Mybpc1	A0A571BEN1	T405	1	NA	NA	NA	NA	NA	NA	NA	NA	NA	NA	NA	NA	NA	NA	NA	NA	NA	NA	NA	NA	NA	NA	NA	NA	NA	NA	NA	NA	NA	NA	NA	NA	NA	NA	NA	NA	NA	NA	NA	NA	NA	NA	NA	NA	NA
Mybpc1_A0A571BEN1_S409_1	Mybpc1	A0A571BEN1	S409	1	NA	NA	NA	NA	NA	NA	NA	NA	NA	NA	NA	14.1973	14.53	NA	NA	NA	14.5848	NA	14.5006	NA	NA	NA	NA	NA	NA	NA	NA	NA	NA	NA	NA	NA	NA	NA	NA	13.7951	NA	NA	NA	NA	NA	NA	NA	NA	NA
Mybpc1_A0A571BEN1_S353_1	Mybpc1	A0A571BEN1	S353	1	21.1091	21.8886	21.3889	21.609	21.0326	21.3505	21.8231	21.8432	21.5091	21.4276	21.3866	21.5641	21.3439	21.2912	21.282	21.2365	21.3799	20.445	20.7711	21.1192	21.9477	22.0014	21.6153	21.1046	20.8102	21.1855	21.1573	21.9682	21.4486	22.1457	21.4305	21.869	22.0059	21.7903	21.8436	22.1208	21.9397	21.5595	20.3436	21.7457	20.7199	21.4701	20.9159	21.394	21.3382
Mybpc1_A0A571BEN1_S319_1	Mybpc1	A0A571BEN1	S319	1	15.3558	15.4766	14.9927	15.2045	15.4557	14.9844	15.1704	15.9497	15.6348	15.386	15.661	15.3271	15.0857	15.5831	15.0868	15.4129	15.899	15.11	15.6609	15.2558	15.4493	15.0401	15.7404	15.8642	15.4799	15.1859	15.0139	15.452	15.6038	15.0042	15.1358	15.3444	15.288	15.5459	15.2991	14.8549	15.0579	15.1732	15.1894	15.5461	15.6487	15.3792	15.7464	15.3355	15.4701
Mybpc1_A0A571BEN1_S282_1	Mybpc1	A0A571BEN1	S282	1	14.217	14.0101	13.3187	13.9099	14.029	13.749	13.6139	14.0023	13.7665	13.5005	13.8298	12.6798	12.4068	13.8228	13.8983	14.0502	13.5236	14.1145	14.0491	13.965	14.4377	14.0201	14.0574	14.5378	14.383	14.7869	14.5033	14.5827	14.4279	14.8561	14.0225	13.0572	13.9467	14.784	13.8678	14.0316	13.5745	14.3793	13.4175	13.7704	13.415	13.4566	13.8892	13.4324	13.4565
Mybpc1_A0A571BEN1_T283_1	Mybpc1	A0A571BEN1	T283	1	14.2234	14.3473	13.7458	13.5877	13.7824	13.9712	13.8869	13.976	13.8859	13.6569	NA	NA	14.3297	13.1931	13.6514	NA	14.1909	14.2279	NA	14.1105	NA	13.8937	13.4853	14.2647	13.7692	14.3961	14.529	NA	13.9866	13.9418	13.9852	14.4512	13.9076	14.1007	13.9648	14.412	NA	NA	13.2108	13.4431	13.9087	13.4813	13.941	13.6988	13.6155
Mybpc1_A0A571BEN1_Y971_1	Mybpc1	A0A571BEN1	Y971	1	13.3336	13.5282	13.0624	12.7781	13.5823	13.6036	13.3645	13.7285	13.72	13.8888	NA	13.7151	13.5992	13.4776	13.0104	12.9097	NA	13.8452	13.4773	12.3607	12.5338	12.1772	12.915	12.2341	12.5801	NA	12.5148	NA	12.7815	12.5043	12.3088	NA	NA	12.7605	NA	13.0909	NA	12.4305	12.1842	11.8479	12.0447	NA	NA	11.8031	12.8674
Mybpc1_A0A571BEN1_S500_1	Mybpc1	A0A571BEN1	S500	1	13.9064	14.1927	14.2812	13.5776	14.0854	14.3511	14.1137	NA	13.1996	13.2629	12.671	12.141	12.3331	13.1989	13.4781	12.472	12.031	13.6062	13.6915	12.9569	12.1735	13.3573	NA	12.5913	12.0217	12.5463	12.1949	13.277	13.2067	13.2507	13.9162	13.7836	13.6591	11.932	13.1681	12.7691	13.918	13.3423	13.8721	NA	NA	NA	13.7905	13.5986	13.5679
Mybpc1_A0A571BEN1_S1079_1	Mybpc1	A0A571BEN1	S1079	1	NA	14.6487	13.4564	12.1432	13.9348	14.2634	13.1549	12.9306	11.7302	NA	NA	NA	NA	12.6387	NA	10.1336	NA	13.8806	13.4394	NA	13.2333	11.9411	NA	9.71785	12.6252	12.8725	NA	13.6827	NA	12.6774	NA	NA	11.5836	12.0002	11.2106	NA	13.3836	NA	14.0922	13.7893	13.6119	NA	13.7203	NA	13.1034
Mybpc1_A0A571BEN1_S706_1	Mybpc1	A0A571BEN1	S706	1	NA	NA	NA	NA	NA	NA	NA	NA	NA	NA	NA	NA	NA	NA	NA	NA	NA	NA	NA	NA	NA	NA	NA	NA	NA	NA	NA	NA	NA	NA	NA	14.9965	NA	NA	NA	NA	NA	NA	NA	NA	NA	NA	NA	NA	NA
Mybpc1_A0A571BEN1_T393_1	Mybpc1	A0A571BEN1	T393	1	13.2763	12.4439	11.3526	11.3952	12.959	12.3666	NA	12.4342	NA	NA	NA	NA	NA	NA	NA	NA	13.0208	13.0036	12.9232	12.567	11.6948	11.764	NA	NA	13.157	12.1723	11.4479	11.0871	NA	NA	NA	NA	NA	NA	NA	NA	NA	NA	NA	NA	11.0153	NA	9.85396	NA	NA
Neb_A0A571BF58_S7447_1	Neb	A0A571BF58	S7447	1	22.6191	22.7303	22.0471	21.9752	22.9079	22.8674	22.6107	22.87	21.7513	22.2486	22.7138	22.5405	22.7144	22.3217	22.3904	22.5209	22.7254	22.8193	22.5851	22.3482	22.0841	21.9936	21.872	22.4703	22.8908	22.8231	22.1733	22.1533	22.0978	22.3189	22.2386	22.5319	22.7305	22.507	22.2106	22.9061	22.9284	22.792	22.3842	22.2525	22.2258	22.126	22.3969	22.3145	22.1594
Neb_A0A571BF58_S7463_4	Neb	A0A571BF58	S7463	4	22.2537	22.1508	22.4013	22.1292	21.8938	22.0411	22.164	22.1986	22.231	22.2539	21.5527	21.8751	21.8422	21.9776	21.8531	21.912	22.4804	22.2113	21.9906	22.2875	21.7234	22.2459	21.426	21.7132	22.1941	21.8105	21.7246	21.7366	21.3749	21.2715	21.6204	21.9853	22.5272	21.4255	21.7212	22.5706	21.7635	22.3233	22.1634	22.3948	22.6941	22.1413	22.6666	22.3158	22.8354
Neb_A0A571BF58_S7460_4	Neb	A0A571BF58	S7460	4	22.3511	22.2157	22.4735	22.1292	22.0641	22.1171	22.2375	22.286	22.4426	22.3287	21.8249	22.0465	22.2673	22.1365	22.0927	22.1329	22.6477	22.2834	22.285	22.355	21.9423	22.1436	21.6358	21.7812	22.262	21.9182	21.9668	22.0392	21.5509	21.3681	21.6916	22.0633	22.5783	21.3661	21.8478	22.7049	21.8792	22.4283	22.2248	22.4622	22.8207	22.2649	22.6666	22.3158	22.7237
Neb_A0A571BF58_S7457_4	Neb	A0A571BF58	S7457	4	22.3102	22.2157	22.4264	22.1292	21.9654	22.0614	22.2006	22.2282	22.3618	22.286	21.8249	21.7137	22.0474	22.0594	22.0927	22.1329	22.2989	22.2834	22.1567	22.3256	21.9423	22.1998	21.6139	21.7918	22.2247	21.8552	21.9151	21.6902	21.5099	22.4438	21.5571	22.0416	22.0579	21.3223	21.6762	22.2556	21.8639	21.5465	22.1826	22.4622	22.8207	22.2649	22.5433	22.3158	22.7059
Neb_A0A571BF58_T7454_4	Neb	A0A571BF58	T7454	4	17.5479	NA	NA	NA	18.1458	NA	NA	NA	17.2709	NA	NA	19.7669	19.7816	17.8732	NA	18.1079	20.1979	NA	19.358	NA	NA	17.5375	15.5833	NA	16.2418	NA	NA	19.8204	16.3945	NA	18.2023	NA	NA	17.5689	17.6736	19.2129	NA	18.5518	NA	NA	18.6189	NA	19.0561	NA	19.6183
Neb_A0A571BF58_T7453_4	Neb	A0A571BF58	T7453	4	17.5479	17.2301	NA	NA	18.1458	NA	NA	NA	NA	NA	NA	NA	19.6353	17.8732	NA	NA	19.335	NA	15.2267	NA	NA	NA	NA	NA	NA	NA	NA	19.8204	NA	NA	NA	NA	NA	16.302	18.2332	17.7626	NA	17.2988	NA	NA	NA	NA	NA	NA	19.6183
Neb_A0A571BF58_T7464_4	Neb	A0A571BF58	T7464	4	19.628	17.3111	18.5795	18.3103	NA	17.395	16.9274	18.9024	20.1343	18.4807	18.6363	18.8878	19.7669	18.1234	19.4514	19.2674	19.7575	NA	18.5295	18.4204	18.8651	19.9278	18.1461	14.7067	18.5152	17.3707	19.408	19.1805	17.9265	21.5976	18.2023	18.3959	20.8549	16.302	19.3584	21.0593	17.164	21.6575	18.3701	NA	19.3981	17.249	19.0561	NA	20.3352
Neb_A0A571BF58_S7456_4	Neb	A0A571BF58	S7456	4	19.4356	19.5534	19.9788	19.0325	19.4412	19.8345	19.8194	20.0455	20.6345	19.9577	19.2848	19.7669	19.1664	19.5342	19.3849	19.6991	20.4946	19.9011	19.5059	19.555	19.1142	20.0122	18.7511	19.1621	19.6651	18.6144	19.5689	18.6968	18.4286	21.6806	18.4199	19.265	17.736	18.6215	18.4735	18.9062	19.2891	18.841	18.3494	20.1094	20.1949	18.6589	NA	19.3212	20.0457
Neb_A0A571BF58_S7460_2	Neb	A0A571BF58	S7460	2	20.781	20.9061	20.81	20.6311	20.5913	20.7063	20.7561	20.926	20.8263	21.0786	20.8384	20.6186	20.5861	20.8045	20.9873	20.779	20.8096	21.0665	20.5946	20.4994	20.439	20.5128	20.6447	20.734	20.449	20.4979	20.6	20.5703	20.6409	19.6161	20.7477	20.5167	20.5323	20.6215	20.6252	20.5976	20.3962	20.466	20.7831	21.093	21.1269	21.0042	21.2672	20.9897	21.0922
Neb_A0A571BF58_S7457_2	Neb	A0A571BF58	S7457	2	20.2129	20.4738	20.1685	19.8779	20.2488	20.1209	20.1622	20.2253	20.0826	20.5309	20.4292	20.0033	20.1315	20.283	20.5531	20.1945	20.3527	20.1882	20.0226	19.9659	20.0279	19.8836	20.0082	20.374	20.0657	20.1596	20.19	19.9662	19.9529	19.7603	20.0891	19.9273	19.7627	20.1222	19.9716	19.7544	19.7116	19.9981	20.1991	20.306	20.3527	20.3062	20.6804	20.2733	20.4084
Neb_A0A571BF58_S7463_2	Neb	A0A571BF58	S7463	2	19.3916	19.7379	19.6672	19.5716	19.2237	19.5138	19.7681	19.8022	19.7187	NA	19.4494	NA	NA	19.5924	19.6339	19.4537	16.488	20.0689	19.3297	19.4775	19.3237	16.5314	19.3408	19.5191	19.2153	19.2137	19.4627	19.4883	19.2424	18.8204	19.5259	19.4424	19.4871	19.1488	19.4129	19.4216	19.2795	NA	19.6616	19.843	20.1647	19.8347	16.9427	19.9435	20.1579
Neb_A0A571BF58_T7454_2	Neb	A0A571BF58	T7454	2	NA	NA	NA	NA	NA	NA	NA	NA	NA	16.1289	16.9888	16.7662	16.9364	NA	17.1203	NA	NA	NA	NA	NA	NA	NA	NA	17.0057	NA	NA	15.2266	NA	NA	16.3662	16.7413	NA	17.1392	16.7388	16.7318	NA	NA	16.8645	NA	NA	NA	NA	NA	NA	NA
Neb_A0A571BF58_T7464_2	Neb	A0A571BF58	T7464	2	NA	NA	NA	NA	NA	NA	NA	NA	NA	19.5566	NA	19.3548	19.3506	NA	NA	NA	19.4525	NA	NA	NA	NA	19.3256	NA	NA	NA	NA	NA	NA	NA	18.8204	NA	16.663	NA	NA	NA	NA	NA	18.9895	NA	NA	NA	NA	19.8869	NA	NA
Neb_A0A571BF58_T7450_2	Neb	A0A571BF58	T7450	2	19.4867	19.4875	18.7841	18.6756	NA	19.2579	19.1652	19.3108	18.3393	18.8653	19.1805	19.2566	19.173	18.6281	18.5686	18.9879	19.3055	19.4376	18.7524	18.6717	18.8663	18.5658	NA	19.2221	19.2316	18.9683	18.8652	18.6172	18.5948	18.3945	18.4302	NA	NA	18.9121	18.6983	19.4871	NA	19.0062	18.9379	18.9041	18.9566	19.293	19.3051	19.3675	19.3742
Neb_A0A571BF58_S7447_2	Neb	A0A571BF58	S7447	2	19.4867	19.4875	18.7841	18.6756	NA	19.2579	19.1652	19.3108	18.3393	18.8653	19.9928	19.2566	19.173	18.6281	18.5686	18.9879	19.3055	19.4376	18.7524	18.6717	18.8663	18.5658	18.0562	19.2221	19.2316	18.9683	18.8652	18.6172	18.5948	18.3945	18.4302	18.7239	18.7627	18.9121	18.6983	19.4871	18.8379	19.0062	18.9379	18.9041	18.9566	19.293	19.3051	19.3675	19.3742
Neb_A0A571BF58_S7456_2	Neb	A0A571BF58	S7456	2	16.6278	17.1074	NA	16.8562	16.6775	NA	16.9831	17.1728	16.7968	NA	16.9056	NA	16.8441	16.8356	16.9972	16.8575	16.9502	16.5864	17.7171	16.5797	17.1585	15.0309	16.2725	16.4242	16.7693	17.1379	16.9864	17.6301	NA	NA	NA	16.6873	16.7192	NA	NA	NA	16.8113	NA	16.0002	NA	NA	16.9696	NA	NA	16.8988
Neb_A0A571BF58_T7453_2	Neb	A0A571BF58	T7453	2	NA	NA	NA	NA	NA	NA	NA	NA	NA	NA	18.777	NA	NA	NA	NA	NA	NA	NA	NA	NA	NA	NA	18.0562	NA	NA	NA	NA	NA	NA	NA	NA	18.7239	19.1682	NA	NA	NA	18.8379	NA	NA	NA	NA	NA	NA	NA	NA
Neb_A0A571BF58_S7463_1	Neb	A0A571BF58	S7463	1	NA	NA	16.7201	17.6377	NA	NA	NA	NA	NA	NA	NA	NA	NA	NA	NA	NA	NA	NA	NA	NA	17.097	NA	NA	17.8466	NA	16.8143	NA	NA	NA	NA	NA	NA	NA	NA	NA	NA	NA	NA	NA	NA	NA	NA	NA	NA	17.3202
Neb_A0A571BF58_S7457_1	Neb	A0A571BF58	S7457	1	18.5621	18.3933	18.0614	18.098	18.2704	18.3204	18.4533	18.374	18.0423	18.5537	18.0848	18.4291	18.5055	18.1905	18.3264	18.134	18.4307	16.1819	18.3613	18.3849	18.3511	17.8565	18.0925	18.3347	18.6103	18.5081	18.2636	18.0385	17.7754	18.0689	18.4078	18.5269	14.3832	18.1012	18.3791	18.7791	18.3665	18.4366	17.9827	18.0282	18.0476	17.8037	18.5043	18.2419	18.2711
Neb_A0A571BF58_S7447_4	Neb	A0A571BF58	S7447	4	NA	17.2301	NA	NA	NA	NA	NA	NA	NA	NA	NA	NA	NA	NA	NA	NA	NA	NA	15.2267	NA	NA	NA	NA	NA	16.2418	14.7016	NA	NA	NA	NA	NA	NA	NA	NA	NA	NA	NA	NA	13.5328	NA	NA	NA	NA	NA	NA
Neb_A0A571BF58_T7450_4	Neb	A0A571BF58	T7450	4	NA	17.2301	NA	NA	NA	NA	NA	NA	NA	NA	NA	NA	NA	NA	NA	NA	NA	NA	NA	NA	NA	NA	NA	NA	16.2418	14.7016	NA	NA	NA	NA	NA	NA	NA	NA	NA	NA	NA	NA	13.5328	NA	NA	NA	NA	NA	NA
Neb_A0A571BF58_S7460_1	Neb	A0A571BF58	S7460	1	16.4173	NA	16.3737	15.9541	16.4553	16.3537	NA	16.1406	15.9353	16.3649	16.34	NA	NA	16.3057	16.28	16.332	16.4618	16.8471	16.39	NA	16.1742	16.1261	16.1054	16.1933	NA	16.2522	15.9632	15.9768	16.2159	15.6027	16.0606	NA	16.1482	16.0113	NA	16.3245	15.8033	16.1397	15.8555	15.9054	NA	NA	NA	16.1556	16.3722
Neb_A0A571BF58_T7464_1	Neb	A0A571BF58	T7464	1	NA	NA	NA	NA	NA	NA	NA	NA	NA	NA	NA	NA	NA	NA	NA	NA	NA	NA	NA	16.1958	NA	NA	NA	NA	NA	NA	NA	NA	NA	NA	NA	NA	NA	NA	NA	NA	NA	NA	NA	NA	NA	NA	NA	NA	NA
Neb_A0A571BF58_S7397_2	Neb	A0A571BF58	S7397	2	23.3931	23.4242	23.575	23.7549	23.2903	23.3597	24.2467	23.7504	23.0343	23.0632	22.8494	23.0274	22.6128	23.0455	22.7592	22.8434	22.7567	22.9432	23.0359	23.2418	23.6282	23.9628	22.7048	23.2293	23.1858	23.1953	24.0129	23.1997	22.9066	23.0377	22.5118	22.6587	22.6794	22.7456	22.5851	22.5142	22.4465	22.9991	23.6219	23.7444	24.1689	23.7427	23.9873	24.4279	24.2975
Neb_A0A571BF58_S7394_2	Neb	A0A571BF58	S7394	2	23.3118	23.3634	23.4903	23.6804	23.1798	23.3205	24.1957	23.678	22.9139	22.9644	22.7366	22.9416	22.5265	22.9013	22.7087	22.7089	22.6698	22.7588	22.9422	23.202	23.558	23.9353	22.5923	23.1315	23.1395	23.1459	23.9863	23.1193	22.8116	22.9667	22.4334	22.5729	22.5544	22.6874	22.5156	22.4114	22.277	22.8732	23.5314	23.6736	24.0933	23.644	23.9558	24.3702	24.2343
Neb_A0A571BF58_S7397_1	Neb	A0A571BF58	S7397	1	22.5121	22.211	21.7645	20.8051	22.2109	22.1084	21.3085	21.2272	21.7993	22.1094	22.3793	22.5451	22.3105	22.0396	22.2183	22.3021	22.3741	22.2313	22.1013	21.7376	22.2541	21.547	20.8465	21.6568	22.0825	22.0541	21.8498	20.9968	21.9769	21.7945	22.2238	22.7449	22.6506	22.033	22.3583	22.7889	22.5183	22.4549	21.6626	22.0165	22.5732	21.8493	21.9503	22.5116	22.4812
Neb_A0A571BF58_S7399_1	Neb	A0A571BF58	S7399	1	NA	NA	NA	17.66	NA	NA	NA	NA	NA	NA	NA	NA	NA	NA	NA	NA	NA	17.598	NA	16.9719	NA	NA	NA	NA	NA	NA	NA	17.2544	NA	NA	NA	NA	NA	17.2747	NA	NA	NA	NA	16.8767	NA	NA	NA	NA	NA	NA
Neb_A0A571BF58_S7392_2	Neb	A0A571BF58	S7392	2	18.3899	NA	17.6423	18.0125	18.5055	NA	18.1906	18.3588	17.9042	17.6771	17.9414	17.5036	NA	18.2504	17.8971	18.4805	NA	17.7974	NA	NA	NA	NA	17.5515	17.957	NA	NA	NA	17.5531	17.63	17.194	16.6098	16.1045	17.6986	18.0869	NA	16.8169	18.1228	18.5415	NA	18.1602	18.9549	18.7418	NA	18.7121	18.6155
Neb_A0A571BF58_S7399_2	Neb	A0A571BF58	S7399	2	17.9878	18.8243	18.9545	18.7736	18.551	18.1406	18.5794	18.4357	18.7552	18.4994	18.2724	18.2334	18.5073	18.9659	NA	18.2143	18.6606	18.4367	19.0453	18.0432	18.1515	18.2349	18.2919	18.8762	18.2024	18.301	18.2409	18.3318	18.1864	18.0102	17.7231	18.2511	18.3961	NA	18.1739	18.1765	18.4102	18.2846	19.5822	18.5361	18.7963	18.9044	18.4554	18.7951	18.8792
Neb_A0A571BF58_S7392_1	Neb	A0A571BF58	S7392	1	18.6724	19.3111	18.0956	17.7837	NA	19.2843	19.5315	19.2943	18.4791	17.7871	18.3204	17.9231	17.9899	19.4847	18.6341	17.9791	18.2025	NA	17.4017	18.0059	NA	18.2235	18.2447	18.367	18.1793	18.664	18.1285	18.0783	18.2508	18.2963	17.7092	18.0261	18.2556	18.4413	17.8418	18.4307	18.9617	18.2505	18.4389	18.2023	18.8156	18.6257	18.139	19.0344	18.2815
Neb_A0A571BF58_S7394_1	Neb	A0A571BF58	S7394	1	NA	18.0671	18.4028	18.3065	18.9428	18.613	18.6268	18.7028	18.2898	18.4495	18.0821	NA	17.9337	18.746	18.1406	NA	17.6889	18.523	NA	NA	18.4234	18.6797	18.8857	18.7683	18.4981	18.4369	18.2702	18.6075	18.6524	18.3955	18.0683	NA	18.3471	18.7712	18.1495	17.8014	18.3854	18.3373	18.2497	18.3994	18.2264	18.2962	18.4237	NA	17.8613
Neb_A0A571BF58_S7419_2	Neb	A0A571BF58	S7419	2	18.828	18.5856	18.7462	18.9128	18.4747	NA	19.1232	18.9302	18.8001	19.03	18.7946	18.4241	18.6413	19.0195	18.7753	18.5825	18.9484	18.6196	19.2123	18.8213	19.4197	14.7623	14.0803	19.0595	18.4958	18.45	18.8318	15.0243	NA	18.2194	18.6904	18.2661	18.7882	18.769	18.2404	18.906	16.9489	19.132	18.483	18.6738	NA	18.7149	18.8853	18.8294	14.9387
Neb_A0A571BF58_S7416_2	Neb	A0A571BF58	S7416	2	NA	NA	NA	18.8137	NA	19.0106	19.0522	NA	NA	NA	NA	NA	NA	19.0195	NA	NA	NA	NA	17.6972	18.8213	19.4897	18.8247	18.8903	18.9916	NA	18.45	18.7409	18.7975	18.8786	18.1991	18.6455	NA	17.7993	18.0841	NA	NA	17.5011	19.2264	17.5346	18.6738	19.2122	NA	17.7559	NA	19.3967
Neb_A0A571BF58_T7417_2	Neb	A0A571BF58	T7417	2	18.7408	18.5856	18.7308	NA	18.4747	19.0106	NA	NA	18.7087	18.9333	18.7085	18.3418	18.565	NA	18.6911	18.4604	18.7482	18.6196	18.591	NA	19.3727	18.8247	18.8903	NA	18.4958	NA	NA	18.7975	18.8786	NA	NA	18.1186	NA	17.3651	18.1601	17.9832	17.5011	19.0894	19.0854	NA	19.2122	18.6075	19.4284	18.7609	19.3967
Neb_A0A571BF58_Y7418_2	Neb	A0A571BF58	Y7418	2	14.7367	NA	12.1865	14.9991	NA	NA	14.7433	18.9302	14.7747	15.0832	14.6859	14.2511	14.362	NA	14.636	14.9598	16	NA	NA	NA	14.4574	14.7623	14.0803	14.6155	NA	NA	14.797	15.0243	NA	12.0575	13.6621	14.9034	17.777	NA	14.0337	17.8245	16.9489	14.0263	NA	NA	NA	14.9132	NA	14.3993	14.9387
Neb_A0A571BF58_S4020_1	Neb	A0A571BF58	S4020	1	20.2542	20.3234	20.0437	19.7418	20.1217	20.1225	20.1396	20.0415	20.0117	20.1088	19.9668	19.9202	20.1539	19.9914	20.0194	19.9016	20.0688	20.2866	20.1596	19.9444	20.0467	20.2222	20.0525	20.3372	20.1494	20.1903	20.3976	20.2808	20.11	20.3594	19.8764	19.953	19.8962	20.2783	19.9027	19.8351	19.8612	20.1376	19.7665	19.6701	20.0117	19.5731	20.1012	19.8651	19.6635
Neb_A0A571BF58_T7346_1	Neb	A0A571BF58	T7346	1	18.7233	18.7791	18.7006	18.707	18.2667	18.0895	18.7573	18.3881	18.1056	18.7634	18.5376	18.9101	18.6543	17.9455	18.4925	18.6198	18.5367	18.6393	18.4489	18.8075	18.3142	18.1148	18.087	18.3629	18.6056	18.6378	18.5939	18.3171	18.4275	18.2521	18.5401	18.8314	18.6881	18.3618	18.553	18.7383	18.5302	18.3161	17.9079	18.1211	18.5673	17.9377	18.3751	18.4276	18.4297
Neb_A0A571BF58_S1099_1	Neb	A0A571BF58	S1099	1	17.7338	17.9988	17.7237	17.5452	17.7458	17.9231	17.9932	17.9893	17.466	17.7029	17.736	17.8671	17.8556	17.4295	17.702	17.8745	17.9802	17.7352	17.7944	17.464	18.0715	17.8432	17.4916	17.8118	17.5585	17.8389	17.8911	18.6042	17.774	18.2259	17.9505	18.0308	17.5667	18.029	17.9499	17.7298	17.5548	18.0883	17.8364	17.449	17.8383	17.6206	17.9733	17.7721	17.4433
Neb_A0A571BF58_S1343_1	Neb	A0A571BF58	S1343	1	17.5485	17.8137	17.4333	17.4779	17.5919	17.7595	17.8489	17.8202	17.3796	17.6307	17.4867	17.5176	17.5909	17.3806	17.5877	17.6285	17.6909	17.5992	17.7067	17.3932	17.5344	17.7261	17.3679	17.7543	17.3734	17.6935	17.7856	18.2659	17.6551	18.103	17.5933	17.6358	17.3682	17.8501	17.7639	17.6204	17.4018	17.7814	17.5877	17.2665	17.664	17.4491	17.7556	17.5592	17.3022
Neb_A0A571BF58_S1587_1	Neb	A0A571BF58	S1587	1	17.5485	17.8137	17.4333	17.4779	17.5919	17.7595	17.8489	17.8202	17.3796	17.6307	17.4867	17.5176	17.5909	17.3806	17.5877	17.6285	17.6909	17.5992	17.7067	17.3932	17.5344	17.7261	17.3679	17.7543	17.3734	17.6935	17.7856	18.2659	17.6551	18.103	17.5933	17.6358	17.3682	17.8501	17.7639	17.6204	17.4018	17.7814	17.5877	17.2665	17.664	17.4491	17.7556	17.5592	17.3022
Neb_A0A571BF58_S4263_1	Neb	A0A571BF58	S4263	1	17.5485	17.8137	17.4333	17.4779	17.5919	17.7595	17.8489	17.8202	17.3796	17.6307	17.4867	17.5176	17.5909	17.3806	17.5877	17.6285	17.6909	17.5992	17.7067	17.3932	17.5344	17.7261	17.3679	17.7543	17.3734	17.6935	17.7856	18.2659	17.6551	18.103	17.5933	17.6358	17.3682	17.8501	17.7639	17.6204	17.4018	17.7814	17.5877	17.2665	17.664	17.4491	17.7556	17.5592	17.3022
Neb_A0A571BF58_S6386_1	Neb	A0A571BF58	S6386	1	17.5859	17.2359	17.5972	17.7993	17.8094	17.9738	18.298	17.9527	17.4462	17.631	17.6379	17.5958	17.3824	17.7283	17.5678	17.2903	17.3495	17.6326	17.604	17.9185	17.6031	17.7175	17.8843	18.0724	17.7004	17.5944	17.5742	17.9337	18.0475	17.9788	17.8164	17.7401	18.0358	17.9137	17.4165	17.508	17.9942	17.737	17.7487	17.5773	17.7171	17.612	17.9648	17.783	17.5948
Neb_A0A571BF58_S6918_1	Neb	A0A571BF58	S6918	1	16.2729	16.5983	15.5074	16.2259	16.4792	16.3376	16.4144	16.5245	16.4161	16.3125	NA	16.4688	16.5204	16.3538	16.1493	15.6826	16.3234	16.1309	16.1983	16.2396	16.0734	16.5712	15.9751	16.3333	16.3924	16.1373	16.1123	16.3997	16.4289	16.6192	15.988	16.5507	16.5499	16.3034	16.2353	16.6273	16.6521	15.9686	NA	16.0082	16.1795	NA	16.1795	16.203	NA
Neb_A0A571BF58_T6921_1	Neb	A0A571BF58	T6921	1	NA	NA	NA	NA	NA	NA	NA	NA	NA	NA	15.5478	NA	NA	NA	NA	NA	NA	NA	NA	NA	NA	NA	NA	NA	NA	NA	NA	NA	NA	NA	NA	NA	NA	NA	NA	NA	NA	NA	NA	NA	NA	15.1375	NA	NA	NA
Neb_A0A571BF58_S5480_1	Neb	A0A571BF58	S5480	1	17.3883	17.6657	NA	16.6199	17.2902	17.3584	16.9639	17.0825	16.4905	16.7355	16.6874	16.6777	16.9412	16.4224	16.5983	16.6694	17.0234	17.1973	17.2841	16.6056	16.9985	16.9999	16.3712	16.9376	17.1216	NA	17.0214	17.6189	16.6067	17.4256	16.4212	16.825	16.7624	17.2615	16.8603	16.8968	16.8341	16.9704	17.2536	17.0256	17.5225	17.0441	17.6757	17.1896	16.9514
Neb_A0A571BF58_S5362_1	Neb	A0A571BF58	S5362	1	15.8563	15.8055	15.4568	15.4602	15.5821	15.6602	15.7201	15.5435	15.4438	15.4464	15.5562	15.7307	15.7938	15.2549	15.1968	15.49	15.7347	15.8892	15.3408	15.8636	15.5212	15.5366	NA	15.6817	15.4685	15.5122	15.4062	15.6217	15.5056	15.5081	15.5998	15.7262	15.8541	15.6314	15.7399	15.6087	15.5822	15.6156	NA	15.6246	15.892	NA	16.0381	15.9354	15.8784
Neb_A0A571BF58_S7321_1	Neb	A0A571BF58	S7321	1	15.937	15.8791	15.4798	15.9072	15.4634	15.8099	15.7293	15.5606	15.5474	15.7571	15.6354	15.6206	15.4786	15.4428	NA	15.4576	15.5725	15.9682	15.7839	15.7668	15.7824	15.9844	15.4815	15.763	15.7366	15.8575	15.9173	15.766	15.9901	15.2676	15.5466	16.1536	16.1989	15.902	15.7031	16.1222	16.1271	15.2206	15.3365	15.8411	16.0476	15.6992	15.7805	16.0546	15.8206
Neb_A0A571BF58_S6703_1	Neb	A0A571BF58	S6703	1	15.2704	15.9338	15.5483	15.6449	15.6346	15.5279	15.8646	15.8841	15.6033	15.6844	15.95	14.7871	14.8444	15.5877	15.6353	15.8386	15.7734	15.7823	15.9207	15.688	15.5614	15.9218	15.7586	16.0616	15.6463	15.691	15.9503	16.2906	16.0789	16.5463	15.7033	15.4131	16.5729	16.1995	15.5686	15.4378	16.1175	16.2448	15.1865	15.5598	15.2534	15.2566	15.5993	15.4218	15.2575
Neb_A0A571BF58_S1754_1	Neb	A0A571BF58	S1754	1	15.4293	15.5357	14.6	15.1246	15.3001	15.2298	15.7235	15.5122	15.4474	15.2734	14.3129	13.8639	14.0713	NA	15.189	13.7471	13.7129	15.3203	14.5108	14.3113	15.139	15.401	14.7589	15.5346	15.467	14.4455	15.3459	15.3733	15.3613	14.3485	14.3143	15.5719	15.0599	15.2234	15.1952	14.445	14.7254	15.1659	13.5754	15.4264	14.5465	15.3933	15.4493	15.7603	15.6097
Neb_A0A571BF58_T1753_1	Neb	A0A571BF58	T1753	1	NA	NA	13.8784	NA	NA	NA	NA	NA	NA	NA	13.848	13.9475	13.7756	15.0125	NA	NA	13.3102	NA	14.0184	NA	NA	NA	14.3204	14.3795	NA	14.1385	NA	NA	NA	13.84	NA	NA	NA	NA	NA	14.0331	14.0396	NA	NA	NA	14.7016	14.3439	NA	NA	NA
Neb_A0A571BF58_S3988_1	Neb	A0A571BF58	S3988	1	15.5992	15.6566	15.4171	15.8717	15.4354	15.7527	15.7346	15.9482	15.6486	15.5551	15.5051	14.862	14.8738	15.4585	15.2619	14.6113	15.0516	15.8517	15.17	15.3173	15.6767	15.5089	15.3441	15.6651	15.116	15.3734	15.7041	15.768	15.3307	15.4757	15.0181	15.0905	15.3963	15.8068	14.7615	14.6108	15.4402	15.554	15.1491	15.2383	15.4116	15.2452	15.3608	15.2466	15.2682
Neb_A0A571BF58_S7408_2	Neb	A0A571BF58	S7408	2	24.0951	24.1041	24.0932	23.6888	23.8892	24.0137	23.8076	23.8588	23.5984	24.0585	23.8393	24.0145	24.1574	23.7412	23.8749	23.8131	24.1423	24.1654	23.9354	23.8858	23.8669	24.0382	23.8355	23.8623	24.0699	24.0025	23.9407	23.9815	23.8619	23.8784	23.9964	23.9283	24.0272	23.7459	23.9382	24.1301	23.8624	23.5315	23.8598	24.0413	24.033	23.897	24.4283	24.004	23.8954
Neb_A0A571BF58_S7405_2	Neb	A0A571BF58	S7405	2	24.0951	24.1041	24.0932	23.6888	23.8892	24.0137	23.8076	23.8588	23.5984	24.0585	23.8393	24.0145	24.1574	23.7412	23.8749	23.8131	24.1423	24.1946	23.9354	23.8858	23.8972	24.0382	23.8355	23.8709	24.0699	24.0025	23.9407	23.9815	23.8619	23.8784	23.9964	23.9283	24.0272	23.7459	23.9382	24.1301	23.8624	23.5315	23.8598	24.0413	24.033	23.897	24.4283	24.004	23.8954
Neb_A0A571BF58_S7408_4	Neb	A0A571BF58	S7408	4	20.0862	20.2047	20.5696	20.393	20.0203	20.3728	20.4647	20.4239	20.4051	20.6845	20.3324	20.3065	20.2852	20.5265	20.3431	20.0639	20.3155	20.4078	19.9231	20.2711	20.2474	20.5291	19.5479	20.2964	20.1153	20.2921	20.5468	20.407	20.2383	20.0514	19.9986	20.5148	20.3054	19.9241	20.1597	20.519	20.087	20.1437	22.3589	20.4575	20.605	20.5625	20.7918	20.5122	21.0687
Neb_A0A571BF58_S7405_4	Neb	A0A571BF58	S7405	4	20.18	20.2905	20.6371	20.4573	20.0937	20.4501	20.5322	20.4983	20.4781	20.7514	20.2542	20.3065	20.2852	20.5265	20.3431	20.0639	20.3155	20.4078	19.9231	20.2711	21.3147	21.3803	19.6623	20.3691	20.1975	20.2921	20.5468	20.4606	20.2996	20.1299	19.9986	20.5148	20.3054	19.9241	20.1597	20.519	20.2274	20.1437	23.2384	20.4575	20.8328	20.6304	20.7918	20.5122	21.1288
Neb_A0A571BF58_S7399_4	Neb	A0A571BF58	S7399	4	17.4475	17.0373	17.063	17.255	15.5199	15.0525	15.4004	16.6437	18.3335	16.2051	17.2611	16.8968	18.4273	16.9773	17.5386	17.6251	17.5721	18.5201	17.3972	16.5494	20.4124	20.3281	16.8229	17.4235	16.7096	14.9516	16.3878	17.0542	17.4931	16.6258	17.0357	17.9516	16.3888	17.8068	18.1335	18.2104	18.8615	17.812	23.0299	19.3175	18.3966	16.6951	17.4643	16.0557	15.8589
Neb_A0A571BF58_S7392_4	Neb	A0A571BF58	S7392	4	19.2913	19.3467	17.139	17.2685	19.163	18.94	10.182	16.6651	16.9413	16.1401	17.0495	17.4268	18.6994	16.9142	16.3693	16.8313	18.1542	18.0398	17.7259	16.5494	20.4221	20.2249	16.4335	16.6353	16.9626	15.0867	NA	17.1705	17.1821	NA	14.199	18.2465	18.9442	17.3746	17.9431	18.6183	18.9836	14.5194	21.5859	19.1168	16.6652	NA	19.084	15.3964	NA
Neb_A0A571BF58_S7397_4	Neb	A0A571BF58	S7397	4	20.18	20.3479	20.6537	20.5501	20.157	20.5405	20.5334	20.5641	20.7279	20.9456	20.3984	20.6777	20.7646	20.5265	20.4595	20.2252	20.5361	20.7058	19.9793	20.3461	20.2945	20.5825	19.8248	20.4458	20.2897	20.4305	20.5351	20.5012	20.39	20.7504	20.1955	20.9519	20.3054	20.08	20.7669	20.9208	20.6823	20.7155	21.6465	21.0033	20.8917	20.6939	20.8639	20.6716	21.1288
Neb_A0A571BF58_S7405_1	Neb	A0A571BF58	S7405	1	19.979	19.9742	19.4496	19.3288	19.8013	19.8141	19.4329	19.5087	19.1729	19.6394	19.6855	19.8388	19.707	19.5722	19.6805	19.65	19.011	20.0341	19.706	19.6605	19.5847	19.8635	19.654	19.6696	19.834	19.7187	19.8364	19.764	19.8292	19.9857	19.6616	19.7267	19.5654	19.2406	19.621	19.6569	19.9261	19.68	19.271	19.6753	19.5165	19.3154	19.6648	19.7009	19.4853
Neb_A0A571BF58_S7394_4	Neb	A0A571BF58	S7394	4	19.8336	20.1176	19.5057	19.4433	20.0941	20.2107	19.2853	19.6023	19.8937	20.0294	19.2076	19.9723	20.3936	19.2006	19.2975	18.9433	19.932	19.486	19.0424	18.9939	18.8	19.3446	17.3073	19.1159	19.1126	19.093	19.2018	19.1221	19.0712	20.0053	18.9375	20.2963	19.7422	18.6015	20.1942	20.2572	20.4299	19.8435	19.7518	20.111	19.6095	19.1721	19.9034	18.6633	19.2249
Neb_A0A571BF58_S7408_1	Neb	A0A571BF58	S7408	1	NA	14.3183	13.5651	14.8719	NA	NA	14.4795	13.2729	14.8568	19.6414	14.7068	19.4212	13.6861	13.7167	13.7917	19.5346	18.9853	NA	14.7598	NA	NA	NA	14.7949	14.3819	NA	13.3987	NA	NA	12.3203	NA	NA	20.004	19.7198	13.0471	15.5043	19.9286	NA	17.3372	13.0743	NA	NA	NA	8.93114	NA	NA
Neb_A0A571BF58_T39_1	Neb	A0A571BF58	T39	1	20.8745	NA	18.2026	NA	NA	NA	NA	21.2346	20.149	20.3582	NA	20.5988	18.3508	20.6881	20.3373	NA	NA	16.1781	NA	15.2973	18.1383	NA	20.6305	NA	NA	NA	18.3515	20.5173	20.4544	20.7632	17.8339	NA	20.8972	19.9051	18.0109	NA	NA	NA	NA	20.3459	20.0686	20.2736	20.4007	20.4875	20.3887
Neb_A0A571BF58_S40_1	Neb	A0A571BF58	S40	1	18.5478	20.8057	20.6735	21.2801	21.2784	21.2133	21.3245	18.9585	18.0192	18.7369	20.5337	NA	20.6388	18.9919	18.5086	20.2918	20.9196	21.3932	20.8994	20.836	20.2212	20.8375	18.6793	20.8518	21.0072	20.9521	20.6765	18.4336	18.1291	18.3279	20.2629	20.7795	NA	19.024	20.1675	20.488	20.443	20.8606	20.2302	18.2312	17.9771	NA	18.3973	NA	18.6367
Neb_A0A571BF58_Y42_1	Neb	A0A571BF58	Y42	1	15.8378	15.352	NA	16.1882	NA	15.9294	16.1822	NA	18.4422	15.1306	15.163	NA	NA	NA	15.2054	NA	NA	NA	NA	NA	15.4541	18.8401	NA	NA	NA	15.7068	14.0259	14.5335	NA	13.7886	14.1558	NA	NA	NA	NA	19.4332	NA	NA	NA	NA	12.8852	13.3973	NA	NA	NA
Neb_A0A571BF58_T47_1	Neb	A0A571BF58	T47	1	NA	15.3631	NA	NA	15.9088	NA	NA	NA	15.5971	NA	NA	NA	NA	16.0334	NA	NA	NA	NA	15.6036	NA	NA	NA	NA	NA	NA	NA	NA	NA	NA	NA	NA	NA	NA	NA	NA	NA	19.245	14.3646	NA	13.81	NA	NA	NA	11.8908	NA
Neb_A0A571BF58_T49_2	Neb	A0A571BF58	T49	2	15.0397	15.5711	13.8327	15.1021	12.7176	13.4914	14.5548	14.2691	13.9919	14.0069	14.3556	14.4393	14.4512	13.0138	13.7323	13.2077	13.6889	14.2814	14.5303	13.7718	14.7326	15.4823	15.0262	14.559	13.3341	14.1256	13.9421	14.0683	13.8714	14.8686	14.7661	13.6923	15.221	NA	13.7631	NA	13.4426	14.5431	13.2611	14.1489	14.2515	14.3701	14.4755	14.5624	14.2978
Neb_A0A571BF58_Y42_2	Neb	A0A571BF58	Y42	2	12.2494	NA	NA	12.4015	NA	NA	11.6409	NA	NA	NA	12.2428	9.1097	NA	NA	NA	NA	NA	12.6798	NA	NA	NA	NA	NA	NA	NA	NA	NA	NA	NA	11.6763	NA	NA	14.4341	NA	NA	NA	12.0765	NA	NA	14.1489	NA	NA	13.491	12.4597	13.2208
Neb_A0A571BF58_T47_2	Neb	A0A571BF58	T47	2	14.8144	15.6091	13.8327	14.8611	12.7176	13.4914	14.3494	14.2691	13.9919	14.0069	13.9763	14.4029	14.4512	13.0138	13.7323	13.2077	13.6889	13.7048	14.6677	13.7718	14.7326	15.5561	15.0262	14.559	13.3341	14.1256	13.9421	14.0683	13.8714	14.7014	14.7661	13.6923	13.9709	NA	13.7631	NA	12.7344	14.5431	13.2611	NA	14.2515	14.3701	14.3452	14.1801	13.3708
Neb_A0A571BF58_S45_2	Neb	A0A571BF58	S45	2	NA	15.5552	NA	NA	NA	NA	NA	NA	NA	NA	NA	NA	NA	NA	NA	NA	NA	NA	14.5708	NA	NA	15.3243	NA	NA	NA	NA	NA	NA	NA	NA	NA	NA	NA	NA	NA	NA	NA	NA	NA	NA	NA	NA	13.2206	NA	NA
Neb_A0A571BF58_T49_1	Neb	A0A571BF58	T49	1	15.0562	14.8017	14.3684	14.6392	14.6155	14.2569	13.5928	14.6493	13.8687	14.0805	14.255	14.3515	14.9391	13.9913	13.6879	13.8476	NA	14.859	14.8433	14.4754	14.3332	14.4911	14.5741	14.3221	14.079	14.2819	14.0523	14.1384	13.9053	14.2482	14.9456	14.6826	14.6492	13.7183	14.4312	14.516	NA	14.515	12.4032	NA	13.9694	13.6055	NA	NA	13.2444
Neb_A0A571BF58_S7359_1	Neb	A0A571BF58	S7359	1	20.4398	20.1087	19.9493	20.2145	19.7326	20.1346	19.99	19.9215	19.7031	19.8575	19.7332	19.9216	19.7511	19.9031	19.4208	19.4132	19.751	19.8768	19.9334	20.1171	19.7263	19.5445	19.3422	19.9753	20.0139	19.6896	19.7147	19.8256	19.7585	19.5194	19.7736	20.2466	20.3396	20.2395	19.9359	20.1493	20.1504	19.7609	19.7212	19.5851	20.2292	19.6082	19.6012	20.198	20.5385
Neb_A0A571BF58_Y7363_1	Neb	A0A571BF58	Y7363	1	NA	NA	NA	NA	NA	NA	NA	NA	NA	NA	NA	NA	NA	NA	NA	NA	NA	NA	NA	NA	NA	NA	NA	NA	NA	NA	NA	NA	NA	NA	NA	NA	NA	NA	NA	NA	NA	NA	NA	NA	NA	NA	NA	NA	NA
Neb_A0A571BF58_T7236_1	Neb	A0A571BF58	T7236	1	18.0186	19.2121	19.2698	19.2428	18.222	18.8851	19.1944	19.1409	17.9567	18.0794	18.095	18.3233	18.3876	18.032	17.9683	18.0668	18.3202	19.2002	19.3199	19.3886	19.6887	19.5177	18.4849	18.3841	19.3008	19.3515	19.2155	19.5602	18.3068	18.7584	18.597	18.2072	18.3149	18.4143	18.3427	18.4207	19.1202	18.4077	18.0782	18.4845	18.4918	17.6063	17.8668	18.5605	18.4809
Neb_A0A571BF58_T7233_1	Neb	A0A571BF58	T7233	1	NA	17.3669	NA	NA	NA	NA	NA	NA	NA	NA	NA	NA	NA	NA	NA	NA	NA	NA	NA	14.5345	17.7641	NA	NA	NA	NA	NA	NA	NA	NA	NA	NA	NA	NA	NA	NA	17.3555	NA	NA	NA	16.7768	NA	16.4591	NA	16.7863	NA
Neb_A0A571BF58_T7050_1	Neb	A0A571BF58	T7050	1	18.6404	18.943	18.085	18.3946	18.3316	18.3238	18.2247	18.3389	18.3032	18.5493	18.8058	18.808	18.9476	18.3907	18.345	18.65	18.8527	18.7207	18.8259	18.8625	19.0126	18.6759	18.4684	18.6913	18.6838	18.7611	18.4587	18.5273	18.3277	18.8736	19.0788	18.6732	18.9898	18.7372	18.7977	18.9004	19.2281	18.8076	18.1388	18.1385	18.2144	17.8383	18.2405	18.2585	17.924
Neb_A0A571BF58_T7143_1	Neb	A0A571BF58	T7143	1	18.6404	18.943	18.085	18.3946	18.3316	18.3238	18.2247	18.3389	18.3032	18.5493	18.8058	18.808	18.9476	18.3907	18.345	18.65	18.8527	18.7207	18.8259	18.8625	19.0126	18.6759	18.4684	18.6913	18.6838	18.7611	18.4587	18.5273	18.3277	18.8736	19.0788	18.6732	18.9898	18.7372	18.7977	18.9004	19.2281	18.8076	18.1388	18.1385	18.2144	17.8383	18.2405	18.2585	17.924
Neb_A0A571BF58_T7045_1	Neb	A0A571BF58	T7045	1	17.7525	17.5081	17.0062	17.079	16.9494	16.6734	17.2092	17.7976	17.0866	17.1514	16.5557	17.0019	17.4177	16.8885	16.9662	16.9433	17.8966	17.4339	17.4504	17.2921	17.4571	17.4143	17.5694	17.8876	17.282	17.159	17.205	17.5467	17.6387	18.0963	17.755	17.6559	17.5409	18.1605	17.8848	17.1387	17.0929	18.315	16.6395	16.8688	16.8962	16.5431	17.1686	16.751	17.0544
Neb_A0A571BF58_T7138_1	Neb	A0A571BF58	T7138	1	17.7525	17.5081	17.0062	17.079	16.9494	16.6734	17.2092	17.7976	17.0866	17.1514	16.5557	17.0019	17.4177	16.8885	16.9662	16.9433	17.8966	17.4339	17.4504	17.2921	17.4571	17.4143	17.5694	17.8876	17.282	17.159	17.205	17.5467	17.6387	18.0963	17.755	17.6559	17.5409	18.1605	17.8848	17.1387	17.0929	18.315	16.6395	16.8688	16.8962	16.5431	17.1686	16.751	17.0544
Neb_A0A571BF58_S219_1	Neb	A0A571BF58	S219	1	17.0374	16.9112	16.5315	16.4631	NA	16.5324	16.5268	16.4424	16.9141	16.855	16.7768	16.7142	16.8113	16.7357	16.7988	16.6932	17.0371	16.9396	16.3881	16.3386	16.7072	16.755	16.6149	16.678	NA	16.1187	16.5096	16.2867	16.3903	16.356	16.9024	16.8092	16.8464	16.8444	16.7439	NA	NA	16.4846	16.6072	16.2091	NA	16.1144	15.7835	16.392	NA
Neb_A0A571BF58_T5125_1	Neb	A0A571BF58	T5125	1	NA	NA	NA	NA	NA	16.9972	NA	NA	NA	NA	NA	NA	NA	NA	NA	NA	NA	NA	NA	16.3126	NA	NA	NA	NA	NA	NA	NA	NA	NA	NA	NA	16.2761	NA	NA	16.3382	NA	16.257	NA	NA	NA	NA	NA	NA	NA	NA
Neb_A0A571BF58_S5126_1	Neb	A0A571BF58	S5126	1	NA	NA	15.6496	NA	NA	NA	NA	15.9254	NA	NA	NA	NA	NA	NA	15.7804	NA	NA	NA	16.3995	NA	NA	NA	NA	NA	NA	15.6395	NA	NA	NA	15.9161	NA	NA	NA	NA	NA	16.0668	NA	NA	NA	NA	NA	NA	NA	NA	NA
Neb_A0A571BF58_S7374_1	Neb	A0A571BF58	S7374	1	18.1935	17.7511	17.7569	17.6264	17.816	17.8933	17.8158	17.3975	18.0221	17.8111	17.8396	17.8251	17.6319	18.0727	17.8195	17.7087	17.5186	18.048	17.5711	17.6419	17.63	17.6874	17.2299	17.5577	17.6381	17.4181	17.4339	17.2625	17.6986	16.9026	17.3816	17.9548	17.8674	17.536	17.4462	17.9338	17.8153	17.5177	17.4332	17.4953	18.3567	17.5166	17.6148	18.1028	18.005
Neb_A0A571BF58_S1831_1	Neb	A0A571BF58	S1831	1	16.7387	16.802	16.4844	16.8325	16.6868	16.8967	16.9955	17.0618	16.9444	16.993	16.9829	16.681	16.9207	16.7933	16.8105	17.005	17.1115	16.6416	16.5115	16.7159	16.7852	17.0081	16.9811	17.1605	16.3034	16.6906	16.8994	17.5517	17.0563	17.4453	16.6354	16.6316	16.8644	17.4119	17.0485	16.8725	16.6928	17.0465	16.1999	16.2015	16.4565	16.2819	16.3139	16.4695	16.1645
Neb_A0A571BF58_S2075_1	Neb	A0A571BF58	S2075	1	16.7387	16.802	16.4844	16.8325	16.6868	16.8967	16.9955	17.0618	16.9444	16.993	16.9829	16.681	16.9207	16.7933	16.8105	17.005	17.1115	16.6416	16.5115	16.7159	16.7852	17.0081	16.9811	17.1605	16.3034	16.6906	16.8994	17.5517	17.0563	17.4453	16.6354	16.6316	16.8644	17.4119	17.0485	16.8725	16.6928	17.0465	16.1999	16.2015	16.4565	16.2819	16.3139	16.4695	16.1645
Neb_A0A571BF58_S6740_1	Neb	A0A571BF58	S6740	1	13.2454	14.2614	13.6351	14.1538	13.7347	14.5658	14.4069	14.0807	14.0946	14.3748	14.4213	14.2132	14.4452	14.2233	14.073	14.0592	15.3875	14.2598	13.9507	14.0635	14.4114	14.3175	14.3795	14.3955	14.3906	14.1626	14.2726	14.8965	14.1939	14.7997	13.9787	14.2051	14.0123	15.1043	14.2458	14.385	14.1341	13.8133	13.2598	13.0285	13.7533	13.2649	13.5742	13.7918	13.4478
Neb_A0A571BF58_S3194_1	Neb	A0A571BF58	S3194	1	14.4916	14.3422	13.6654	13.7707	14.228	13.8865	13.9426	14.1225	14.0881	14.3413	14.0905	14.2751	14.6041	13.949	14.1363	14.1551	14.4924	14.2011	13.7539	13.774	13.7517	13.2433	13.3815	14.1431	13.9195	13.7091	14.2436	13.8706	13.9098	14.385	13.5858	14.4445	13.8	14.2413	14.0277	13.9205	13.6922	13.8317	14.4056	13.7747	14.4663	14.2546	14.5648	14.4551	13.9982
Neb_A0A571BF58_S3437_1	Neb	A0A571BF58	S3437	1	14.4916	14.3422	13.6654	13.7707	14.228	13.8865	13.9426	14.1225	14.0881	14.3413	14.0905	14.2751	14.6041	13.949	14.1363	14.1551	14.4924	14.2011	13.7539	13.774	13.7517	13.2433	13.3815	14.1431	13.9195	13.7091	14.2436	13.8706	13.9098	14.385	13.5858	14.4445	13.8	14.2413	14.0277	13.9205	13.6922	13.8317	14.4056	13.7747	14.4663	14.2546	14.5648	14.4551	13.9982
Neb_A0A571BF58_S4672_1	Neb	A0A571BF58	S4672	1	NA	15.2983	NA	13.9792	13.9544	NA	NA	14.9784	14.0911	NA	14.4498	14.7476	14.9468	14.7222	14.3804	14.785	14.3142	NA	NA	NA	13.9444	NA	NA	NA	15.7409	14.5563	15.5787	NA	NA	NA	14.6816	15.0748	15.0004	14.7757	14.5484	15.1117	15.0781	NA	15.1079	14.0758	13.3829	15.3326	15.3365	15.7038	14.7943
Neb_A0A571BF58_T4671_1	Neb	A0A571BF58	T4671	1	15.4989	13.7816	15.8112	NA	15.262	15.9466	15.3202	NA	14.9185	15.9689	14.8643	15.6852	14.4007	NA	14.1189	14.7133	NA	14.9818	14.943	14.978	NA	NA	14.5445	15.9063	NA	14.61	NA	15.7225	16.0284	16.0281	14.9248	14.8629	15.0123	NA	14.5427	14.9953	15.3047	14.6763	NA	14.5139	14.9657	12.5474	14.7618	NA	13.0177
Neb_A0A571BF58_S3728_1	Neb	A0A571BF58	S3728	1	15.2955	15.2032	12.8241	14.4345	14.9273	14.8137	14.8986	15.1707	14.8439	14.9377	15.2691	14.998	15.041	14.643	14.5579	14.9566	15.0965	15.3634	14.9797	10.3443	14.5575	15.1011	14.4163	15.2145	15.1629	14.8879	14.9003	15.4478	14.9562	14.9923	14.8855	15.0996	15.7184	15.4477	15.2066	13.599	15.5411	15.232	14.787	14.3352	14.5976	13.2381	14.8149	14.6529	13.6242
Neb_A0A571BF58_S7002_1	Neb	A0A571BF58	S7002	1	NA	NA	NA	NA	NA	NA	NA	NA	NA	NA	NA	NA	NA	NA	NA	NA	NA	NA	NA	NA	NA	NA	NA	NA	NA	NA	NA	NA	NA	NA	NA	NA	NA	NA	NA	NA	NA	NA	NA	NA	NA	NA	NA	NA	NA
Neb_A0A571BF58_S7064_1	Neb	A0A571BF58	S7064	1	NA	NA	NA	NA	NA	NA	NA	NA	NA	NA	NA	NA	NA	NA	NA	NA	NA	NA	NA	NA	NA	NA	NA	NA	NA	NA	NA	NA	NA	NA	NA	NA	NA	NA	NA	NA	NA	NA	NA	NA	NA	NA	NA	NA	NA
Neb_A0A571BF58_S7095_1	Neb	A0A571BF58	S7095	1	NA	NA	NA	NA	NA	NA	NA	NA	NA	NA	NA	NA	NA	NA	NA	NA	NA	NA	NA	NA	NA	NA	NA	NA	NA	NA	NA	NA	NA	NA	NA	NA	NA	NA	NA	NA	NA	NA	NA	NA	NA	NA	NA	NA	NA
Neb_A0A571BF58_S7219_1	Neb	A0A571BF58	S7219	1	NA	NA	NA	NA	NA	NA	NA	NA	NA	NA	NA	NA	NA	NA	NA	NA	NA	NA	NA	NA	NA	NA	NA	NA	NA	NA	NA	NA	NA	NA	NA	NA	NA	NA	NA	NA	NA	NA	NA	NA	NA	NA	NA	NA	NA
Neb_A0A571BF58_S7003_1	Neb	A0A571BF58	S7003	1	NA	NA	13.0263	NA	NA	12.8495	NA	NA	NA	NA	NA	NA	NA	NA	NA	NA	NA	12.6973	NA	NA	13.3869	NA	13.0223	NA	NA	NA	13.8856	NA	NA	NA	NA	NA	NA	NA	NA	NA	NA	NA	NA	NA	NA	NA	NA	NA	NA
Neb_A0A571BF58_S7065_1	Neb	A0A571BF58	S7065	1	NA	NA	13.0263	NA	NA	12.8495	NA	NA	NA	NA	NA	NA	NA	NA	NA	NA	NA	12.6973	NA	NA	13.3869	NA	NA	NA	NA	NA	13.8856	NA	NA	NA	NA	NA	NA	NA	NA	NA	NA	NA	NA	NA	NA	NA	NA	NA	NA
Neb_A0A571BF58_S7096_1	Neb	A0A571BF58	S7096	1	NA	NA	13.0263	NA	NA	12.8495	NA	NA	NA	NA	NA	NA	NA	NA	NA	NA	NA	12.6973	NA	NA	13.3869	NA	NA	NA	NA	NA	13.8856	NA	NA	NA	NA	NA	NA	NA	NA	NA	NA	NA	NA	NA	NA	NA	NA	NA	NA
Neb_A0A571BF58_S7220_1	Neb	A0A571BF58	S7220	1	NA	NA	13.0263	NA	NA	12.8495	NA	NA	NA	NA	NA	NA	NA	NA	NA	NA	NA	12.6973	NA	NA	13.3869	NA	NA	NA	NA	NA	13.8856	NA	NA	NA	NA	NA	NA	NA	NA	NA	NA	NA	NA	NA	NA	NA	NA	NA	NA
Neb_A0A571BF58_Y7006_1	Neb	A0A571BF58	Y7006	1	12.3624	13.2539	NA	14.0397	13.7767	NA	14.3551	14.1587	13.32	13.2525	14.0141	13.1039	12.3883	13.2179	13.316	13.726	13.5172	13.2734	14.2837	14.2261	12.2424	14.538	14.3012	14.557	14.1638	14.5309	14.4675	14.3457	14.0776	14.5008	12.4942	14.4696	13.6802	14.6234	14.6809	12.8183	12.9382	12.9669	13.741	13.1842	12.567	14.3609	14.2345	13.719	13.6775
Neb_A0A571BF58_Y7068_1	Neb	A0A571BF58	Y7068	1	NA	13.0497	NA	13.5501	13.1831	NA	13.5888	13.6059	12.2065	13.2525	13.1887	NA	NA	12.3539	13.316	12.2725	13.4303	13.2734	13.4263	13.8216	NA	13.8746	13.5615	13.6897	13.2833	14.0339	13.7456	13.5077	13.3979	14.0179	NA	13.8967	12.5167	14.016	13.1483	12.8183	NA	NA	13.4512	12.9316	NA	13.8623	13.7733	13.719	12.9172
Neb_A0A571BF58_Y7099_1	Neb	A0A571BF58	Y7099	1	NA	13.0497	NA	13.5501	13.1831	NA	13.5888	13.6059	12.2065	13.2525	13.1887	NA	NA	12.3539	13.316	12.2725	13.4303	13.2734	13.4263	13.8216	NA	13.8746	13.5615	13.6897	13.2833	14.0339	13.7456	13.5077	13.3979	14.0179	NA	13.8967	12.5167	14.016	13.1483	12.8183	NA	NA	13.4512	12.9316	NA	13.8623	13.7733	13.719	12.9172
Neb_A0A571BF58_Y7223_1	Neb	A0A571BF58	Y7223	1	NA	13.0497	NA	13.5501	13.1831	NA	13.5888	13.6059	12.2065	13.2525	13.1887	NA	NA	12.3539	13.316	12.2725	13.4303	13.2734	13.4263	13.8216	NA	13.8746	13.5615	13.6897	13.2833	14.0339	13.7456	13.5077	13.3979	14.0179	NA	13.8967	12.5167	14.016	13.1483	12.8183	NA	NA	13.4512	12.9316	NA	13.8623	13.7733	13.719	12.9172
Neb_A0A571BF58_S2026_1	Neb	A0A571BF58	S2026	1	13.8863	15.0862	14.6551	14.7815	15.1132	15.1468	15.03	15.1762	14.0693	15.0962	13.3102	15.2761	15.3939	15.166	14.9321	15.0431	14.6754	15.4486	15.4551	15.5737	15.5923	15.4498	15.347	15.3693	15.4486	15.4518	15.4004	15.2779	15.286	15.4426	15.3572	15.3919	15.716	15.2807	15.4344	15.4284	15.5064	15.1977	14.962	14.3819	14.8804	14.1926	14.4104	14.5906	14.2449
Neb_A0A571BF58_S1219_1	Neb	A0A571BF58	S1219	1	15.4431	15.1796	14.9102	14.6737	15.1655	15.2847	14.8596	15.1673	15.1885	15.192	14.9664	15.0729	15.3459	15.2556	15.0166	15.0857	15.4338	15.3839	14.6303	14.6873	14.2209	14.6039	14.5906	14.7173	14.2307	14.7839	14.5563	14.9847	14.6515	14.9069	14.282	14.5178	14.2637	15.067	14.7885	14.5484	14.4241	14.7658	13.6141	13.6321	14.1845	14.0954	13.9486	14.2664	13.9519
Neb_A0A571BF58_S4867_1	Neb	A0A571BF58	S4867	1	13.369	13.7825	12.9932	12.7504	13.7829	13.1811	13.6492	13.6168	13.9036	13.0243	13.7425	13.9267	NA	12.2917	13.2125	12.599	13.7545	12.7185	13.1148	14.0333	14.1504	14.3029	13.8046	14.0685	13.2453	14.2448	14.1601	14.5458	13.8111	14.1148	14.0466	13.552	15.0537	14.1159	13.853	15.6273	15.383	13.9332	12.8628	12.0836	12.9058	13.2132	12.2906	12.9134	13.1047
Neb_A0A571BF58_S4652_1	Neb	A0A571BF58	S4652	1	13.9511	14.847	13.9052	12.4626	14.2343	14.8618	13.2303	13.0478	12.1849	13.5355	13.2324	12.2389	12.7823	11.6713	13.2331	13.2963	NA	13.6102	13.5968	14.0482	13.5536	12.3688	11.4761	13.3066	14.6109	14.2461	12.706	12.1649	12.3509	13.0232	12.0354	11.7382	11.6369	13.7112	11.6352	NA	12.777	12.6129	12.1595	11.8287	12.6696	10.4724	11.9688	12.5437	11.7945
Neb_A0A571BF58_T5151_1	Neb	A0A571BF58	T5151	1	14.4777	14.8332	NA	13.6409	14.3023	14.6662	14.184	14.1379	13.8859	14.0968	14.154	14.243	14.5151	13.6911	14.1548	13.9989	14.0684	14.3037	14.5837	15.0132	14.5232	14.2395	14.0865	14.3267	15.0938	14.13	14.3113	14.3586	13.8487	14.2945	13.6632	13.8057	14.0487	14.1736	14.1132	14.4155	13.7382	14.3373	13.6217	13.1057	14.0257	13.6098	14.278	14.3261	13.7789
Neb_A0A571BF58_T7236_2	Neb	A0A571BF58	T7236	2	18.6226	17.0789	18.4049	15.4958	17.4642	17.6734	17.0577	17.838	16.5341	15.6579	NA	18.0657	18.0846	17.8866	15.2888	15.1555	18.239	16.4938	16.8658	16.354	18.1329	14.0506	17.8797	18.0104	16.5437	18.1452	15.343	17.9011	14.8199	14.8074	17.8709	16.4647	17.9279	17.9857	14.28	14.4982	14.6292	13.8765	16.6564	17.808	16.7802	16.5945	16.6521	17.5043	17.766
Neb_A0A571BF58_T7231_2	Neb	A0A571BF58	T7231	2	18.6801	17.2396	18.6841	18.5298	17.6954	18.017	18.0386	18.8324	18.3359	18.4003	17.7413	18.9879	18.4395	18.8803	16.613	16.8296	18.5522	17.9772	18.193	18.0999	18.1735	16.4292	18.9802	18.3913	18.4011	18.3152	17.9358	18.3611	16.9331	18.2722	18.2539	18.3661	18.3669	18.3157	16.5966	16.3147	17.8646	16.3867	18.0945	18.7576	18.2771	17.992	18.0319	17.7046	17.7769
Neb_A0A571BF58_T7233_2	Neb	A0A571BF58	T7233	2	16.55	13.9935	16.1772	18.3419	14.9396	15.7784	17.0192	17.8267	17.8483	18.1668	17.7413	17.9057	16.2421	17.874	15.8775	16.2872	16.1947	17.3386	17.4596	17.5891	13.0028	16.683	18.0743	16.2836	17.9352	16.2435	17.9041	16.4881	16.5539	18.1352	16.1534	18.1324	16.4366	16.0253	16.8605	16.6752	17.7026	16.62	17.4301	17.7053	17.8429	17.5655	17.5858	14.7573	14.496
Neb_A0A571BF58_T7231_1	Neb	A0A571BF58	T7231	1	18.461	18.7476	18.201	18.2553	18.3576	18.5104	18.7883	18.4963	18.659	18.6565	18.7237	18.5205	18.5758	18.4145	18.4819	18.6685	18.517	18.448	18.3437	18.2989	18.317	18.0943	18.419	17.9283	18.2784	18.3571	18.0613	18.7291	18.5366	18.7194	18.5635	18.2717	18.7469	18.2374	18.4751	18.6661	18.6413	18.4783	17.1675	17.4853	17.9565	17.7481	17.2986	17.2119	17.7653
Neb_A0A571BF58_T7302_1	Neb	A0A571BF58	T7302	1	16.9227	16.9232	16.2292	16.6152	16.4836	16.2439	16.1787	16.276	16.4194	16.4921	16.1446	15.763	16.1027	16.0893	15.8836	16.0193	NA	NA	16.3536	16.2273	16.3264	16.3438	16.2148	16.3454	16.0565	15.9009	15.7545	16.3277	16.5792	16.7227	16.4321	NA	16.478	16.4913	NA	16.1321	16.1593	16.1966	15.6552	NA	NA	NA	NA	15.8473	NA
Neb_A0A571BF58_T5972_1	Neb	A0A571BF58	T5972	1	15.3343	15.1497	14.6388	14.9242	15.1592	14.6261	15.1412	14.5099	15.0076	15.2041	14.8466	14.7258	15.4685	14.9572	14.9359	14.6346	15.0212	15.581	15.0246	14.639	14.8569	14.5954	14.5607	14.7511	15.0013	14.5839	14.7729	14.5249	15.0791	14.9405	14.7938	15.1682	15.3448	15.0462	14.9926	14.9971	15.3795	14.9491	14.3048	14.1164	14.2342	14.0096	14.3126	14.1789	14.7644
Neb_A0A571BF58_T7081_1	Neb	A0A571BF58	T7081	1	14.8614	14.7568	14.1017	14.5782	13.8462	15.1768	15.531	15.4714	15.1759	15.1425	15.2487	15.5447	15.6574	15.1062	13.7284	14.292	14.2617	14.9852	15.35	15.5455	15.5949	14.8778	14.7144	15.8926	15.6466	15.1274	15.0179	15.9852	14.6191	16.2392	16.1483	14.9383	16.1243	14.6883	15.852	16.1642	14.9564	15.9211	15.1916	14.4303	14.0836	13.9826	14.2719	14.1823	14.1589
Neb_A0A571BF58_S393_1	Neb	A0A571BF58	S393	1	15.0666	14.6654	14.999	14.0922	14.5145	14.9495	15.0558	14.5183	14.7485	14.4769	14.8856	12.729	14.3517	15.0514	15.1141	14.3807	15.5152	14.2195	NA	14.8084	14.5063	14.4441	14.7425	14.7923	14.7976	14.6541	13.9254	15.1698	14.6846	14.6606	14.6777	14.7012	14.7626	15.3149	14.4995	13.9798	14.6669	14.6691	14.9711	14.3562	13.6469	12.4673	NA	14.0494	13.1511
Neb_A0A571BF58_Y1722_1	Neb	A0A571BF58	Y1722	1	18.8505	18.9448	15.0165	16.3688	18.3499	15.3782	16.5872	18.7853	15.3308	14.6966	15.9897	13.806	14.6574	15.7972	14.5717	14.7332	15.3758	15.2122	15.4658	14.5828	16.9868	16.6831	16.3778	16.6753	15.6696	19.0106	17.0111	18.5807	14.7189	15.0247	17.6382	18.7623	16.3005	14.6344	15.0274	15.3329	16.3736	13.9059	18.4744	14.79	15.0747	18.7102	14.4308	14.2826	13.9781
Neb_A0A571BF58_S1723_1	Neb	A0A571BF58	S1723	1	17.3313	16.5956	16.5613	15.9118	16.0449	16.5477	16.5353	16.4026	16.3758	16.9538	16.0153	16.1646	17.0909	15.8954	16.1101	16.3268	16.1159	17.9648	16.5038	16.3071	16.8717	16.6118	16.4459	16.6352	17.589	16.494	17.1908	16.6457	17.4727	16.995	16.4726	16.5673	16.3913	17.4448	16.3462	15.8706	17.5192	17.1711	16.0094	15.6419	16.7025	15.4655	15.6614	17.8998	15.757
Neb_A0A571BF58_T1726_1	Neb	A0A571BF58	T1726	1	NA	NA	NA	NA	NA	NA	NA	NA	NA	NA	NA	NA	NA	NA	NA	NA	NA	NA	NA	NA	NA	13.5827	NA	NA	NA	NA	NA	NA	NA	NA	NA	NA	NA	NA	NA	NA	NA	NA	NA	NA	NA	NA	NA	NA	NA
Neb_A0A571BF58_T1721_1	Neb	A0A571BF58	T1721	1	NA	13.5396	13.1741	NA	NA	NA	NA	NA	NA	13.6873	14.4749	14.3181	NA	NA	NA	NA	NA	NA	NA	NA	NA	NA	NA	13.6298	NA	NA	NA	NA	NA	NA	NA	NA	NA	NA	14.5075	NA	NA	NA	NA	NA	NA	NA	NA	NA	NA
Neb_A0A571BF58_T7200_1	Neb	A0A571BF58	T7200	1	17.7238	18.5532	17.9531	18.3333	17.5864	17.2991	18.3439	17.8793	18.0721	17.8423	17.2912	18.4068	17.7686	17.7277	16.8827	17.3609	17.5105	18.0302	17.7777	18.4671	18.6156	17.9901	18.0572	18.1033	18.4161	18.4504	18.3212	17.9102	18.0263	17.6681	18.5558	18.5019	18.7993	17.5838	17.6401	18.7013	18.5169	18.043	16.9482	18.1022	17.9158	17.8636	18.2953	17.1966	18.0379
Neb_A0A571BF58_T7205_1	Neb	A0A571BF58	T7205	1	16.0608	16.4141	15.9294	16.446	15.381	14.9599	13.8947	14.2062	13.5507	13.8375	NA	14.6922	15.5168	NA	14.0839	14.9205	14.3848	16.2167	16.1841	16.8898	15.0103	NA	15.2853	14.7097	15.9029	16.3793	14.3775	15.1481	14.6234	14.9568	14.9701	NA	NA	14.8968	16.3629	15.6593	15.6873	15.2066	NA	15.546	14.9376	NA	16.1711	NA	NA
Neb_A0A571BF58_T7205_2	Neb	A0A571BF58	T7205	2	NA	NA	NA	15.1386	13.5728	NA	NA	14.4485	14.1329	NA	NA	14.689	14.63	13.7325	NA	14.0415	14.0175	NA	NA	NA	14.1888	NA	NA	NA	NA	NA	NA	14.5524	NA	NA	14.1595	NA	NA	14.048	NA	15.1157	NA	14.8608	NA	14.9992	14.5232	15.0615	NA	15.1307	15.3024
Neb_A0A571BF58_T7200_2	Neb	A0A571BF58	T7200	2	13.8465	16.4378	13.8178	15.5112	13.5728	15.7581	NA	14.4485	14.8916	NA	13.6431	15.6326	15.0036	15.4509	NA	14.0415	14.6608	12.2524	NA	14.1584	14.9155	14.1271	NA	NA	12.2304	13.5964	NA	14.5524	NA	NA	14.1595	13.7807	NA	14.495	NA	15.8558	12.7997	14.8608	NA	15.4061	14.5232	16.0295	14.1299	15.1307	15.3024
Neb_A0A571BF58_T7202_2	Neb	A0A571BF58	T7202	2	13.8465	16.4378	13.8178	13.3756	NA	15.7581	NA	NA	13.6016	NA	13.6431	14.5739	12.8715	14.9283	NA	NA	13.1859	12.2524	NA	14.1584	13.5779	14.1271	NA	NA	12.2304	13.5964	NA	NA	NA	NA	NA	13.7807	NA	12.5868	NA	14.5385	12.7997	NA	NA	13.3815	NA	14.9968	14.1299	NA	NA
Neb_A0A571BF58_T7019_1	Neb	A0A571BF58	T7019	1	NA	15.4432	16.1681	16.6516	16.5972	14.0094	NA	NA	16.7763	16.9605	16.9458	17.082	NA	NA	16.6435	16.7088	16.7672	16.5178	16.7851	16.9455	16.2245	16.82	17.0483	17.1202	NA	NA	NA	NA	NA	17.0769	NA	16.4543	16.3362	17.1403	NA	16.0356	16.47	NA	16.8608	15.5079	NA	16.5372	14.9875	NA	NA
Neb_A0A571BF58_S128_1	Neb	A0A571BF58	S128	1	14.0867	13.9842	14.1382	13.4451	NA	13.7856	14.1851	13.6995	13.3713	13.5996	13.6013	13.8205	13.343	13.3929	14.0383	14.0473	14.5425	14.1643	14.1066	13.8327	13.8056	14.3955	14.6627	13.9011	14.1857	14.6403	14.0099	14.1471	13.6085	14.6379	14.8809	13.5633	14.0988	14.5563	14.3012	12.7619	13.6876	14.2501	14.5839	13.9903	12.8781	13.0756	13.0004	12.9866	13.2283
Neb_A0A571BF58_S608_1	Neb	A0A571BF58	S608	1	19.078	18.7859	19.2307	18.8415	18.2846	18.8871	19.3382	18.9817	18.7445	18.8248	18.8683	18.6101	18.6452	18.7938	18.9293	18.7012	18.9129	19.015	19.1184	18.7802	18.7258	18.9522	18.9278	18.931	18.5381	18.7861	18.7688	18.8271	18.8409	18.9906	18.6968	18.883	19.3841	18.8873	18.7417	18.4556	19.0646	18.5041	19.2719	19.0292	18.8931	18.4705	18.9343	19.0543	18.7629
Neb_A0A571BF58_S855_1	Neb	A0A571BF58	S855	1	19.078	18.7859	19.2307	18.8415	18.2846	18.8871	19.3382	18.9817	18.7445	18.8248	18.8683	18.6101	18.6452	18.7938	18.9293	18.7012	18.9129	19.015	19.1184	18.7802	18.7258	18.9522	18.9278	18.931	18.5381	18.7861	18.7688	18.8271	18.8409	18.9906	18.6968	18.883	19.3841	18.8873	18.7417	18.4556	19.0646	18.5041	19.2719	19.0292	18.8931	18.4705	18.9343	19.0543	18.7629
Neb_A0A571BF58_S7257_1	Neb	A0A571BF58	S7257	1	15.0528	15.9481	15.2232	14.4255	NA	15.1719	15.4698	14.3493	15.6013	15.796	15.4656	15.356	15.4999	15.8713	15.5645	15.6048	15.7396	16.0569	14.9647	14.8593	15.7409	15.8563	15.4795	14.772	15.391	15.8503	13.7234	NA	15.8343	15.7696	15.7897	15.6027	15.9247	NA	15.5402	15.7413	14.8315	15.6195	14.4109	NA	15.059	NA	NA	NA	15.5838
Neb_A0A571BF58_S7255_1	Neb	A0A571BF58	S7255	1	NA	NA	NA	15.0802	15.0178	NA	NA	15.1677	NA	NA	NA	NA	NA	NA	NA	NA	NA	NA	NA	NA	NA	NA	NA	15.2356	NA	NA	15.2262	15.1168	NA	NA	NA	NA	NA	14.8397	NA	NA	NA	NA	NA	14.5341	NA	14.8975	14.7892	14.9467	NA
Neb_A0A571BF58_S7251_1	Neb	A0A571BF58	S7251	1	NA	NA	NA	NA	NA	NA	NA	NA	NA	NA	NA	NA	NA	NA	NA	NA	NA	NA	NA	NA	NA	NA	NA	NA	NA	NA	NA	NA	NA	NA	NA	13.9838	NA	NA	NA	13.1905	NA	NA	NA	NA	NA	NA	NA	13.1356	NA
Neb_A0A571BF58_Y7254_1	Neb	A0A571BF58	Y7254	1	10.5347	14.2433	NA	NA	13.6175	14.0317	14.0631	NA	NA	NA	NA	NA	NA	NA	13.0363	NA	12.6118	NA	NA	NA	NA	NA	14.4914	NA	12.2423	NA	NA	13.7409	NA	NA	NA	NA	14.0105	NA	NA	14.0459	NA	NA	13.3533	NA	13.5668	14.1476	13.742	13.3309	NA
Neb_A0A571BF58_S503_1	Neb	A0A571BF58	S503	1	15.7985	16.1471	15.8244	15.4354	15.7723	16.0155	14.6712	15.8129	15.5977	15.1301	14.3656	15.1756	14.4755	14.6433	15.3316	14.8705	14.6345	15.8055	15.729	15.7552	15.552	15.8393	15.3864	15.3838	15.8312	15.8701	15.5632	14.1323	14.2815	14.7586	13.9238	14.106	14.1662	14.7074	13.3556	13.6901	14.5362	14.2563	13.8226	14.9447	15.6336	15.5812	15.3659	15.5875	15.3785
Neb_A0A571BF58_S513_1	Neb	A0A571BF58	S513	1	14.9397	13.5486	15.8653	13.7547	14.5429	14.5333	15.3279	14.2592	14.8447	15.4395	14.9703	13.1208	13.9195	15.5394	15.5546	14.3784	15.7899	15	14.5552	12.7184	NA	14.8623	15.6418	14.9697	14.184	14.3796	14.2644	12.5431	15.2036	14.7654	15.0496	14.8287	15.1853	14.8945	14.7647	14.2757	14.8075	14.9282	13.2694	15.8424	12.8848	11.4226	13.9889	13.4452	14.4313
Neb_A0A571BF58_S5894_1	Neb	A0A571BF58	S5894	1	NA	NA	NA	NA	14.7751	NA	NA	NA	NA	NA	NA	NA	NA	NA	NA	NA	NA	14.1778	NA	NA	NA	NA	NA	NA	NA	NA	14.6956	14.8043	NA	NA	NA	NA	NA	NA	NA	NA	NA	NA	14.981	NA	NA	NA	NA	NA	NA
Neb_A0A571BF58_T5902_1	Neb	A0A571BF58	T5902	1	13.667	14.4576	14.3672	14.8293	14.1303	15.2264	14.1878	15.0231	13.4667	NA	15.1379	15.8784	NA	13.9771	14.2527	14.6307	NA	14.6658	NA	15.118	14.5399	14.1602	15.0188	14.653	14.449	14.3709	NA	NA	14.7392	13.2629	15.4375	15.4083	15.5168	NA	15.5147	15.6705	13.8969	16.0759	13.9385	NA	NA	13.9169	14.2407	NA	14.7748
Neb_A0A571BF58_T6952_1	Neb	A0A571BF58	T6952	1	13.1972	14.0513	NA	14.5699	9.42146	13.2656	13.3139	14.2256	13.5228	14.8223	13.8938	15.1669	14.9442	13.954	12.467	14.5286	14.3469	14.3353	13.3949	11.2896	14.0818	13.8968	14.7042	15.0193	13.5184	13.7436	14.1065	14.6758	14.7686	15.7703	15.3826	15.2468	15.5401	15.3746	15.4392	15.2886	NA	15.5969	12.9811	13.3888	13.4593	13.2954	14.3323	11.5606	14.5578
Neb_A0A571BF58_S3958_1	Neb	A0A571BF58	S3958	1	NA	NA	11.5352	NA	NA	NA	11.4613	NA	NA	11.2636	NA	11.5718	NA	NA	NA	NA	NA	NA	NA	NA	NA	NA	NA	NA	NA	NA	10.9605	NA	NA	NA	11.4168	NA	NA	NA	NA	NA	NA	NA	NA	10.5042	10.9993	NA	NA	10.7213	NA
Neb_A0A571BF58_S3960_1	Neb	A0A571BF58	S3960	1	11.5274	11.3672	NA	NA	10.0198	NA	NA	11.4193	NA	NA	11.6093	NA	12.3396	10.9749	11.4533	11.4132	12.3134	11.8443	NA	10.8813	10.8814	11.62	10.9575	12.1503	11.593	11.0797	NA	12.0959	10.7508	11.1169	NA	11.3767	11.3441	NA	10.7502	11.4314	11.4823	11.6837	11.75	NA	NA	10.6274	11.3931	10.7466	8.99331
Neb_A0A571BF58_S432_1	Neb	A0A571BF58	S432	1	NA	12.9552	13.7453	14.547	NA	13.6887	14.8027	NA	14.5554	14.6963	14.5133	13.2718	14.2954	14.7083	15.0109	13.3485	14.471	NA	13.7257	12.9468	13.299	13.7281	13.4945	13.2558	14.9075	14.0323	NA	14.6038	14.6799	14.4515	12.9196	13.2864	13.3843	13.5496	13.4454	13.882	NA	13.4506	13.4092	13.4185	NA	12.7149	13.3827	12.4819	12.7532
Neb_A0A571BF58_S7419_1	Neb	A0A571BF58	S7419	1	15.967	NA	15.7159	NA	15.8589	NA	15.6568	15.6658	NA	NA	NA	15.9102	NA	NA	15.7096	NA	16.0431	NA	NA	15.5836	NA	15.7352	NA	NA	15.9721	NA	NA	NA	NA	NA	15.5587	NA	NA	NA	NA	16.3406	NA	NA	NA	NA	NA	NA	NA	NA	NA
Neb_A0A571BF58_S7416_1	Neb	A0A571BF58	S7416	1	NA	NA	NA	15.396	NA	NA	15.0013	NA	15.5077	15.2834	15.5279	NA	NA	15.7581	NA	NA	14.5521	NA	NA	NA	NA	NA	NA	15.2092	NA	15.4523	15.6449	NA	NA	NA	NA	NA	NA	NA	NA	NA	NA	14.1985	NA	NA	15.0846	15.0099	NA	NA	NA
Neb_A0A571BF58_T7417_1	Neb	A0A571BF58	T7417	1	NA	NA	NA	14.9839	NA	NA	NA	NA	NA	NA	14.453	14.6479	NA	NA	NA	NA	NA	NA	15.4288	NA	NA	NA	15.1474	NA	NA	NA	14.4355	14.6909	NA	13.863	NA	15.904	15.6516	NA	NA	NA	NA	NA	14.9757	NA	NA	13.4864	NA	NA	NA
Neb_A0A571BF58_Y7418_1	Neb	A0A571BF58	Y7418	1	NA	15.9369	NA	NA	NA	NA	NA	NA	NA	NA	NA	NA	15.7824	NA	14.9038	15.2818	NA	NA	NA	NA	15.2826	NA	NA	NA	NA	NA	NA	15.4294	NA	15.2055	NA	NA	NA	NA	NA	NA	15.6328	15.1912	NA	15.1791	NA	NA	15.089	NA	NA
Neb_A0A571BF58_S6280_1	Neb	A0A571BF58	S6280	1	15.8039	16.1677	15.5371	15.496	15.8577	16.3012	15.927	16.0838	15.7929	15.8617	15.6945	16.2834	15.8918	15.5094	15.5575	15.5813	15.9057	16.1179	16.3095	16.2643	16.0269	15.2112	15.5077	16.2073	16.2319	16.1523	15.5038	16.216	16.2184	15.8798	16.3437	16.0876	16.2343	16.2505	15.4355	15.8378	16.2291	16.092	15.999	15.2897	15.9988	15.1322	16.0559	15.3992	15.1296
Neb_A0A571BF58_S7009_1	Neb	A0A571BF58	S7009	1	14.8693	14.4212	14.5283	14.528	14.5113	14.3303	14.4712	NA	12.504	NA	NA	NA	13.2498	11.6781	NA	11.406	13.2258	14.6425	14.7907	14.4381	13.6772	NA	12.8844	NA	14.7371	14.4113	NA	NA	NA	12.8435	14.763	15.0532	14.4048	11.0889	14.7553	14.4177	14.4974	12.4344	14.0661	14.399	14.1731	NA	14.6298	15.9838	14.5651
Neb_A0A571BF58_T7174_1	Neb	A0A571BF58	T7174	1	20.8502	20.9225	20.7576	20.8765	20.6865	20.6571	20.8087	20.8432	20.9596	20.9962	21.0275	21.1153	21.434	20.9759	20.7661	21.1882	21.2643	21.2022	20.9607	21.1794	21.2507	21.1723	20.9657	21.008	21.0144	20.9403	21.0049	20.7829	20.8575	21.1176	21.1002	20.787	21.2126	20.995	20.8893	21.7956	21.148	21.0752	20.3421	20.2526	20.1542	19.7495	20.3144	20.4035	20.1977
Neb_A0A571BF58_T7169_1	Neb	A0A571BF58	T7169	1	18.7565	19.1391	16.5518	18.6484	18.1364	18.0935	18.1819	17.7741	18.6033	18.6295	NA	18.6805	18.163	18.459	18.2973	16.7304	18.7784	18.7439	18.2817	18.3286	18.486	18.3779	18.5784	18.7248	18.3232	18.2596	18.3274	18.9778	18.6458	18.5244	18.4466	18.7408	18.6288	18.753	18.3345	18.8016	18.198	18.8882	17.767	16.5693	17.8846	17.6609	18.1264	NA	17.8426
Neb_A0A571BF58_T7171_1	Neb	A0A571BF58	T7171	1	NA	NA	NA	18.1589	NA	NA	NA	NA	NA	NA	NA	NA	NA	NA	NA	17.8868	NA	NA	NA	NA	NA	NA	NA	NA	NA	NA	NA	NA	NA	NA	NA	NA	NA	NA	NA	NA	NA	NA	NA	NA	NA	17.6483	NA	NA	NA
Neb_A0A571BF58_T7174_2	Neb	A0A571BF58	T7174	2	16.8051	17.1743	17.2595	17.5445	15.1536	NA	16.8916	17.5971	18.2878	15.8863	16.6655	17.3923	17.2956	NA	NA	16.682	17.8535	17.4038	17.3087	15.4691	18.0672	17.9025	15.4589	NA	17.3798	17.3307	16.7523	18.1518	15.3662	16.081	NA	15.4392	17.0538	18.1249	16.7719	15.2364	14.3392	15.8831	17.1676	17.1837	17.1862	17.2617	17.0757	16.5992	16.4275
Neb_A0A571BF58_T7169_2	Neb	A0A571BF58	T7169	2	16.8051	17.1743	16.651	17.5445	NA	NA	16.2261	16.9671	17.9233	NA	15.697	17.3923	16.844	NA	NA	16.0377	17.3058	16.7392	17.244	NA	17.2861	16.2227	NA	NA	16.4013	16.869	NA	17.4551	NA	16.081	NA	15.4392	16.5613	17.7927	15.8292	NA	NA	NA	17.1676	17.1837	17.1862	16.4734	17.0757	16.5992	16.4275
Neb_A0A571BF58_T7171_2	Neb	A0A571BF58	T7171	2	NA	NA	15.7205	NA	15.1536	NA	15.4555	16.0983	16.1247	15.8863	15.6332	NA	15.3998	NA	NA	15.209	16.1909	15.9658	12.7974	15.4691	16.8089	17.3627	15.4589	NA	16.358	15.4623	16.7523	16.7673	15.3662	NA	NA	NA	15.2638	15.8434	15.7122	15.2364	14.3392	15.8831	NA	NA	NA	16.0136	NA	NA	NA
Neb_A0A571BF58_T7112_1	Neb	A0A571BF58	T7112	1	15.6396	14.2696	NA	15.5292	15.5146	NA	15.218	11.8025	11.1721	15.2729	NA	10.4944	14.4614	11.6784	NA	NA	14.5404	16.1261	16.9143	17.154	17.002	14.92	14.5592	16.4074	NA	14.5547	14.2688	15.7944	15.1369	16.3922	16.2205	15.2812	16.2326	NA	14.7631	15.2018	14.9068	14.6753	13.5874	16.5175	15.8052	11.7588	10.6916	11.4268	15.1646
Neb_A0A571BF58_S4970_1	Neb	A0A571BF58	S4970	1	NA	NA	NA	NA	NA	NA	NA	NA	NA	NA	NA	15.3115	NA	NA	NA	15.3948	NA	NA	NA	NA	NA	NA	NA	NA	NA	NA	NA	NA	NA	NA	NA	NA	NA	NA	NA	NA	NA	NA	NA	NA	NA	NA	NA	NA	NA
Neb_A0A571BF58_S5140_1	Neb	A0A571BF58	S5140	1	NA	14.6237	13.2163	13.0731	14.067	14.0439	13.5139	14.1459	14.0245	13.8586	14.1948	14.1392	14.1759	14.1674	NA	14.2306	14.3363	14.5834	14.3911	14.5249	13.7001	13.1345	14.6989	14.6946	14.7175	14.4538	13.8029	14.9559	14.7345	14.9237	14.4925	14.167	14.3031	14.7496	14.3089	13.4046	13.8014	14.6789	14.4144	13.542	12.8831	12.8866	14.4145	13.4592	13.5264
Neb_A0A571BF58_S5144_1	Neb	A0A571BF58	S5144	1	12.7495	NA	NA	11.1688	NA	NA	NA	NA	NA	14.867	13.9899	NA	10.9465	13.5314	14.6339	NA	NA	13.3728	13.3642	NA	14.8731	NA	NA	14.5325	NA	NA	NA	NA	NA	NA	NA	NA	NA	NA	13.9661	NA	NA	NA	NA	NA	NA	NA	NA	NA	NA
Neb_A0A571BF58_T6430_1	Neb	A0A571BF58	T6430	1	NA	NA	NA	NA	NA	NA	NA	NA	NA	NA	NA	NA	18.023	NA	NA	NA	NA	NA	NA	NA	NA	NA	NA	NA	NA	NA	NA	NA	NA	NA	NA	NA	NA	NA	NA	NA	NA	NA	NA	NA	NA	NA	NA	NA	NA
Neb_A0A571BF58_Y6424_1	Neb	A0A571BF58	Y6424	1	9.97952	9.82643	12.6975	NA	11.0978	12.6113	13.3625	13.7605	13.4617	13.3091	14.6945	14.1781	12.6876	13.0879	13.0435	14.4682	10.9418	13.8939	11.9375	13.5946	13.3511	13.5166	12.324	13.0162	13.4981	13.6523	11.122	13.1342	12.7574	14.2553	14.4575	13.406	12.8864	11.32	12.6664	10.7876	12.6515	11.1323	13.6391	14.0047	12.776	12.7824	12.499	13.0492	10.9505
Neb_A0A571BF58_S6423_1	Neb	A0A571BF58	S6423	1	14.0638	14.0334	NA	15.4583	13.3926	14.4792	NA	NA	NA	15.4662	NA	NA	14.3827	NA	NA	NA	14.277	14.3035	14.2665	14.516	14.9938	NA	NA	NA	14.0267	14.7928	NA	NA	NA	NA	NA	NA	13.508	14.5479	NA	14.2539	13.5413	NA	NA	NA	13.7926	NA	13.3932	14.0615	NA
Neb_A0A571BF58_T6425_1	Neb	A0A571BF58	T6425	1	NA	NA	NA	13.535	NA	NA	NA	NA	14.3284	NA	NA	14.2819	NA	NA	NA	NA	NA	NA	NA	NA	NA	NA	13.9727	NA	NA	NA	NA	NA	NA	14.1427	NA	14.0625	NA	14.3409	13.8569	NA	NA	14.4319	13.2729	NA	NA	NA	NA	NA	NA
Neb_A0A571BF58_T4679_1	Neb	A0A571BF58	T4679	1	13.7387	13.6026	NA	13.7917	13.2831	13.2169	13.3435	13.2775	13.6233	14.0891	13.6338	14.115	NA	13.1299	13.2972	13.2201	NA	14.2401	13.7831	13.8164	14.0532	NA	NA	14.1094	13.696	NA	13.8216	13.6185	14.0184	13.6987	13.8983	NA	NA	14.1605	13.6165	14.018	13.8151	14.0901	NA	13.2889	13.1433	12.2922	NA	12.9968	NA
Neb_A0A571BF58_Y549_1	Neb	A0A571BF58	Y549	1	15.4231	NA	NA	NA	15.5073	NA	15.1446	NA	NA	NA	NA	NA	NA	NA	NA	NA	NA	15.6776	15.0145	NA	NA	NA	NA	NA	14.3279	NA	NA	NA	NA	NA	NA	NA	NA	NA	15.6878	NA	NA	NA	NA	NA	13.4194	NA	15.1742	NA	NA
Neb_A0A571BF58_Y796_1	Neb	A0A571BF58	Y796	1	15.4231	NA	NA	NA	15.5073	NA	15.1446	NA	NA	NA	NA	NA	NA	NA	NA	NA	NA	15.6776	15.0145	NA	NA	NA	NA	NA	14.3279	NA	NA	NA	NA	NA	NA	NA	NA	NA	15.6878	NA	NA	NA	NA	NA	13.4194	NA	15.1742	NA	NA
Neb_A0A571BF58_Y7363_2	Neb	A0A571BF58	Y7363	2	NA	15.9708	NA	NA	NA	NA	NA	NA	NA	NA	NA	NA	15.2812	NA	NA	NA	NA	15.6096	NA	NA	NA	NA	NA	NA	NA	NA	NA	NA	NA	15.1509	NA	16.0663	15.5721	NA	15.2314	NA	NA	15.4033	NA	NA	NA	NA	15.3281	NA	15.4444
Neb_A0A571BF58_T7355_2	Neb	A0A571BF58	T7355	2	NA	15.9708	15.6354	16.0277	NA	NA	15.4592	15.0775	15.6696	NA	NA	NA	15.2812	NA	NA	NA	NA	15.6096	NA	NA	15.2915	15.8139	15.3116	NA	NA	NA	15.048	15.7231	NA	15.1509	15.3973	16.0663	16.5681	NA	15.2314	NA	14.9549	15.4033	NA	NA	16.5333	16.0969	15.3281	NA	16.3613
Neb_A0A571BF58_S7359_2	Neb	A0A571BF58	S7359	2	NA	NA	15.6354	16.0277	NA	NA	15.4592	15.0775	15.6696	NA	NA	NA	NA	NA	NA	NA	NA	NA	NA	NA	15.2915	15.8139	15.3116	NA	NA	NA	15.048	15.7231	NA	NA	15.3973	NA	15.5641	NA	NA	NA	14.9549	NA	NA	NA	16.5333	16.0969	NA	NA	15.2732
Neb_A0A571BF58_T114_1	Neb	A0A571BF58	T114	1	14.2343	14.7854	NA	13.4851	14.2761	14.0958	13.3321	13.7268	NA	NA	14.1851	14.2655	14.5091	NA	14.3601	NA	14.3769	NA	14.3997	14.3869	13.268	14.6733	14.4033	NA	14.3689	NA	NA	14.5722	NA	14.6971	14.4948	14.6444	14.8459	14.8661	14.6923	14.3633	NA	14.3809	NA	14.3289	NA	NA	14.4332	NA	13.18
Neb_A0A571BF58_S2943_1	Neb	A0A571BF58	S2943	1	14.6823	14.6724	NA	14.3996	NA	NA	14.43	14.4218	14.2997	NA	NA	14.4485	14.734	14.3755	NA	14.7059	NA	14.5009	NA	14.3333	14.1175	14.2716	NA	NA	14.0134	14.3067	14.2017	NA	NA	14.559	NA	14.7237	NA	NA	13.9747	14.2728	NA	NA	13.9362	NA	13.8696	NA	NA	14.037	13.9552
Neb_A0A571BF58_S3186_1	Neb	A0A571BF58	S3186	1	14.6823	14.6724	NA	14.3996	NA	NA	14.43	14.4218	14.2997	NA	NA	14.4485	14.734	14.3755	NA	14.7059	NA	14.5009	NA	14.3333	14.1175	14.2716	NA	NA	14.0134	14.3067	14.2017	NA	NA	14.559	NA	14.7237	NA	NA	13.9747	14.2728	NA	NA	13.9362	NA	13.8696	NA	NA	14.037	13.9552
Neb_A0A571BF58_S3429_1	Neb	A0A571BF58	S3429	1	14.6823	14.6724	NA	14.3996	NA	NA	14.43	14.4218	14.2997	NA	NA	14.4485	14.734	14.3755	NA	14.7059	NA	14.5009	NA	14.3333	14.1175	14.2716	NA	NA	14.0134	14.3067	14.2017	NA	NA	14.559	NA	14.7237	NA	NA	13.9747	14.2728	NA	NA	13.9362	NA	13.8696	NA	NA	14.037	13.9552
Neb_A0A571BF58_S2939_1	Neb	A0A571BF58	S2939	1	NA	NA	NA	13.371	NA	NA	NA	NA	13.7762	NA	13.4591	NA	NA	NA	NA	NA	NA	13.7711	NA	NA	NA	13.7944	13.3612	NA	13.2298	13.6619	NA	14.0015	13.5826	NA	NA	NA	NA	NA	NA	NA	NA	NA	NA	13.3222	NA	NA	13.7785	13.0013	NA
Neb_A0A571BF58_S3182_1	Neb	A0A571BF58	S3182	1	NA	NA	NA	13.371	NA	NA	NA	NA	13.7762	NA	13.4591	NA	NA	NA	NA	NA	NA	13.7711	NA	NA	NA	13.7944	13.3612	NA	13.2298	13.6619	NA	14.0015	13.5826	NA	NA	NA	NA	NA	NA	NA	NA	NA	NA	13.3222	NA	NA	13.7785	13.0013	NA
Neb_A0A571BF58_S3425_1	Neb	A0A571BF58	S3425	1	NA	NA	NA	13.371	NA	NA	NA	NA	13.7762	NA	13.4591	NA	NA	NA	NA	NA	NA	13.7711	NA	NA	NA	13.7944	13.3612	NA	13.2298	13.6619	NA	14.0015	13.5826	NA	NA	NA	NA	NA	NA	NA	NA	NA	NA	13.3222	NA	NA	13.7785	13.0013	NA
Neb_A0A571BF58_S4168_1	Neb	A0A571BF58	S4168	1	16.2745	16.2038	16.1226	16.12	15.9772	16.0197	15.6972	16.4937	16.4242	16.3428	15.8207	16.5043	16.6996	14.9252	16.0403	16.3592	16.8451	16.1957	16.102	16.123	16.0334	15.7351	15.1481	16.2644	16.022	16.013	16.1567	16.5949	15.586	16.5584	15.3979	16.3405	15.4967	16.3774	16.3207	15.7632	15.5995	16.2297	15.363	15.7223	15.1065	14.5506	15.7614	15.7841	15.1755
Neb_A0A571BF58_S6354_1	Neb	A0A571BF58	S6354	1	10.9464	NA	NA	11.9216	11.4816	12.3073	13.0349	12.9386	12.1899	11.8391	12.2621	NA	13.6282	12.957	12.0764	12.9599	15.3122	NA	NA	7.2948	11.2753	11.6561	11.7853	12.431	11.6115	12.0077	NA	12.2053	NA	12.2382	12.6813	10.139	13.6915	12.4103	10.8026	NA	13.5711	NA	11.2159	11.397	11.3115	10.5336	11.0726	11.3141	NA
Neb_A0A571BF58_T1154_1	Neb	A0A571BF58	T1154	1	13.6427	NA	14.5985	13.2277	13.4626	NA	NA	13.6356	NA	NA	13.4171	NA	NA	NA	13.6075	NA	NA	14.565	14.33	13.6686	NA	NA	NA	NA	13.9483	14.2254	NA	NA	NA	14.5656	14.5949	13.6342	NA	NA	NA	NA	NA	14.192	15.7719	NA	NA	NA	NA	NA	NA
Neb_A0A571BF58_S1152_1	Neb	A0A571BF58	S1152	1	NA	NA	NA	NA	NA	14.705	14.8599	NA	13.6162	NA	NA	NA	12.0648	NA	NA	NA	14.6822	NA	NA	14.1887	NA	14.3407	14.7118	NA	NA	NA	14.5608	14.1514	14.4146	NA	NA	NA	NA	14.2794	NA	NA	NA	NA	NA	13.4632	NA	NA	NA	NA	12.781
Neb_A0A571BF58_S1238_1	Neb	A0A571BF58	S1238	1	15.2012	14.0687	14.7537	15.4072	14.5551	14.1778	15.3544	14.8952	14.8174	13.9624	14.9477	15.2613	15.2344	15.2127	14.5601	13.548	15.1161	15.4114	NA	NA	NA	NA	NA	NA	NA	NA	NA	NA	NA	NA	NA	NA	NA	NA	NA	NA	NA	NA	NA	14.3316	14.7574	15.1601	NA	15.3843	15.3125
Neb_A0A571BF58_Y1165_1	Neb	A0A571BF58	Y1165	1	NA	NA	NA	NA	NA	NA	NA	NA	NA	NA	NA	NA	NA	NA	NA	NA	NA	NA	NA	NA	NA	NA	NA	NA	NA	NA	NA	NA	NA	NA	NA	NA	8.22393	NA	NA	NA	NA	NA	NA	NA	NA	NA	NA	NA	NA
Neb_A0A571BF58_T1164_1	Neb	A0A571BF58	T1164	1	NA	NA	NA	NA	NA	12.8621	12.3287	NA	NA	NA	NA	NA	NA	NA	NA	NA	NA	NA	NA	NA	NA	NA	NA	NA	NA	NA	NA	NA	NA	NA	NA	NA	NA	NA	NA	NA	NA	NA	12.2052	NA	NA	NA	NA	NA	NA
Neb_A0A571BF58_S990_1	Neb	A0A571BF58	S990	1	NA	NA	NA	NA	NA	12.2932	NA	12.5954	NA	NA	NA	12.6796	NA	NA	NA	NA	NA	14.1656	13.8802	13.4617	13.525	NA	13.5403	13.2101	NA	13.5745	13.8359	NA	11.3187	NA	11.2564	NA	NA	11.8739	NA	NA	NA	NA	NA	11.9152	NA	NA	NA	NA	NA
Neb_A0A571BF58_S7390_3	Neb	A0A571BF58	S7390	3	19.2913	19.3227	16.9375	17.6003	19.224	19.0992	10.182	17.3749	16.9669	17.6964	16.9323	18.7297	19.2984	16.9142	16.4689	16.5287	18.0478	NA	17.7259	17.3188	NA	13.112	17.5159	16.6353	17.5095	15.9371	16.1622	16.5338	16.9302	18.9753	NA	19.0778	18.9442	16.8203	19.1936	19.329	19.3947	18.6597	18.5648	17.4249	16.5189	NA	19.0004	17.0178	NA
Neb_A0A571BF58_S3672_1	Neb	A0A571BF58	S3672	1	13.0849	NA	NA	13.1584	NA	NA	NA	NA	NA	NA	NA	NA	NA	NA	NA	12.0715	NA	13.278	NA	12.9663	NA	NA	NA	NA	NA	13.0977	NA	11.3735	11.3473	NA	13.158	NA	NA	NA	NA	NA	NA	NA	NA	12.8835	NA	NA	NA	NA	NA
Neb_A0A571BF58_S3668_1	Neb	A0A571BF58	S3668	1	NA	NA	NA	NA	NA	12.5109	NA	NA	NA	NA	12.1732	NA	NA	NA	NA	NA	12.3598	NA	NA	NA	NA	NA	NA	11.3577	NA	NA	NA	12.3887	NA	NA	NA	NA	NA	NA	NA	NA	14.8334	NA	13.1719	NA	NA	NA	NA	NA	NA
Neb_A0A571BF58_S3569_1	Neb	A0A571BF58	S3569	1	NA	12.6128	NA	NA	11.046	13.0211	NA	12.5489	12.6772	11.8678	NA	NA	11.3411	12.569	NA	NA	11.9028	NA	NA	11.4181	NA	12.0662	11.0764	11.9319	10.8903	12.2976	NA	NA	NA	NA	NA	10.4477	NA	11.7537	NA	NA	NA	NA	NA	NA	NA	NA	NA	NA	NA
Neb_A0A571BF58_S7034_1	Neb	A0A571BF58	S7034	1	NA	NA	NA	NA	NA	NA	NA	NA	NA	NA	NA	NA	NA	NA	NA	NA	NA	NA	NA	NA	NA	NA	NA	NA	NA	NA	NA	NA	NA	NA	NA	NA	NA	NA	11.3155	NA	NA	NA	NA	NA	11.1466	NA	NA	NA	NA
Neb_A0A571BF58_T2249_1	Neb	A0A571BF58	T2249	1	12.2222	12.8701	11.5066	11.9902	12.6199	12.3758	11.2841	12.8988	9.92361	12.3275	12.0873	11.3876	10.7986	12.1316	10.0966	11.2903	12.3258	13.7327	12.5577	NA	12.4053	12.3758	11.8986	12.2656	13.0073	11.9047	11.5401	12.3559	12.3897	10.9331	11.9567	10.4383	9.42459	13.1426	10.3159	10.8072	11.2426	9.60226	11.8603	11.0263	11.6353	9.81368	11.6941	10.7592	10.0158
Neb_A0A571BF58_S449_1	Neb	A0A571BF58	S449	1	17.3169	17.5971	17.3926	17.0194	17.5337	17.8521	17.41	17.0956	17.4388	17.5863	NA	NA	17.891	17.6331	17.5673	17.8622	NA	17.4618	17.413	17.3469	17.5586	17.3602	16.9684	17.2954	17.7127	17.6592	17.8179	17.4461	17.6262	18.0323	17.8526	18.1309	17.6165	18.2944	NA	17.8834	17.434	17.9042	16.7181	17.0854	17.0847	NA	17.1082	16.7061	16.7198
Neb_A0A571BF58_S7250_1	Neb	A0A571BF58	S7250	1	NA	NA	NA	NA	NA	NA	NA	NA	NA	NA	NA	NA	NA	NA	NA	NA	NA	NA	NA	NA	NA	NA	NA	NA	NA	NA	NA	NA	NA	NA	NA	NA	NA	NA	NA	NA	NA	NA	NA	NA	NA	NA	NA	NA	NA
Neb_A0A571BF58_S7484_1	Neb	A0A571BF58	S7484	1	19.2428	19.468	19.2384	18.9842	19.4905	19.1277	19.0697	18.9024	19.1056	19.5707	18.9733	18.6877	18.7171	19.247	19.1286	18.8649	19.6041	18.9757	13.8141	NA	NA	NA	NA	NA	NA	NA	NA	NA	NA	NA	NA	14.1334	NA	NA	NA	NA	NA	NA	18.3164	18.9241	19.0882	18.6931	19.0314	18.9529	18.8148
Neb_A0A571BF58_S641_1	Neb	A0A571BF58	S641	1	14.2245	14.8255	14.8708	14.0021	12.4766	15.0894	14.3788	13.7323	14.2274	NA	13.4962	13.1203	13.2283	14.1912	14.6616	NA	14.4476	NA	13.6711	12.7493	13.6952	12.7162	13.463	NA	12.9979	14.9151	NA	14.3844	12.3977	13.4839	13.1373	13.1501	14.3519	15.0141	NA	11.5671	13.6307	NA	13.5053	14.1489	NA	NA	12.3651	NA	NA
Neb_A0A571BF58_T1761_1	Neb	A0A571BF58	T1761	1	NA	NA	NA	NA	NA	NA	10.2977	NA	10.8451	12.4061	NA	11.3184	12.6669	NA	9.79814	NA	12.6561	NA	NA	NA	9.351	NA	NA	NA	NA	NA	10.9588	NA	NA	10.0532	NA	12.7858	10.3987	10.8667	10.3103	11.3762	10.8866	NA	NA	NA	NA	NA	NA	NA	NA
Plekhg1_A0A5F8MPP0_S689_1	Plekhg1	A0A5F8MPP0	S689	1	NA	NA	14.9478	15.6547	NA	NA	NA	14.9159	15.4368	15.6248	15.5951	15.6444	15.2675	15.3743	15.4539	15.5711	15.3882	15.8392	15.204	15.2032	14.4024	NA	15.3271	15.3701	14.8074	15.253	NA	15.6856	NA	15.5152	15.4636	14.7074	15.2814	15.4701	15.4637	NA	NA	15.3451	14.7656	14.736	14.7804	14.3363	14.5014	13.647	NA
Plekhg1_A0A5F8MPP0_S689_2	Plekhg1	A0A5F8MPP0	S689	2	12.5414	12.0777	12.71	5.07582	12.5464	12.9654	12.7682	13.2266	11.9925	NA	11.414	11.2039	NA	12.0931	12.152	12.1029	11.3204	NA	12.4779	NA	12.7807	12.6729	12.7157	9.2889	10.2567	11.6515	NA	12.775	12.8236	NA	NA	NA	NA	9.45492	11.8698	NA	NA	NA	12.9354	7.30776	12.1748	12.2505	11.1835	11.5231	12.321
Plekhg1_A0A5F8MPP0_S688_2	Plekhg1	A0A5F8MPP0	S688	2	12.5414	12.0777	12.71	5.07582	12.5464	12.9654	12.7682	13.2266	11.9925	NA	11.414	11.2039	NA	12.0931	12.152	12.1029	11.3204	NA	12.4779	NA	12.7807	12.6729	12.7157	9.2889	10.2567	11.6515	NA	12.775	12.8236	NA	NA	NA	NA	9.45492	11.8698	NA	NA	NA	12.9354	7.30776	12.1748	12.2505	11.1835	11.5231	12.321
Fndc1_A0A6I8MWX0_S970_1	Fndc1	A0A6I8MWX0	S970	1	16.0622	16.6448	16.6731	NA	16.5277	16.4451	15.8562	NA	NA	16.0399	NA	15.4497	16.4254	NA	16.0345	16.5144	16.3048	15.9127	16.8812	16.9074	17.1347	16.5506	NA	16.2518	16.7413	16.9999	17.1807	16.9197	16.4128	17.2491	NA	17.147	16.3968	16.7604	17.3005	16.7568	16.7072	17.0058	16.1681	16.0125	16.0061	15.4999	16.0407	16.2339	15.632
Fndc1_A0A6I8MWX0_S971_1	Fndc1	A0A6I8MWX0	S971	1	NA	NA	NA	NA	NA	NA	NA	15.9742	NA	NA	NA	NA	NA	15.5301	NA	NA	NA	NA	NA	NA	NA	NA	NA	NA	NA	NA	NA	NA	NA	NA	NA	NA	NA	NA	NA	16.7468	NA	NA	NA	NA	NA	15.4958	NA	NA	NA
Fndc1_A0A6I8MWX0_T492_1	Fndc1	A0A6I8MWX0	T492	1	NA	NA	NA	15.6061	15.6777	NA	NA	NA	NA	NA	15.3089	NA	NA	NA	NA	15.5943	15.3616	NA	NA	NA	NA	NA	NA	NA	NA	NA	NA	NA	NA	NA	NA	NA	NA	NA	16.2387	15.714	NA	16.2464	NA	NA	NA	13.9226	14.8039	NA	NA
Fndc1_A0A6I8MWX0_S489_1	Fndc1	A0A6I8MWX0	S489	1	NA	15.5484	NA	NA	NA	NA	NA	NA	NA	NA	NA	NA	NA	NA	NA	NA	NA	NA	NA	NA	NA	NA	NA	NA	NA	NA	NA	NA	NA	NA	NA	NA	NA	NA	NA	NA	NA	NA	NA	NA	NA	NA	NA	NA	NA
Fndc1_A0A6I8MWX0_S488_1	Fndc1	A0A6I8MWX0	S488	1	15.5566	NA	16.0138	NA	NA	15.4766	15.6095	15.6907	15.7015	15.3588	NA	13.434	16.0354	15.3608	15.2275	13.7837	13.6374	15.7097	16.3862	16.3431	16.7026	16.0351	15.9858	16.0577	16.282	16.5633	16.8272	16.4374	NA	16.3453	16.0986	15.9565	15.4118	15.8849	16.2055	NA	15.7066	NA	15.4804	12.361	14.9491	NA	NA	15.3025	14.4433
Fndc1_A0A6I8MWX0_T693_2	Fndc1	A0A6I8MWX0	T693	2	NA	NA	NA	18.003	NA	NA	NA	NA	16.9372	NA	17.3437	NA	NA	17.238	NA	NA	17.4594	17.5727	NA	NA	18.0606	NA	NA	NA	NA	NA	17.8568	NA	NA	17.7877	NA	17.2906	17.1622	NA	17.7564	NA	17.3228	NA	NA	17.0038	16.8906	17.1746	17.3588	NA	NA
Fndc1_A0A6I8MWX0_S692_2	Fndc1	A0A6I8MWX0	S692	2	17.7146	17.8138	17.9663	18.003	17.9413	17.8418	17.4497	17.679	NA	18.0788	18.1899	17.3203	17.5465	17.238	17.1037	17.4054	17.4594	17.5727	18.091	17.9653	18.0606	17.5911	17.8505	17.8048	17.6773	18.1382	NA	17.996	17.7345	NA	17.864	17.3577	NA	17.851	NA	17.4037	17.3228	17.8545	17.9208	NA	NA	17.1746	NA	17.4668	17.0642
Fndc1_A0A6I8MWX0_S694_2	Fndc1	A0A6I8MWX0	S694	2	17.7146	17.8138	17.9663	NA	17.9413	17.8418	17.4497	17.679	16.9372	17.2467	NA	17.3203	17.5465	NA	17.1037	17.4054	NA	NA	18.091	17.9653	NA	17.5911	17.8505	17.8048	17.6773	18.1382	17.8568	17.996	17.7345	17.7877	17.864	17.2906	17.1622	17.851	17.7564	17.4037	NA	17.8545	17.9208	17.0038	16.8906	NA	17.3588	17.4668	NA
Fndc1_A0A6I8MWX0_S689_2	Fndc1	A0A6I8MWX0	S689	2	NA	NA	NA	NA	NA	NA	NA	NA	NA	NA	NA	NA	NA	NA	NA	NA	NA	NA	NA	NA	NA	NA	NA	NA	NA	NA	NA	NA	NA	NA	NA	NA	NA	NA	NA	NA	NA	NA	NA	NA	NA	NA	NA	NA	NA
Fndc1_A0A6I8MWX0_S691_2	Fndc1	A0A6I8MWX0	S691	2	NA	NA	NA	NA	NA	NA	NA	NA	NA	16.8888	17.0178	NA	NA	NA	NA	NA	NA	NA	NA	NA	NA	NA	NA	NA	NA	NA	NA	NA	NA	NA	NA	17.3577	NA	NA	NA	NA	NA	NA	NA	NA	NA	NA	NA	NA	17.0642
Fndc1_A0A6I8MWX0_S694_1	Fndc1	A0A6I8MWX0	S694	1	14.6315	NA	NA	NA	NA	NA	NA	NA	NA	NA	NA	14.5388	NA	NA	NA	NA	NA	14.7414	NA	NA	14.49	NA	NA	NA	14.3582	NA	NA	14.1871	NA	14.9851	NA	14.6284	NA	14.5968	NA	14.3619	NA	14.7282	NA	NA	NA	NA	NA	NA	NA
Fndc1_A0A6I8MWX0_T693_1	Fndc1	A0A6I8MWX0	T693	1	NA	14.2862	14.4171	NA	14.7958	14.5129	13.7855	NA	NA	NA	14.5065	NA	14.3247	14.3694	NA	14.3854	14.5114	NA	14.6977	14.519	NA	13.9294	NA	14.3365	NA	14.5422	14.5775	NA	NA	14.9667	NA	NA	14.6645	NA	15.3003	NA	14.1188	NA	14.8063	14.6826	NA	13.7905	14.7706	14.6259	14.3851
Fndc1_A0A6I8MWX0_S691_1	Fndc1	A0A6I8MWX0	S691	1	NA	NA	NA	NA	NA	NA	NA	NA	NA	14.3447	NA	NA	NA	NA	NA	NA	NA	NA	NA	NA	NA	NA	NA	NA	NA	NA	NA	NA	NA	NA	NA	NA	NA	NA	NA	NA	NA	NA	NA	NA	NA	NA	NA	NA	NA
Fndc1_A0A6I8MWX0_S699_3	Fndc1	A0A6I8MWX0	S699	3	NA	NA	NA	NA	NA	NA	NA	NA	NA	NA	NA	9.9035	11.9842	NA	NA	NA	11.7929	NA	NA	NA	NA	NA	NA	NA	NA	NA	NA	NA	NA	NA	NA	NA	NA	NA	NA	11.6093	NA	NA	12.6273	NA	NA	NA	NA	11.6202	11.7173
Fndc1_A0A6I8MWX0_S694_3	Fndc1	A0A6I8MWX0	S694	3	NA	NA	NA	NA	NA	NA	NA	NA	NA	NA	NA	9.9035	11.9842	NA	NA	NA	11.7929	NA	NA	NA	NA	NA	NA	NA	NA	NA	NA	NA	NA	NA	NA	NA	NA	NA	NA	11.6093	NA	NA	12.6273	NA	NA	NA	NA	11.6202	11.7173
Fndc1_A0A6I8MWX0_T693_3	Fndc1	A0A6I8MWX0	T693	3	NA	NA	NA	NA	NA	NA	NA	NA	NA	NA	NA	9.9035	11.9842	NA	NA	NA	11.7929	NA	NA	NA	NA	NA	NA	NA	NA	NA	NA	NA	NA	NA	NA	NA	NA	NA	NA	11.6093	NA	NA	12.6273	NA	NA	NA	NA	11.6202	11.7173
Fndc1_A0A6I8MWX0_T747_1	Fndc1	A0A6I8MWX0	T747	1	NA	NA	NA	NA	NA	NA	NA	NA	NA	NA	NA	NA	NA	NA	NA	NA	NA	NA	NA	NA	NA	NA	NA	NA	NA	NA	NA	NA	NA	NA	NA	NA	NA	NA	NA	NA	NA	NA	NA	NA	NA	NA	NA	NA	NA
Fndc1_A0A6I8MWX0_S750_1	Fndc1	A0A6I8MWX0	S750	1	18.2785	18.0552	17.9802	18.6856	18.4064	17.7316	18.0754	17.9504	17.9419	18.0622	17.8547	17.6569	17.642	17.72	17.819	17.9738	17.679	18.4993	18.872	18.2535	18.6899	17.5622	18.025	18.0495	18.5025	18.3677	18.176	17.8136	18.1314	17.8869	17.7235	17.5449	17.9169	18.2734	17.8338	17.4418	17.6498	18.0953	17.6849	17.4806	17.1869	16.9055	17.3427	17.3126	17.1811
Fndc1_A0A6I8MWX0_S756_2	Fndc1	A0A6I8MWX0	S756	2	NA	15.6955	NA	15.3358	13.1321	13.6651	15.0052	NA	13.8335	14.7979	13.1117	13.0308	NA	NA	NA	NA	15.4261	13.1466	NA	13.461	NA	13.4062	NA	15.855	NA	13.6947	13.5048	13.8972	14.2517	15.2165	15.1815	14.2896	15.7615	15.4763	14.3178	15.4139	16.3789	15.3246	13.8857	14.4801	NA	13.1503	13.5601	NA	12.7925
Fndc1_A0A6I8MWX0_S750_2	Fndc1	A0A6I8MWX0	S750	2	NA	NA	NA	14.4159	NA	14.3151	13.9173	NA	14.2127	NA	NA	NA	12.3992	NA	NA	11.8514	14.8645	NA	15.1052	14.8483	14.0359	NA	15.1208	NA	14.7356	13.6947	14.4894	NA	14.0261	NA	15.1498	NA	NA	14.8827	NA	14.5428	15.8952	16.748	NA	NA	14.8115	NA	NA	14.5147	NA
Fndc1_A0A6I8MWX0_T755_2	Fndc1	A0A6I8MWX0	T755	2	NA	15.6955	NA	14.251	13.1321	15.0264	14.0881	NA	15.0355	14.7979	13.1117	13.0308	12.3992	NA	NA	11.8514	13.7932	13.1466	15.1052	15.2164	14.0359	13.4062	15.1208	15.855	14.7356	NA	15.0796	13.8972	15.1433	15.2165	13.0375	14.2896	15.7615	13.9084	14.3178	14.2723	16.4247	17.2051	13.8857	14.4801	14.8115	13.1503	13.5601	14.5147	12.7925
Fndc1_A0A6I8MWX0_T747_2	Fndc1	A0A6I8MWX0	T747	2	12.6243	NA	NA	NA	NA	NA	NA	NA	NA	13.0984	NA	NA	NA	NA	NA	NA	NA	NA	9.38904	NA	NA	NA	13.3472	NA	NA	NA	NA	NA	NA	NA	NA	NA	NA	NA	NA	NA	NA	NA	NA	NA	NA	NA	NA	NA	NA
Fndc1_A0A6I8MWX0_S744_2	Fndc1	A0A6I8MWX0	S744	2	12.6243	NA	NA	NA	NA	NA	NA	NA	NA	13.0984	NA	NA	NA	NA	NA	NA	NA	NA	9.38904	NA	NA	NA	13.3472	NA	NA	NA	NA	NA	NA	NA	NA	NA	NA	NA	NA	NA	NA	NA	NA	NA	NA	NA	NA	NA	NA
Fndc1_A0A6I8MWX0_S542_2	Fndc1	A0A6I8MWX0	S542	2	15.5425	16.3794	NA	17.8811	16.5175	14.8841	14.5292	16.5449	14.5712	NA	NA	16.1597	15.903	14.529	16.1499	16.0456	14.8841	13.6397	16.5346	14.3082	17.1422	NA	15.2552	15.9398	NA	17.8181	17.031	16.5099	16.8468	16.4831	NA	16.372	NA	16.9667	15.3754	15.259	NA	15.3892	18.4782	NA	NA	17.5263	19.086	17.706	18.7945
Fndc1_A0A6I8MWX0_T535_2	Fndc1	A0A6I8MWX0	T535	2	NA	16.3794	14.9584	15.088	14.8629	16.0661	14.5292	14.699	16.0419	NA	15.9223	NA	16.6072	14.529	16.1499	16.0456	14.8841	13.6397	16.4601	14.3082	15.042	15.1378	15.2552	17.655	15.4937	17.8181	15.7865	15.1406	15.023	16.4831	NA	NA	16.7801	16.9667	15.3754	16.1149	16.5189	16.3425	17.3983	NA	NA	15.7167	19.1925	15.8129	18.3238
Fndc1_A0A6I8MWX0_S531_2	Fndc1	A0A6I8MWX0	S531	2	NA	15.8204	NA	17.6563	15.5326	NA	NA	NA	NA	NA	14.4703	14.9652	NA	NA	NA	14.8368	NA	16.8029	NA	NA	16.7591	NA	NA	NA	16.6689	NA	17.031	15.8037	NA	13.089	NA	13.5324	NA	NA	NA	NA	NA	NA	15.7522	NA	NA	NA	15.2506	NA	NA
Fndc1_A0A6I8MWX0_T532_2	Fndc1	A0A6I8MWX0	T532	2	15.5425	15.8204	14.9584	NA	16.7656	15.2276	NA	16.0746	15.3962	NA	16.3718	16.6827	17.2977	NA	NA	14.8368	NA	16.8029	17.0364	NA	NA	15.1378	NA	17.1311	17.1978	NA	15.7865	NA	16.3678	13.089	NA	16.5606	16.7801	NA	NA	14.9548	16.5189	15.2942	17.9177	NA	NA	17.0418	16.3172	17.2535	16.9498
Fndc1_A0A6I8MWX0_S531_1	Fndc1	A0A6I8MWX0	S531	1	NA	NA	NA	NA	NA	NA	NA	NA	NA	NA	13.2293	NA	NA	NA	NA	NA	NA	NA	NA	NA	NA	NA	NA	NA	NA	NA	NA	NA	NA	NA	NA	NA	NA	NA	NA	NA	NA	NA	NA	NA	NA	NA	NA	NA	NA
Fndc1_A0A6I8MWX0_T535_1	Fndc1	A0A6I8MWX0	T535	1	NA	14.2477	NA	NA	13.8562	NA	NA	NA	14.5411	NA	NA	14.0795	14.2893	NA	NA	NA	14.28	NA	NA	NA	NA	NA	NA	13.3868	NA	NA	14.6246	NA	13.534	14.7054	14.336	NA	NA	NA	14.756	14.8123	14.3343	14.9325	NA	NA	NA	14.1856	14.0976	14.0737	14.1756
Fndc1_A0A6I8MWX0_T532_1	Fndc1	A0A6I8MWX0	T532	1	NA	NA	NA	NA	NA	NA	NA	NA	NA	13.6325	NA	NA	NA	13.9351	NA	12.7752	NA	NA	NA	NA	13.4186	13.6827	NA	NA	NA	NA	NA	NA	NA	NA	NA	NA	14.8238	13.8796	NA	14.2997	NA	NA	NA	NA	NA	NA	NA	NA	NA
Fndc1_A0A6I8MWX0_T457_1	Fndc1	A0A6I8MWX0	T457	1	NA	NA	NA	NA	NA	NA	NA	NA	NA	NA	NA	NA	NA	NA	NA	NA	NA	NA	NA	NA	NA	NA	NA	NA	NA	NA	NA	NA	NA	NA	NA	NA	NA	NA	NA	NA	NA	NA	NA	NA	NA	NA	NA	NA	NA
Fndc1_A0A6I8MWX0_T453_1	Fndc1	A0A6I8MWX0	T453	1	NA	NA	13.8185	10.1815	NA	NA	NA	NA	10.3737	NA	12.7039	NA	NA	NA	12.7344	NA	NA	13.584	14.0242	12.0076	10.441	NA	12.7254	NA	12.7039	NA	NA	NA	NA	NA	12.688	NA	NA	13.4975	NA	NA	NA	13.1537	12.9474	NA	NA	NA	NA	NA	NA
Ahnak2_A0A7N9VR94_S597_1	Ahnak2	A0A7N9VR94	S597	1	16.9369	17.0665	17.3028	17.6945	16.5902	16.9753	16.6276	17.4007	17.1921	16.8381	17.0298	17.1222	16.8734	16.9027	17.0257	16.9553	16.8169	17.2284	16.8072	16.8729	16.9314	17.2093	16.8624	16.7002	17.0443	16.6812	16.7971	16.8047	16.7953	16.4462	16.495	15.9325	16.6443	16.7094	16.2854	16.6934	16.2837	16.3267	12.9827	13.545	13.3498	NA	12.9235	NA	9.4694
Ahnak2_A0A7N9VR94_S770_1	Ahnak2	A0A7N9VR94	S770	1	16.9369	17.0665	17.3028	17.6945	16.5902	16.9753	16.6276	17.4007	17.1921	16.8381	17.0298	17.1222	16.8734	16.9027	17.0257	16.9553	16.8169	17.2284	16.8072	16.8729	16.9314	17.2093	16.8624	16.7002	17.0443	16.6812	16.7971	16.8047	16.7953	16.4462	16.495	15.9325	16.6443	16.7094	16.2854	16.6934	16.2837	16.3267	12.9827	13.545	13.3498	NA	12.9235	NA	9.4694
Ahnak2_A0A7N9VR94_S943_1	Ahnak2	A0A7N9VR94	S943	1	16.9369	17.0665	17.3028	17.6945	16.5902	16.9753	16.6276	17.4007	17.1921	16.8381	17.0298	17.1222	16.8734	16.9027	17.0257	16.9553	16.8169	17.2284	16.8072	16.8729	16.9314	17.2093	16.8624	16.7002	17.0443	16.6812	16.7971	16.8047	16.7953	16.4462	16.495	15.9325	16.6443	16.7094	16.2854	16.6934	16.2837	16.3267	12.9827	13.545	13.3498	NA	12.9235	NA	9.4694
Ahnak2_A0A7N9VR94_S1116_1	Ahnak2	A0A7N9VR94	S1116	1	16.9369	17.0665	17.3028	17.6945	16.5902	16.9753	16.6276	17.4007	17.1921	16.8381	17.0298	17.1222	16.8734	16.9027	17.0257	16.9553	16.8169	17.2284	16.8072	16.8729	16.9314	17.2093	16.8624	16.7002	17.0443	16.6812	16.7971	16.8047	16.7953	16.4462	16.495	15.9325	16.6443	16.7094	16.2854	16.6934	16.2837	16.3267	12.9827	13.545	13.3498	NA	12.9235	NA	9.4694
Ahnak2_A0A7N9VR94_S1288_1	Ahnak2	A0A7N9VR94	S1288	1	16.9369	17.0665	17.3028	17.6945	16.5902	16.9753	16.6276	17.4007	17.1921	16.8381	17.0298	17.1222	16.8734	16.9027	17.0257	16.9553	16.8169	17.2284	16.8072	16.8729	16.9314	17.2093	16.8624	16.7002	17.0443	16.6812	16.7971	16.8047	16.7953	16.4462	16.495	15.9325	16.6443	16.7094	16.2854	16.6934	16.2837	16.3267	12.9827	13.545	13.3498	NA	12.9235	NA	9.4694
Ahnak2_A0A7N9VR94_S1461_1	Ahnak2	A0A7N9VR94	S1461	1	16.9369	17.0665	17.3028	17.6945	16.5902	16.9753	16.6276	17.4007	17.1921	16.8381	17.0298	17.1222	16.8734	16.9027	17.0257	16.9553	16.8169	17.2284	16.8072	16.8729	16.9314	17.2093	16.8624	16.7002	17.0443	16.6812	16.7971	16.8047	16.7953	16.4462	16.495	15.9325	16.6443	16.7094	16.2854	16.6934	16.2837	16.3267	12.9827	13.545	13.3498	NA	12.9235	NA	9.4694
Ahnak2_A0A7N9VR94_S1634_1	Ahnak2	A0A7N9VR94	S1634	1	16.9369	17.0665	17.3028	17.6945	16.5902	16.9753	16.6276	17.4007	17.1921	16.8381	17.0298	17.1222	16.8734	16.9027	17.0257	16.9553	16.8169	17.2284	16.8072	16.8729	16.9314	17.2093	16.8624	16.7002	17.0443	16.6812	16.7971	16.8047	16.7953	16.4462	16.495	15.9325	16.6443	16.7094	16.2854	16.6934	16.2837	16.3267	12.9827	13.545	13.3498	NA	12.9235	NA	9.4694
Ahnak2_A0A7N9VR94_S1807_1	Ahnak2	A0A7N9VR94	S1807	1	16.9369	17.0665	17.3028	17.6945	16.5902	16.9753	16.6276	17.4007	17.1921	16.8381	17.0298	17.1222	16.8734	16.9027	17.0257	16.9553	16.8169	17.2284	16.8072	16.8729	16.9314	17.2093	16.8624	16.7002	17.0443	16.6812	16.7971	16.8047	16.7953	16.4462	16.495	15.9325	16.6443	16.7094	16.2854	16.6934	16.2837	16.3267	12.9827	13.545	13.3498	NA	12.9235	NA	9.4694
Ahnak2_A0A7N9VR94_S1980_1	Ahnak2	A0A7N9VR94	S1980	1	16.9369	17.0665	17.3028	17.6945	16.5902	16.9753	16.6276	17.4007	17.1921	16.8381	17.0298	17.1222	16.8734	16.9027	17.0257	16.9553	16.8169	17.2284	16.8072	16.8729	16.9314	17.2093	16.8624	16.7002	17.0443	16.6812	16.7971	16.8047	16.7953	16.4462	16.495	15.9325	16.6443	16.7094	16.2854	16.6934	16.2837	16.3267	12.9827	13.545	13.3498	NA	12.9235	NA	9.4694
Ahnak2_A0A7N9VR94_S2153_1	Ahnak2	A0A7N9VR94	S2153	1	16.9369	17.0665	17.3028	17.6945	16.5902	16.9753	16.6276	17.4007	17.1921	16.8381	17.0298	17.1222	16.8734	16.9027	17.0257	16.9553	16.8169	17.2284	16.8072	16.8729	16.9314	17.2093	16.8624	16.7002	17.0443	16.6812	16.7971	16.8047	16.7953	16.4462	16.495	15.9325	16.6443	16.7094	16.2854	16.6934	16.2837	16.3267	12.9827	13.545	13.3498	NA	12.9235	NA	9.4694
Ahnak2_A0A7N9VR94_S2326_1	Ahnak2	A0A7N9VR94	S2326	1	16.9369	17.0665	17.3028	17.6945	16.5902	16.9753	16.6276	17.4007	17.1921	16.8381	17.0298	17.1222	16.8734	16.9027	17.0257	16.9553	16.8169	17.2284	16.8072	16.8729	16.9314	17.2093	16.8624	16.7002	17.0443	16.6812	16.7971	16.8047	16.7953	16.4462	16.495	15.9325	16.6443	16.7094	16.2854	16.6934	16.2837	16.3267	12.9827	13.545	13.3498	NA	12.9235	NA	9.4694
Ahnak2_A0A7N9VR94_S2499_1	Ahnak2	A0A7N9VR94	S2499	1	16.9369	17.0665	17.3028	17.6945	16.5902	16.9753	16.6276	17.4007	17.1921	16.8381	17.0298	17.1222	16.8734	16.9027	17.0257	16.9553	16.8169	17.2284	16.8072	16.8729	16.9314	17.2093	16.8624	16.7002	17.0443	16.6812	16.7971	16.8047	16.7953	16.4462	16.495	15.9325	16.6443	16.7094	16.2854	16.6934	16.2837	16.3267	12.9827	13.545	13.3498	NA	12.9235	NA	9.4694
Ahnak2_A0A7N9VR94_S503_1	Ahnak2	A0A7N9VR94	S503	1	18.1839	18.292	18.8494	18.777	18.0661	18.4296	17.604	18.2038	18.1279	18.2494	18.4495	18.5117	18.2395	18.4594	18.5672	18.3432	18.3837	18.2915	18.5764	18.7594	18.2979	18.2282	18.3773	18.0106	18.6939	18.2327	18.1611	18.1016	18.099	17.8813	18.3347	18.225	18.626	18.5739	18.1434	18.5327	18.3833	17.8374	11.4247	NA	NA	NA	NA	NA	NA
Ahnak2_A0A7N9VR94_S676_1	Ahnak2	A0A7N9VR94	S676	1	18.1839	18.292	18.8494	18.777	18.0661	18.4296	17.604	18.2038	18.1279	18.2494	18.4495	18.5117	18.2395	18.4594	18.5672	18.3432	18.3837	18.2915	18.5764	18.7594	18.2979	18.2282	18.3773	18.0106	18.6939	18.2327	18.1611	18.1016	18.099	17.8813	18.3347	18.225	18.626	18.5739	18.1434	18.5327	18.3833	17.8374	11.4247	NA	NA	NA	NA	NA	NA
Ahnak2_A0A7N9VR94_S849_1	Ahnak2	A0A7N9VR94	S849	1	18.1839	18.292	18.8494	18.777	18.0661	18.4296	17.604	18.2038	18.1279	18.2494	18.4495	18.5117	18.2395	18.4594	18.5672	18.3432	18.3837	18.2915	18.5764	18.7594	18.2979	18.2282	18.3773	18.0106	18.6939	18.2327	18.1611	18.1016	18.099	17.8813	18.3347	18.225	18.626	18.5739	18.1434	18.5327	18.3833	17.8374	11.4247	NA	NA	NA	NA	NA	NA
Ahnak2_A0A7N9VR94_S1022_1	Ahnak2	A0A7N9VR94	S1022	1	18.1839	18.292	18.8494	18.777	18.0661	18.4296	17.604	18.2038	18.1279	18.2494	18.4495	18.5117	18.2395	18.4594	18.5672	18.3432	18.3837	18.2915	18.5764	18.7594	18.2979	18.2282	18.3773	18.0106	18.6939	18.2327	18.1611	18.1016	18.099	17.8813	18.3347	18.225	18.626	18.5739	18.1434	18.5327	18.3833	17.8374	11.4247	NA	NA	NA	NA	NA	NA
Ahnak2_A0A7N9VR94_S1195_1	Ahnak2	A0A7N9VR94	S1195	1	18.1839	18.292	18.8494	18.777	18.0661	18.4296	17.604	18.2038	18.1279	18.2494	18.4495	18.5117	18.2395	18.4594	18.5672	18.3432	18.3837	18.2915	18.5764	18.7594	18.2979	18.2282	18.3773	18.0106	18.6939	18.2327	18.1611	18.1016	18.099	17.8813	18.3347	18.225	18.626	18.5739	18.1434	18.5327	18.3833	17.8374	11.4247	NA	NA	NA	NA	NA	NA
Ahnak2_A0A7N9VR94_S1367_1	Ahnak2	A0A7N9VR94	S1367	1	18.1839	18.292	18.8494	18.777	18.0661	18.4296	17.604	18.2038	18.1279	18.2494	18.4495	18.5117	18.2395	18.4594	18.5672	18.3432	18.3837	18.2915	18.5764	18.7594	18.2979	18.2282	18.3773	18.0106	18.6939	18.2327	18.1611	18.1016	18.099	17.8813	18.3347	18.225	18.626	18.5739	18.1434	18.5327	18.3833	17.8374	11.4247	NA	NA	NA	NA	NA	NA
Ahnak2_A0A7N9VR94_S1540_1	Ahnak2	A0A7N9VR94	S1540	1	18.1839	18.292	18.8494	18.777	18.0661	18.4296	17.604	18.2038	18.1279	18.2494	18.4495	18.5117	18.2395	18.4594	18.5672	18.3432	18.3837	18.2915	18.5764	18.7594	18.2979	18.2282	18.3773	18.0106	18.6939	18.2327	18.1611	18.1016	18.099	17.8813	18.3347	18.225	18.626	18.5739	18.1434	18.5327	18.3833	17.8374	11.4247	NA	NA	NA	NA	NA	NA
Ahnak2_A0A7N9VR94_S1713_1	Ahnak2	A0A7N9VR94	S1713	1	18.1839	18.292	18.7624	18.6783	18.0661	18.4296	17.604	18.2038	18.1279	18.2494	18.4495	18.5117	18.2395	18.4594	18.5672	18.3432	18.3837	18.2915	18.5764	18.7594	18.2979	18.2282	18.3773	18.0106	18.6939	18.2327	18.1611	18.1016	18.099	17.8813	18.3347	18.225	18.626	18.5739	18.1434	18.5327	18.3833	17.8374	11.4247	NA	NA	NA	NA	NA	NA
Ahnak2_A0A7N9VR94_S1886_1	Ahnak2	A0A7N9VR94	S1886	1	18.1839	18.292	18.8494	18.777	18.0661	18.4296	17.604	18.2038	18.1279	18.2494	18.4495	18.5117	18.2395	18.4594	18.5672	18.3432	18.3837	18.2915	18.5764	18.7594	18.2979	18.2282	18.3773	18.0106	18.6939	18.2327	18.1611	18.1016	18.099	17.8813	18.3347	18.225	18.626	18.5739	18.1434	18.5327	18.3833	17.8374	11.4247	NA	NA	NA	NA	NA	NA
Ahnak2_A0A7N9VR94_S2059_1	Ahnak2	A0A7N9VR94	S2059	1	18.1839	18.292	18.8494	18.777	18.0661	18.4296	17.604	18.2038	18.1279	18.2494	18.4495	18.5117	18.2395	18.4594	18.5672	18.3432	18.3837	18.2915	18.5764	18.7594	18.2979	18.2282	18.3773	18.0106	18.6939	18.2327	18.1611	18.1016	18.099	17.8813	18.3347	18.225	18.626	18.5739	18.1434	18.5327	18.3833	17.8374	11.4247	NA	NA	NA	NA	NA	NA
Ahnak2_A0A7N9VR94_S2232_1	Ahnak2	A0A7N9VR94	S2232	1	18.1839	18.292	18.8494	18.777	18.0661	18.4296	17.604	18.2038	18.1279	18.2494	18.4495	18.5117	18.2395	18.4594	18.5672	18.3432	18.3837	18.2915	18.5764	18.7594	18.2979	18.2282	18.3773	18.0106	18.6939	18.2327	18.1611	18.1016	18.099	17.8813	18.3347	18.225	18.626	18.5739	18.1434	18.5327	18.3833	17.8374	11.4247	NA	NA	NA	NA	NA	NA
Ahnak2_A0A7N9VR94_S2405_1	Ahnak2	A0A7N9VR94	S2405	1	18.1839	18.292	18.8494	18.777	18.0661	18.4296	17.604	18.2038	18.1279	18.2494	18.4495	18.5117	18.2395	18.4594	18.5672	18.3432	18.3837	18.2915	18.5764	18.7594	18.2979	18.2282	18.3773	18.0106	18.6939	18.2327	18.1611	18.1016	18.099	17.8813	18.3347	18.225	18.626	18.5739	18.1434	18.5327	18.3833	17.8374	11.4247	NA	NA	NA	NA	NA	NA
Ahnak2_A0A7N9VR94_S3383_1	Ahnak2	A0A7N9VR94	S3383	1	15.0339	15.7117	17.026	16.9635	15.3085	15.0323	14.5868	16.2937	16.3443	16.7694	13.9513	14.2215	17.7975	15.8161	16.8027	16.015	14.5815	15.6026	17.0917	16.4725	16.3867	16.566	15.4556	16.1957	17.3624	15.5687	NA	NA	16.4319	16.7014	NA	15.7493	14.4119	15.9323	15.1822	14.7778	16.176	14.6123	NA	NA	NA	NA	NA	NA	NA
Ahnak2_A0A7N9VR94_T3380_1	Ahnak2	A0A7N9VR94	T3380	1	15.5061	NA	NA	NA	NA	NA	NA	NA	NA	NA	NA	15.9138	NA	NA	NA	NA	13.2602	NA	NA	NA	NA	NA	NA	NA	NA	NA	NA	15.858	NA	NA	NA	NA	14.5488	NA	NA	16.2519	NA	NA	NA	NA	NA	NA	NA	NA	NA
Ahnak2_A0A7N9VR94_S286_1	Ahnak2	A0A7N9VR94	S286	1	20.1471	20.0994	20.2806	20.7382	19.6395	19.9162	19.2831	20.0265	20.0861	20.3034	19.6509	20.0873	20.0028	19.7863	20.3233	19.9332	19.6675	19.5523	20.373	20.1967	20.3079	20.2541	19.8608	19.7895	20.4449	19.7439	19.968	20.2002	19.9112	20.3507	19.8077	19.4013	19.3892	19.7278	19.7719	20.0252	19.7545	19.7249	12.5109	NA	NA	NA	11.6226	NA	12.6351
Ahnak2_A0A7N9VR94_T292_2	Ahnak2	A0A7N9VR94	T292	2	NA	NA	15.2116	NA	NA	NA	NA	15.6004	NA	14.4773	NA	15.2327	15.2337	14.3672	15.4136	15.0945	NA	15.054	14.2749	15.8517	14.8079	15.6338	14.7328	NA	15.339	NA	NA	15.3199	14.8513	14.9185	15.9045	15.6041	15.3169	14.639	14.683	15.1435	15.7195	14.5331	NA	NA	NA	NA	NA	NA	NA
Ahnak2_A0A7N9VR94_T288_2	Ahnak2	A0A7N9VR94	T288	2	16.1217	15.4972	NA	15.7941	NA	NA	NA	NA	NA	NA	NA	NA	NA	NA	NA	NA	NA	NA	15.33	NA	NA	NA	NA	NA	NA	NA	NA	NA	NA	NA	NA	NA	NA	NA	NA	NA	14.9975	NA	NA	NA	NA	NA	NA	NA	NA
Ahnak2_A0A7N9VR94_S286_2	Ahnak2	A0A7N9VR94	S286	2	16.8621	15.4972	15.2116	16.9817	15.6973	NA	13.9876	16.3376	NA	15.4995	NA	15.2327	15.2337	14.3672	16.0928	15.0945	NA	15.054	16.4296	15.8517	15.9456	15.6338	14.7328	14.4861	16.1142	NA	NA	15.3199	14.8513	15.7407	15.9045	15.6041	15.3169	14.639	14.683	15.1435	14.3748	14.5331	NA	NA	NA	NA	NA	NA	NA
Ahnak2_A0A7N9VR94_T290_1	Ahnak2	A0A7N9VR94	T290	1	NA	NA	NA	NA	NA	NA	NA	NA	NA	NA	NA	NA	NA	NA	NA	NA	NA	NA	NA	NA	NA	NA	NA	NA	NA	NA	NA	NA	NA	NA	NA	NA	NA	NA	NA	NA	NA	NA	NA	NA	NA	NA	NA	NA	12.3996
Ahnak2_A0A7N9VR94_T290_2	Ahnak2	A0A7N9VR94	T290	2	15.5454	NA	NA	14.9301	15.6973	NA	13.9876	15.0161	NA	NA	NA	NA	NA	NA	NA	NA	NA	NA	NA	NA	15.0713	NA	NA	14.4861	NA	NA	NA	NA	NA	NA	NA	NA	NA	NA	NA	NA	NA	NA	NA	NA	NA	NA	NA	NA	NA
Ahnak2_A0A7N9VR94_S289_2	Ahnak2	A0A7N9VR94	S289	2	NA	NA	NA	15.3367	NA	NA	NA	NA	NA	14.5214	NA	NA	NA	NA	14.6796	NA	NA	NA	14.7341	NA	NA	NA	NA	NA	14.8479	NA	NA	NA	NA	14.5378	NA	NA	NA	NA	NA	NA	NA	NA	NA	NA	NA	NA	NA	NA	NA
Ahnak2_A0A7N9VR94_S2766_1	Ahnak2	A0A7N9VR94	S2766	1	14.815	15.3768	15.0394	15.8918	15.2984	15.3084	15.082	15.5934	15.2127	15.263	15.008	15.1451	15.2978	15.6079	15.3934	15.1674	15.0861	15.0853	14.6482	15.2161	15.2741	15.2322	14.7339	14.7358	15.3532	15.3247	14.8433	15.1539	15.098	14.4843	15.0755	14.6458	14.4185	14.4525	14.6945	14.8558	14.61	14.4912	NA	NA	10.0207	NA	NA	NA	NA
Ahnak2_A0A7N9VR94_S3202_1	Ahnak2	A0A7N9VR94	S3202	1	14.042	14.4747	14.8646	15.201	14.5382	14.8168	14.0663	14.5885	14.3438	14.1873	14.4778	14.4299	14.0323	14.2439	14.4671	14.2705	14.5636	14.9356	14.8421	14.3621	14.1124	14.7363	14.3014	14.5322	14.6869	14.7257	13.5903	14.4369	14.361	13.9519	14.4528	NA	14.2763	14.3849	14.6281	14.0745	14.4741	14.474	NA	NA	NA	NA	NA	NA	11.3437
Ahnak2_A0A7N9VR94_T540_1	Ahnak2	A0A7N9VR94	T540	1	17.0017	17.528	17.8482	18.1225	NA	13.553	NA	16.938	16.9997	17.5	NA	16.6845	15.95	12.1423	17.3463	NA	15.4284	NA	17.7952	17.7856	17.8948	17.226	16.5733	17.0638	18.0597	NA	NA	12.8614	15.5984	17.6632	NA	NA	NA	17.0568	NA	18.2621	NA	NA	NA	NA	NA	NA	NA	NA	NA
Ahnak2_A0A7N9VR94_T713_1	Ahnak2	A0A7N9VR94	T713	1	17.0017	17.528	17.8482	18.1225	NA	13.553	NA	16.938	16.9997	17.5	NA	16.6845	15.95	12.1423	17.3463	NA	15.4284	NA	17.7952	17.7856	17.8948	17.226	16.5733	17.0638	18.0597	NA	NA	12.8614	15.5984	17.6632	NA	NA	NA	17.0568	NA	18.2621	NA	NA	NA	NA	NA	NA	NA	NA	NA
Ahnak2_A0A7N9VR94_T886_1	Ahnak2	A0A7N9VR94	T886	1	17.0017	17.528	17.8482	18.1225	NA	13.553	NA	16.938	16.9997	17.5	NA	16.6845	15.95	12.1423	17.3463	NA	15.4284	NA	17.7952	17.7856	17.8948	17.226	16.5733	17.0638	18.0597	NA	NA	12.8614	15.5984	17.6632	NA	NA	NA	17.0568	NA	17.3492	NA	NA	NA	NA	NA	NA	NA	NA	NA
Ahnak2_A0A7N9VR94_T1059_1	Ahnak2	A0A7N9VR94	T1059	1	17.0017	17.528	17.8482	18.1225	NA	13.553	NA	16.938	16.9997	17.5	NA	16.6845	15.95	12.1423	17.3463	NA	15.4284	NA	17.7952	17.7856	17.8948	17.226	16.5733	17.0638	18.0597	NA	NA	12.8614	15.5984	17.6632	NA	NA	NA	17.0568	NA	18.2621	NA	NA	NA	NA	NA	NA	NA	NA	NA
Ahnak2_A0A7N9VR94_T1232_1	Ahnak2	A0A7N9VR94	T1232	1	17.0017	17.528	17.8482	18.1225	NA	13.553	NA	16.938	16.9997	17.5	NA	16.6845	15.95	12.1423	17.3463	NA	15.4284	NA	17.7952	17.7856	17.8948	17.226	16.5733	17.0638	18.0597	NA	NA	12.8614	15.5984	17.6632	NA	NA	NA	17.0568	NA	18.2621	NA	NA	NA	NA	NA	NA	NA	NA	NA
Ahnak2_A0A7N9VR94_T1404_1	Ahnak2	A0A7N9VR94	T1404	1	17.0017	17.528	17.8482	18.1225	NA	13.553	NA	16.938	16.9997	17.5	NA	16.6845	15.95	12.1423	17.3463	NA	15.4284	NA	17.7952	17.7856	17.8948	17.226	16.5733	17.0638	18.0597	NA	NA	12.8614	15.5984	17.6632	NA	NA	NA	17.0568	NA	18.2621	NA	NA	NA	NA	NA	NA	NA	NA	NA
Ahnak2_A0A7N9VR94_T1577_1	Ahnak2	A0A7N9VR94	T1577	1	17.0017	17.528	17.8482	18.1225	NA	13.553	NA	16.938	16.9997	17.5	NA	16.6845	15.95	12.1423	17.3463	NA	15.4284	NA	17.7952	17.7856	17.8948	17.226	16.5733	17.0638	18.0597	NA	NA	12.8614	15.5984	17.6632	NA	NA	NA	17.0568	NA	18.2621	NA	NA	NA	NA	NA	NA	NA	NA	NA
Ahnak2_A0A7N9VR94_T2096_1	Ahnak2	A0A7N9VR94	T2096	1	17.0017	17.528	17.8482	18.1225	NA	13.553	NA	16.938	16.9997	17.5	NA	16.6845	15.95	12.1423	17.3463	NA	15.4284	NA	17.7952	17.7856	17.8948	17.226	16.5733	17.0638	18.0597	NA	NA	12.8614	15.5984	17.6632	NA	NA	NA	17.0568	NA	17.3492	NA	NA	NA	NA	NA	NA	NA	NA	NA
Ahnak2_A0A7N9VR94_S2834_1	Ahnak2	A0A7N9VR94	S2834	1	14.9241	NA	14.572	15.1755	15.7314	15.3374	15.1211	15.1508	NA	NA	NA	NA	NA	NA	NA	NA	NA	NA	NA	NA	NA	NA	13.375	NA	NA	NA	NA	NA	NA	NA	NA	NA	NA	NA	NA	NA	NA	NA	NA	NA	NA	NA	NA	NA	NA
Ahnak2_A0A7N9VR94_S2832_1	Ahnak2	A0A7N9VR94	S2832	1	13.5084	13.5527	14.3085	14.836	NA	NA	NA	13.6018	NA	NA	NA	NA	NA	NA	14.0718	NA	NA	12.1501	14.8563	14.0104	14.7342	NA	NA	NA	14.8118	NA	NA	NA	NA	NA	NA	NA	NA	NA	NA	14.3387	13.8361	NA	NA	NA	NA	NA	NA	NA	NA
Ahnak2_A0A7N9VR94_T1750_1	Ahnak2	A0A7N9VR94	T1750	1	16.1321	16.5522	16.425	17.0385	14.882	14.4074	13.5321	16.0576	15.8742	16.2149	13.934	16.1426	15.389	14.8207	16.0491	14.3027	14.1241	14.9927	16.8194	16.5729	16.7149	16.0161	15.6136	15.8838	16.9314	15.285	15.0437	15.6719	14.7406	16.379	14.2614	13.9161	13.8816	14.8516	14.2048	16.7746	15.9405	13.4764	NA	NA	NA	NA	NA	NA	NA
Ahnak2_A0A7N9VR94_T1923_1	Ahnak2	A0A7N9VR94	T1923	1	16.1321	16.5522	16.425	17.0385	14.882	14.4074	13.5321	16.0576	15.8742	16.2149	13.934	16.1426	15.389	14.8207	16.0491	14.3027	14.1241	14.9927	16.8194	16.5729	16.7149	16.0161	15.6136	15.8838	16.9314	15.285	15.0437	15.6719	14.7406	16.379	14.2614	13.9161	13.8816	14.8516	14.2048	16.7746	15.9405	13.4764	NA	NA	NA	NA	NA	NA	NA
Ahnak2_A0A7N9VR94_T2269_1	Ahnak2	A0A7N9VR94	T2269	1	16.1321	16.5522	16.425	17.0385	14.882	14.4074	13.5321	16.0576	15.8742	16.2149	13.934	16.1426	15.389	14.8207	16.0491	14.3027	14.1241	14.9927	16.8194	16.5729	16.7149	16.0161	15.6136	15.8838	16.9314	15.285	15.0437	15.6719	14.7406	16.379	14.2614	13.9161	13.8816	14.8516	14.2048	16.7746	15.9405	13.4764	NA	NA	NA	NA	NA	NA	NA
Ahnak2_A0A7N9VR94_T2442_1	Ahnak2	A0A7N9VR94	T2442	1	16.1321	16.5522	16.425	17.0385	14.882	14.4074	13.5321	16.0576	15.8742	16.2149	13.934	16.1426	15.389	14.8207	16.0491	14.3027	14.1241	14.9927	16.8194	16.5729	16.7149	16.0161	15.6136	15.8838	16.9314	15.285	15.0437	15.6719	14.7406	16.379	14.2614	13.9161	13.8816	14.8516	14.2048	16.7746	15.9405	13.4764	NA	NA	NA	NA	NA	NA	NA
Ahnak2_A0A7N9VR94_S54_1	Ahnak2	A0A7N9VR94	S54	1	NA	NA	NA	NA	NA	NA	NA	14.7272	NA	NA	NA	NA	NA	NA	NA	NA	NA	NA	14.7702	NA	NA	NA	NA	NA	15.4166	NA	NA	NA	NA	NA	NA	NA	NA	NA	NA	NA	NA	NA	NA	NA	NA	NA	NA	NA	NA
Ahnak2_A0A7N9VR94_S3186_1	Ahnak2	A0A7N9VR94	S3186	1	14.991	15.5427	15.5346	16.0952	13.1175	13.5974	NA	15.1416	15.4761	15.2034	13.1649	14.6904	14.0164	14.6917	15.34	13.7079	12.2206	12.9432	16.0287	15.0369	15.5715	14.7368	14.613	14.7453	15.4169	14.2458	13.3767	15.0087	13.7583	13.5749	13.7228	13.036	13.0777	13.1591	12.7493	14.9203	15.419	NA	NA	11.1363	NA	NA	NA	NA	12.193
Ahnak2_A0A7N9VR94_S101_2	Ahnak2	A0A7N9VR94	S101	2	NA	NA	NA	NA	NA	NA	NA	NA	NA	NA	NA	NA	NA	NA	NA	NA	NA	NA	NA	NA	NA	NA	NA	NA	NA	NA	NA	NA	NA	NA	NA	NA	NA	NA	NA	NA	NA	NA	NA	NA	NA	NA	NA	NA	NA
Ahnak2_A0A7N9VR94_S91_2	Ahnak2	A0A7N9VR94	S91	2	NA	NA	NA	NA	NA	NA	NA	NA	NA	NA	NA	NA	NA	NA	NA	NA	NA	NA	NA	NA	NA	NA	NA	NA	NA	NA	NA	NA	NA	NA	NA	NA	NA	NA	NA	NA	NA	NA	NA	NA	NA	NA	NA	NA	NA
Ahnak2_A0A7N9VR94_S94_2	Ahnak2	A0A7N9VR94	S94	2	NA	NA	NA	NA	NA	NA	NA	NA	NA	NA	NA	NA	NA	NA	NA	NA	NA	NA	NA	NA	NA	NA	NA	NA	NA	NA	NA	NA	NA	NA	NA	NA	NA	NA	NA	NA	NA	NA	NA	NA	NA	NA	NA	NA	NA
Ahnak2_A0A7N9VR94_T329_1	Ahnak2	A0A7N9VR94	T329	1	17.8435	22.5677	NA	NA	NA	NA	21.8315	22.2606	NA	NA	NA	22.5689	NA	22.5261	NA	NA	16.4282	NA	21.8798	22.004	NA	NA	NA	21.6221	NA	15.2527	NA	NA	18.4687	22.4154	18.2051	16.8705	16.9607	21.9163	22.121	22.3103	NA	22.0018	21.286	NA	21.8253	20.492	NA	17.6076	NA
Ahnak2_A0A7N9VR94_S326_1	Ahnak2	A0A7N9VR94	S326	1	NA	11.3918	14.4681	13.8838	NA	NA	NA	13.8805	NA	10.7181	NA	NA	NA	10.6607	NA	14.4348	NA	NA	NA	11.8498	NA	NA	NA	NA	NA	NA	NA	NA	NA	8.77332	NA	NA	NA	NA	NA	NA	NA	NA	NA	NA	NA	NA	NA	NA	NA
Ahnak2_A0A7N9VR94_S330_1	Ahnak2	A0A7N9VR94	S330	1	NA	NA	NA	NA	NA	NA	NA	NA	NA	NA	NA	NA	10.7164	NA	NA	NA	NA	NA	NA	NA	11.7208	NA	NA	NA	11.7217	NA	NA	NA	NA	NA	NA	11.0954	NA	NA	NA	NA	NA	NA	NA	NA	NA	NA	NA	NA	NA
Ahnak2_A0A7N9VR94_S272_1	Ahnak2	A0A7N9VR94	S272	1	NA	NA	14.1772	14.7709	NA	NA	NA	15.325	15.7637	NA	NA	NA	NA	NA	12.1256	NA	NA	NA	NA	NA	NA	NA	12.9738	NA	NA	14.0015	NA	NA	16.2818	NA	NA	14.8313	NA	14.3254	16.2231	NA	NA	14.631	NA	NA	NA	NA	NA	NA	NA
Ahnak2_A0A7N9VR94_S273_1	Ahnak2	A0A7N9VR94	S273	1	NA	NA	NA	NA	NA	NA	NA	NA	NA	NA	NA	NA	NA	NA	NA	NA	NA	NA	NA	NA	NA	NA	NA	NA	NA	NA	NA	NA	NA	NA	NA	NA	NA	NA	NA	NA	NA	NA	NA	NA	NA	NA	NA	NA	NA
Ahnak2_A0A7N9VR94_S270_1	Ahnak2	A0A7N9VR94	S270	1	NA	NA	NA	NA	NA	NA	NA	NA	NA	NA	13.7558	NA	NA	NA	NA	NA	14.9851	NA	NA	NA	NA	NA	NA	13.8487	NA	NA	NA	NA	NA	NA	NA	NA	NA	NA	NA	NA	NA	NA	NA	NA	NA	NA	NA	NA	NA
Ahnak2_A0A7N9VR94_S274_1	Ahnak2	A0A7N9VR94	S274	1	NA	NA	NA	NA	NA	NA	NA	NA	NA	NA	NA	NA	NA	NA	NA	NA	NA	NA	NA	NA	NA	NA	NA	NA	NA	13.0107	NA	NA	NA	NA	NA	NA	NA	NA	NA	NA	NA	NA	NA	NA	NA	NA	NA	NA	NA
Tbc1d25_A1A5B6_S560_1	Tbc1d25	A1A5B6	S560	1	15.8439	14.4648	14.9957	15.8019	14.7121	14.7651	15.9527	15.9635	15.9256	15.7477	15.8071	15.3985	14.9933	15.904	15.5143	15.3436	15.2283	15.5203	15.3574	14.4183	15.5476	15.6871	15.9465	15.9727	14.8298	14.8886	15.6348	15.7907	16.0155	15.419	15.6085	15.4625	15.5572	15.6934	15.7034	15.3882	15.6359	15.4608	16.6653	16.0954	15.7895	16.4322	16.5344	15.6632	15.4892
Tbc1d25_A1A5B6_T214_1	Tbc1d25	A1A5B6	T214	1	15.5569	13.89	13.9442	NA	15.6958	15.6006	NA	NA	NA	NA	NA	12.9353	13.6504	NA	14.3262	NA	13.5528	14.3371	14.6822	NA	NA	NA	NA	NA	14.6296	NA	NA	NA	NA	13.9981	NA	13.6707	14.1178	NA	NA	NA	15.0671	13.8023	15.1416	12.8301	NA	NA	13.1125	NA	NA
Krt24_A1L317_S468_1	Krt24	A1L317	S468	1	NA	NA	NA	NA	NA	NA	NA	NA	NA	NA	NA	NA	NA	NA	NA	NA	NA	NA	NA	10.3406	NA	NA	NA	NA	NA	NA	NA	NA	NA	NA	NA	NA	NA	NA	NA	NA	NA	NA	12.7761	NA	NA	NA	NA	12.6875	NA
Krt24_A1L317_S472_2	Krt24	A1L317	S472	2	NA	NA	NA	NA	NA	NA	NA	NA	NA	NA	NA	NA	NA	NA	NA	NA	NA	NA	NA	NA	NA	NA	NA	NA	10.6141	NA	NA	NA	NA	NA	NA	NA	NA	9.97686	NA	NA	NA	NA	NA	NA	NA	NA	NA	NA	NA
Krt24_A1L317_S468_2	Krt24	A1L317	S468	2	NA	NA	NA	NA	NA	NA	NA	NA	NA	NA	NA	NA	NA	NA	NA	NA	NA	NA	NA	NA	NA	NA	NA	NA	10.6141	NA	NA	NA	NA	NA	NA	NA	NA	9.97686	NA	NA	NA	NA	NA	NA	NA	NA	NA	NA	NA
Krt24_A1L317_S15_1	Krt24	A1L317	S15	1	NA	NA	NA	NA	NA	NA	NA	NA	NA	NA	NA	NA	NA	NA	NA	NA	NA	NA	NA	NA	NA	NA	NA	NA	NA	NA	NA	NA	NA	NA	NA	NA	NA	NA	NA	NA	NA	NA	NA	NA	NA	NA	NA	NA	NA
Slc9a6_A1L3P4_S700_1	Slc9a6	A1L3P4	S700	1	18.1168	17.7345	18.0804	18.0497	18.1381	18.0125	NA	17.0848	16.9401	17.8165	17.8572	18.028	18.0155	17.0426	17.7713	17.8503	17.2832	18.2296	18.22	17.6346	17.9845	17.7632	17.0211	16.7191	17.6286	17.8782	17.7758	17.7018	17.4932	18.1269	17.8244	18.1608	18.1273	18.1333	17.3633	17.978	17.6148	17.833	17.8178	17.8106	17.7431	17.4676	17.9576	17.7531	17.7537
Slc9a6_A1L3P4_T697_1	Slc9a6	A1L3P4	T697	1	NA	NA	NA	NA	NA	NA	17.0702	NA	NA	NA	NA	NA	NA	NA	NA	NA	16.1391	NA	NA	NA	NA	NA	NA	NA	NA	NA	NA	NA	NA	NA	NA	NA	NA	NA	NA	NA	NA	NA	NA	NA	NA	NA	NA	NA	NA
Slc9a6_A1L3P4_S693_1	Slc9a6	A1L3P4	S693	1	NA	16.5131	NA	NA	NA	NA	16.4905	16.3639	16.4036	NA	NA	NA	NA	16.2565	NA	NA	NA	NA	NA	16.689	NA	NA	15.9948	NA	16.4554	NA	NA	NA	NA	NA	NA	NA	NA	NA	16.2333	NA	16.36	NA	NA	16.0972	15.6144	15.6491	NA	15.6977	15.7649
Slc9a6_A1L3P4_S687_1	Slc9a6	A1L3P4	S687	1	14.9581	13.9258	13.3673	14.2389	15.0058	14.3676	8.33535	14.5855	14.4012	14.905	15.0868	14.5681	14.4335	15.0261	14.2988	14.7453	NA	13.832	13.9375	13.1894	NA	14.1454	14.3197	13.9347	14.0954	12.7308	13.9714	14.3761	14.7599	13.9623	14.6308	14.1833	14.1781	NA	14.0443	14.5027	14.4463	14.2424	16.2082	13.8072	12.4999	14.0696	15.919	NA	12.1143
Cul4b_A2A432_S149_1	Cul4b	A2A432	S149	1	NA	NA	NA	NA	NA	NA	NA	NA	NA	NA	NA	NA	NA	NA	NA	NA	NA	NA	NA	NA	NA	NA	16.3415	16.1184	NA	NA	NA	NA	NA	16.2791	NA	NA	NA	16.0119	15.7135	NA	NA	NA	NA	NA	NA	NA	NA	NA	NA
Cul4b_A2A432_S206_1	Cul4b	A2A432	S206	1	NA	NA	NA	NA	NA	NA	NA	NA	NA	NA	NA	NA	NA	NA	NA	NA	NA	NA	NA	NA	NA	NA	NA	NA	NA	NA	NA	NA	NA	NA	10.0642	NA	NA	NA	NA	NA	NA	NA	NA	NA	NA	NA	NA	NA	NA
Zmynd8_A2A484_S763_1	Zmynd8	A2A484	S763	1	NA	NA	NA	NA	NA	NA	21.2428	NA	NA	NA	NA	NA	NA	NA	NA	NA	NA	NA	NA	NA	NA	NA	NA	NA	NA	NA	NA	20.5471	21.2671	NA	NA	19.9254	NA	NA	NA	NA	NA	NA	NA	NA	NA	NA	NA	NA	20.9643
Zmynd8_A2A484_S758_1	Zmynd8	A2A484	S758	1	NA	NA	NA	NA	16.0446	NA	NA	NA	NA	NA	NA	NA	NA	NA	NA	NA	NA	16.369	NA	15.1876	NA	NA	NA	NA	NA	16.4141	NA	NA	NA	NA	NA	NA	NA	NA	NA	NA	NA	NA	NA	NA	NA	NA	16.8849	NA	NA
Zmynd8_A2A484_S674_1	Zmynd8	A2A484	S674	1	15.8009	15.8135	15.8573	16.0246	15.8181	15.6809	15.6786	15.6989	15.7529	15.7177	15.7209	15.914	15.8423	15.6777	15.8241	15.8581	15.4246	15.5903	15.6223	15.8622	16.0298	15.8869	15.9523	15.6658	15.5653	15.9625	16.1498	15.9612	15.6566	16.2342	15.8713	15.7449	15.0029	15.8033	15.8703	15.6489	15.6426	15.8423	15.1998	15.5384	15.264	15.3842	15.1742	15.2358	15.2741
Zmynd8_A2A484_S658_1	Zmynd8	A2A484	S658	1	17.0209	16.8411	16.9758	16.8418	16.9065	16.9137	14.4112	16.3375	16.537	16.9076	16.4151	16.7924	16.5531	16.7351	16.8297	16.5688	16.4396	17.1212	16.8279	16.8902	16.8451	16.624	16.692	16.2794	17.0894	16.714	16.9102	NA	16.5192	17.159	16.8081	16.5914	16.6667	16.745	16.5849	16.7262	16.6742	16.6835	16.7995	16.7579	16.265	16.3695	16.6663	16.1432	16.5419
Zmynd8_A2A484_S656_1	Zmynd8	A2A484	S656	1	NA	NA	NA	NA	NA	NA	16.4103	NA	NA	NA	NA	NA	NA	NA	NA	NA	NA	NA	NA	NA	NA	NA	NA	NA	NA	NA	NA	16.6744	NA	NA	NA	NA	NA	NA	NA	NA	NA	NA	NA	NA	NA	NA	NA	NA	NA
Zmynd8_A2A484_S661_2	Zmynd8	A2A484	S661	2	NA	NA	NA	NA	NA	NA	13.6171	NA	NA	NA	NA	NA	NA	NA	NA	NA	NA	NA	NA	NA	NA	NA	NA	NA	NA	NA	NA	NA	NA	NA	NA	NA	NA	NA	NA	NA	NA	NA	NA	14.0062	NA	NA	NA	NA	NA
Zmynd8_A2A484_S656_2	Zmynd8	A2A484	S656	2	NA	NA	NA	NA	NA	NA	13.6171	NA	NA	NA	NA	NA	NA	NA	NA	NA	NA	NA	NA	NA	NA	NA	NA	NA	NA	NA	NA	NA	NA	NA	NA	NA	NA	NA	NA	NA	NA	NA	NA	14.0062	NA	NA	NA	NA	NA
Zmynd8_A2A484_S492_1	Zmynd8	A2A484	S492	1	NA	15.5857	15.614	14.953	NA	NA	14.2936	NA	NA	NA	NA	NA	NA	NA	NA	NA	NA	NA	15.326	NA	NA	14.8597	NA	NA	NA	NA	NA	NA	NA	NA	NA	NA	NA	NA	NA	NA	NA	NA	15.215	NA	NA	14.6023	NA	NA	14.7248
Zmynd8_A2A484_S494_1	Zmynd8	A2A484	S494	1	14.8732	NA	NA	NA	15.5387	15.5573	12.08	15.0539	14.9113	NA	15.2379	14.9849	15.3684	14.8745	15.0726	15.448	15.4518	15.2132	15.3173	15.8998	NA	NA	15.0631	14.8643	15.6713	15.2811	14.7912	14.9736	15.171	15.3251	15.1737	15.0942	15.0415	15.1668	13.3655	14.963	15.0725	15.2793	NA	15.3675	14.5307	NA	15.4402	13.503	NA
Zmynd8_A2A484_S494_2	Zmynd8	A2A484	S494	2	NA	NA	14.332	14.7673	NA	NA	NA	NA	15.4602	NA	16.5692	15.4203	NA	15.8496	NA	NA	NA	NA	NA	13.2129	NA	NA	15.8732	15.7237	15.3742	NA	NA	14.8546	16.3608	16.2691	14.9906	15.6286	NA	16.5726	15.6585	NA	NA	16.2412	15.144	NA	15.725	15.3798	13.8955	14.6547	16.0709
Zmynd8_A2A484_S490_2	Zmynd8	A2A484	S490	2	14.0856	15.496	NA	14.7673	13.9536	NA	13.6847	14.2771	NA	NA	16.2983	NA	15.1564	NA	15.4019	15.9069	16.1157	NA	15.0403	NA	13.7679	NA	14.5981	NA	NA	15.6003	14.5512	14.8546	NA	NA	NA	15.0931	13.8804	14.8841	NA	12.3378	13.5859	NA	15.144	NA	15.1203	15.3798	NA	NA	15.342
Zmynd8_A2A484_S492_2	Zmynd8	A2A484	S492	2	14.0856	15.496	14.332	NA	13.9536	NA	13.6847	14.2771	15.4602	NA	16.8327	15.4203	15.1564	15.8496	15.4019	15.9069	16.1157	NA	15.0403	13.2129	13.7679	NA	15.1041	15.7237	15.3742	15.6003	14.5512	NA	16.3608	16.2691	14.9906	16.3856	13.8804	16.0367	15.6585	12.3378	13.5859	16.2412	NA	NA	14.1787	NA	13.8955	14.6547	14.7368
Arfgef2_A2A5R2_S276_1	Arfgef2	A2A5R2	S276	1	16.0833	16.2872	16.1699	16.118	16.2075	15.7547	15.9685	16.1022	16.3686	16.2025	16.5489	16.4748	16.3736	16.2937	16.352	16.6694	16.336	16.3787	16.0983	16.4336	16.4565	16.2781	16.1481	15.9559	16.069	16.5412	16.4172	16.4178	16.1107	16.5731	16.6997	16.5839	16.2106	16.1429	16.5255	16.5865	16.3502	16.6668	15.9842	15.8747	15.8163	15.7566	15.7283	15.5188	15.516
Arfgef2_A2A5R2_T224_1	Arfgef2	A2A5R2	T224	1	NA	NA	NA	NA	NA	NA	NA	NA	NA	NA	NA	NA	NA	NA	NA	NA	NA	NA	NA	NA	NA	NA	NA	NA	NA	NA	NA	NA	NA	NA	NA	NA	NA	NA	NA	NA	NA	NA	NA	NA	NA	NA	NA	NA	NA
Arfgef2_A2A5R2_S227_1	Arfgef2	A2A5R2	S227	1	20.1511	20.5753	20.7432	20.6035	20.24	20.766	13.9851	20.514	20.5584	20.443	20.6095	20.7203	20.637	20.2603	20.5242	20.6797	20.7009	20.8249	20.6997	21.0168	20.6678	20.4742	20.3519	20.2501	20.7548	20.7808	20.4013	20.4323	20.7361	20.6775	20.7151	20.7447	20.8295	20.6116	20.6566	20.4844	20.6833	20.8584	20.5246	20.3232	20.1447	20.1826	20.5448	20.1997	20.162
Arfgef2_A2A5R2_S227_2	Arfgef2	A2A5R2	S227	2	NA	15.9157	NA	NA	NA	15.2229	NA	14.7191	15.601	NA	NA	15.3818	NA	15.6709	14.5919	NA	NA	15.85	14.9711	15.2881	NA	NA	NA	NA	15.0798	NA	14.2649	14.8118	NA	NA	NA	NA	NA	NA	15.4459	NA	NA	NA	NA	NA	15.9961	NA	NA	16.2715	NA
Arfgef2_A2A5R2_S218_2	Arfgef2	A2A5R2	S218	2	15.0536	15.9157	15.178	14.8581	NA	16.2437	14.7078	14.7191	15.601	NA	16.0383	15.3818	15.2815	15.6709	14.5919	NA	15.6819	15.85	15.9624	15.2881	12.8781	14.1039	14.9068	NA	15.0798	14.5421	14.2649	14.8118	15.6527	15.0882	NA	15.2624	NA	16.0249	15.4459	14.9128	NA	NA	16.3951	NA	16.9435	16.4067	NA	16.2715	16.4453
Arfgef2_A2A5R2_T224_2	Arfgef2	A2A5R2	T224	2	15.0536	NA	15.178	14.8581	NA	15.2642	14.7078	NA	NA	NA	16.0383	NA	15.2815	NA	NA	NA	15.6819	NA	14.9536	NA	12.8781	14.1039	14.9068	NA	NA	14.5421	NA	NA	15.6527	15.0882	NA	15.2624	NA	16.0249	NA	14.9128	NA	NA	16.3951	NA	15.889	16.4067	NA	NA	16.4453
Arfgef2_A2A5R2_S1520_2	Arfgef2	A2A5R2	S1520	2	NA	13.3032	17.7045	12.5111	12.7336	12.2259	15.3411	12.957	NA	12.8629	13.4895	13.4931	17.6387	11.674	NA	17.5192	17.7399	15.683	13.1199	15.9988	NA	15.9533	15.914	15.9061	12.3187	12.8227	NA	18.3245	13.9264	14.7397	16.1874	13.6287	13.7385	NA	16.0025	14.3868	14.9118	16.045	14.363	18.075	14.2927	18.4746	18.3094	18.1618	18.447
Arfgef2_A2A5R2_S1518_2	Arfgef2	A2A5R2	S1518	2	17.4234	17.6001	17.9442	17.7033	16.8841	17.4791	17.6119	17.5024	17.6292	17.8164	17.9457	17.5453	17.9108	17.5359	17.4916	17.7091	18.0044	17.5221	17.9582	18.0576	17.8758	17.954	17.9612	17.9442	17.6008	17.5324	17.8153	18.3455	18.0402	17.9119	18.0087	17.9557	18.4795	18.2915	17.9568	17.7254	18.1358	17.9412	18.3309	18.2873	18.3492	18.3879	18.5645	18.4042	18.3726
Arfgef2_A2A5R2_S1521_2	Arfgef2	A2A5R2	S1521	2	17.4234	17.5247	15.8968	17.7423	16.8005	17.4407	17.4045	17.5629	17.6292	17.7691	17.8784	17.4556	15.3703	17.5605	17.4916	14.6902	15.4265	17.0491	18.0078	17.7468	17.8758	17.7102	17.5615	17.5416	17.6374	17.4762	17.8153	12.2314	17.9543	17.9348	17.5289	17.882	18.4245	18.2915	17.7033	17.7579	18.1313	17.4898	18.2356	15.9546	18.2598	14.3744	15.9394	15.7115	14.1314
Arfgef2_A2A5R2_S1518_1	Arfgef2	A2A5R2	S1518	1	16.3734	16.5889	16.3138	16.4014	16.5153	16.6302	16.52	16.63	16.647	16.679	16.8854	16.8414	16.7821	16.5772	16.7904	16.8465	16.6996	16.8427	16.7687	16.8918	16.7593	16.7477	16.7774	16.7128	16.6681	16.7901	16.4014	16.4377	17.0625	16.9629	17.0019	16.8156	16.8846	16.8782	16.9387	16.8608	16.7056	17.1986	16.1003	15.9877	16.0236	16.0137	15.9701	15.8024	15.848
Arfgef2_A2A5R2_S1521_1	Arfgef2	A2A5R2	S1521	1	NA	NA	NA	NA	NA	NA	NA	NA	NA	NA	NA	NA	NA	NA	NA	NA	NA	15.6216	NA	NA	NA	NA	NA	NA	NA	NA	NA	NA	NA	NA	NA	NA	NA	NA	NA	NA	NA	NA	NA	NA	NA	NA	NA	NA	NA
Arfgef2_A2A5R2_S353_1	Arfgef2	A2A5R2	S353	1	NA	NA	NA	NA	NA	NA	NA	NA	NA	NA	NA	NA	NA	NA	NA	NA	NA	NA	NA	NA	NA	NA	NA	NA	NA	NA	NA	NA	NA	NA	13.7293	NA	NA	NA	NA	NA	NA	NA	NA	NA	NA	NA	NA	NA	NA
Arfgef2_A2A5R2_T633_2	Arfgef2	A2A5R2	T633	2	NA	NA	NA	NA	13.3532	NA	NA	NA	NA	NA	NA	NA	NA	NA	NA	NA	NA	NA	NA	NA	NA	NA	NA	NA	NA	NA	NA	NA	NA	NA	NA	NA	15.2588	NA	NA	NA	NA	NA	NA	NA	NA	NA	NA	NA	12.9989
Arfgef2_A2A5R2_S631_2	Arfgef2	A2A5R2	S631	2	NA	NA	NA	NA	13.3532	NA	NA	NA	NA	NA	NA	NA	NA	NA	NA	NA	NA	NA	NA	NA	NA	NA	NA	NA	NA	NA	NA	NA	NA	NA	NA	NA	15.2588	NA	NA	NA	NA	NA	NA	NA	NA	NA	NA	NA	12.9989
Bptf_A2A654_S2462_1	Bptf	A2A654	S2462	1	19.5774	17.708	17.0291	17.3335	18.9003	18.2028	19.2487	19.792	NA	17.2905	NA	17.2181	16.9751	17.9086	17.8736	16.9295	17.139	17.6107	17.414	16.7449	16.7823	16.8273	18.3027	17.5743	17.5222	17.1886	16.8448	17.2584	18.4078	16.5031	16.7265	16.7876	16.8808	NA	16.7571	NA	16.9989	16.7226	18.2795	17.0842	17.6914	NA	17.6568	18.5619	16.9878
Bptf_A2A654_S1302_1	Bptf	A2A654	S1302	1	13.6036	13.6331	NA	13.5286	13.7634	13.3224	13.92	13.6814	13.5949	NA	13.9432	13.9835	13.9759	13.7396	14.0668	12.7311	13.9054	14.2021	13.8972	13.9431	NA	NA	13.7335	13.723	13.6229	14.0417	13.5795	13.5976	13.6762	13.4609	NA	14.2767	14.1772	13.6947	14.0197	13.9741	14.3028	13.8912	14.1991	14.4072	14.2174	13.9629	14.4275	13.7856	14.0019
Bptf_A2A654_S2468_1	Bptf	A2A654	S2468	1	15.9964	16.0048	16.0254	16.4586	16.0171	15.9367	15.9881	16.1034	16.1158	15.5654	16.0532	15.9075	NA	16.1707	15.1528	16.115	15.1014	16.1658	16.0884	16.0652	16.4527	16.0339	16.2278	16.0941	16.2682	16.1153	16.0764	16.5755	16.1626	16.1156	16.0768	15.9886	16.0425	16.4213	16.0366	16.0899	15.9275	15.9554	15.7055	15.6033	15.5594	15.536	15.3858	15.7917	15.7099
Bptf_A2A654_T2472_1	Bptf	A2A654	T2472	1	NA	NA	NA	NA	NA	NA	NA	NA	13.5993	NA	13.8507	NA	NA	NA	NA	NA	NA	13.6559	13.3538	NA	NA	NA	NA	NA	NA	NA	NA	NA	NA	14.8192	NA	NA	NA	9.92712	NA	NA	NA	NA	NA	NA	NA	NA	NA	NA	NA
Tanc2_A2A690_S1450_2	Tanc2	A2A690	S1450	2	NA	NA	NA	NA	NA	14.7384	NA	NA	NA	NA	NA	NA	NA	14.5762	NA	NA	NA	NA	NA	13.0625	NA	NA	NA	15.2477	NA	NA	NA	14.4691	NA	NA	NA	NA	NA	14.8534	NA	NA	NA	14.6763	NA	NA	NA	14.924	NA	14.4145	NA
Tanc2_A2A690_S1446_2	Tanc2	A2A690	S1446	2	NA	NA	NA	NA	NA	14.7384	NA	NA	NA	NA	NA	NA	NA	14.5762	NA	NA	NA	NA	NA	13.0625	NA	NA	NA	15.2477	NA	NA	NA	14.4691	NA	NA	NA	NA	NA	14.8534	NA	NA	NA	14.6763	NA	NA	NA	14.924	NA	14.4145	NA
Tanc2_A2A690_S1460_1	Tanc2	A2A690	S1460	1	NA	NA	NA	12.9854	NA	NA	NA	15.4037	15.7833	15.8105	NA	NA	15.9778	15.1949	NA	15.499	15.4803	NA	16.8377	12.8505	NA	NA	NA	15.4364	NA	NA	15.0863	15.5844	15.519	NA	17.6401	NA	15.2338	15.3918	16.9826	NA	16.1768	15.8048	NA	15.2209	15.6038	14.5074	15.6595	NA	14.7721
Tanc2_A2A690_S1462_1	Tanc2	A2A690	S1462	1	NA	NA	NA	NA	NA	NA	NA	NA	NA	NA	NA	NA	NA	NA	NA	NA	NA	NA	NA	NA	NA	NA	NA	NA	NA	NA	NA	NA	NA	NA	NA	NA	NA	NA	NA	NA	NA	NA	11.9919	NA	NA	NA	12.0429	NA	NA
Tanc2_A2A690_S1466_1	Tanc2	A2A690	S1466	1	NA	NA	NA	NA	NA	NA	NA	NA	NA	NA	NA	NA	NA	NA	NA	NA	NA	NA	NA	NA	NA	NA	NA	NA	NA	NA	NA	NA	NA	NA	NA	NA	NA	NA	13.1501	NA	NA	NA	NA	NA	NA	NA	NA	NA	NA
Tanc2_A2A690_S1538_2	Tanc2	A2A690	S1538	2	12.1436	NA	13.5982	14.7965	NA	NA	14.3907	12.8943	14.2816	NA	14.0307	13.3569	13.3945	14.4274	NA	NA	14.2857	NA	NA	14.5723	14.9393	15.0376	14.6214	14.4866	13.3227	14.6343	13.4889	13.3502	14.3914	11.6012	11.8055	NA	14.6669	13.7285	NA	NA	NA	NA	15.4154	NA	14.1968	15.1324	13.3083	13.6176	14.2473
Tanc2_A2A690_S1534_2	Tanc2	A2A690	S1534	2	12.1436	NA	13.5982	14.7965	NA	NA	14.3907	12.8943	14.2816	NA	14.0307	13.3569	13.3945	14.4274	NA	NA	14.2857	NA	NA	14.5723	14.9393	15.0376	14.6214	14.4866	13.3227	14.6343	13.4889	13.3502	14.3914	11.6012	11.8055	NA	14.6669	13.7285	NA	NA	NA	NA	15.4154	NA	14.1968	15.1324	13.3083	13.6176	14.2473
Gpatch8_A2A6A1_S735_1	Gpatch8	A2A6A1	S735	1	19.2318	19.5471	NA	18.7912	20.0001	19.3324	NA	19.4098	19.616	19.4583	18.9975	18.3183	17.9904	NA	NA	18.8941	NA	18.8693	19.4357	19.634	NA	19.0782	19.2498	19.6134	19.7527	NA	NA	20.0311	18.716	19.7852	19.3551	15.0893	19.3151	NA	17.8658	16.8893	16.3481	19.1842	17.7564	18.9496	18.9072	NA	18.3994	NA	NA
Gpatch8_A2A6A1_S733_1	Gpatch8	A2A6A1	S733	1	NA	NA	18.8626	18.7414	NA	17.4232	NA	NA	18.5279	NA	NA	18.3119	NA	18.8247	NA	NA	18.7889	NA	NA	NA	18.3958	17.0422	18.919	NA	17.056	18.7405	NA	NA	NA	19.248	17.8682	NA	NA	NA	18.4659	NA	18.0446	NA	16.8677	NA	NA	17.705	NA	17.4602	15.383
Gpatch8_A2A6A1_S735_2	Gpatch8	A2A6A1	S735	2	15.4963	15.878	15.9043	15.7299	15.9001	12.5848	15.8526	16.0524	15.9428	15.703	15.7587	15.9889	15.153	14.3182	16.0472	15.6021	16.1221	15.7598	16.1589	16.3308	15.6096	16.5635	16.7834	16.123	15.9767	16.2737	16.4624	16.1769	16.3026	15.5123	16.0059	15.8485	NA	16.499	16.0353	15.8614	16.0329	16.0079	15.0492	16.4037	16.5174	16.4967	16.5803	16.2991	16.0409
Gpatch8_A2A6A1_S733_2	Gpatch8	A2A6A1	S733	2	15.4963	15.878	15.9043	15.7299	15.9001	12.5848	15.8526	16.0524	15.9428	15.703	15.7587	15.9889	15.153	14.3182	16.0472	15.6021	16.1221	15.7598	16.1589	16.3308	15.6096	16.5635	16.7834	16.123	15.9767	16.2737	16.4624	16.1769	16.3026	15.5123	16.0059	15.8485	NA	16.499	16.0353	15.8614	16.0329	16.0079	15.0492	16.4037	16.5174	16.4967	16.5803	16.2991	16.0409
Gpatch8_A2A6A1_S648_1	Gpatch8	A2A6A1	S648	1	NA	NA	NA	13.0328	NA	NA	NA	NA	NA	NA	NA	NA	NA	NA	NA	NA	NA	NA	NA	13.5386	NA	NA	NA	NA	NA	NA	NA	13.6701	13.2642	NA	NA	NA	NA	NA	NA	13.6869	12.9382	NA	NA	NA	NA	NA	NA	NA	NA
Gpatch8_A2A6A1_S645_1	Gpatch8	A2A6A1	S645	1	NA	12.9991	NA	NA	NA	NA	12.6855	NA	NA	NA	NA	13.4534	NA	NA	NA	NA	NA	NA	NA	NA	NA	NA	13.3333	NA	NA	NA	NA	NA	13.1352	13.4498	NA	NA	NA	NA	13.8148	NA	NA	NA	NA	NA	NA	NA	12.6849	NA	NA
Gpatch8_A2A6A1_T650_1	Gpatch8	A2A6A1	T650	1	NA	NA	13.0669	NA	NA	NA	NA	13.1671	13.2528	NA	13.3957	NA	13.3291	13.1663	13.1137	NA	NA	NA	NA	NA	13.5289	NA	13.3207	13.251	NA	13.477	13.6534	NA	13.2566	NA	13.7169	13.7783	12.928	13.2072	NA	NA	NA	13.6697	NA	NA	NA	NA	NA	NA	13.3305
Gpatch8_A2A6A1_S1185_2	Gpatch8	A2A6A1	S1185	2	15.358	15.3329	15.2804	15.3549	15.2203	15.2811	15.2631	15.2991	15.3482	15.2079	14.8571	14.6845	15.0288	15.3897	15.1444	15.2621	15.3987	15.3484	15.4803	15.3462	15.3333	15.3128	15.23	15.3264	15.4392	15.3653	15.9557	15.5645	15.0983	15.3832	15.1735	15.2891	14.3954	15.3961	15.3981	15.2539	14.6537	15.3951	15.4189	15.5769	15.191	15.73	15.433	15.1497	15.2782
Gpatch8_A2A6A1_S1179_2	Gpatch8	A2A6A1	S1179	2	15.358	15.3329	15.2804	15.3549	15.2203	15.2811	15.2631	15.2991	15.3482	15.2079	14.8571	14.6845	15.0288	15.3897	15.1444	15.2621	15.3987	15.3484	15.4803	15.3462	15.3333	15.3128	15.23	15.3264	15.4392	15.3653	15.9557	15.5645	15.0983	15.3832	15.1735	15.2891	14.3954	15.3961	15.3981	15.2539	14.6537	15.3951	15.4189	15.5769	15.191	15.73	15.433	15.1497	15.2782
Gpatch8_A2A6A1_S451_1	Gpatch8	A2A6A1	S451	1	15.0409	14.9983	14.5015	14.7942	15.0748	14.8913	14.5747	14.8656	14.9162	14.5181	14.7126	14.6452	14.3521	14.5715	14.7334	14.787	14.8643	15.4094	15.1301	15.3347	15.2966	14.9384	14.8475	14.7345	15.3189	15.2795	15.2066	15.0723	14.7965	15.2271	15.0622	15.0539	14.3426	14.8682	15.2925	14.9623	14.4264	15.1885	14.5092	14.5833	14.2697	13.9358	13.9601	14.2024	14.3787
Gpatch8_A2A6A1_S753_1	Gpatch8	A2A6A1	S753	1	15.5475	15.506	17.2933	16.2582	15.8288	NA	17.2578	16.3106	15.4686	15.2632	16.1761	NA	15.6261	15.8432	15.5349	15.9568	16.0976	15.6146	15.6956	15.7964	17.4767	NA	15.689	15.8681	15.8201	17.5313	17.7494	16.5751	15.5577	16.4181	15.9109	15.5996	15.6104	16.2022	15.865	15.3431	15.5685	16.3343	15.3581	16.1048	16.6885	15.9208	15.4849	NA	15.8289
Gpatch8_A2A6A1_S1039_1	Gpatch8	A2A6A1	S1039	1	17.0073	16.9564	17.0573	17.104	16.9005	16.8672	16.8556	16.8015	16.8764	15.2175	16.8361	16.8025	16.9059	16.873	16.848	16.8261	16.9612	17.1909	17.3609	17.2418	17.1913	17.216	15.1362	16.9364	17.2191	17.2432	17.3734	17.1766	15.2694	17.1838	16.9851	14.7933	16.8706	15.1287	16.9341	16.73	16.8208	16.9667	16.3393	16.9706	16.7789	16.9155	16.7151	16.8346	16.7906
Gpatch8_A2A6A1_S1037_1	Gpatch8	A2A6A1	S1037	1	NA	NA	NA	NA	NA	NA	NA	NA	NA	16.3726	NA	NA	NA	NA	NA	NA	NA	NA	NA	NA	NA	NA	NA	NA	NA	NA	NA	NA	NA	NA	NA	NA	NA	NA	NA	NA	NA	NA	NA	NA	NA	NA	NA	NA	NA
Gpatch8_A2A6A1_S1039_2	Gpatch8	A2A6A1	S1039	2	15.9508	NA	NA	NA	15.6207	NA	10.5251	NA	NA	NA	NA	NA	NA	NA	NA	NA	14.5187	14.3143	14.5278	14.828	NA	14.262	NA	NA	NA	NA	NA	12.6939	NA	NA	NA	NA	NA	NA	NA	NA	14.9276	NA	13.9287	NA	14.4605	12.8913	6.73563	NA	NA
Gpatch8_A2A6A1_S1037_2	Gpatch8	A2A6A1	S1037	2	15.9508	NA	NA	13.7525	15.6207	NA	10.5251	14.7887	15.0152	15.1289	15.1734	15.0804	NA	14.9032	15.2511	15.1706	NA	14.3143	NA	14.828	14.8617	14.3392	14.5592	14.8821	14.8658	15.0851	14.7231	14.8	15.1133	14.9986	15.0955	14.4344	14.8193	NA	15.1349	14.821	15.8567	15.0616	13.9287	NA	14.4605	15.1935	6.73563	14.8262	14.8492
Gpatch8_A2A6A1_Y1035_2	Gpatch8	A2A6A1	Y1035	2	NA	NA	NA	13.7525	NA	NA	NA	14.7887	15.0152	15.1289	15.1734	15.0804	NA	14.9032	15.2511	15.1706	14.5187	NA	14.5278	NA	14.8617	15.3011	14.5592	14.8821	14.8658	15.0851	14.7231	14.4187	15.1133	14.9986	15.0955	14.4344	14.8193	NA	15.1349	14.821	14.7822	15.0616	NA	NA	NA	14.8665	NA	14.8262	14.8492
Gpatch8_A2A6A1_Y1035_1	Gpatch8	A2A6A1	Y1035	1	NA	NA	NA	10.3017	NA	NA	14.8229	14.6932	14.7961	14.9086	14.879	14.7878	14.8867	14.8434	14.8362	14.8927	14.7287	NA	15.0159	NA	NA	NA	14.8603	14.7147	NA	NA	NA	NA	14.8826	15.0683	14.6487	NA	NA	14.8295	NA	14.4675	NA	14.749	NA	NA	NA	NA	NA	NA	NA
Fam104a_A2A6P4_S82_1	Fam104a	A2A6P4	S82	1	NA	15.5406	NA	12.1257	NA	NA	12.6697	12.6368	11.4954	NA	NA	NA	15.0432	13.6829	15.2291	15.9023	16.2269	NA	15.682	16.4511	16.2268	16.7123	NA	NA	NA	NA	NA	16.4568	16.1858	16.8117	16.8504	16.2338	16.0912	16.3744	16.6852	15.6485	13.5208	16.6801	NA	11.5786	12.0818	NA	NA	NA	NA
Fam104a_A2A6P4_S64_2	Fam104a	A2A6P4	S64	2	18.2454	18.2378	17.6	17.9674	18.1999	18.398	18.002	17.957	18.0624	18.2029	18.2676	18.2827	18.372	17.9604	18.1667	18.464	18.4386	18.0574	18.2507	18.2261	17.5256	18.1807	18.1645	18.0098	18.3372	17.5492	18.2813	18.0436	18.1241	18.716	18.6014	18.5964	18.2065	18.2982	18.6701	18.6138	18.1455	18.5259	18.317	18.4998	18.241	17.1883	18.179	17.4452	18.6902
Fam104a_A2A6P4_S62_2	Fam104a	A2A6P4	S62	2	18.2454	18.2378	17.6	17.9674	18.1999	18.398	18.002	17.957	18.0624	18.2029	18.2676	18.2827	18.372	17.9604	18.1667	18.464	18.4386	18.0574	18.2507	18.2261	17.5256	18.1807	18.1645	18.0098	18.3372	17.5492	18.2813	18.0436	18.1241	18.716	18.6014	18.5964	18.2065	18.2982	18.6701	18.6138	18.1455	18.5259	18.317	18.4998	18.241	17.1883	18.179	17.4452	18.6902
Cdr2l_A2A6T1_S179_1	Cdr2l	A2A6T1	S179	1	NA	NA	14.8002	NA	NA	14.4553	NA	NA	NA	NA	NA	NA	NA	NA	NA	NA	NA	NA	NA	NA	NA	NA	NA	NA	NA	NA	NA	NA	NA	NA	NA	NA	NA	NA	NA	NA	NA	NA	NA	NA	NA	NA	NA	NA	NA
Cdr2l_A2A6T1_S180_1	Cdr2l	A2A6T1	S180	1	14.5824	NA	NA	NA	NA	NA	NA	NA	NA	NA	NA	NA	NA	NA	NA	NA	NA	NA	NA	NA	NA	NA	NA	NA	NA	NA	NA	NA	NA	NA	NA	NA	NA	NA	NA	NA	NA	NA	NA	NA	NA	NA	NA	NA	NA
Zmym4_A2A791_S121_1	Zmym4	A2A791	S121	1	16.9957	16.2181	16.7958	17.0556	16.6884	15.7756	16.2466	16.5089	16.5982	16.71	16.2478	16.2695	16.3282	16.4736	16.2292	16.1847	15.8628	16.1373	16.3531	15.8127	16.1585	16.2721	16.043	16.2251	15.6175	16.1741	16.3921	16.1234	16.3656	15.6308	16.0551	16.1725	16.2624	15.6009	16.0318	15.803	16.1707	16.1127	16.9884	16.7203	17.0828	17.052	16.6853	17.2	17.3177
Prdm2_A2A7B5_S792_1	Prdm2	A2A7B5	S792	1	NA	16.6617	16.9815	16.8307	16.3875	16.7287	16.2985	16.4257	16.5981	16.5204	16.3816	16.3349	16.5272	16.0934	16.2925	15.9434	16.4719	NA	16.5088	NA	16.6241	16.424	16.5386	16.2387	16.237	16.4724	16.2756	16.4277	16.2886	15.8471	16.4422	16.378	16.1415	16.1042	16.4655	16.4511	16.537	16.6664	16.249	16.5922	NA	16.3949	NA	16.4627	16.263
Prdm2_A2A7B5_S739_2	Prdm2	A2A7B5	S739	2	NA	NA	15.3353	15.5127	NA	15.3193	15.1253	NA	15.0823	15.1984	NA	16.482	NA	NA	16.6697	NA	NA	NA	NA	NA	NA	14.7965	NA	16.6008	NA	17.1728	14.9134	NA	NA	NA	16.8811	14.6517	NA	NA	14.7513	16.7144	NA	NA	NA	NA	15.4144	NA	NA	15.3797	NA
Prdm2_A2A7B5_S735_2	Prdm2	A2A7B5	S735	2	NA	NA	15.3353	15.5127	NA	15.3193	15.1253	NA	15.0823	15.1984	NA	16.482	NA	NA	16.6697	NA	NA	NA	NA	NA	NA	14.7965	NA	16.6008	NA	17.1728	14.9134	NA	NA	NA	16.8811	14.6517	NA	NA	14.7513	16.7144	NA	NA	NA	NA	15.4144	NA	NA	15.3797	NA
Prdm2_A2A7B5_S735_1	Prdm2	A2A7B5	S735	1	NA	NA	NA	NA	NA	12.9495	NA	NA	NA	NA	14.2776	NA	NA	NA	NA	NA	NA	NA	NA	NA	NA	NA	NA	NA	NA	NA	NA	NA	13.0555	NA	NA	NA	NA	NA	NA	NA	NA	NA	NA	13.4362	NA	NA	NA	NA	NA
Prdm2_A2A7B5_S638_1	Prdm2	A2A7B5	S638	1	13.2915	14.023	14.8003	14.0323	14.2329	14.3224	13.4452	13.6897	13.1559	13.9436	12.1624	13.7962	14.0734	13.9565	13.9215	13.5922	14.0082	14.463	14.6064	14.9037	14.9871	14.5894	13.5732	14.1121	14.744	14.7107	14.5462	13.3015	14.109	13.5772	14.196	13.7464	14.2456	13.9276	13.7127	13.8468	NA	NA	12.6437	14.5852	13.8975	13.9506	14.0298	13.805	14.4718
Rlf_A2A7F4_S631_1	Rlf	A2A7F4	S631	1	14.4057	NA	14.4612	NA	NA	NA	NA	NA	NA	NA	NA	NA	NA	NA	NA	NA	NA	NA	NA	NA	14.4843	NA	NA	NA	NA	NA	NA	NA	NA	NA	NA	NA	13.7815	NA	NA	NA	NA	NA	NA	NA	NA	NA	NA	14.8062	NA
Rlf_A2A7F4_T633_1	Rlf	A2A7F4	T633	1	NA	NA	NA	NA	NA	14.9115	NA	14.303	NA	NA	NA	NA	NA	NA	NA	NA	NA	NA	NA	NA	NA	NA	NA	NA	NA	14.428	NA	NA	NA	NA	NA	NA	NA	NA	NA	NA	NA	NA	15.0871	NA	NA	NA	NA	NA	14.1672
Kiaa1522_A2A7S8_S959_2	Kiaa1522	A2A7S8	S959	2	17.7425	18.3158	18.7998	15.4351	20.1697	21.557	17.5077	NA	18.5659	NA	18.8116	18.7104	NA	NA	19.5233	19.3551	18.1011	16.8349	18.5085	17.2863	NA	15.9215	18.655	NA	17.4916	16.5818	18.453	18.687	18.9807	18.0505	17.4353	NA	18.7683	19.3561	17.9067	NA	20.0113	18.4023	17.102	17.2874	20.57	19.8068	20.8528	19.9531	21.7108
Kiaa1522_A2A7S8_S952_2	Kiaa1522	A2A7S8	S952	2	17.7425	18.3158	18.7998	15.4351	21.6273	21.557	17.5077	NA	18.5659	14.9018	18.8116	18.7104	NA	NA	19.5233	19.9486	18.1011	16.8349	18.5085	17.2863	16.3242	16.7012	18.655	16.8345	17.4916	16.5818	18.453	18.687	18.9807	18.0505	17.4353	17.8181	19.0737	20.7153	17.9067	18.3575	20.3784	18.4023	17.102	17.2874	20.57	19.8068	21.2472	22.1399	21.7108
Kiaa1522_A2A7S8_S961_2	Kiaa1522	A2A7S8	S961	2	NA	NA	NA	NA	20.9741	NA	NA	NA	NA	14.9018	NA	NA	NA	NA	NA	18.3805	NA	NA	NA	NA	16.3242	15.4412	NA	16.8345	NA	NA	NA	NA	NA	NA	NA	17.8181	16.6837	20.0027	NA	18.3575	18.2243	NA	NA	NA	NA	NA	19.1834	21.7821	NA
Kiaa1522_A2A7S8_T845_2	Kiaa1522	A2A7S8	T845	2	NA	NA	NA	15.1081	NA	NA	14.193	NA	14.8775	NA	NA	NA	NA	NA	NA	NA	14.8232	NA	14.7167	NA	NA	14.1838	NA	NA	NA	14.5216	NA	14.4845	NA	NA	NA	NA	NA	NA	NA	14.3395	NA	NA	15.2	NA	NA	NA	14.9641	14.6036	NA
Kiaa1522_A2A7S8_S842_2	Kiaa1522	A2A7S8	S842	2	14.8562	14.3736	NA	15.1081	14.7095	14.3951	14.193	NA	14.8775	NA	14.1035	14.8048	14.248	14.4408	15.05	14.6993	15.6725	14.4924	14.7167	NA	NA	14.1838	14.7279	14.2281	14.8111	15.4245	14.5329	14.4845	14.4368	12.6196	14.9636	14.2917	14.5933	14.0833	15.1948	15.0524	14.5937	NA	15.2	14.8764	14.756	14.6876	14.9641	15.6228	15.0896
Kiaa1522_A2A7S8_S838_2	Kiaa1522	A2A7S8	S838	2	14.8562	14.3736	NA	NA	14.7095	14.3951	NA	NA	NA	NA	14.1035	14.8048	14.248	14.4408	15.05	14.6993	14.5041	14.4924	NA	NA	NA	NA	14.7279	14.2281	14.8111	14.3202	14.5329	NA	14.4368	12.6196	14.9636	14.2917	14.5933	14.0833	15.1948	13.6935	14.5937	NA	NA	14.8764	14.756	14.6876	NA	14.6418	15.0896
Kiaa1522_A2A7S8_S404_1	Kiaa1522	A2A7S8	S404	1	NA	NA	NA	NA	NA	NA	NA	NA	NA	NA	NA	NA	NA	NA	NA	NA	NA	NA	NA	NA	NA	NA	NA	NA	13.1062	NA	NA	NA	NA	NA	NA	NA	NA	NA	NA	NA	12.0971	NA	NA	NA	NA	NA	NA	NA	NA
Itgb4_A2A863_T1789_1	Itgb4	A2A863	T1789	1	16.7576	NA	NA	17.2669	15.7963	NA	15.6181	14.3839	15.6868	15.7972	14.757	NA	15.5634	14.9305	15.8843	14.9378	14.6257	16.2814	NA	NA	16.5892	16.3008	NA	NA	NA	NA	15.9966	NA	15.1176	NA	NA	NA	NA	15.621	15.1099	NA	16.1922	NA	15.5936	NA	13.6723	NA	NA	15.1487	NA
Itgb4_A2A863_S1787_1	Itgb4	A2A863	S1787	1	NA	16.5782	16.7992	NA	NA	NA	NA	NA	15.6729	NA	NA	15.853	15.3336	NA	NA	NA	14.6492	NA	16.9662	16.7422	NA	12.8232	NA	15.8927	17.134	15.2247	NA	NA	NA	16.3072	15.3197	NA	NA	NA	NA	15.8389	NA	15.4794	NA	15.4736	NA	15.9187	15.0261	NA	16.2286
Itgb4_A2A863_S1490_1	Itgb4	A2A863	S1490	1	15.63	15.9432	16.1266	16.759	14.4215	14.697	14.9205	15.733	15.9017	15.7091	NA	15.6123	15.0785	14.8156	15.7043	NA	14.4465	15.084	NA	16.0499	16.1897	15.7353	15.5629	15.6767	16.4357	15.2068	15.2027	15.966	14.6316	15.9335	14.8765	NA	NA	15.1789	14.4966	15.7794	15.332	NA	13.5611	14.6669	15.3289	15.6241	NA	NA	15.6133
Itgb4_A2A863_T1492_1	Itgb4	A2A863	T1492	1	NA	NA	NA	NA	NA	NA	NA	NA	NA	NA	14.2093	NA	NA	NA	NA	NA	NA	NA	15.6007	NA	NA	NA	NA	NA	NA	NA	NA	NA	NA	NA	NA	14.1151	14.1001	NA	NA	NA	NA	14.8056	NA	NA	NA	NA	13.4844	14.1508	NA
Itgb4_A2A863_S1071_1	Itgb4	A2A863	S1071	1	13.8495	13.656	14.1083	14.1071	13.4295	13.3507	13.4231	13.454	13.4479	13.424	NA	8.50937	8.04591	12.7733	13.7205	13.4869	NA	12.96	13.9044	14.0474	13.7234	13.3471	13.4109	13.8003	13.8866	13.7718	13.3793	13.4289	13.2348	13.9738	13.2079	13.6415	13.055	13.381	12.7804	13.4598	13.5556	13.5305	13.0351	12.8749	13.5714	13.326	13.1428	13.3945	13.691
Itgb4_A2A863_S1470_1	Itgb4	A2A863	S1470	1	14.1332	14.7476	14.9408	14.5125	13.8219	13.5134	NA	12.8787	15.2262	14.7732	13.7948	14.0692	14.5256	14.4263	15.0564	NA	NA	14.1996	15.3231	15.5004	14.4976	NA	15.2671	13.8023	15.5962	14.4031	NA	15.2657	14.6316	14.9148	14.8228	13.9475	14.7492	13.743	13.9278	14.0928	15.2288	14.4487	NA	13.73	13.0294	NA	10.5103	12.8503	13.8667
Itgb4_A2A863_T1467_1	Itgb4	A2A863	T1467	1	NA	NA	NA	NA	NA	NA	NA	NA	NA	NA	NA	NA	NA	NA	NA	NA	NA	NA	NA	NA	NA	NA	NA	14.1684	NA	NA	NA	NA	NA	NA	NA	NA	NA	NA	NA	NA	NA	NA	12.3212	NA	NA	NA	12.2323	NA	NA
Itgb4_A2A863_S1474_1	Itgb4	A2A863	S1474	1	-2.36164	10.3331	10.1459	10.579	NA	NA	NA	NA	10.7643	NA	NA	9.78034	NA	NA	NA	NA	NA	NA	NA	-1.78734	10.2526	11.7582	NA	NA	NA	-2.86049	-2.55255	NA	NA	NA	-2.1885	NA	NA	NA	NA	12.3526	NA	10.319	NA	NA	NA	NA	NA	NA	NA
Itgb4_A2A863_S1517_1	Itgb4	A2A863	S1517	1	NA	NA	NA	NA	NA	NA	NA	NA	NA	NA	NA	NA	NA	15.94	14.262	NA	NA	NA	NA	NA	NA	15.121	15.4467	NA	14.3994	NA	NA	14.6161	16.2952	14.7116	NA	NA	15.8965	13.7832	16.1261	16.4074	NA	NA	NA	NA	NA	12.2878	NA	NA	NA
Zfyve9_A2A8R0_S640_1	Zfyve9	A2A8R0	S640	1	14.3901	14.8753	14.7759	14.1708	14.8354	15.0648	NA	14.0669	13.5028	14.6432	15.0902	NA	13.5354	14.6023	14.2239	14.8022	14.5558	14.1013	NA	NA	NA	12.971	NA	13.6997	14.4042	14.176	13.8746	13.0241	NA	13.8997	NA	NA	NA	13.4745	NA	NA	13.6089	13.6475	NA	13.7054	14.3753	13.974	NA	NA	14.1274
Osbpl9_A2A8Z1_S329_1	Osbpl9	A2A8Z1	S329	1	NA	NA	NA	NA	16.0033	NA	NA	NA	NA	NA	13.7843	NA	NA	NA	NA	NA	NA	NA	NA	NA	NA	15.5563	16.1918	16.2622	NA	NA	16.2369	NA	NA	15.144	NA	15.9336	NA	13.9493	14.5634	NA	NA	14.7028	14.5174	NA	NA	NA	NA	NA	15.0932
Osbpl9_A2A8Z1_S325_2	Osbpl9	A2A8Z1	S325	2	NA	NA	NA	NA	NA	NA	NA	NA	NA	NA	NA	NA	NA	NA	NA	NA	NA	NA	NA	NA	NA	NA	NA	NA	NA	NA	NA	NA	NA	NA	NA	NA	NA	NA	NA	NA	NA	NA	NA	NA	NA	NA	NA	NA	NA
Osbpl9_A2A8Z1_S319_2	Osbpl9	A2A8Z1	S319	2	NA	NA	NA	NA	15.0015	NA	NA	NA	NA	NA	NA	NA	13.9665	NA	13.0262	13.9859	NA	NA	NA	NA	NA	NA	NA	NA	15.0525	NA	NA	14.3908	NA	NA	13.9626	13.3979	14.5368	12.5271	NA	15.6051	NA	NA	14.0147	NA	NA	NA	NA	NA	NA
Osbpl9_A2A8Z1_S329_2	Osbpl9	A2A8Z1	S329	2	NA	NA	NA	NA	NA	NA	NA	NA	NA	NA	NA	NA	NA	NA	13.0262	NA	NA	NA	NA	NA	NA	NA	NA	NA	NA	NA	NA	NA	NA	NA	NA	13.3979	NA	12.5271	NA	NA	NA	NA	NA	NA	NA	NA	NA	NA	NA
Osbpl9_A2A8Z1_T322_1	Osbpl9	A2A8Z1	T322	1	15.9852	15.9913	15.4754	15.8674	NA	15.5169	15.7026	16.1168	16.0901	15.4875	15.7037	15.4504	NA	15.743	15.5603	16.031	15.7856	NA	15.9996	15.3493	16.3395	16.1876	14.9112	NA	16.0498	15.8712	15.681	15.3801	15.9196	15.6872	NA	15.9262	NA	16.0594	15.4112	NA	15.6462	15.8226	NA	15.4675	15.1967	15.396	15.2168	15.6149	15.1511
Osbpl9_A2A8Z1_S324_1	Osbpl9	A2A8Z1	S324	1	NA	NA	NA	16.3611	NA	NA	NA	NA	NA	NA	NA	NA	15.698	NA	NA	15.5809	NA	16.1818	NA	NA	NA	NA	NA	NA	NA	NA	NA	NA	NA	14.8095	NA	14.9471	NA	NA	NA	NA	NA	NA	NA	NA	NA	15.1791	NA	NA	NA
Osbpl9_A2A8Z1_T322_2	Osbpl9	A2A8Z1	T322	2	NA	NA	NA	NA	15.0015	NA	NA	NA	NA	NA	15.284	NA	13.9665	NA	NA	13.9859	NA	NA	NA	NA	NA	NA	NA	NA	15.0525	NA	NA	14.3908	NA	NA	13.9626	15.6124	14.5368	NA	NA	NA	NA	NA	NA	NA	NA	NA	NA	NA	NA
Osbpl9_A2A8Z1_S317_2	Osbpl9	A2A8Z1	S317	2	NA	NA	NA	NA	NA	NA	NA	NA	NA	NA	15.284	NA	NA	NA	NA	NA	NA	NA	NA	NA	NA	NA	NA	NA	NA	NA	NA	NA	NA	NA	NA	15.6124	NA	NA	NA	15.6051	NA	NA	14.0147	NA	NA	NA	NA	NA	NA
Cnksr1_A2A9K7_S533_2	Cnksr1	A2A9K7	S533	2	NA	16.6257	NA	16.5896	16.0682	16.0943	16.3845	15.9685	16.6016	16.4919	16.4131	16.2452	NA	16.6396	16.4042	16.7	16.5199	NA	NA	16.25	16.8315	16.9283	16.4966	16.6114	15.1461	16.4246	16.6335	16.6488	NA	NA	16.9968	NA	16.485	17.1046	16.4802	16.2323	16.9313	16.843	NA	NA	16.1199	16.5639	NA	16.6522	16.1708
Cnksr1_A2A9K7_S522_2	Cnksr1	A2A9K7	S522	2	NA	NA	NA	NA	NA	NA	NA	NA	NA	NA	NA	NA	NA	NA	NA	NA	NA	NA	NA	NA	NA	NA	NA	NA	NA	NA	NA	NA	NA	NA	NA	NA	NA	NA	NA	NA	NA	NA	NA	NA	NA	NA	NA	NA	NA
Cnksr1_A2A9K7_T532_2	Cnksr1	A2A9K7	T532	2	NA	16.6257	NA	16.5896	16.0682	16.0943	16.3845	15.9685	16.6016	16.4919	16.4131	16.2452	NA	16.6396	16.4042	16.7	16.5199	NA	NA	16.25	16.8315	16.9283	16.4966	16.6114	15.1461	16.4246	16.6335	16.6488	NA	NA	16.9968	NA	16.485	17.1046	16.4802	16.2323	16.9313	16.843	NA	NA	16.1199	16.5639	NA	16.6522	16.1708
Cnksr1_A2A9K7_S548_1	Cnksr1	A2A9K7	S548	1	NA	NA	NA	NA	NA	NA	NA	NA	NA	NA	NA	NA	NA	15.9532	NA	NA	NA	NA	NA	16.0493	15.7985	NA	NA	15.3704	NA	NA	NA	NA	NA	NA	NA	NA	NA	NA	NA	NA	NA	NA	NA	15.823	15.3302	NA	NA	NA	NA
Cnksr1_A2A9K7_S552_1	Cnksr1	A2A9K7	S552	1	NA	NA	NA	NA	NA	NA	NA	NA	NA	NA	NA	NA	15.9299	NA	NA	NA	NA	NA	NA	NA	NA	NA	NA	NA	15.4366	NA	NA	NA	NA	NA	NA	NA	NA	NA	NA	15.7822	NA	NA	NA	NA	NA	NA	NA	NA	NA
Cnksr1_A2A9K7_S549_1	Cnksr1	A2A9K7	S549	1	15.9128	15.198	NA	NA	15.6094	15.6768	NA	NA	NA	NA	15.8469	15.8232	NA	NA	NA	15.6857	16.2572	16.2413	15.6129	NA	NA	NA	NA	NA	NA	16.0098	NA	NA	15.9926	15.7072	15.8196	15.9059	15.6473	16.0285	15.8196	NA	15.6872	15.7252	15.4125	NA	NA	NA	NA	15.292	NA
Cnksr1_A2A9K7_T544_1	Cnksr1	A2A9K7	T544	1	NA	15.9742	NA	NA	15.1795	NA	15.015	NA	14.8387	14.8597	15.4701	NA	NA	15.5722	15.5602	NA	15.4756	14.9385	NA	NA	NA	14.6763	15.8674	16.149	15.9895	16.3119	15.1371	15.6082	15.9131	16.0715	15.4263	16.4241	15.866	15.8091	15.3249	15.7543	15.8846	15.9884	15.5704	16.6708	NA	NA	15.9122	15.9603	NA
Cnksr1_A2A9K7_T280_1	Cnksr1	A2A9K7	T280	1	NA	13.5724	13.7028	NA	NA	NA	NA	NA	NA	NA	NA	NA	NA	NA	NA	NA	NA	NA	NA	NA	NA	NA	NA	NA	NA	NA	13.9529	NA	NA	NA	NA	NA	NA	13.657	NA	NA	NA	NA	NA	NA	NA	NA	NA	NA	NA
Cnksr1_A2A9K7_S302_1	Cnksr1	A2A9K7	S302	1	17.2145	16.9781	17.3962	17.0658	17.0163	17.1518	17.0288	16.9675	17.3667	17.5429	17.1156	17.3503	17.0144	17.2585	17.3937	17.0072	17.0371	17.2178	17.8709	17.919	17.7172	18.0145	17.9542	17.7436	17.4977	17.3378	17.5458	17.7605	17.7172	17.6972	18.057	17.4907	17.9952	17.8598	17.8868	17.7109	17.7573	17.7626	NA	NA	NA	NA	NA	NA	NA
Cnksr1_A2A9K7_S302_2	Cnksr1	A2A9K7	S302	2	NA	NA	15.0496	16.4734	NA	14.712	NA	15.4712	NA	NA	NA	NA	NA	NA	14.5665	14.403	14.7397	NA	NA	NA	NA	NA	NA	NA	NA	NA	14.7939	14.8827	NA	NA	NA	13.869	NA	NA	NA	NA	NA	15.3317	NA	NA	NA	NA	NA	NA	NA
Cnksr1_A2A9K7_S293_2	Cnksr1	A2A9K7	S293	2	NA	NA	NA	14.6502	NA	NA	NA	NA	NA	NA	NA	NA	NA	NA	14.5665	NA	14.7397	NA	NA	NA	NA	NA	NA	NA	NA	NA	14.7939	14.8827	NA	NA	NA	13.869	NA	NA	NA	NA	NA	NA	NA	NA	NA	NA	NA	NA	NA
Cnksr1_A2A9K7_S282_2	Cnksr1	A2A9K7	S282	2	NA	NA	NA	15.9943	NA	NA	NA	NA	NA	NA	NA	NA	NA	NA	NA	NA	NA	NA	NA	NA	NA	NA	NA	NA	NA	NA	NA	NA	NA	NA	NA	NA	NA	NA	NA	NA	NA	NA	NA	NA	NA	NA	NA	NA	NA
Cnksr1_A2A9K7_S295_2	Cnksr1	A2A9K7	S295	2	NA	NA	15.0496	NA	NA	14.712	NA	15.4712	NA	NA	NA	NA	NA	NA	NA	14.403	NA	NA	NA	NA	NA	NA	NA	NA	NA	NA	NA	NA	NA	NA	NA	NA	NA	NA	NA	NA	NA	15.3317	NA	NA	NA	NA	NA	NA	NA
Cnksr1_A2A9K7_S684_1	Cnksr1	A2A9K7	S684	1	NA	NA	NA	NA	NA	NA	NA	NA	NA	NA	NA	NA	NA	NA	NA	NA	NA	NA	NA	11.7777	13.3851	13.6991	NA	13.4737	15.2973	13.2128	NA	12.9452	NA	13.0906	13.5715	NA	NA	13.1933	13.6062	14.6481	14.9226	13.5043	NA	NA	NA	NA	NA	NA	NA
Cnksr1_A2A9K7_S672_1	Cnksr1	A2A9K7	S672	1	20.7718	20.671	20.6802	20.3851	20.9111	20.9971	20.7471	20.7405	20.6903	20.8684	20.8509	20.7928	20.468	20.8456	20.9013	20.8257	20.7818	21.1071	NA	NA	NA	NA	NA	NA	NA	NA	NA	NA	NA	NA	NA	NA	NA	NA	NA	NA	12.962	NA	21.1702	21.123	20.96	20.7823	21.2984	21.1404	20.9032
Cnksr1_A2A9K7_Y504_1	Cnksr1	A2A9K7	Y504	1	14.9236	14.215	15.2324	15.2135	16.0819	15.6884	15.278	15.3565	15.4308	15.6654	15.5378	15.163	15.3647	16.2185	16.0522	15.5506	15.5762	15.9503	NA	NA	NA	NA	13.6965	13.0663	NA	NA	12.2651	NA	13.1713	12.3975	NA	NA	NA	NA	14.5532	14.883	11.8981	NA	NA	NA	NA	NA	NA	NA	NA
Cnksr1_A2A9K7_T507_2	Cnksr1	A2A9K7	T507	2	16.666	NA	16.8694	NA	17.4278	17.6747	NA	NA	NA	NA	NA	NA	16.7124	NA	NA	17.327	NA	17.133	NA	NA	NA	NA	NA	NA	NA	NA	NA	NA	NA	13.7372	NA	NA	NA	NA	NA	NA	NA	NA	NA	NA	NA	12.6438	NA	NA	NA
Cnksr1_A2A9K7_Y504_2	Cnksr1	A2A9K7	Y504	2	17.8414	NA	17.3738	15.316	17.4278	17.6747	NA	14.8631	15.3974	15.6963	15.4587	NA	17.1759	14.8608	15.3085	15.2625	15.1173	17.133	NA	NA	NA	NA	NA	NA	NA	NA	NA	NA	NA	13.7372	NA	NA	NA	NA	NA	NA	NA	NA	NA	NA	NA	12.6438	NA	NA	NA
Cnksr1_A2A9K7_S518_2	Cnksr1	A2A9K7	S518	2	16.9979	NA	15.6129	15.316	NA	NA	NA	14.8631	15.3974	15.6963	15.4587	NA	15.3123	14.8608	15.3085	15.2625	15.1173	NA	NA	NA	NA	NA	NA	NA	NA	NA	NA	NA	NA	NA	NA	NA	NA	NA	NA	NA	NA	NA	NA	NA	NA	NA	NA	NA	NA
Cnksr1_A2A9K7_S505_2	Cnksr1	A2A9K7	S505	2	NA	NA	NA	NA	NA	NA	NA	NA	NA	NA	NA	NA	NA	NA	NA	17.327	NA	NA	NA	NA	NA	NA	NA	NA	NA	NA	NA	NA	NA	NA	NA	NA	NA	NA	NA	NA	NA	NA	NA	NA	NA	NA	NA	NA	NA
Cnksr1_A2A9K7_S518_3	Cnksr1	A2A9K7	S518	3	NA	12.0945	NA	13.423	NA	12.5993	NA	NA	NA	NA	10.1076	NA	13.7496	NA	NA	NA	NA	12.2121	NA	NA	NA	NA	NA	NA	NA	NA	NA	NA	NA	NA	NA	NA	NA	NA	NA	NA	NA	NA	NA	NA	NA	NA	NA	NA	NA
Cnksr1_A2A9K7_T507_3	Cnksr1	A2A9K7	T507	3	NA	12.0945	NA	13.423	NA	12.5993	NA	NA	NA	NA	10.1076	NA	13.7496	NA	NA	NA	NA	12.2121	NA	NA	NA	NA	NA	NA	NA	NA	NA	NA	NA	NA	NA	NA	NA	NA	NA	NA	NA	NA	NA	NA	NA	NA	NA	NA	NA
Cnksr1_A2A9K7_Y504_3	Cnksr1	A2A9K7	Y504	3	NA	12.0945	NA	13.423	NA	12.5993	NA	NA	NA	NA	10.1076	NA	13.7496	NA	NA	NA	NA	12.2121	NA	NA	NA	NA	NA	NA	NA	NA	NA	NA	NA	NA	NA	NA	NA	NA	NA	NA	NA	NA	NA	NA	NA	NA	NA	NA	NA
Tbkbp1_A2A9T0_S393_2	Tbkbp1	A2A9T0	S393	2	NA	14.5312	16.1564	14.5865	13.9864	16.4164	14.2467	15.0952	14.6256	13.2164	11.9981	14.7819	14.6791	15.5949	14.0496	NA	15.2939	16.5289	16.7265	14.3794	14.6038	14.4088	14.1718	13.9303	NA	NA	14.7488	13.3987	12.5547	13.4124	14.8747	14.1798	13.6638	14.0112	14.7043	13.1722	14.3025	15.2908	NA	NA	13.4194	12.9476	NA	14.1375	13.6514
Tbkbp1_A2A9T0_S385_2	Tbkbp1	A2A9T0	S385	2	NA	14.5312	14.2905	14.179	13.9864	14.1921	13.7483	13.8397	14.6256	NA	11.9981	13.3459	14.3826	14.9432	NA	NA	14.9789	13.8808	13.8547	13.8213	14.6038	14.4088	13.0179	12.2459	NA	NA	14.1461	NA	12.5547	NA	14.8747	13.6497	11.1044	13.4538	14.7043	13.1722	14.3025	15.2908	NA	NA	NA	10.166	NA	14.1375	13.6514
Tbkbp1_A2A9T0_S393_3	Tbkbp1	A2A9T0	S393	3	14.8582	15.1358	15.0716	15.4671	15.228	15.0704	15.2598	15.0719	NA	15.5358	NA	16.2133	15.5912	NA	15.1451	15.2296	14.4766	15.5043	15.8243	15.8862	15.5233	15.4404	15.4151	15.6248	15.6919	15.7729	15.7769	15.5112	15.5778	15.8364	15.6935	15.5997	15.5011	11.8051	15.5969	15.5139	15.1107	15.1847	15.6815	16.2761	16.0002	16.0658	15.8955	15.9782	15.9471
Tbkbp1_A2A9T0_S390_3	Tbkbp1	A2A9T0	S390	3	14.2563	14.5582	14.4593	15.076	14.755	14.5475	14.8351	14.7272	NA	15.5358	NA	16.2133	15.3073	NA	14.9582	14.8647	14.4766	15.2931	15.4864	15.6722	15.2628	15.0174	15.4151	15.3526	15.3425	15.603	15.4128	15.1906	15.4507	15.6099	15.5257	15.5997	15.3095	NA	15.3449	15.3597	14.8387	15.1847	15.2374	15.9667	15.7197	15.7971	15.8955	15.6733	15.6795
Tbkbp1_A2A9T0_S388_3	Tbkbp1	A2A9T0	S388	3	14.8582	15.1358	15.0716	15.4671	15.228	15.0704	15.2598	15.0719	NA	15.5358	NA	16.2133	15.5912	NA	15.1451	15.2296	14.4766	15.5043	15.8243	15.8862	15.5233	15.4404	15.4151	15.6248	15.6919	15.7729	15.7769	15.5112	15.5778	15.8364	15.6935	15.5997	15.5011	11.8051	15.5969	15.5139	15.1107	15.1847	15.6815	16.2761	16.0002	16.0658	15.8955	15.9782	15.9471
Tbkbp1_A2A9T0_S388_2	Tbkbp1	A2A9T0	S388	2	NA	NA	15.6937	12.5636	NA	16.069	12.4714	14.3121	NA	13.2164	NA	14.1164	12.251	14.1348	14.0496	NA	12.9439	16.2781	16.5146	12.7394	NA	NA	13.3108	13.3926	NA	NA	13.1986	13.3987	NA	13.4124	NA	12.4785	13.3956	12.3695	NA	NA	NA	NA	NA	NA	13.4194	12.7209	NA	NA	NA
Tbkbp1_A2A9T0_S385_3	Tbkbp1	A2A9T0	S385	3	13.3064	13.5359	13.5398	13.3931	13.3892	13.3528	13.2883	12.8375	NA	NA	NA	NA	13.1061	NA	12.1046	13.0679	NA	12.6275	13.5642	13.0273	12.9257	13.4643	NA	13.0846	13.4748	12.6023	13.6127	13.1838	12.0098	13.0536	12.5065	NA	12.4939	11.8051	12.9554	12.211	12.5697	NA	13.7654	13.9031	13.4996	13.509	NA	13.5863	13.3846
Tbkbp1_A2A9T0_S393_1	Tbkbp1	A2A9T0	S393	1	12.5266	NA	NA	NA	NA	12.6005	NA	NA	13.0832	13.222	NA	NA	NA	12.9184	12.1655	12.8115	NA	NA	13.4252	12.7461	NA	NA	NA	NA	NA	NA	NA	13.0159	13.1378	NA	NA	NA	NA	NA	NA	NA	NA	NA	NA	NA	NA	NA	NA	NA	NA
Tbkbp1_A2A9T0_S390_1	Tbkbp1	A2A9T0	S390	1	12.2824	11.5077	NA	NA	NA	NA	NA	NA	NA	NA	NA	NA	NA	NA	NA	NA	NA	NA	NA	NA	NA	NA	NA	NA	NA	NA	NA	NA	NA	NA	NA	NA	13.3717	NA	NA	NA	NA	NA	12.4106	NA	NA	NA	NA	NA	NA
Kiaa1109_A2AAE1_S3837_1	Kiaa1109	A2AAE1	S3837	1	NA	NA	16.9984	17.5255	15.8379	16.195	17.7893	17.4867	16.7481	16.4269	16.4894	16.5066	16.2836	16.4718	16.2997	16.5202	16.5438	NA	NA	16.2073	17.1509	17.7281	16.5577	16.6588	NA	16.8795	17.9467	17.5285	16.694	16.8667	16.371	NA	15.9277	16.28	16.4506	16.6693	15.9873	16.5627	NA	15.9873	16.4783	17.4834	16.0777	16.744	17.1672
Kiaa1109_A2AAE1_S3835_1	Kiaa1109	A2AAE1	S3835	1	15.9522	16.3259	NA	NA	NA	NA	15.9965	NA	NA	NA	16.7471	NA	16.9423	NA	NA	NA	NA	15.9221	NA	16.1222	NA	NA	NA	NA	16.2342	NA	NA	NA	NA	NA	NA	17.26	16.6574	NA	NA	17.2068	16.3837	NA	15.9089	NA	NA	NA	NA	15.745	NA
Kiaa1109_A2AAE1_S4613_1	Kiaa1109	A2AAE1	S4613	1	14.6302	14.9887	14.6559	14.5223	15.1214	14.3719	14.655	14.5275	14.9874	14.8562	15.0315	14.5309	14.6697	14.7361	14.8958	14.5819	14.5937	15.3118	15.1631	14.0516	14.7111	14.805	15.0493	14.7468	13.5683	14.1803	14.7049	14.9308	14.9446	14.4938	14.2304	14.584	14.6842	14.8554	14.4036	14.6286	14.4707	14.2957	15.2156	14.4112	14.6997	14.6212	15.0187	14.7221	14.9216
Kiaa1109_A2AAE1_S1355_1	Kiaa1109	A2AAE1	S1355	1	15.5692	16.0348	15.9301	15.8802	15.7535	15.7598	15.8854	15.8312	16.0066	16.0911	16.3935	16.1916	16.0264	16.0401	16.1561	15.9698	16.1559	15.915	15.825	16.1776	16.2036	16.004	15.8345	16.1576	16.0446	16.1765	15.8497	16.2751	16.1217	16.4681	16.1452	15.8098	15.9046	16.3739	16.0674	15.992	15.8275	16.2431	15.6006	15.8444	15.8817	15.6904	15.9825	15.9193	15.8503
Kiaa1109_A2AAE1_S1312_1	Kiaa1109	A2AAE1	S1312	1	14.3013	14.4981	14.1819	14.3085	13.9329	14.2533	14.2051	14.2527	14.0607	13.9117	14.1927	14.0518	13.7245	13.9409	13.9424	13.8141	14.195	13.9112	13.9938	14.0544	13.8376	13.9118	13.6821	13.8852	14.0231	14.3259	13.6393	14.0223	14.1452	14.4533	14.1021	13.7623	13.4974	13.6479	14.208	13.9229	12.9995	14.3596	14.1374	14.2539	13.8629	13.9386	14.1259	13.8872	14.3377
Kiaa1109_A2AAE1_S2755_1	Kiaa1109	A2AAE1	S2755	1	NA	NA	15.3559	15.2081	15.414	15.259	15.4568	15.513	15.122	15.4679	15.4928	NA	NA	14.846	13.6577	15.0544	14.8304	15.4616	15.3502	14.8481	15.3783	15.3779	15.4238	NA	NA	NA	NA	15.6031	15.241	15.088	14.8097	15.1609	15.3016	15.3761	15.3091	14.5878	15.2684	15.322	15.6854	15.6694	15.8375	NA	15.796	NA	15.7591
Kiaa1109_A2AAE1_T2757_1	Kiaa1109	A2AAE1	T2757	1	15.0889	15.6447	NA	15.6909	NA	NA	15.626	NA	NA	15.3088	12.9292	14.4749	15.3457	14.8841	13.6639	14.3724	14.8966	15.4308	15.2722	15.0202	15.2883	NA	NA	14.6652	15.5265	15.2505	15.6778	NA	14.5352	14.9266	13.2205	14.9738	13.9676	NA	14.1405	NA	14.7919	13.9116	NA	NA	NA	15.9124	NA	16.0713	NA
Kiaa1109_A2AAE1_S1323_1	Kiaa1109	A2AAE1	S1323	1	NA	11.6109	NA	13.5252	NA	12.7767	13.0254	13.3483	13.5247	13.1971	13.139	14.1624	13.5449	13.2623	NA	13.527	13.5453	12.5298	12.5779	12.9098	NA	12.8674	13.3597	13.4066	12.1519	12.4112	12.7219	13.7734	13.4242	14.2614	13.8531	13.9613	14.4541	12.7627	13.7589	14.0157	14.0374	14.0483	13.2547	11.6793	13.0523	13.3471	13.0755	13.1108	13.6255
Kiaa1109_A2AAE1_T1325_1	Kiaa1109	A2AAE1	T1325	1	NA	NA	NA	NA	NA	NA	NA	NA	NA	NA	NA	NA	NA	NA	NA	NA	NA	NA	NA	NA	NA	NA	NA	NA	NA	NA	NA	NA	NA	NA	NA	NA	NA	NA	NA	NA	NA	NA	NA	NA	NA	NA	NA	NA	NA
Kiaa1109_A2AAE1_S2295_2	Kiaa1109	A2AAE1	S2295	2	NA	NA	NA	NA	NA	NA	NA	NA	9.5898	NA	NA	NA	NA	NA	NA	NA	NA	NA	NA	NA	NA	NA	NA	NA	8.46397	NA	NA	NA	NA	NA	NA	NA	NA	NA	NA	NA	NA	NA	NA	NA	NA	NA	NA	NA	NA
Kiaa1109_A2AAE1_S2292_2	Kiaa1109	A2AAE1	S2292	2	NA	NA	NA	NA	NA	NA	NA	NA	9.5898	NA	NA	NA	NA	NA	NA	NA	NA	NA	NA	NA	NA	NA	NA	NA	8.46397	NA	NA	NA	NA	NA	NA	NA	NA	NA	NA	NA	NA	NA	NA	NA	NA	NA	NA	NA	12.3398
Kiaa1109_A2AAE1_S2300_2	Kiaa1109	A2AAE1	S2300	2	NA	NA	NA	NA	NA	NA	NA	NA	NA	NA	NA	NA	NA	NA	NA	NA	NA	NA	NA	NA	NA	NA	NA	NA	NA	NA	NA	NA	NA	NA	NA	NA	NA	NA	NA	NA	NA	NA	NA	NA	NA	NA	NA	NA	12.3398
Obscn_A2AAJ9_T6201_1	Obscn	A2AAJ9	T6201	1	20.0656	20.2616	19.6042	19.6086	20.0706	NA	19.9423	20.0624	19.6467	19.91	19.5683	NA	19.6119	19.5387	19.5801	19.5257	19.987	19.8217	19.9549	19.5429	19.63	19.3958	19.496	19.8029	NA	19.6506	19.6299	19.7663	19.4417	NA	19.3786	NA	19.9695	NA	19.5322	19.6196	20.0477	19.3423	19.4852	19.6763	19.8723	19.6536	20.1121	19.9218	19.5871
Obscn_A2AAJ9_S6203_1	Obscn	A2AAJ9	S6203	1	NA	NA	NA	NA	NA	20.0132	NA	NA	NA	NA	NA	19.5891	NA	NA	NA	NA	NA	NA	NA	NA	NA	NA	NA	NA	19.7483	NA	NA	NA	NA	19.8791	NA	19.795	NA	20.2582	NA	NA	NA	NA	NA	NA	NA	NA	NA	NA	NA
Obscn_A2AAJ9_S6203_2	Obscn	A2AAJ9	S6203	2	16.6216	17.6406	16.825	16.7448	17.0051	17.3415	16.9453	17.3195	17.2817	14.8324	14.9275	15.4077	15.9448	15.0664	16.0032	15.8213	16.1002	16.769	16.1447	16.5061	16.2857	15.9833	15.4763	16.1055	15.9368	16.4116	16.214	16.4752	16.1905	16.7259	15.9704	15.8275	15.7733	17.0213	15.9968	13.1925	15.0038	15.9631	18.4095	17.0149	17.5808	17.4377	18.1906	17.2843	16.9106
Obscn_A2AAJ9_T6201_2	Obscn	A2AAJ9	T6201	2	16.6216	17.6406	16.825	16.7448	17.0051	17.3415	16.9453	17.3195	17.2817	14.8324	14.9275	15.4077	15.9448	15.0664	16.0032	15.8213	16.1002	16.769	16.1447	16.5061	16.2857	15.9833	15.4763	16.1055	15.9368	16.4116	16.214	16.4752	16.1905	16.7259	15.9704	15.8275	15.7733	17.0213	15.9968	13.1925	15.0038	15.9631	18.4095	17.0149	17.5808	17.4377	18.1906	17.2843	16.9106
Obscn_A2AAJ9_S5938_1	Obscn	A2AAJ9	S5938	1	NA	NA	NA	NA	NA	NA	NA	NA	NA	NA	NA	NA	NA	NA	NA	NA	NA	NA	NA	NA	NA	NA	NA	16.5195	NA	NA	NA	NA	17.9682	NA	NA	NA	NA	NA	NA	NA	NA	NA	NA	NA	NA	NA	NA	NA	NA
Obscn_A2AAJ9_T5940_1	Obscn	A2AAJ9	T5940	1	NA	NA	NA	NA	NA	NA	NA	NA	NA	NA	NA	NA	NA	NA	NA	NA	NA	NA	NA	NA	NA	NA	NA	NA	NA	NA	NA	NA	NA	17.9617	NA	NA	NA	NA	NA	NA	NA	NA	NA	NA	NA	NA	NA	18.1014	NA
Obscn_A2AAJ9_S5942_1	Obscn	A2AAJ9	S5942	1	18.1983	18.3795	17.8405	17.6544	18.1815	18.212	17.9118	17.9566	17.7944	18.1709	17.9419	17.9834	18.0809	17.7194	17.9415	17.7502	18.0369	17.7651	17.8478	17.7401	17.6356	17.5021	17.1799	17.5359	17.7049	17.6645	17.4846	17.8665	NA	NA	17.6585	18.3515	18.4246	18.0375	17.8923	18.0627	18.4414	17.5566	18.069	18.0633	18.2822	17.7738	18.4254	NA	17.9615
Obscn_A2AAJ9_S5948_1	Obscn	A2AAJ9	S5948	1	NA	NA	NA	NA	NA	NA	NA	NA	NA	NA	NA	NA	NA	NA	16.4846	NA	NA	NA	NA	NA	NA	NA	NA	NA	NA	NA	NA	NA	NA	NA	NA	NA	NA	NA	NA	NA	NA	NA	NA	NA	NA	NA	NA	NA	NA
Obscn_A2AAJ9_S2943_1	Obscn	A2AAJ9	S2943	1	NA	19.3036	NA	NA	NA	NA	NA	NA	19.136	19.1066	19.1882	NA	19.051	18.9784	19.0451	19.3428	19.2075	NA	NA	NA	19.3694	NA	NA	NA	NA	19.1065	NA	NA	20.1601	19.9787	NA	19.3275	19.021	19.5421	19.1489	18.7008	18.5946	19.2557	NA	18.9372	NA	NA	NA	NA	18.9737
Obscn_A2AAJ9_S2941_1	Obscn	A2AAJ9	S2941	1	19.2825	NA	19.0247	19.3124	19.0102	19.3131	19.5807	19.4728	NA	NA	NA	19.2789	NA	NA	NA	NA	NA	19.3008	19.1848	19.1826	NA	19.8419	19.0158	19.2306	18.4896	NA	19.1954	19.8559	NA	NA	19.4314	NA	NA	NA	NA	NA	NA	NA	19.5809	NA	19.0496	18.7863	19.4156	19.9279	NA
Obscn_A2AAJ9_S7889_1	Obscn	A2AAJ9	S7889	1	20.6116	20.729	20.1293	20.1546	20.3585	20.535	20.3199	20.6104	20.3939	20.3249	20.7091	20.6452	20.5104	20.216	20.1888	20.5109	20.6058	21.0981	20.0325	19.6594	20.3123	19.9605	20.4049	20.5764	20.1197	20.5723	19.9952	20.1298	20.3824	20.4525	19.9267	20.6391	20.7958	20.6434	20.1995	20.4212	20.9151	19.8588	19.4889	19.8431	19.7913	19.6415	19.9231	20.0166	20.0242
Obscn_A2AAJ9_S8373_1	Obscn	A2AAJ9	S8373	1	19.2679	18.9427	18.903	19.1203	18.2645	18.7038	18.3658	19.1798	19.5281	18.983	19.3467	19.0691	19.3394	18.7658	19.0726	19.2669	19.2299	19.3718	19.4845	18.7032	19.0961	19.3988	19.3477	19.7816	19.731	18.8517	19.2361	19.8098	19.0547	19.1358	19.4776	19.3335	19.7235	19.7123	19.626	19.3576	19.3576	19.063	18.4139	18.2314	18.4329	18.2597	18.6004	17.3027	17.8496
Obscn_A2AAJ9_S4960_1	Obscn	A2AAJ9	S4960	1	17.396	18.1365	18.534	19.6398	17.657	18.5217	19.6999	19.5429	17.7695	18.3711	18.2373	18.3867	18.8547	18.2788	18.0863	18.2671	18.3728	18.6344	17.9992	17.7057	18.2244	18.2832	18.3436	18.7155	17.6483	18.1854	17.8771	18.7463	18.8824	19.0548	18.2446	18.7887	19.0058	18.4114	18.2034	18.391	19.1459	18.6838	18.5876	18.7959	18.0226	17.8353	19.1832	17.9878	18.48
Obscn_A2AAJ9_S4078_1	Obscn	A2AAJ9	S4078	1	16.9567	17.0552	16.6437	17.677	16.9244	17.1859	17.7377	17.4903	16.4849	16.6273	16.7656	16.8944	16.9478	16.7809	16.5987	16.829	16.8932	17.1884	17.2387	17.5725	17.4003	17.3875	17.1754	17.3008	17.2176	17.6303	17.4609	17.7352	16.8609	18.0793	17.1304	17.6074	17.2961	17.5066	17.1367	16.9981	17.3095	17.5318	16.204	16.401	16.0866	16.1455	16.4715	16.1359	16.3842
Obscn_A2AAJ9_S4166_1	Obscn	A2AAJ9	S4166	1	16.9567	17.0552	16.6437	17.677	16.9244	17.1859	17.7377	17.4903	16.4849	16.6273	16.7656	16.8944	16.9478	16.7809	16.5987	16.829	16.8932	17.1884	17.2387	17.5725	17.4003	17.3875	17.1754	17.3008	17.2176	17.6303	17.4609	17.7352	16.8609	18.0793	17.1304	17.6074	17.2961	17.5066	17.1367	16.9981	17.3095	17.5318	16.204	16.401	16.0866	16.1455	16.4715	16.1359	16.3842
Obscn_A2AAJ9_S4342_1	Obscn	A2AAJ9	S4342	1	16.9567	17.0552	16.6437	17.677	16.9244	17.1859	17.7377	17.4903	16.4849	16.6273	16.7656	16.8944	16.9478	16.7809	16.5987	16.829	16.8932	17.1884	17.2387	17.5725	17.4003	17.3875	17.1754	17.3008	17.2176	17.6303	17.4609	17.7352	16.8609	18.0793	17.1304	17.6074	17.2961	17.5066	17.1367	16.9981	17.3095	17.5318	16.204	16.401	16.0866	16.1455	16.4715	16.1359	16.3842
Obscn_A2AAJ9_S4518_1	Obscn	A2AAJ9	S4518	1	16.9567	17.0552	16.6437	17.677	16.9244	17.1859	17.7377	17.4903	16.4849	16.6273	16.7656	16.8944	16.9478	16.7809	16.5987	16.829	16.8932	17.1884	17.2387	17.5725	17.4003	17.3875	17.1754	17.3008	17.2176	17.6303	17.4609	17.7352	16.8609	18.0793	17.1304	17.6074	17.2961	17.5066	17.1367	16.9981	17.3095	17.5318	16.204	16.401	16.0866	16.1455	16.4715	16.1359	16.3842
Obscn_A2AAJ9_S4782_1	Obscn	A2AAJ9	S4782	1	16.9567	17.0552	16.6437	17.677	16.9244	17.1859	17.7377	17.4903	16.4849	16.6273	16.7656	16.8944	16.9478	16.7809	16.5987	16.829	16.8932	17.1884	17.2387	17.5725	17.4003	17.3875	17.1754	17.3008	17.2176	17.6303	17.4609	17.7352	16.8609	18.0793	17.1304	17.6074	17.2961	17.5066	17.1367	16.9981	17.3095	17.5318	16.204	16.401	16.0866	16.1455	16.4715	16.1359	16.3842
Obscn_A2AAJ9_T5762_1	Obscn	A2AAJ9	T5762	1	18.0723	18.4366	17.5576	18.4402	18.251	18.0904	17.9443	18.4506	17.7897	18.1009	17.6183	18.0816	18.0486	17.7309	17.613	17.9882	18.4915	18.2377	18.1043	17.91	18.1344	17.9646	17.7942	18.2808	17.973	18.1001	18.0741	18.294	17.9595	18.5429	17.9067	18.3214	18.4865	18.9711	18.0288	18.2022	18.4956	18.129	16.9073	17.7092	17.4164	17.536	17.5965	18.0631	17.5367
Obscn_A2AAJ9_S5778_1	Obscn	A2AAJ9	S5778	1	16.7147	16.8897	16.7674	16.7997	16.3771	16.6275	16.8009	16.8184	16.9946	16.7689	16.679	16.7649	16.8762	16.7298	16.5615	16.5225	16.748	16.7804	16.8882	17.0192	16.7947	NA	16.9225	16.7258	16.4914	16.5576	16.4902	16.6126	16.712	16.4814	17.0558	16.9407	17.1936	17.011	16.5605	16.5619	16.8834	16.7932	16.3116	15.9928	16.6326	15.8962	16.283	16.1612	16.276
Obscn_A2AAJ9_T6889_1	Obscn	A2AAJ9	T6889	1	14.5544	NA	NA	NA	14.493	NA	NA	15.2335	14.8149	15.0575	NA	NA	15.2319	NA	NA	NA	13.9876	NA	NA	NA	NA	NA	NA	NA	NA	NA	14.8239	NA	NA	NA	NA	NA	NA	NA	NA	15.1504	NA	NA	NA	NA	NA	NA	NA	NA	NA
Obscn_A2AAJ9_S6887_1	Obscn	A2AAJ9	S6887	1	NA	14.5627	14.4036	14.8308	NA	14.3348	14.908	NA	NA	NA	14.2081	15.1065	15.2319	14.6572	14.7964	14.5556	NA	14.6678	14.9041	14.7535	15.5666	15.4531	14.9673	14.9174	14.8577	14.9345	NA	15.1565	15.3056	15.4915	15.6444	15.677	15.5641	13.1226	15.2489	NA	15.2636	15.485	15.0558	15.4025	14.9867	14.3717	15.2383	14.7595	14.863
Obscn_A2AAJ9_S8377_2	Obscn	A2AAJ9	S8377	2	14.5126	13.4373	13.6042	13.6909	13.4815	13.5556	12.8658	13.7749	13.9583	13.5821	13.8826	12.4403	13.0726	13.2778	13.4816	13.7002	12.8997	13.8202	14.0721	12.7028	13.4776	12.9499	13.6352	14.5482	14.1982	13.0838	13.6987	13.8917	13.2797	12.5531	12.2739	12.6126	14.0898	13.9529	13.1359	13.0881	13.9429	11.8467	13.5157	13.2328	13.0827	13.9095	13.5859	12.0172	12.4516
Obscn_A2AAJ9_S8373_2	Obscn	A2AAJ9	S8373	2	14.5126	13.4373	13.6042	13.6909	13.4815	13.5556	12.8658	13.7749	13.9583	13.5821	13.8826	12.4403	13.0726	13.2778	13.4816	13.7002	12.8997	13.8202	14.0721	12.7028	13.4776	12.9499	13.6352	14.5482	14.1982	13.0838	13.6987	13.8917	13.2797	12.5531	12.2739	12.6126	14.0898	13.9529	13.1359	13.0881	13.9429	11.8467	13.5157	13.2328	13.0827	13.9095	13.5859	12.0172	12.4516
Obscn_A2AAJ9_S7765_3	Obscn	A2AAJ9	S7765	3	25.1106	25.2658	24.9367	25.1696	24.8791	25.0549	25.1121	24.9869	25.1378	25.1028	24.8792	24.9742	24.9156	24.7134	24.7878	24.7448	24.8461	25.1437	25.1987	25.1185	24.9824	24.9147	25.0044	25.2854	24.9314	24.8486	24.977	24.9354	25.0973	24.9559	24.9768	25.1297	25.0657	25.1711	24.8762	24.8564	24.7315	24.9394	25.2825	25.1016	25.7974	25.6954	25.6855	25.5811	25.4426
Obscn_A2AAJ9_S7760_3	Obscn	A2AAJ9	S7760	3	25.1218	25.2693	24.9354	25.1696	24.8832	25.1313	25.1427	24.9869	25.2331	25.2048	24.8797	25.1216	24.9119	24.7273	24.8338	24.7573	24.8463	25.1449	25.1989	25.1178	24.9832	24.9139	24.9957	25.2854	25.0645	25.0079	24.9977	24.9348	25.0936	24.9563	24.977	25.1291	25.064	25.1387	24.9138	24.8578	24.734	24.9384	25.2807	25.2986	25.7964	25.6962	25.6855	25.584	25.3948
Obscn_A2AAJ9_S7756_3	Obscn	A2AAJ9	S7756	3	25.1194	25.2714	24.9399	25.1696	24.882	25.1313	25.1421	24.987	25.2344	25.2019	24.8805	25.1216	24.9156	24.7305	24.8338	24.7573	24.8494	25.1451	25.199	25.0744	24.9823	24.9159	25.005	25.2856	25.0641	25.007	24.9977	24.9352	25.0982	24.9561	24.9788	25.1297	25.0691	25.1712	24.9158	24.8603	24.7325	24.9402	25.2812	25.2986	25.8007	25.6959	25.6889	25.5848	25.4438
Obscn_A2AAJ9_T7763_3	Obscn	A2AAJ9	T7763	3	18.3877	17.713	18.2096	9.77459	16.7814	20.8542	19.6016	13.6524	21.3364	21.3744	16.4166	21.7572	16.2952	18.5709	19.8418	17.8967	17.1629	16.4016	14.5976	20.0849	15.2422	16.8772	17.8147	14.0859	21.573	21.7633	18.8657	15.1989	17.2783	13.5608	16.8945	13.673	17.7309	19.7013	19.819	17.4206	16.2123	15.8101	16.4469	22.3284	18.964	16.2199	17.9563	17.2796	20.6321
Obscn_A2AAJ9_S7760_2	Obscn	A2AAJ9	S7760	2	22.618	23.0652	23.2079	22.9402	23.1522	23.2695	23.2162	23.1064	22.8779	23.3842	23.5691	23.3823	23.4146	23.0611	23.2862	23.3964	23.4839	22.7041	22.4744	23.2569	22.5478	22.4654	23.4015	23.6936	22.8492	23.1991	23.1823	23.0554	23.5086	22.6291	22.9401	23.2492	23.6091	23.6034	23.4094	23.4706	23.4937	23.3124	23.1358	23.5473	23.4942	23.1819	24.0274	23.7392	23.4259
Obscn_A2AAJ9_S7756_2	Obscn	A2AAJ9	S7756	2	22.618	22.6465	22.6011	22.4009	22.3053	22.7201	22.4595	22.4521	22.8779	23.0356	23.2035	23.1033	23.0214	22.5254	22.8247	22.9542	22.9245	21.8208	21.4345	22.3632	22.0906	22.4654	22.8235	23.163	21.6609	21.9502	22.2759	22.3958	23.0777	22.6291	22.7964	23.2492	23.2132	22.994	22.7677	22.7778	23.0454	22.3611	22.4046	22.9327	23.059	23.1819	23.2939	23.1953	22.8064
Obscn_A2AAJ9_S7765_2	Obscn	A2AAJ9	S7765	2	21.5432	22.2755	22.5634	21.2594	22.0692	21.983	22.183	22.0336	21.1275	21.2748	22.6593	21.347	21.6342	21.5228	21.7865	21.8967	21.8466	22.2559	21.9468	22.3063	22.2065	21.894	22.204	22.0572	22.3801	23.1607	22.239	21.609	22.5846	21.6689	18.7515	19.7791	22.2486	22.3446	22.2566	22.0798	21.9927	22.2619	22.2172	22.043	21.9641	22.0892	22.5023	22.4803	21.9075
Obscn_A2AAJ9_T7763_2	Obscn	A2AAJ9	T7763	2	21.5432	21.4508	21.9489	NA	19.0323	19.8464	20.4811	19.9314	21.1275	17.5136	21.8721	19.5754	19.1634	18.1888	19.6399	19.9171	NA	20.8422	20.0011	20.7478	21.7423	21.894	20.1621	17.5225	20.2168	22.5143	20.9235	8.50503	21.6134	21.6689	18.2952	19.7791	20.8671	19.8346	20.72	NA	19.9577	NA	20.2082	20.2262	19.9518	22.0892	19.7362	20.4709	NA
Obscn_A2AAJ9_S7756_1	Obscn	A2AAJ9	S7756	1	19.9375	20.0143	19.4094	19.2408	19.4493	19.7018	19.5037	19.5726	19.3833	19.4107	19.5993	19.6169	19.3182	19.2569	19.232	19.3655	19.5432	19.7518	19.6816	19.2923	19.8323	19.3691	19.5763	19.9116	19.663	19.9202	19.1445	19.5167	19.315	19.3893	19.0734	19.9022	20.0052	19.8267	19.5116	19.9322	20.1362	18.9781	18.9533	19.3519	19.3795	19.2702	19.1353	19.4173	19.564
Obscn_A2AAJ9_S7765_1	Obscn	A2AAJ9	S7765	1	NA	NA	NA	NA	NA	NA	NA	NA	NA	NA	NA	NA	NA	NA	NA	NA	NA	NA	NA	NA	NA	NA	NA	NA	NA	NA	NA	NA	NA	NA	NA	NA	NA	NA	NA	NA	NA	NA	NA	NA	NA	NA	NA	NA	NA
Obscn_A2AAJ9_T5703_2	Obscn	A2AAJ9	T5703	2	23.6452	23.0988	22.4699	22.8105	22.9187	23.1869	23.2545	23.1707	22.7535	22.0939	22.7424	22.2982	22.6972	22.6185	22.718	22.6036	22.8824	22.7207	22.7478	22.2761	22.4046	22.6692	22.7032	23.3722	23.2527	23.0296	22.8726	23.0873	22.6344	22.6979	22.7596	22.7266	23.3118	23.4977	22.9793	22.509	23.071	22.412	23.5875	22.9873	23.8035	23.4384	23.7304	23.2961	23.2527
Obscn_A2AAJ9_S5699_2	Obscn	A2AAJ9	S5699	2	23.6213	23.0168	22.4277	22.6075	22.9012	23.1649	23.2381	23.0656	22.691	22.0017	22.7295	22.1814	22.6715	22.6054	22.6387	22.5651	22.8401	22.6805	22.718	22.2761	22.3493	22.6245	22.6746	23.3482	23.2365	22.8865	22.8168	23.0366	22.6201	22.6259	22.73	22.6672	23.2762	23.4278	22.93	22.4694	22.9813	22.3561	23.5596	22.8687	23.7257	23.4211	23.6585	23.2891	23.2382
Obscn_A2AAJ9_S5699_1	Obscn	A2AAJ9	S5699	1	23.1478	22.8952	22.6348	22.3724	23.5296	23.4512	23.2947	23.0749	22.5772	22.0516	22.5768	22.1043	22.9184	22.8738	22.3894	22.3943	22.6261	22.9713	22.9957	23.5092	23.1086	22.9883	22.94	23.1592	23.2029	23.2656	22.9387	22.6998	23.0457	22.9071	22.7616	23.2814	23.4177	22.7355	23.0645	22.8295	23.7306	22.421	22.8993	22.0094	23.3949	23.1133	22.4896	23.4803	23.1765
Obscn_A2AAJ9_T5703_1	Obscn	A2AAJ9	T5703	1	19.8541	20.8968	19.7992	20.8004	18.2008	18.8532	20.0168	18.5095	19.9443	20.6596	20.1687	20.9627	19.4599	19.5675	18.3931	19.0998	20.7402	19.575	19.5954	19.0415	20.1901	19.9097	19.7813	20.1113	19.0676	19.8505	20.2698	20.3554	19.258	20.0274	20.7021	20.7338	20.6648	20.8361	19.8442	20.7772	19.058	19.9841	18.5045	20.8112	18.8312	19.3568	21.3115	19.3074	18.9226
Obscn_A2AAJ9_S5708_2	Obscn	A2AAJ9	S5708	2	18.4613	NA	NA	NA	NA	NA	NA	NA	14.6339	NA	NA	NA	NA	16.6824	NA	10.8609	NA	NA	NA	NA	NA	NA	NA	NA	NA	NA	NA	NA	NA	15.4102	NA	NA	NA	NA	12.8293	NA	NA	NA	NA	NA	NA	NA	NA	NA	NA
Obscn_A2AAJ9_S5706_2	Obscn	A2AAJ9	S5706	2	19.1387	18.9216	17.3544	18.9958	16.5436	17.1378	16.7889	16.8716	18.0643	18.08	15.9281	18.6135	16.8745	17.319	16.5438	17.3405	17.7702	17.5361	17.1372	NA	17.6699	17.6348	17.0305	17.4494	16.7641	17.4886	18.1522	18.231	15.9694	18.3089	17.1367	16.898	17.9511	19.0959	18.0471	17.3012	19.0174	17.6962	17.8791	19.3235	16.2774	17.0474	19.3698	15.6086	16.6162
Obscn_A2AAJ9_S5706_1	Obscn	A2AAJ9	S5706	1	NA	NA	NA	NA	NA	NA	NA	NA	NA	17.3273	16.6315	16.6384	18.493	15.2854	18.5157	NA	16.9351	NA	NA	16.7633	NA	15.9277	16.1706	16.4493	NA	NA	NA	17.4312	16.804	16.5201	NA	18.6572	18.1828	17.5634	17.0262	18.9469	17.8277	16.4308	NA	NA	NA	14.7967	NA	NA	NA
Obscn_A2AAJ9_S5706_3	Obscn	A2AAJ9	S5706	3	18.4507	18.3384	17.7849	17.5508	17.9251	17.8843	17.4687	17.3338	17.0152	16.2811	16.5353	16.5302	17.4053	16.0659	16.07	16.3249	16.8485	17.9581	18.1992	17.3058	16.5794	16.8638	17.1913	17.4618	18.0796	17.783	17.7671	17.248	16.5107	18.3655	16.4564	16.9632	18.5862	18.7518	18.5665	17.4158	17.9797	16.738	19.1528	18.2642	18.4409	17.7552	18.7217	17.9784	17.7351
Obscn_A2AAJ9_T5703_3	Obscn	A2AAJ9	T5703	3	18.4507	18.3384	17.7849	17.5508	17.9251	17.8843	17.4687	17.3338	17.0152	16.2811	16.5353	16.5302	17.4053	16.0659	16.4657	16.5499	16.8485	17.9581	18.1992	17.3058	16.5794	16.8638	17.1913	17.4618	18.0796	17.783	17.7671	17.248	16.5107	18.3655	16.4564	16.9632	18.5862	18.7518	18.5665	17.4158	17.9797	16.738	19.1528	18.2642	18.4409	17.7552	18.7217	17.9784	17.7351
Obscn_A2AAJ9_S5699_3	Obscn	A2AAJ9	S5699	3	18.4507	18.3384	17.7849	17.5508	17.9251	17.8843	17.4687	17.3338	17.0152	16.2811	16.5353	16.5302	17.4053	16.0659	16.4657	16.5499	16.8485	17.9581	18.1992	17.3058	16.5794	16.8638	17.1913	17.4618	18.0796	17.783	17.7671	17.248	16.5107	18.3655	16.4564	16.9632	18.5862	18.7518	18.5665	17.4158	17.9797	16.738	19.1528	18.2642	18.4409	17.7552	18.7217	17.9784	17.7351
Obscn_A2AAJ9_S5708_3	Obscn	A2AAJ9	S5708	3	NA	NA	NA	NA	NA	NA	NA	NA	NA	NA	NA	NA	NA	NA	14.4061	NA	NA	NA	NA	NA	NA	NA	NA	NA	NA	NA	NA	NA	NA	NA	NA	NA	NA	NA	NA	NA	NA	NA	NA	NA	NA	NA	NA	NA	NA
Obscn_A2AAJ9_S5715_3	Obscn	A2AAJ9	S5715	3	NA	NA	NA	NA	NA	NA	NA	NA	NA	NA	NA	NA	NA	NA	NA	13.7582	NA	NA	NA	NA	NA	NA	NA	NA	NA	NA	NA	NA	NA	NA	NA	NA	NA	NA	NA	NA	NA	NA	NA	NA	NA	NA	NA	NA	NA
Obscn_A2AAJ9_S5754_1	Obscn	A2AAJ9	S5754	1	23.2394	23.3473	23.1961	23.0985	23.0711	23.4393	23.2917	23.1896	22.9923	23.2094	23.2756	23.3963	23.444	22.9835	23.1761	23.1118	23.4855	23.2095	23.2112	23.5064	23.3905	23.3051	23.0983	23.289	23.3672	23.5199	23.5959	23.307	23.1898	23.4754	23.2012	23.2595	23.2641	23.2812	23.3389	23.1032	23.2017	23.2825	22.7057	22.6873	22.7308	22.4978	23.1661	22.7793	22.7642
Obscn_A2AAJ9_T5752_1	Obscn	A2AAJ9	T5752	1	NA	NA	NA	NA	NA	NA	NA	NA	NA	NA	NA	NA	NA	NA	NA	NA	NA	NA	NA	NA	NA	NA	NA	NA	NA	NA	NA	NA	NA	NA	NA	NA	NA	NA	NA	NA	NA	NA	NA	NA	NA	NA	NA	NA	NA
Obscn_A2AAJ9_S5754_2	Obscn	A2AAJ9	S5754	2	20.2602	20.1565	20.3158	20.4476	20.5128	20.5829	20.0059	20.2163	20.3721	20.4365	20.7142	20.0699	20.1633	20.3412	19.9287	20.5502	20.3279	20.6009	20.1269	20.158	20.2327	20.2045	20.0108	20.316	20.1069	20.3107	20.8135	20.6588	20.2786	20.2476	19.9329	19.9936	19.8536	20.0745	19.9033	19.7093	19.6144	20.0343	20.3408	19.8296	20.5256	20.3166	20.7281	20.4676	20.4923
Obscn_A2AAJ9_S5753_2	Obscn	A2AAJ9	S5753	2	20.2602	20.1565	20.3158	20.8954	20.9208	20.5829	20.0059	20.8044	20.779	20.4365	21.111	20.6537	20.7615	20.3412	20.4087	20.5502	20.8778	20.6009	20.1269	20.158	20.09	20.4593	19.9966	20.6409	20.1069	20.5893	20.7224	20.9902	20.2786	20.6989	20.1685	20.4546	20.4019	20.4599	20.3274	20.1882	20.2166	20.4177	20.3408	19.6702	20.4224	20.3166	20.7281	20.4676	20.4923
Obscn_A2AAJ9_T5752_2	Obscn	A2AAJ9	T5752	2	NA	NA	NA	18.9893	18.8996	NA	NA	19.2258	18.7544	NA	19.055	19.0665	19.2029	NA	18.5875	NA	19.2201	NA	NA	NA	NA	18.4302	16.627	18.3311	NA	18.0798	NA	18.7054	NA	18.8024	18.1033	18.5842	18.7408	18.3668	18.3543	18.3644	18.6654	18.3182	NA	NA	NA	NA	NA	NA	NA
Obscn_A2AAJ9_S5750_2	Obscn	A2AAJ9	S5750	2	NA	NA	NA	NA	NA	NA	NA	NA	NA	NA	NA	NA	NA	NA	NA	NA	NA	NA	NA	NA	16.8235	16.8707	16.7675	NA	NA	NA	16.7827	NA	NA	NA	16.6669	NA	NA	NA	NA	NA	NA	NA	NA	16.5729	16.6696	NA	NA	NA	NA
Obscn_A2AAJ9_S5754_3	Obscn	A2AAJ9	S5754	3	17.0638	18.1713	17.1992	15.7543	17.299	17.2797	17.8136	17.7313	15.3537	17.0414	18.1804	17.9648	17.1588	18.6932	18.8488	17.2754	18.6934	17.4409	17.0382	16.9693	16.5448	16.9776	18.2098	13.6108	16.6368	18.9343	17.0242	18.8723	18.7397	17.1041	16.7236	17.197	17.1404	18.2942	16.7752	17.038	16.5561	17.8135	17.1631	16.7739	17.3866	16.8322	18.5651	18.3904	16.8708
Obscn_A2AAJ9_T5752_3	Obscn	A2AAJ9	T5752	3	14.3741	17.3474	15.2267	14.9531	17.299	15.2305	17.8136	17.3528	15.3537	NA	18.484	17.0869	15.8414	18.9605	19.0561	17.2754	17.9437	15.0633	17.1201	13.7834	16.5448	13.5744	18.2098	17.5416	16.428	14.5693	17.0242	17.2981	17.2319	17.1041	NA	14.2962	14.3628	17.6042	NA	13.931	15.0833	17.8135	NA	16.6465	16.9921	13.0769	17.9469	16.956	13.6711
Obscn_A2AAJ9_S5750_3	Obscn	A2AAJ9	S5750	3	16.8208	16.9708	16.7748	14.5236	NA	16.8807	16.816	15.6157	NA	17.0414	18.3469	16.8314	17.3011	18.9711	18.9397	NA	18.481	17.1325	12.9408	16.8014	NA	16.8343	17.4919	17.4438	17.5362	18.8625	NA	18.2819	18.1145	NA	16.7236	16.9896	16.913	18.2404	16.7752	16.8601	16.6897	17.7088	17.1631	17.432	17.0047	16.7212	17.9077	18.1434	16.8852
Obscn_A2AAJ9_S5753_3	Obscn	A2AAJ9	S5753	3	17.0638	18.1713	17.1992	15.7543	17.299	17.2797	16.8113	17.7313	15.3537	17.0414	18.9274	17.9648	17.4836	18.7179	18.8332	17.2754	17.8102	17.4409	17.1201	16.9693	16.5448	16.9776	16.8589	17.5416	17.5362	17.2677	17.0242	17.2981	17.2319	17.1041	16.7236	17.197	17.1404	17.0317	16.7752	17.038	16.8532	13.978	17.1631	17.5786	17.7247	16.8322	18.0801	16.956	16.9541
Obscn_A2AAJ9_T5744_3	Obscn	A2AAJ9	T5744	3	NA	NA	NA	NA	NA	NA	NA	NA	NA	NA	NA	NA	NA	NA	NA	NA	NA	NA	NA	NA	NA	NA	NA	NA	NA	18.3884	NA	18.2819	18.1145	NA	NA	NA	NA	NA	NA	NA	NA	NA	NA	NA	NA	NA	NA	17.9488	NA
Obscn_A2AAJ9_S6520_1	Obscn	A2AAJ9	S6520	1	18.4115	18.9513	18.3305	18.6791	18.9815	18.8599	18.8889	19.4988	18.821	19.0892	19.2925	18.9905	19.193	19.0775	18.9716	19.2789	19.4215	19.238	18.7628	18.7453	19.0976	18.783	18.959	19.0471	18.5971	19.3981	19.3011	19.3943	19.2148	19.9139	19.0916	19.5591	19.1077	19.6839	19.3431	19.7106	19.378	19.5598	17.4563	18.0473	17.9333	18.3021	17.6657	18.5745	18.3674
Obscn_A2AAJ9_S6520_2	Obscn	A2AAJ9	S6520	2	20.0005	18.457	21.0212	19.9232	19.4269	18.1344	18.7823	18.7694	17.201	NA	NA	NA	NA	17.1965	18.263	18.0425	19.1546	18.1749	20.4109	17.5883	20.0498	18.0081	20.1907	20.2736	18.8129	19.4417	20.3707	17.7534	NA	20.0894	NA	18.125	20.2419	17.7462	18.9099	21.0583	19.2178	19.1531	NA	17.8985	20.5645	18.5373	NA	20.5098	18.0754
Obscn_A2AAJ9_T6518_2	Obscn	A2AAJ9	T6518	2	22.0277	22.0084	20.8787	21.6752	21.2043	21.0988	21.4238	21.7578	21.222	21.0832	21.1322	21.6262	21.232	20.8853	20.9618	20.8718	21.4776	21.5836	20.9918	21.7084	21.4884	21.7398	20.7742	21.5845	21.245	21.6215	21.6937	20.8417	20.8272	22.2031	21.1318	21.1072	21.8432	21.2706	21.0856	20.7771	21.1152	21.2603	21.9214	21.5331	22.3112	21.4972	22.2362	21.7441	21.8569
Obscn_A2AAJ9_S6522_2	Obscn	A2AAJ9	S6522	2	19.4871	20.9207	21.7096	19.2672	19.186	19.0686	19.1977	20.5772	19.9018	19.1401	19.2596	20.4888	19.2731	19.681	19.6912	19.6757	20.0506	20.5456	21.4742	21.0298	19.4981	20.9881	20.8186	19.7386	20.5072	20.3816	21.4391	20.0187	18.8818	21.0446	19.6541	20.1701	19.31	20.6172	19.8884	21.4248	19.7212	20.0458	20.8734	19.0633	19.7589	19.309	21.0281	19.928	20.7203
Obscn_A2AAJ9_S6522_1	Obscn	A2AAJ9	S6522	1	17.2996	16.5937	16.4092	16.2183	16.9108	16.8472	17.0091	17.0214	17.0718	16.2191	16.7503	16.34	16.8633	17.0386	16.9112	16.6679	17.1381	17.4227	16.9746	16.8122	16.6108	16.9275	16.8584	17.1608	17.1818	17.1541	17.0575	17.1101	16.4153	17.0532	17.0624	16.9292	16.7476	17.5463	17.3588	17.1943	16.9205	17.3945	16.0125	15.5947	16.0042	15.5181	15.9154	15.7536	16.0568
Obscn_A2AAJ9_T6518_1	Obscn	A2AAJ9	T6518	1	16.8955	16.7589	16.2184	16.6084	16.0005	16.2399	16.1138	16.3587	16.5956	16.3682	16.1912	16.1597	16.3722	16.1794	16.3108	15.8644	16.97	16.3164	16.4395	16.4833	16.5488	16.5104	16.3492	16.5489	16.4224	16.2742	16.4321	16.7526	15.8838	16.7967	16.4187	16.5102	16.4702	17.4671	16.3759	16.3224	16.3096	16.3373	15.6218	15.3977	15.9349	15.8541	15.6861	15.3037	15.7295
Obscn_A2AAJ9_S3154_1	Obscn	A2AAJ9	S3154	1	15.5724	15.5468	14.8838	NA	15.1365	NA	NA	14.8544	15.0684	NA	NA	15.5685	15.1394	NA	NA	15.2338	NA	15.4839	14.9542	15.3292	NA	NA	NA	NA	15.4037	NA	NA	NA	NA	15.1024	15.0941	NA	NA	NA	15.4903	15.1651	15.4647	15.0457	NA	15.1911	15.3987	NA	NA	NA	14.4
Obscn_A2AAJ9_T3149_1	Obscn	A2AAJ9	T3149	1	NA	NA	NA	14.942	NA	14.9575	14.9473	NA	NA	15.0539	14.9602	NA	14.9442	14.662	14.8804	NA	14.6812	NA	NA	NA	NA	14.4568	14.6724	NA	NA	14.8335	14.6485	14.5249	15.1803	NA	NA	NA	15.3107	15.1188	NA	NA	NA	NA	14.5023	NA	NA	14.6091	14.7571	14.6209	NA
Obscn_A2AAJ9_S6904_1	Obscn	A2AAJ9	S6904	1	20.2052	19.418	14.7809	20.4229	19.7244	20.1159	20.843	20.4679	20.0743	19.8067	20.1203	14.5305	14.8378	19.7475	13.5394	20.2894	14.9661	14.5728	19.7748	20.2155	20.928	13.9564	20.27	13.0068	19.1245	20.4873	20.6605	20.4712	13.0118	20.5904	20.7152	20.8331	21.0464	20.5025	14.1971	20.4822	20.8293	20.4391	13.2541	19.5366	20.5723	20.463	20.5855	20.806	20.4508
Obscn_A2AAJ9_S6903_1	Obscn	A2AAJ9	S6903	1	19.1188	18.7176	19.3856	15.3538	14.3723	14.5041	15.853	15.2223	14.7291	14.4051	19.0129	19.3378	19.3084	14.3286	18.6242	14.6906	19.3609	19.3516	14.9411	14.6513	14.737	19.6635	13.0844	19.0835	18.3418	14.2103	13.9022	14.2161	18.6687	13.0006	13.7912	19.6087	14.747	14.0722	19.5267	13.9805	14.8835	13.6411	19.5184	18.6604	13.8545	13.5913	13.4387	14.1493	19.4014
Obscn_A2AAJ9_S8161_1	Obscn	A2AAJ9	S8161	1	NA	NA	NA	NA	NA	NA	NA	16.3226	16.517	NA	NA	NA	NA	NA	16.3682	NA	NA	NA	NA	NA	15.6232	15.3239	NA	NA	NA	NA	NA	NA	NA	16.2355	NA	NA	NA	NA	NA	NA	NA	NA	NA	NA	NA	NA	NA	NA	NA
Obscn_A2AAJ9_S8167_1	Obscn	A2AAJ9	S8167	1	13.9246	NA	NA	NA	NA	NA	NA	NA	NA	16.2045	NA	NA	NA	NA	NA	NA	NA	15.7621	12.6627	15.2862	NA	NA	NA	NA	15.458	NA	15.8185	NA	NA	NA	NA	NA	NA	NA	NA	13.1675	13.5212	NA	NA	15.211	16.4075	16.1299	14.662	NA	NA
Obscn_A2AAJ9_S135_1	Obscn	A2AAJ9	S135	1	17.9843	17.7195	17.6878	17.9554	17.4553	17.7168	17.735	17.4797	17.9647	17.3905	17.2257	17.3589	17.7343	17.6936	17.5304	17.5044	17.5257	17.6765	17.5328	17.2961	17.3402	17.5448	16.9881	17.2036	17.6279	17.1174	17.3173	17.0077	17.0483	16.3145	17.5573	17.2455	17.3675	17.0006	17.1971	17.439	17.592	17.1483	15.894	15.9479	15.9475	16.098	15.7009	15.8902	15.8342
Obscn_A2AAJ9_S3325_1	Obscn	A2AAJ9	S3325	1	NA	NA	NA	NA	14.7787	NA	NA	NA	NA	NA	NA	NA	NA	NA	NA	NA	NA	NA	14.3108	NA	NA	NA	NA	NA	NA	NA	NA	NA	NA	NA	NA	NA	NA	NA	NA	NA	NA	NA	NA	NA	NA	NA	NA	NA	14.2295
Obscn_A2AAJ9_S3321_1	Obscn	A2AAJ9	S3321	1	14.6167	14.6528	11.811	15.1485	NA	14.3612	14.9607	15.0346	14.3545	14.4439	14.6288	14.614	14.6009	14.2471	NA	NA	NA	14.2192	NA	13.4789	13.5587	14.289	14.5967	14.3435	14.0112	13.3655	13.7309	14.8257	14.6621	14.6719	14.0167	14.7633	14.9605	13.9707	NA	14.5087	14.9242	14.9375	NA	13.1601	NA	NA	13.5039	14.8734	NA
Obscn_A2AAJ9_S7721_1	Obscn	A2AAJ9	S7721	1	22.0112	22.0923	21.6224	21.7151	21.9343	21.9119	22.0057	21.9921	21.8708	22.1894	21.8102	21.8824	21.9182	21.8677	21.8771	21.7229	21.7777	22.0701	21.9542	21.9423	21.9914	22.0015	22.0264	22.0614	21.776	21.8201	22.0658	21.9738	21.8593	22.1811	21.9409	22.4173	22.3294	22.2192	22.0183	22.1067	22.3645	21.8289	21.6944	21.9994	22.1845	21.8518	22.1956	22.0565	21.8363
Obscn_A2AAJ9_S7723_1	Obscn	A2AAJ9	S7723	1	NA	NA	NA	NA	NA	NA	NA	NA	NA	NA	NA	NA	NA	NA	NA	NA	NA	NA	NA	NA	NA	NA	NA	NA	NA	NA	NA	NA	NA	NA	NA	NA	NA	NA	NA	NA	NA	NA	NA	NA	NA	NA	NA	NA	NA
Obscn_A2AAJ9_S7723_2	Obscn	A2AAJ9	S7723	2	12.251	NA	NA	NA	10.9087	NA	NA	12.0923	NA	NA	12.0837	11.6772	8.15251	12.1694	NA	NA	NA	11.2127	NA	11.3047	NA	11.8275	NA	10.5122	10.7759	10.6942	11.1259	NA	10.743	10.8508	10.3494	NA	10.6964	NA	10.1765	NA	12.4859	10.2885	NA	11.5376	12.2359	NA	NA	NA	NA
Obscn_A2AAJ9_S7710_2	Obscn	A2AAJ9	S7710	2	12.251	11.7284	12.3001	12.4574	12.2281	12.3609	12.666	13.2095	NA	12.5108	12.0837	13.0709	12.2448	13.4994	12.3896	11.6044	12.1078	11.2127	11.6647	11.3047	11.17	11.8275	NA	11.9587	11.4205	10.6942	11.1259	12.0743	10.743	12.0424	11.9656	8.69309	10.6964	12.0028	11.5538	11.6553	13.5995	10.2885	12.5116	12.4081	12.2359	11.8966	NA	NA	12.3304
Obscn_A2AAJ9_S7721_2	Obscn	A2AAJ9	S7721	2	NA	11.7284	12.3001	12.4574	11.4895	12.3609	12.666	12.3179	NA	12.5108	NA	12.3799	12.1577	12.7678	12.3896	11.6044	12.1078	NA	11.6647	NA	11.17	NA	NA	11.2992	9.94792	NA	NA	12.0743	NA	11.2114	11.396	8.69309	NA	12.0028	10.8525	11.6553	12.7048	NA	12.5116	11.2659	NA	11.8966	NA	NA	12.3304
Obscn_A2AAJ9_S3089_1	Obscn	A2AAJ9	S3089	1	17.386	17.3716	16.9862	17.0276	17.2963	17.1097	17.2512	17.195	16.7549	16.3886	16.3177	16.9451	17.0444	16.3325	16.0984	16.4111	17.0579	17.5064	17.3121	17.4214	17.2168	17.1559	16.8334	16.9209	17.1591	17.2888	16.981	17.4401	16.5999	17.2785	16.7232	17.0705	17.586	16.7104	16.8031	17.0172	17.4143	16.6346	16.2797	16.4805	16.5016	16.1374	16.5606	16.5747	16.1873
Obscn_A2AAJ9_S6303_1	Obscn	A2AAJ9	S6303	1	14.6892	15.4424	14.7142	15.1085	15.3449	15.4318	15.5338	15.5513	15.0122	15.372	15.4733	14.4142	14.1666	14.9238	14.7906	15.2288	14.9733	14.9342	14.8554	15.1944	14.769	15.4747	15.5336	15.4902	14.803	14.6399	15.1941	15.55	15.3256	15.5614	14.2154	15.011	13.212	15.5976	14.5736	13.6893	13.3065	15.3661	14.7896	14.6966	15.0113	14.8484	14.904	14.93	14.8033
Obscn_A2AAJ9_S6702_1	Obscn	A2AAJ9	S6702	1	NA	NA	14.1443	NA	NA	14.1113	13.9155	14.4538	NA	14.2344	14.3263	14.4536	14.3884	14.0042	NA	13.8889	14.452	14.474	14.7325	14.6403	14.5354	14.7921	NA	14.6987	14.7759	14.4139	14.3901	14.3857	14.4225	14.7041	14.619	14.5657	14.4	14.5126	14.4469	14.5149	14.62	14.6269	NA	13.96	NA	13.9961	14.0204	13.9732	14.0474
Obscn_A2AAJ9_S6697_1	Obscn	A2AAJ9	S6697	1	NA	NA	NA	NA	NA	13.6412	NA	NA	13.5405	NA	NA	NA	NA	NA	NA	NA	NA	NA	NA	NA	NA	NA	NA	NA	NA	NA	NA	NA	NA	NA	NA	NA	NA	NA	NA	NA	NA	NA	NA	NA	NA	NA	NA	9.93499	13.5193
Obscn_A2AAJ9_S6701_1	Obscn	A2AAJ9	S6701	1	NA	NA	NA	NA	9.81001	NA	NA	NA	NA	NA	NA	NA	NA	NA	NA	NA	NA	NA	NA	NA	NA	NA	NA	NA	NA	9.75746	NA	NA	NA	NA	NA	NA	NA	NA	NA	NA	NA	NA	NA	NA	NA	NA	NA	NA	NA
Obscn_A2AAJ9_S3212_1	Obscn	A2AAJ9	S3212	1	13.3792	13.2945	NA	12.9808	13.4772	13.6038	13.111	13.7866	13.0944	13.6359	13.2414	13.3885	13.7796	13.1118	13.1781	12.8336	13.8345	13.989	13.6278	13.7273	13.1221	13.4773	13.5279	13.5686	13.4197	13.3346	13.633	13.9914	13.4912	13.4097	13.141	13.4003	11.4905	13.4254	12.7072	13.189	13.1709	13.3382	12.3337	12.6036	12.7856	11.99	12.9342	12.1484	12.1214
Obscn_A2AAJ9_S5708_1	Obscn	A2AAJ9	S5708	1	NA	NA	NA	NA	NA	NA	NA	NA	NA	NA	NA	NA	NA	NA	NA	NA	NA	NA	NA	NA	NA	NA	NA	NA	NA	NA	NA	NA	NA	NA	NA	NA	NA	NA	NA	NA	NA	NA	14.8496	NA	NA	NA	NA	NA	NA
Obscn_A2AAJ9_S5715_2	Obscn	A2AAJ9	S5715	2	NA	NA	NA	18.7559	NA	NA	NA	19.0519	NA	NA	NA	NA	NA	NA	18.0605	NA	NA	NA	NA	NA	NA	NA	NA	NA	NA	19.2521	NA	NA	NA	NA	NA	17.267	NA	NA	NA	NA	NA	NA	NA	NA	19.395	NA	NA	NA	NA
Obscn_A2AAJ9_S393_1	Obscn	A2AAJ9	S393	1	18.1108	18.5991	18.4003	18.1934	18.2296	18.3974	18.5591	18.5948	18.1046	17.9434	18.8042	18.3897	18.2307	18.1904	17.9936	18.6526	18.0614	18.3217	18.0104	17.6022	17.4588	17.373	17.8455	18.354	17.6958	17.6391	17.1719	17.848	18.2259	18.2183	17.2873	17.7823	18.4395	18.3945	17.5239	17.662	18.4186	17.8351	17.7392	17.6222	18.1226	17.5448	17.464	18.0573	17.7617
Obscn_A2AAJ9_Y400_2	Obscn	A2AAJ9	Y400	2	NA	NA	NA	13.2443	NA	NA	NA	13.2148	NA	13.502	13.9743	14.4284	14.2348	12.975	12.4877	NA	14.3359	13.0534	NA	13.2913	NA	NA	13.7888	14.0168	NA	12.481	12.317	12.8777	13.9496	13.8983	NA	14.1046	14.088	13.5262	13.7032	13.7699	NA	14.1213	14.2079	13.7097	14.6844	14.5572	NA	14.933	14.2513
Obscn_A2AAJ9_S393_2	Obscn	A2AAJ9	S393	2	NA	NA	NA	13.2443	NA	NA	NA	13.2148	NA	13.502	13.9743	14.4284	14.2348	12.975	12.4877	NA	14.3359	13.0534	NA	13.2913	NA	NA	13.7888	14.0168	NA	12.481	12.317	12.8777	13.9496	13.8983	NA	14.1046	14.088	13.5262	13.7032	13.7699	NA	14.1213	14.2079	13.7097	14.6844	14.5572	NA	14.933	14.2513
Obscn_A2AAJ9_S6_1	Obscn	A2AAJ9	S6	1	11.4627	13.0748	15.1151	14.7335	9.98199	15.4025	14.8782	15.7063	NA	14.7708	14.7447	15.4793	NA	14.9476	13.9791	14.4833	NA	14.4037	NA	NA	NA	13.2775	NA	14.9443	NA	14.8971	13.8186	NA	13.4922	13.9441	12.5531	14.1868	NA	13.3074	14.4795	NA	13.5778	14.2636	14.7812	14.6416	13.8709	NA	14.9538	15.1701	NA
Obscn_A2AAJ9_S202_1	Obscn	A2AAJ9	S202	1	17.2959	17.4844	17.0735	17.1089	17.2915	NA	17.2551	17.6571	17.3884	NA	NA	16.9231	16.5302	16.9148	17.3033	17.041	16.5623	17.6004	17.4044	NA	16.7218	16.7932	NA	16.9873	16.3538	NA	17.0959	NA	17.0057	16.8775	16.7424	NA	NA	16.7996	NA	NA	NA	NA	16.2197	16.4715	NA	NA	NA	NA	NA
Obscn_A2AAJ9_S6522_4	Obscn	A2AAJ9	S6522	4	24.5899	24.6457	24.4816	24.4002	24.1064	24.3469	24.4486	24.4689	24.6489	24.3038	24.5517	24.2308	24.53	24.1958	24.0646	24.5408	24.4449	24.4625	24.6002	24.3137	24.274	24.5486	24.2121	24.4787	23.8722	23.8677	24.3525	24.1779	24.3767	24.2792	24.7532	24.2933	24.614	24.2318	24.3694	24.1414	24.3104	24.6956	24.8495	24.4556	25.114	24.4618	24.8196	24.5534	24.4792
Obscn_A2AAJ9_T6518_4	Obscn	A2AAJ9	T6518	4	24.5904	24.639	24.4816	24.4002	24.1074	24.3459	24.4486	24.4689	24.6495	24.3083	24.5723	24.2308	24.53	24.1958	24.0646	24.5429	24.4161	24.4687	24.6	24.3236	24.274	24.5553	24.2121	24.4787	23.8772	23.8526	24.3525	24.1779	24.344	24.2937	24.7532	24.2932	24.628	24.1898	24.3694	24.1414	24.3169	24.7065	24.8495	24.4556	25.114	24.4869	24.8196	24.5456	24.4829
Obscn_A2AAJ9_T6516_4	Obscn	A2AAJ9	T6516	4	19.5415	17.2381	18.6257	18.4239	17.9601	19.0113	18.0545	18.6514	20.1225	18.3069	19.3529	15.4433	18.3987	17.6029	18.6191	18.1014	19.7607	19.079	11.5421	20.1189	18.8698	19.7591	14.8401	17.1763	18.4927	19.6597	19.5704	19.4358	20.0666	18.2717	18.9334	17.1629	19.2997	20.0948	19.4535	18.6614	18.1119	19.4309	14.3355	17.4912	18.5075	18.7069	17.0089	18.1157	17.171
Obscn_A2AAJ9_S6512_4	Obscn	A2AAJ9	S6512	4	24.5466	24.6371	24.4565	24.3784	24.0878	24.3186	24.4325	24.4502	24.5861	24.2979	24.5613	24.2275	24.5085	24.188	24.0473	24.5326	24.415	24.4398	24.6	24.283	24.2395	24.5083	24.2112	24.4787	23.8474	23.7995	24.2991	24.1431	24.3818	24.2905	24.7274	24.283	24.6058	24.1833	24.3208	24.119	24.3102	24.6795	24.8485	24.4535	25.1019	24.4863	24.8165	24.5429	24.4811
Obscn_A2AAJ9_S6520_4	Obscn	A2AAJ9	S6520	4	19.4389	16.8769	18.5152	18.2803	17.7435	18.812	17.9553	18.1929	20.0508	17.1806	17.5225	13.8733	18.4474	16.6704	17.6736	17.4149	19.7861	18.8134	20.4558	19.1515	18.8698	19.5896	13.6377	NA	18.2648	19.4246	20.7022	18.7895	16.7389	15.4677	18.9334	18.116	18.5907	19.7591	19.4535	18.1226	16.5457	18.9543	20.8819	16.9336	18.2094	14.326	15.4306	17.2225	14.8044
Obscn_A2AAJ9_S6512_2	Obscn	A2AAJ9	S6512	2	21.2487	NA	NA	20.717	NA	NA	NA	20.5498	20.625	20.6487	20.6721	20.7517	20.803	20.2494	20.5265	20.3659	20.2541	20.3281	NA	20.292	NA	NA	20.1215	20.515	NA	NA	20.0531	NA	20.3934	20.5635	20.4901	20.3805	20.8364	20.1222	20.2344	20.1522	20.493	20.3723	20.8032	20.8573	21.2328	20.8802	21.2546	20.7414	20.7752
Obscn_A2AAJ9_T6516_2	Obscn	A2AAJ9	T6516	2	NA	20.8375	NA	NA	20.0886	20.4255	20.7481	NA	NA	NA	NA	NA	NA	NA	NA	NA	NA	NA	NA	17.6041	20.0901	20.1439	NA	NA	19.9912	20.131	17.8272	19.9853	NA	NA	NA	NA	NA	NA	NA	NA	NA	NA	17.7551	18.3869	18.2037	NA	18.1955	NA	NA
Obscn_A2AAJ9_S6464_1	Obscn	A2AAJ9	S6464	1	NA	NA	NA	NA	13.5483	NA	NA	NA	NA	NA	NA	NA	NA	NA	NA	NA	NA	NA	13.4225	NA	NA	NA	NA	14.1442	NA	NA	NA	NA	NA	NA	NA	NA	NA	NA	NA	NA	NA	NA	NA	NA	NA	NA	NA	NA	NA
Obscn_A2AAJ9_S8108_1	Obscn	A2AAJ9	S8108	1	21.2121	19.452	19.8755	19.6565	21.466	21.37	21.8464	21.6903	20.8939	18.9079	21.2387	18.994	20.1242	21.6158	21.2471	20.0035	20.4562	20.1459	20.0259	20.1389	19.903	20.0758	20.1638	20.5667	20.9086	21.1046	20.4331	20.4969	20.3298	20.4078	20.0691	19.7268	20.4585	20.8794	20.4176	19.417	21.577	19.3955	20.8833	18.113	20.5466	19.9492	18.2238	21.1895	20.0186
Obscn_A2AAJ9_S8111_2	Obscn	A2AAJ9	S8111	2	16.0652	13.6088	14.6856	14.1542	16.1893	16.4356	16.8026	16.7539	15.6975	NA	15.8586	NA	12.7519	16.223	16.1366	14.3806	14.9559	14.5696	13.8913	14.6679	14.2295	14.338	14.4254	15.4174	15.1136	16.0648	15.0328	14.6025	15.1117	14.7045	13.8791	NA	NA	15.1657	14.5153	11.2572	14.151	13.6749	16.4212	NA	15.519	15.3659	13.1766	16.3519	15.1333
Obscn_A2AAJ9_S8108_2	Obscn	A2AAJ9	S8108	2	16.0652	13.6088	14.6856	14.1542	16.1893	16.4356	16.8026	16.7539	15.6975	NA	15.8586	NA	12.7519	16.223	16.1366	14.3806	14.9559	14.5696	13.8913	14.6679	14.2295	14.338	14.4254	15.4174	15.1136	16.0648	15.0328	14.6025	15.1117	14.7045	13.8791	NA	NA	15.1657	14.5153	11.2572	14.151	13.6749	16.4212	NA	15.519	15.3659	13.1766	16.3519	15.1333
Obscn_A2AAJ9_S5923_1	Obscn	A2AAJ9	S5923	1	14.1601	14.3541	NA	13.4655	13.8833	14.1111	14.0159	NA	NA	14.1665	14.8116	14.5374	14.8379	NA	13.8987	14.4709	NA	14.0823	NA	13.6149	12.8147	13.2029	14.3312	14.5566	13.313	NA	NA	14.3865	NA	14.7332	NA	14.1524	14.0911	14.3187	13.5618	NA	14.2575	NA	NA	12.647	NA	13.3573	NA	13.7003	13.4126
Obscn_A2AAJ9_T5924_1	Obscn	A2AAJ9	T5924	1	NA	NA	NA	13.4655	NA	NA	NA	NA	14.0858	NA	NA	NA	NA	14.3212	NA	NA	14.1758	NA	NA	NA	NA	NA	NA	NA	NA	13.8066	13.2835	NA	14.3104	NA	13.0394	NA	NA	NA	NA	13.5635	NA	13.9431	13.012	NA	12.6296	NA	13.1916	13.6995	NA
Obscn_A2AAJ9_S117_1	Obscn	A2AAJ9	S117	1	14.821	NA	10.7287	10.5147	10.276	14.718	9.93283	NA	NA	NA	12.3748	8.06355	9.56047	10.8361	10.9575	NA	NA	10.9317	NA	14.4571	NA	15.2467	11.7294	NA	9.49487	11.2917	NA	NA	11.7403	NA	NA	11.8022	12.7926	11.2895	9.20884	11.605	11.5722	NA	NA	NA	NA	NA	NA	NA	8.23204
Obscn_A2AAJ9_S7921_2	Obscn	A2AAJ9	S7921	2	15.0377	NA	NA	14.356	NA	15.0654	NA	NA	NA	17.2643	NA	NA	NA	NA	17.1653	NA	NA	15.0185	NA	NA	NA	14.6406	NA	17.4425	NA	NA	NA	NA	NA	15.3494	NA	NA	14.8531	NA	NA	14.3032	NA	NA	NA	NA	NA	NA	NA	NA	NA
Obscn_A2AAJ9_S7910_2	Obscn	A2AAJ9	S7910	2	15.0377	NA	NA	14.356	NA	15.0654	NA	NA	NA	17.2643	NA	NA	NA	NA	17.1653	NA	NA	15.0185	NA	NA	NA	14.6406	NA	17.4425	NA	NA	NA	NA	NA	15.3494	NA	NA	14.8531	NA	NA	14.3032	NA	NA	NA	NA	NA	NA	16.0564	NA	NA
Obscn_A2AAJ9_T7918_1	Obscn	A2AAJ9	T7918	1	NA	NA	NA	NA	NA	NA	NA	NA	NA	NA	NA	NA	NA	NA	NA	NA	NA	NA	NA	NA	NA	NA	NA	NA	NA	NA	NA	NA	NA	NA	NA	NA	NA	NA	NA	NA	NA	NA	NA	NA	NA	NA	NA	NA	NA
Obscn_A2AAJ9_S7921_1	Obscn	A2AAJ9	S7921	1	16.2943	16.5012	16.5696	16.9061	16.1455	NA	16.8475	16.7848	16.6682	16.8746	17.0113	16.8809	16.8182	16.5843	16.7639	16.9035	16.7876	16.8794	16.7829	16.6858	16.6695	16.7907	17.0067	16.866	16.5028	16.4409	16.8319	17.0625	17.1549	17.2702	17.1861	16.9009	16.9219	16.9554	16.8626	16.5815	16.7088	16.8058	16.3081	15.9983	16.0759	15.81	16.5864	16.3648	15.998
Obscn_A2AAJ9_T7918_2	Obscn	A2AAJ9	T7918	2	NA	NA	NA	NA	NA	NA	NA	NA	NA	NA	NA	NA	NA	NA	NA	NA	NA	NA	NA	NA	NA	NA	NA	NA	NA	NA	NA	NA	NA	NA	NA	NA	NA	NA	NA	NA	NA	NA	NA	NA	NA	NA	16.0564	NA	NA
Obscn_A2AAJ9_S7908_1	Obscn	A2AAJ9	S7908	1	NA	NA	19.4521	NA	NA	NA	NA	NA	NA	NA	NA	NA	NA	NA	NA	NA	NA	NA	NA	18.6581	NA	NA	NA	NA	NA	NA	NA	NA	NA	NA	NA	NA	NA	NA	NA	NA	NA	NA	NA	NA	19.6161	NA	NA	19.825	NA
Obscn_A2AAJ9_S7910_1	Obscn	A2AAJ9	S7910	1	19.7358	19.7493	NA	19.3274	19.4262	19.3976	19.4029	19.4943	19.2641	19.2547	20.0266	20.1593	20.2029	19.2082	19.3643	19.9451	20.1808	20.2053	19.0163	NA	18.837	18.6971	19.619	20.0546	19.0647	19.0883	18.9544	19.1917	19.898	20.2674	19.852	20.4611	20.7909	20.4033	20.0335	20.322	20.7222	19.6813	19.7838	19.3749	NA	19.309	19.7169	NA	19.3524
Obscn_A2AAJ9_T5022_1	Obscn	A2AAJ9	T5022	1	NA	NA	NA	NA	NA	NA	NA	15.7121	NA	NA	NA	NA	13.4726	NA	NA	NA	NA	NA	NA	NA	NA	11.805	14.0025	NA	NA	NA	NA	NA	NA	NA	NA	NA	NA	NA	NA	NA	13.6431	NA	NA	NA	NA	NA	NA	18.3737	NA
Obscn_A2AAJ9_S5021_1	Obscn	A2AAJ9	S5021	1	18.6923	18.9531	18.6803	18.6522	19.1247	18.9867	19.0188	19.3466	18.6572	18.2383	18.9389	18.6246	18.4515	18.7345	17.9422	18.8091	18.3188	19.0791	18.9926	19.172	18.8648	18.789	19.4082	19.3231	18.6931	19.0505	18.2933	19.3556	19.0016	19.4633	18.2466	18.9225	18.6516	19.089	18.4824	18.0122	18.5309	18.5801	18.3035	18.1777	18.1366	18.0016	18.1403	NA	18.5222
Obscn_A2AAJ9_T5029_1	Obscn	A2AAJ9	T5029	1	NA	NA	NA	NA	NA	NA	NA	NA	NA	12.3898	NA	NA	15.4293	13.0399	10.4464	NA	NA	NA	NA	NA	NA	NA	NA	NA	NA	NA	NA	NA	NA	NA	11.7759	NA	NA	NA	NA	14.9574	NA	NA	NA	NA	NA	NA	NA	15.7002	NA
Obscn_A2AAJ9_T5017_1	Obscn	A2AAJ9	T5017	1	NA	15.2051	NA	NA	15.0742	15.7251	NA	NA	16.8632	16.6729	16.5154	NA	NA	NA	16.5558	NA	NA	NA	NA	NA	NA	NA	NA	16.027	16.4616	NA	NA	NA	15.4754	NA	NA	13.6859	NA	NA	15.7726	NA	NA	NA	12.2722	12.6252	NA	NA	NA	NA	NA
Obscn_A2AAJ9_T5767_2	Obscn	A2AAJ9	T5767	2	13.0337	NA	NA	NA	NA	NA	NA	NA	NA	NA	NA	NA	NA	NA	NA	NA	NA	NA	NA	NA	NA	NA	NA	NA	NA	NA	NA	NA	NA	NA	NA	NA	NA	NA	NA	NA	NA	NA	NA	NA	NA	NA	14.2418	NA	NA
Obscn_A2AAJ9_S5764_2	Obscn	A2AAJ9	S5764	2	13.0337	NA	NA	NA	NA	NA	NA	NA	NA	NA	NA	NA	NA	NA	NA	NA	NA	NA	NA	NA	NA	NA	NA	NA	NA	NA	NA	NA	NA	NA	NA	NA	NA	NA	NA	NA	NA	NA	NA	NA	NA	NA	14.2418	NA	NA
Obscn_A2AAJ9_S4254_1	Obscn	A2AAJ9	S4254	1	NA	13.1567	14.185	15.2966	NA	14.4821	15.3627	14.7613	13.7832	14.5534	13.8642	14.1386	14.1113	14.2423	14.0375	13.831	14.1677	NA	13.5461	15.0927	15.0298	15.2741	14.0442	14.7181	14.7024	15.1199	15.3188	15.4019	14.1655	15.2394	14.4015	14.9047	14.7236	14.4344	14.4117	14.4159	14.6243	14.6712	NA	14.0983	14.5269	14.4734	14.8703	14.1736	14.5638
Obscn_A2AAJ9_T5737_1	Obscn	A2AAJ9	T5737	1	16.1087	16.6911	16.6137	16.7748	16.1002	16.5215	16.5819	16.8278	16.6997	16.9658	16.6351	16.4633	16.1473	16.8509	16.4915	16.4618	16.2771	16.6304	16.6038	16.4915	16.1549	16.3746	16.4386	16.7059	16.4371	16.172	16.402	16.5285	16.7989	16.4719	15.8185	16.4839	17.0885	16.3368	15.9106	16.2934	16.9957	15.6668	16.1799	16.6792	16.8976	16.6778	16.8686	16.7934	16.9537
Obscn_A2AAJ9_T5737_2	Obscn	A2AAJ9	T5737	2	14.9039	14.9608	NA	NA	11.717	NA	NA	NA	NA	NA	NA	NA	NA	NA	15.046	NA	NA	14.8586	15.1875	NA	NA	NA	NA	15.3139	NA	15.0665	NA	NA	NA	14.3266	NA	14.152	NA	NA	14.8737	11.7284	NA	NA	15.5001	16.4101	NA	NA	16.2453	NA	NA
Obscn_A2AAJ9_S5736_2	Obscn	A2AAJ9	S5736	2	NA	14.9608	NA	NA	NA	NA	NA	NA	NA	NA	NA	NA	NA	NA	15.046	NA	NA	14.8586	15.1875	NA	NA	NA	NA	15.3139	NA	15.0665	NA	NA	NA	14.3266	NA	NA	NA	NA	14.8737	NA	NA	NA	15.5001	16.0729	NA	NA	16.2453	NA	NA
Obscn_A2AAJ9_Y5735_2	Obscn	A2AAJ9	Y5735	2	15.8635	14.467	NA	NA	11.717	NA	NA	NA	NA	13.923	NA	NA	12.4999	NA	NA	NA	NA	NA	NA	NA	NA	NA	NA	NA	NA	NA	NA	NA	NA	NA	NA	14.152	NA	NA	13.9069	11.7284	NA	NA	NA	14.1481	NA	NA	NA	NA	NA
Obscn_A2AAJ9_S5732_2	Obscn	A2AAJ9	S5732	2	14.8219	14.467	NA	NA	NA	NA	NA	NA	NA	13.923	NA	NA	12.4999	NA	NA	NA	NA	NA	NA	NA	NA	NA	NA	NA	NA	NA	NA	NA	NA	NA	NA	NA	NA	NA	13.9069	NA	NA	NA	NA	NA	NA	NA	NA	NA	NA
Obscn_A2AAJ9_T5737_3	Obscn	A2AAJ9	T5737	3	16.116	15.3235	15.522	15.128	NA	15.7747	NA	16.2055	NA	14.8438	15.2765	14.1978	14.8301	14.2927	15.4145	15.9227	15.2524	12.7299	14.8931	14.9136	15.0401	15.1636	11.2005	15.1795	13.7446	15.3873	15.451	15.2577	15.7286	15.126	13.7797	14.912	14.9212	15.3476	14.9855	13.2929	14.7427	15.2143	15.7271	15.0925	NA	NA	13.5939	NA	14.0949
Obscn_A2AAJ9_Y5735_3	Obscn	A2AAJ9	Y5735	3	16.116	15.3235	15.522	15.128	NA	15.7747	NA	16.2055	NA	14.8438	15.2765	14.1978	14.8301	14.2927	15.4145	15.9227	15.2524	12.7299	14.8931	14.9136	15.0401	15.1636	11.2005	15.1795	13.7446	15.3873	15.451	15.2577	15.7286	15.126	13.7797	14.912	14.9212	15.3476	14.9855	13.2929	14.7427	15.2143	15.7271	15.0925	NA	NA	13.5939	NA	14.0949
Obscn_A2AAJ9_T5727_3	Obscn	A2AAJ9	T5727	3	NA	NA	NA	NA	NA	NA	NA	NA	NA	NA	NA	NA	NA	NA	NA	NA	NA	NA	NA	NA	NA	NA	NA	NA	NA	NA	NA	NA	NA	NA	NA	NA	NA	NA	NA	NA	NA	NA	NA	NA	NA	NA	NA	NA	NA
Obscn_A2AAJ9_S5732_3	Obscn	A2AAJ9	S5732	3	14.4965	NA	NA	NA	NA	NA	NA	NA	NA	NA	NA	NA	NA	NA	NA	NA	NA	NA	NA	NA	NA	NA	NA	NA	NA	NA	NA	NA	NA	NA	NA	NA	NA	NA	NA	NA	NA	NA	NA	NA	NA	NA	NA	NA	NA
Obscn_A2AAJ9_S5732_1	Obscn	A2AAJ9	S5732	1	14.4418	14.5399	14.2443	14.9216	13.2808	14.0179	NA	14.418	14.649	15.2748	15.1648	NA	13.6856	NA	15.0336	14.6925	NA	14.5378	14.4482	NA	NA	13.5514	14.6981	12.2026	14.4298	NA	13.6943	12.8344	NA	NA	NA	NA	NA	NA	13.7714	NA	13.872	NA	NA	NA	14.0668	14.9706	14.5005	NA	NA
Obscn_A2AAJ9_S5736_3	Obscn	A2AAJ9	S5736	3	15.548	15.3235	15.522	15.128	NA	15.7747	NA	16.2055	NA	14.8438	15.2765	14.1978	14.8301	14.2927	15.4145	15.9227	15.2524	12.7299	14.8931	14.9136	15.0401	15.1636	11.2005	15.1795	13.7446	15.3873	15.451	15.2577	15.7286	15.126	13.7797	14.912	14.9212	15.3476	14.9855	13.2929	14.7427	15.2143	15.7271	15.0925	NA	NA	13.5939	NA	14.0949
Obscn_A2AAJ9_S3414_1	Obscn	A2AAJ9	S3414	1	14.2504	14.812	NA	NA	NA	NA	15.7601	NA	15.6531	NA	16.0333	NA	NA	NA	NA	NA	NA	NA	NA	NA	NA	NA	15.383	15.6654	NA	NA	NA	15.2676	15.7313	NA	NA	15.2876	NA	15.5762	NA	NA	NA	15.1842	NA	NA	NA	NA	NA	NA	NA
Obscn_A2AAJ9_T3412_1	Obscn	A2AAJ9	T3412	1	NA	NA	15.4594	15.8948	NA	15.0975	NA	16.4019	NA	15.5541	NA	NA	15.8025	15.8567	15.5011	NA	15.6087	NA	NA	13.8955	13.9491	14.8579	NA	NA	NA	NA	NA	NA	NA	15.9795	NA	NA	NA	NA	14.3908	NA	15.875	NA	NA	NA	NA	NA	NA	NA	NA
Obscn_A2AAJ9_S7150_1	Obscn	A2AAJ9	S7150	1	21.1366	21.1661	20.8537	20.9008	20.8805	20.9092	20.9249	21.0912	21.2767	21.1406	20.8959	20.9755	21.1242	21.0847	20.9625	20.7061	20.8844	21.3619	20.8802	20.9207	20.9164	20.8923	20.9673	21.06	20.833	20.8557	20.7983	20.8343	20.9182	20.7389	20.9816	21.0975	21.1622	20.752	20.8168	21.1918	21.0662	20.8066	20.5035	20.7718	20.8427	20.481	20.9467	20.6211	20.5771
Obscn_A2AAJ9_S6160_1	Obscn	A2AAJ9	S6160	1	NA	14.4122	13.6177	NA	14.2489	NA	NA	NA	NA	NA	14.1362	13.7706	NA	14.5716	14.5899	14.0768	NA	13.9981	NA	NA	NA	NA	13.379	14.161	13.8171	NA	NA	NA	NA	NA	NA	NA	NA	NA	NA	NA	13.871	NA	NA	NA	14.3707	NA	NA	14.0984	NA
Obscn_A2AAJ9_T6161_1	Obscn	A2AAJ9	T6161	1	14.3845	NA	NA	13.6995	NA	14.5547	13.611	14.1441	14.0971	14.5501	NA	NA	14.0942	NA	NA	NA	NA	NA	NA	NA	13.4119	NA	NA	NA	NA	NA	12.2748	13.0518	14.3929	14.3347	NA	13.2984	NA	14.4105	NA	NA	NA	NA	NA	NA	14.3926	13.1597	14.9167	NA	14.1396
Obscn_A2AAJ9_S165_1	Obscn	A2AAJ9	S165	1	12.6177	12.6735	NA	NA	NA	NA	NA	12.759	12.4937	NA	11.7019	11.7798	NA	NA	12.1711	12.2529	12.3026	11.6798	12.4295	12.7741	13.2941	NA	NA	NA	NA	12.7708	NA	NA	NA	12.3019	11.473	NA	12.0555	12.5808	11.9058	12.212	11.9187	NA	NA	NA	NA	NA	NA	NA	12.5696
Obscn_A2AAJ9_S6512_1	Obscn	A2AAJ9	S6512	1	26.0651	26.1235	25.9426	26.2728	25.9497	26.1594	26.1929	26.3413	26.1965	26.4247	26.3622	26.2148	25.9639	26.2547	26.2616	26.3333	26.1377	26.2595	26.0265	26.0437	26.0956	25.9661	26.2023	26.5133	26.1628	26.1535	26.2935	26.3525	26.4201	26.697	25.882	26.1107	26.3927	26.64	25.9124	26.0694	26.4891	26.0381	25.9418	26.5366	26.3926	26.1231	26.8222	26.4777	26.1928
Obscn_A2AAJ9_T6516_1	Obscn	A2AAJ9	T6516	1	NA	NA	NA	NA	NA	NA	NA	NA	NA	NA	NA	NA	NA	NA	NA	NA	NA	NA	NA	NA	NA	NA	NA	NA	NA	NA	NA	NA	NA	NA	NA	NA	NA	NA	NA	NA	19.2911	NA	NA	NA	NA	NA	NA	NA	NA
Obscn_A2AAJ9_T6624_1	Obscn	A2AAJ9	T6624	1	NA	NA	NA	NA	NA	NA	NA	NA	NA	NA	NA	NA	NA	NA	NA	NA	NA	NA	NA	NA	NA	NA	NA	NA	NA	NA	NA	NA	NA	NA	NA	NA	NA	NA	NA	NA	NA	NA	NA	14.2727	NA	NA	14.7842	NA	NA
Obscn_A2AAJ9_S6618_1	Obscn	A2AAJ9	S6618	1	15.2042	15.0729	14.9491	15.2711	15.0336	15.4088	15.1791	14.9838	15.5081	15.4848	15.4271	15.2319	15.2697	15.3386	15.3073	15.6424	15.173	15.5863	14.7881	14.5385	14.731	15.1997	14.6726	15.0913	14.2503	14.7541	14.3348	14.6634	15.0123	14.9909	15.0479	14.6233	14.5505	14.8926	14.8366	14.6183	14.9904	14.8747	14.0274	13.6214	12.9546	13.709	12.9658	NA	13.2635
Obscn_A2AAJ9_T6747_1	Obscn	A2AAJ9	T6747	1	13.8804	14.3356	NA	NA	NA	NA	NA	NA	NA	NA	NA	NA	NA	NA	NA	NA	NA	NA	NA	NA	NA	NA	NA	NA	NA	NA	13.3754	NA	NA	NA	NA	12.9594	NA	NA	NA	NA	NA	NA	14.1812	NA	14.051	NA	NA	NA	NA
Obscn_A2AAJ9_S7807_2	Obscn	A2AAJ9	S7807	2	17.3103	17.5046	17.1669	18.0048	17.0458	17.1716	17.1197	17.0653	16.9572	NA	17.0339	16.9734	17.1307	16.9127	16.7229	16.8924	16.9708	16.768	17.2664	NA	NA	NA	NA	NA	17.1325	NA	NA	NA	NA	NA	NA	NA	NA	NA	NA	NA	NA	NA	NA	NA	NA	NA	18.0784	NA	17.1477
Obscn_A2AAJ9_S7779_2	Obscn	A2AAJ9	S7779	2	17.3103	17.5046	17.1669	17.0445	17.0458	17.1716	17.1197	17.0653	16.9572	NA	NA	16.9734	17.1307	16.9127	NA	16.8924	16.9708	16.768	17.2664	NA	NA	NA	NA	NA	17.1325	NA	NA	NA	NA	NA	NA	NA	NA	NA	NA	NA	NA	NA	NA	NA	NA	NA	17.5432	NA	NA
Obscn_A2AAJ9_S7777_2	Obscn	A2AAJ9	S7777	2	NA	NA	NA	16.964	NA	NA	NA	NA	NA	NA	17.0339	NA	NA	NA	16.7229	NA	NA	NA	NA	NA	NA	NA	NA	NA	NA	NA	NA	NA	NA	NA	NA	NA	NA	NA	NA	NA	NA	NA	NA	NA	NA	NA	16.3882	NA	17.1477
Obscn_A2AAJ9_T7790_2	Obscn	A2AAJ9	T7790	2	NA	NA	NA	NA	NA	NA	NA	NA	NA	NA	NA	NA	NA	NA	NA	NA	NA	NA	NA	NA	NA	NA	NA	NA	NA	NA	NA	NA	NA	NA	NA	NA	NA	NA	NA	NA	NA	NA	NA	NA	NA	NA	NA	NA	NA
Obscn_A2AAJ9_S7779_1	Obscn	A2AAJ9	S7779	1	NA	NA	NA	NA	NA	NA	14.9827	NA	NA	15.4123	NA	NA	NA	15.0537	NA	NA	NA	14.6819	13.6235	NA	NA	NA	NA	NA	NA	NA	NA	NA	NA	NA	NA	NA	NA	NA	NA	NA	NA	13.1919	NA	NA	NA	NA	NA	14.8009	NA
Obscn_A2AAJ9_S7798_1	Obscn	A2AAJ9	S7798	1	NA	NA	NA	NA	NA	NA	NA	NA	15.0797	NA	NA	NA	14.5068	15.1093	NA	14.4348	14.7296	NA	NA	NA	NA	NA	NA	NA	NA	NA	NA	NA	NA	NA	NA	NA	NA	NA	NA	NA	NA	NA	NA	NA	NA	NA	NA	NA	NA
Obscn_A2AAJ9_S7777_1	Obscn	A2AAJ9	S7777	1	15.0936	15.2478	14.7534	14.712	14.9069	15.3748	NA	14.9223	NA	NA	15.1215	NA	NA	NA	NA	NA	14.8075	14.7961	NA	NA	NA	NA	NA	NA	NA	NA	NA	NA	12.1239	NA	NA	NA	12.6496	NA	13.0874	NA	NA	6.27993	14.7411	14.6482	14.5451	14.355	14.8122	NA	14.6072
Obscn_A2AAJ9_S6336_1	Obscn	A2AAJ9	S6336	1	17.0366	17.1765	17.1287	17.4749	16.9871	17.4171	17.758	17.8684	17.7685	17.2637	17.9527	17.8325	17.7683	17.7578	17.0778	17.9822	17.788	17.5434	17.0899	17.3058	17.1327	17.4634	17.8932	18.0594	16.7144	17.1957	16.9357	17.52	17.9663	17.8634	17.1064	17.9097	18.1529	18.169	17.394	17.3964	18.0332	17.6428	16.3547	16.6392	16.9373	16.8915	16.3026	17.0111	17.0425
Obscn_A2AAJ9_S6538_2	Obscn	A2AAJ9	S6538	2	13.9691	NA	13.1796	13.5037	13.7246	14.1096	13.3194	13.7659	13.083	12.7062	12.7006	NA	NA	NA	12.7545	NA	16.0039	NA	14.5355	NA	14.1595	14.6218	13.0899	12.8741	NA	14.3526	13.5848	13.6315	11.6945	12.3648	12.1087	NA	NA	14.1186	13.37	NA	NA	NA	14.1367	11.8142	12.764	NA	13.7685	10.8261	13.1386
Obscn_A2AAJ9_S6537_2	Obscn	A2AAJ9	S6537	2	NA	NA	NA	NA	NA	NA	NA	NA	NA	NA	NA	NA	NA	NA	NA	NA	15.1525	NA	NA	NA	NA	14.12	NA	NA	NA	NA	NA	NA	NA	NA	NA	NA	12.5365	NA	NA	NA	NA	NA	NA	NA	NA	NA	NA	NA	NA
Obscn_A2AAJ9_S6539_2	Obscn	A2AAJ9	S6539	2	13.9691	NA	13.1796	13.5037	13.7246	14.1096	13.3194	13.7659	13.083	12.7062	12.7006	NA	NA	NA	12.7545	NA	14.8382	NA	14.5355	NA	14.1595	14.1356	13.0899	12.8741	NA	14.3526	13.5848	13.6315	11.6945	12.3648	12.1087	NA	12.5365	14.1186	13.37	NA	NA	NA	14.1367	11.8142	12.764	NA	13.7685	10.8261	13.1386
Obscn_A2AAJ9_S6541_2	Obscn	A2AAJ9	S6541	2	NA	NA	NA	NA	NA	NA	NA	NA	NA	NA	NA	NA	NA	NA	NA	NA	NA	NA	NA	NA	NA	NA	NA	NA	NA	NA	NA	NA	NA	NA	NA	NA	NA	NA	NA	NA	NA	NA	NA	NA	NA	NA	NA	NA	NA
Obscn_A2AAJ9_S6533_2	Obscn	A2AAJ9	S6533	2	NA	NA	NA	NA	NA	NA	NA	NA	NA	NA	NA	NA	NA	NA	NA	NA	NA	NA	NA	NA	NA	NA	NA	NA	NA	NA	NA	NA	NA	NA	NA	NA	NA	NA	NA	NA	NA	NA	NA	NA	NA	NA	NA	NA	NA
Obscn_A2AAJ9_S6531_2	Obscn	A2AAJ9	S6531	2	NA	NA	NA	NA	NA	NA	NA	NA	NA	NA	NA	NA	NA	NA	NA	NA	NA	NA	NA	NA	NA	NA	NA	NA	NA	NA	NA	NA	NA	NA	NA	NA	NA	NA	NA	NA	NA	NA	NA	NA	NA	NA	NA	NA	NA
Obscn_A2AAJ9_S7815_1	Obscn	A2AAJ9	S7815	1	14.3332	13.2165	13.7572	NA	15.359	14.9848	15.8064	15.7287	14.5963	NA	15.7516	NA	NA	15.8602	NA	NA	14.7373	14.5901	13.4413	NA	NA	13.9521	NA	NA	14.3401	14.9214	NA	14.1869	NA	14.1783	NA	14.87	NA	14.7448	15.0609	14.7348	15.6515	NA	15.4228	NA	15.4797	NA	NA	16.2174	15.2599
Obscn_A2AAJ9_S7819_1	Obscn	A2AAJ9	S7819	1	NA	NA	NA	NA	NA	NA	NA	NA	NA	NA	NA	NA	13.1228	NA	NA	13.1257	NA	NA	NA	NA	NA	NA	NA	NA	NA	NA	NA	NA	NA	NA	NA	NA	14.4095	NA	NA	NA	NA	NA	NA	NA	NA	NA	NA	NA	NA
Obscn_A2AAJ9_S3234_1	Obscn	A2AAJ9	S3234	1	14.0105	14.6743	14.5551	14.6562	14.5426	15.0582	15.2651	15.495	15.0845	15.3934	15.2795	14.8936	15.0727	14.5524	15.0171	14.5986	14.6829	13.7403	14.2366	14.6659	14.222	14.7296	13.9368	15.0668	13.5082	14.867	13.9308	15.2149	14.7335	15.2611	14.026	15.2159	14.9764	14.2846	14.7728	14.1902	14.9935	14.9984	15.0548	13.4611	14.0484	14.3262	15.0641	13.9342	14.0855
Obscn_A2AAJ9_S3162_1	Obscn	A2AAJ9	S3162	1	NA	NA	NA	NA	NA	NA	10.5788	9.69611	8.95869	NA	9.92033	9.51545	10.6859	NA	NA	NA	10.6323	NA	NA	NA	NA	NA	8.76408	9.96947	NA	NA	NA	8.6427	10.4959	9.48482	9.79885	9.18062	10.3389	8.59772	NA	10.0415	9.93455	9.83898	NA	NA	NA	NA	NA	6.62969	8.42916
Obscn_A2AAJ9_S236_1	Obscn	A2AAJ9	S236	1	22.8225	22.3753	21.9561	22.781	22.4794	22.2629	22.5873	20.1703	22.7311	21.3119	20.2415	19.7923	18.9843	20.0972	20.5763	22.6093	21.4533	22.5277	NA	NA	NA	NA	NA	NA	NA	NA	NA	NA	NA	NA	NA	9.18335	NA	NA	NA	NA	NA	NA	20.9202	20.6003	20.4161	19.6925	22.213	NA	NA
Obscn_A2AAJ9_T242_1	Obscn	A2AAJ9	T242	1	NA	21.3634	NA	NA	NA	19.341	22.866	NA	17.2957	22.8554	19.4439	NA	22.9384	21.0502	22.7106	NA	NA	21.2258	NA	NA	NA	NA	NA	NA	NA	NA	NA	NA	NA	NA	NA	NA	NA	12.7525	NA	NA	10.8993	NA	NA	21.5914	22.1744	20.841	22.5272	20.7379	22.2552
Sh3pxd2b_A2AAY5_S620_1	Sh3pxd2b	A2AAY5	S620	1	19.3256	19.0602	18.9404	18.8168	19.0633	18.9644	19.0466	18.8725	19.0342	19.0181	18.9635	18.6429	18.3595	19.3771	19.3758	18.9589	18.8288	18.7883	18.9872	18.2413	18.3455	18.6811	18.5144	19.0676	18.7446	18.8444	18.693	18.9535	19.1055	19.4091	18.5319	18.2156	18.2376	19.0732	18.3967	18.1867	18.096	18.9406	17.8581	18.2288	17.9048	17.7097	17.575	17.9032	17.9285
Sh3pxd2b_A2AAY5_S505_1	Sh3pxd2b	A2AAY5	S505	1	NA	NA	NA	NA	NA	NA	NA	NA	NA	NA	NA	NA	16.7672	NA	NA	16.8213	16.7514	NA	NA	NA	NA	NA	17.1699	NA	NA	NA	NA	NA	NA	16.9819	NA	NA	NA	NA	NA	17.3126	NA	NA	NA	NA	NA	NA	NA	NA	NA
Sh3pxd2b_A2AAY5_S499_1	Sh3pxd2b	A2AAY5	S499	1	NA	NA	NA	NA	NA	NA	NA	NA	NA	NA	NA	NA	NA	NA	NA	NA	NA	NA	NA	NA	NA	NA	NA	NA	NA	NA	NA	NA	NA	16.9819	NA	NA	NA	NA	NA	NA	NA	NA	NA	NA	NA	NA	NA	NA	NA
Sh3pxd2b_A2AAY5_S503_1	Sh3pxd2b	A2AAY5	S503	1	NA	NA	16.8499	NA	NA	NA	NA	NA	NA	NA	NA	NA	NA	NA	17.1394	NA	NA	NA	NA	NA	17.0957	NA	NA	NA	NA	17.2679	17.2179	NA	NA	NA	NA	NA	NA	17.2362	NA	NA	NA	17.332	NA	NA	NA	NA	NA	NA	NA
Sh3pxd2b_A2AAY5_Y508_1	Sh3pxd2b	A2AAY5	Y508	1	NA	NA	NA	NA	17.7402	NA	NA	NA	NA	NA	NA	NA	NA	NA	NA	NA	NA	NA	NA	NA	NA	NA	NA	NA	NA	NA	NA	NA	NA	NA	NA	NA	NA	NA	NA	NA	NA	NA	NA	NA	NA	NA	NA	NA	NA
Sh3pxd2b_A2AAY5_S500_1	Sh3pxd2b	A2AAY5	S500	1	NA	NA	NA	NA	NA	17.2974	NA	NA	NA	NA	NA	NA	NA	NA	NA	NA	NA	NA	17.0671	NA	NA	NA	17.06	16.9191	17.2338	NA	NA	NA	NA	NA	NA	NA	NA	NA	NA	NA	NA	NA	NA	17.5235	NA	NA	NA	NA	NA
Sh3pxd2b_A2AAY5_T506_1	Sh3pxd2b	A2AAY5	T506	1	NA	NA	NA	NA	NA	NA	17.4947	17.2506	16.7033	NA	NA	17.6595	17.9816	17.6853	NA	NA	NA	NA	17.5187	17.2333	NA	17.3531	NA	NA	NA	17.2207	NA	17.2121	NA	NA	NA	17.5061	NA	NA	NA	NA	18.1078	NA	NA	NA	NA	17.9251	17.9532	18.2881	17.5774
Sh3pxd2b_A2AAY5_S551_1	Sh3pxd2b	A2AAY5	S551	1	15.5103	15.4333	15.4947	15.4686	16.1845	16.2359	13.8774	14.1076	15.5246	14.0311	13.8464	15.7256	15.3424	15.1345	15.01	15.01	15.5739	15.1872	16.6443	16.4393	14.3118	15.2383	16.2912	15.4402	16.2991	15.9311	15.2491	15.7175	15.2023	15.6539	16.1923	16.2212	15.9663	15.6277	16.3167	15.9178	16.2887	16.3323	16.192	16.3114	15.7938	15.7155	15.7675	14.4037	15.6526
Arhgap27_A2AB59_S155_1	Arhgap27	A2AB59	S155	1	15.2328	15.1556	15.1312	15.1541	15.3308	15.3441	15.1769	15.3902	15.4402	15.178	15.5689	14.6645	15.3836	15.4068	15.294	15.4155	14.5789	15.5439	15.2175	14.7617	15.1013	14.9202	15.1912	14.9225	15.1851	14.8527	14.8178	14.661	14.6888	14.7881	13.7819	14.2021	14.0251	14.4895	14.5297	14.6101	14.9425	14.7587	14.6163	14.5336	14.0819	14.3705	14.3989	14.3129	14.778
Arhgap27_A2AB59_Y227_1	Arhgap27	A2AB59	Y227	1	16.3175	16.4822	16.6364	16.6989	16.4673	16.7783	16.4592	16.2129	16.6066	17.0198	16.507	16.8675	16.7881	16.9739	16.9111	17.039	16.4862	16.6483	16.1164	16.42	16.4626	16.5721	16.5508	16.4064	16.1683	15.8743	15.9328	16.2618	16.5214	16.0823	16.5477	15.9417	16.4951	15.9872	16.4401	16.7372	16.1636	16.5676	16.6361	17.2416	16.8714	17.0107	16.8143	16.6969	17.0289
Arhgap27_A2AB59_T464_1	Arhgap27	A2AB59	T464	1	NA	NA	15.553	15.123	15.5258	15.5346	15.4326	15.2261	NA	NA	NA	NA	15.6433	NA	15.399	NA	15.5173	14.7413	15.0845	16.3211	15.6701	NA	NA	NA	NA	14.9813	NA	15.0702	NA	15.5549	NA	15.0851	15.0498	NA	15.1031	15.3407	NA	NA	16.8098	15.3831	14.7258	NA	NA	14.4316	14.6309
Arhgap27_A2AB59_S459_1	Arhgap27	A2AB59	S459	1	15.9015	14.8271	NA	14.0513	15.2671	NA	14.7023	14.6246	14.7625	15.5528	NA	NA	NA	16.443	NA	15.7385	NA	14.6769	14.3941	NA	NA	14.8871	NA	NA	14.6427	14.778	14.9279	NA	NA	NA	NA	NA	NA	NA	NA	NA	13.5064	NA	14.7535	14.0211	NA	NA	14.7601	NA	14.4553
Arhgap27_A2AB59_S462_1	Arhgap27	A2AB59	S462	1	NA	15.2978	NA	NA	NA	NA	NA	NA	NA	NA	15.7684	15.446	NA	15.8617	NA	NA	15.5173	NA	14.3292	14.757	NA	15.4743	15.5777	15.4242	NA	NA	NA	NA	14.4225	15.5549	15.197	NA	NA	NA	NA	15.3864	15.1536	15.557	14.789	NA	14.6137	16.0557	14.9747	NA	NA
Arhgap27_A2AB59_T464_2	Arhgap27	A2AB59	T464	2	NA	NA	14.9447	NA	NA	15.9095	11.7138	NA	NA	NA	15.6153	NA	NA	13.2801	12.0443	12.6487	NA	16.509	15.9032	15.6949	12.8746	15.5626	11.133	NA	13.0737	14.6296	14.6376	11.3896	15.8987	15.0239	13.403	15.3468	15.7322	16.2105	15.8065	NA	NA	11.8468	16.4228	NA	15.5436	13.7431	13.9957	13.6454	12.804
Arhgap27_A2AB59_S462_2	Arhgap27	A2AB59	S462	2	15.5397	14.8991	14.9447	NA	NA	15.9095	NA	NA	NA	NA	15.6153	NA	NA	NA	NA	NA	NA	16.403	15.9032	14.8598	NA	15.5626	NA	NA	15.1387	14.533	NA	NA	15.6859	NA	NA	15.3468	15.7322	16.2105	15.1599	NA	NA	NA	16.4228	NA	15.5436	NA	15.9108	NA	12.804
Arhgap27_A2AB59_S459_2	Arhgap27	A2AB59	S459	2	15.5397	14.8991	NA	NA	15.1615	NA	13.2828	13.4182	14.2462	NA	NA	14.5987	14.007	14.1787	14.466	14.4041	NA	NA	NA	NA	NA	NA	NA	NA	15.1387	NA	10.0004	NA	NA	NA	NA	NA	NA	13.9658	NA	NA	NA	NA	NA	15.5249	NA	14.172	15.9108	13.5515	NA
Arhgap27_A2AB59_S458_2	Arhgap27	A2AB59	S458	2	NA	NA	NA	NA	15.1615	NA	13.2828	13.4182	14.2462	NA	NA	14.5987	14.007	14.1787	14.466	14.4041	NA	NA	NA	NA	NA	NA	NA	NA	NA	NA	10.0004	NA	NA	NA	NA	NA	NA	13.9658	NA	NA	NA	NA	NA	15.5249	NA	14.172	NA	13.5515	NA
Arhgap27_A2AB59_S469_2	Arhgap27	A2AB59	S469	2	NA	NA	NA	NA	NA	NA	11.7138	NA	NA	NA	NA	NA	NA	13.2801	12.0443	12.6487	NA	12.6904	NA	14.5086	12.8746	NA	11.133	NA	13.0737	10.6819	14.6376	11.3896	13.0327	15.0239	13.403	NA	NA	NA	14.3376	NA	NA	11.8468	NA	NA	NA	13.7431	13.9957	13.6454	NA
Arhgap27_A2AB59_S118_1	Arhgap27	A2AB59	S118	1	15.1139	15.0393	14.7694	14.6669	15.3632	15.0288	15.0757	14.855	14.6742	14.825	15.1665	14.5053	15.3853	15.0034	14.6945	15.137	14.7438	14.6669	14.4288	14.4042	14.6437	14.3631	14.2563	14.5465	14.7172	14.4095	14.2737	14.6354	14.1705	14.9452	14.4324	14.6242	14.4723	14.6642	14.5488	14.706	14.7292	15.1225	14.7235	14.7704	14.0774	14.6794	14.8331	14.037	14.5927
Myom3_A2ABU4_S1073_1	Myom3	A2ABU4	S1073	1	21.6873	22.1162	22.3763	22.2274	21.0453	22.6565	22.3305	22.6923	22.6986	22.3169	22.2526	22.0377	22.1034	22.4734	22.5379	22.0682	22.2586	21.9607	22.2907	22.2049	21.6939	21.0895	21.5787	21.5057	21.9249	21.7037	21.9107	21.5271	22.5727	23.085	22.1874	22.1874	22.0768	23.4011	21.9846	22.2054	22.3038	22.0233	22.7547	22.4387	23.0361	22.8348	23.1153	23.0442	22.805
Myom3_A2ABU4_S477_1	Myom3	A2ABU4	S477	1	19.7572	20.0038	19.5714	19.7639	19.4226	19.7565	19.8286	19.7935	19.6975	19.3712	NA	19.9924	19.9268	19.6119	NA	19.4653	20.0296	NA	19.7591	19.9781	20.0031	20.096	20.1027	20.2755	19.4682	19.9377	20.0578	20.2806	19.7376	20.0269	20.0868	20.1806	20.6542	19.9995	20.2427	20.2565	20.4797	19.8299	19.9419	20.0264	20.2146	20.1543	20.4581	20.0206	NA
Myom3_A2ABU4_T478_1	Myom3	A2ABU4	T478	1	NA	NA	NA	NA	NA	NA	NA	NA	NA	NA	19.2801	NA	NA	NA	19.0341	NA	NA	19.7195	NA	NA	NA	NA	NA	NA	NA	NA	NA	NA	NA	NA	NA	NA	NA	NA	NA	NA	NA	NA	NA	NA	NA	NA	NA	NA	19.8504
Myom3_A2ABU4_S486_1	Myom3	A2ABU4	S486	1	15.6262	15.6753	14.9065	15.6183	15.3134	15.1023	15.807	15.9531	15.4253	15.685	15.4598	15.4127	15.5243	15.3413	14.8242	14.7606	15.5631	15.5456	15.2058	15.1859	15.6152	15.5069	15.2284	15.5678	NA	15.3436	15.5499	15.6729	15.266	15.6066	15.1444	15.3226	15.8861	15.8107	15.2229	15.6123	15.6524	15.3252	15.0025	14.8455	15.7461	15.5604	15.3637	15.4537	15.514
Myom3_A2ABU4_S376_1	Myom3	A2ABU4	S376	1	17.6027	17.2415	16.8879	17.2389	17.325	17.5082	17.5474	17.745	17.3924	17.6244	17.4057	17.571	17.4141	17.4829	17.4305	17.2991	17.5341	18.0863	17.3454	17.124	17.3193	17.3138	17.1652	17.2771	17.122	17.1245	17.0397	17.1238	16.8989	16.7109	17.0406	17.0739	17.2532	17.3998	16.4939	16.5315	17.3112	17.1711	16.592	16.5189	16.6438	16.2463	16.8421	16.8651	16.4507
Myom3_A2ABU4_S1307_1	Myom3	A2ABU4	S1307	1	15.4337	15.4393	14.8756	14.9383	14.9801	15.0966	15.4342	14.8961	14.3937	15.111	13.9773	14.1315	13.8147	14.7974	14.4846	13.9362	13.9887	14.9126	15.432	15.2879	15.1153	15.0733	15.1918	15.3442	15.1831	15.2078	15.0777	14.9281	14.93	14.7263	14.3812	14.5826	14.9966	14.9491	14.2448	13.9718	15.1621	14.6097	16.1632	16.0789	16.4895	15.8651	16.0005	16.1505	16.0759
Myom3_A2ABU4_S1051_1	Myom3	A2ABU4	S1051	1	18.0778	17.5529	16.8692	17.4763	17.3874	17.2341	17.5522	17.5525	17.2763	17.2749	16.991	17.6461	17.4839	17.2559	17.0262	17.2367	17.7282	17.8971	17.8766	16.8921	17.4398	17.3034	17.5349	17.5726	17.5908	16.9788	17.5481	17.6845	17.3774	17.5382	17.5015	17.5771	NA	17.7332	17.2863	NA	17.2584	17.0397	16.7916	17.0643	17.2759	17.1406	17.5146	17.3951	17.0555
Myom3_A2ABU4_S1050_1	Myom3	A2ABU4	S1050	1	NA	NA	NA	NA	NA	NA	NA	NA	NA	NA	NA	NA	NA	NA	NA	NA	NA	NA	NA	NA	NA	NA	NA	NA	NA	NA	NA	NA	NA	NA	NA	NA	17.4827	NA	NA	17.1137	NA	NA	NA	NA	NA	NA	NA	NA	NA
Myom3_A2ABU4_T982_1	Myom3	A2ABU4	T982	1	NA	NA	NA	NA	NA	15.4219	NA	NA	NA	NA	NA	NA	NA	NA	NA	NA	NA	NA	NA	13.3001	NA	NA	NA	NA	NA	NA	NA	NA	NA	14.4962	NA	NA	NA	NA	NA	NA	NA	NA	NA	14.6416	15.1586	NA	NA	NA	15.0335
Myom3_A2ABU4_S985_1	Myom3	A2ABU4	S985	1	NA	NA	NA	NA	NA	NA	NA	NA	NA	NA	NA	NA	15.1249	NA	NA	NA	NA	15.2764	NA	NA	NA	NA	NA	NA	14.5655	NA	NA	NA	NA	NA	NA	NA	NA	NA	NA	NA	NA	NA	NA	NA	NA	NA	NA	NA	NA
Myom3_A2ABU4_T989_1	Myom3	A2ABU4	T989	1	NA	NA	NA	NA	NA	NA	NA	NA	NA	13.6038	NA	NA	NA	NA	NA	NA	NA	NA	NA	NA	NA	NA	NA	NA	NA	NA	NA	NA	NA	NA	NA	NA	NA	NA	NA	NA	NA	NA	NA	NA	NA	NA	NA	NA	NA
Myom3_A2ABU4_S983_1	Myom3	A2ABU4	S983	1	15.1311	NA	NA	NA	NA	NA	15.5947	NA	NA	NA	NA	14.1586	NA	NA	NA	NA	NA	NA	14.2875	NA	NA	NA	NA	NA	NA	NA	NA	NA	14.1898	NA	NA	NA	14.5745	NA	NA	NA	NA	NA	NA	NA	NA	NA	NA	NA	14.9779
Myom3_A2ABU4_T91_1	Myom3	A2ABU4	T91	1	NA	NA	NA	NA	NA	NA	NA	NA	NA	NA	NA	NA	NA	NA	NA	NA	NA	NA	NA	NA	12.1241	NA	NA	NA	NA	NA	NA	NA	NA	NA	NA	NA	NA	NA	NA	NA	NA	NA	NA	12.0317	13.1859	NA	11.4253	NA	NA
Myom3_A2ABU4_T90_1	Myom3	A2ABU4	T90	1	15.8781	16.2116	15.1387	NA	15.8416	16.356	15.8249	NA	15.4193	16.2946	16.4947	16.1155	NA	14.0617	15.7408	NA	16.1604	16.3252	15.9113	15.7275	NA	NA	15.8372	16.336	16.4363	16.1851	NA	15.6472	16.0527	16.2266	15.2735	15.7064	15.8765	16.6559	NA	NA	16.4686	NA	15.2375	14.5918	15.87	15.5746	NA	16.0029	15.8871
Myom3_A2ABU4_S265_1	Myom3	A2ABU4	S265	1	14.4806	14.2075	13.6935	NA	NA	14.0646	NA	NA	NA	NA	NA	NA	NA	NA	NA	NA	NA	13.856	13.3776	13.3872	NA	13.8671	NA	NA	13.5227	13.757	NA	NA	NA	13.3623	NA	NA	NA	NA	NA	13.2251	NA	NA	NA	13.2305	13.7563	13.4755	NA	NA	NA
Myom3_A2ABU4_S275_1	Myom3	A2ABU4	S275	1	NA	NA	NA	13.8616	12.4074	NA	13.5554	13.7013	13.5132	12.3597	13.1523	12.3544	11.507	12.1274	13.2356	12.9915	10.2285	13.7011	13.3828	NA	13.1108	NA	13.0573	12.928	NA	NA	13.0645	13.5617	13.0041	NA	11.6647	12.6249	12.9598	11.4211	12.0819	NA	13.1486	12.9324	12.5045	NA	13.3122	NA	13.7085	13.5159	12.8879
Myom3_A2ABU4_S1079_1	Myom3	A2ABU4	S1079	1	NA	17.4596	16.9348	16.6329	NA	NA	13.5874	NA	NA	16.5743	NA	NA	NA	16.6772	NA	15.9907	NA	16.794	NA	16.2714	16.2794	16.4259	NA	11.5738	NA	NA	NA	17.4612	11.5187	16.7743	16.931	17.2782	13.3638	18.1754	16.4749	15.3709	15.7285	16.02	16.6555	16.6385	17.2386	12.6034	17.5241	12.9272	12.9935
Myom3_A2ABU4_T1081_1	Myom3	A2ABU4	T1081	1	NA	NA	NA	NA	NA	NA	NA	NA	NA	NA	NA	NA	NA	NA	NA	NA	NA	NA	10.118	NA	NA	NA	NA	NA	NA	NA	NA	NA	NA	NA	NA	NA	NA	NA	NA	NA	NA	NA	NA	NA	NA	NA	NA	NA	NA
Myom3_A2ABU4_S1079_2	Myom3	A2ABU4	S1079	2	12.9493	NA	13.6249	14.7081	NA	13.8021	13.7346	13.5818	13.6829	13.0553	14.2802	9.93339	NA	13.4054	NA	13.6341	8.69226	13.5975	13.897	13.6851	12.7379	13.7973	11.1582	10.5537	12.6044	13.0164	12.5174	12.3192	NA	13.4409	12.6892	13.3738	12.7555	12.5536	11.59	10.8367	13.0753	13.0712	13.8107	14.7161	14.4348	14.1618	14.8667	14.7543	14.1605
Myom3_A2ABU4_T1081_2	Myom3	A2ABU4	T1081	2	NA	NA	NA	14.2162	NA	NA	NA	NA	NA	NA	13.3665	11.0681	NA	NA	NA	13.1873	11.4023	NA	13.5384	13.7841	NA	13.987	NA	11.3362	NA	11.4869	NA	NA	NA	13.5075	11.472	NA	NA	NA	NA	NA	NA	12.8047	NA	13.0812	NA	NA	NA	NA	NA
Myom3_A2ABU4_S1073_2	Myom3	A2ABU4	S1073	2	12.9493	NA	13.6249	12.9168	NA	13.8021	13.7346	13.5818	13.6829	13.0553	13.9918	11.8882	NA	13.4054	NA	12.9727	8.69226	13.5975	13.4831	12.1562	12.7379	12.5671	11.6918	12.4732	12.6044	12.4029	12.5174	12.3192	NA	13.5866	13.0254	13.3738	12.7555	12.5536	11.59	10.8367	13.0753	12.2478	13.8107	14.1555	14.4348	14.1618	14.8667	14.7543	14.1605
Myom3_A2ABU4_Y1080_1	Myom3	A2ABU4	Y1080	1	NA	NA	NA	NA	NA	NA	NA	NA	NA	NA	NA	NA	NA	NA	NA	NA	NA	NA	NA	NA	NA	NA	NA	NA	NA	NA	NA	NA	NA	NA	NA	NA	NA	NA	NA	NA	NA	NA	NA	NA	NA	NA	NA	NA	NA
Myom3_A2ABU4_S259_1	Myom3	A2ABU4	S259	1	15.7809	15.712	15.0811	15.1321	15.7588	15.306	15.4545	15.2731	14.5323	14.4363	14.6996	13.7434	12.99	12.7279	14.3503	14.0998	12.6207	15.0816	15.114	15.0448	14.6994	14.7583	14.6718	15.3958	15.1506	15.0227	14.7887	14.6621	14.5694	12.6086	13.1162	14.1272	14.1656	13.1535	13.5784	14.3729	14.1376	12.1233	14.7221	15.0559	15.1223	14.7482	15.2395	15.0758	14.983
Myom3_A2ABU4_S39_1	Myom3	A2ABU4	S39	1	19.1095	18.223	18.0337	18.6162	19.5606	19.3188	19.3631	19.53	18.1837	18.4967	18.3448	18.5961	19.0841	19.0864	18.1862	17.8407	18.7263	18.5485	18.0276	17.6849	17.4842	18.0906	17.5083	18.4282	18.215	18.6441	18.1091	18.4494	17.7248	18.0417	17.4933	17.4234	18.2451	17.6028	17.479	18.6001	18.437	18.5646	18.5325	18.5851	18.7347	18.1482	19.0259	19.0662	18.2456
Myom3_A2ABU4_S45_1	Myom3	A2ABU4	S45	1	14.9821	14.7525	13.8714	14.5072	13.8201	15.6514	14.6765	15.2537	14.1829	15.0337	16.4398	12.7341	15.2953	15.7165	16.0041	12.7612	14.9032	13.988	13.7976	13.6736	13.5763	12.4235	14.5515	15.9254	14.028	15.3817	14.9045	13.8763	15.7217	16.3464	15.4029	15.8519	15.4468	15.8166	14.3104	12.6008	14.5651	15.102	14.4017	14.3084	14.0204	13.6642	13.7229	13.9619	11.8503
Myom3_A2ABU4_S44_1	Myom3	A2ABU4	S44	1	NA	NA	NA	NA	NA	NA	NA	NA	NA	NA	14.7083	10.5317	12.4141	NA	NA	15.0891	NA	NA	NA	NA	NA	NA	NA	NA	NA	NA	NA	NA	NA	NA	NA	NA	NA	NA	NA	NA	NA	15.1264	NA	NA	NA	NA	NA	NA	NA
Myom3_A2ABU4_S45_2	Myom3	A2ABU4	S45	2	NA	12.1818	NA	NA	NA	9.92168	NA	9.87142	NA	NA	NA	12.9731	NA	NA	NA	NA	NA	NA	12.7554	13.3418	13.5774	13.4295	NA	13.3783	12.1433	NA	12.9105	8.33453	NA	13.74	13.7202	13.1423	13.0956	NA	NA	NA	13.6022	13.4659	NA	NA	12.6462	NA	NA	12.5025	13.3432
Myom3_A2ABU4_S44_2	Myom3	A2ABU4	S44	2	NA	12.1818	NA	NA	NA	9.92168	NA	9.87142	NA	NA	NA	12.9731	NA	NA	NA	NA	NA	NA	12.7554	13.3418	13.5774	13.4295	NA	13.3783	12.1433	NA	12.9105	8.33453	NA	13.74	13.7202	13.1423	13.0956	NA	NA	NA	13.6022	13.4659	NA	NA	12.6462	NA	NA	12.5025	13.3432
Myom3_A2ABU4_T89_1	Myom3	A2ABU4	T89	1	NA	NA	NA	NA	NA	NA	NA	NA	NA	NA	NA	NA	NA	NA	NA	NA	NA	NA	NA	NA	NA	NA	NA	12.7665	NA	NA	NA	NA	NA	NA	NA	NA	NA	NA	NA	NA	NA	NA	NA	NA	NA	NA	NA	NA	NA
Myom3_A2ABU4_S9_2	Myom3	A2ABU4	S9	2	20.5394	17.7273	17.9195	18.1734	18.1896	17.809	18.7593	19.9348	19.9314	19.9476	18.6876	21.088	20.156	19.8891	23.0405	18.3022	20.5761	19.7422	20.6386	20.6029	18.0604	19.6446	19.5828	18.6899	20.5262	17.8034	20.4928	18.3246	20.1108	21.3863	18.1359	20.8905	22.7629	20.7479	20.7865	20.839	22.6931	21.5871	18.8374	22.9281	18.1446	20.7673	22.8094	20.8506	19.7058
Myom3_A2ABU4_S6_2	Myom3	A2ABU4	S6	2	21.2745	20.1484	19.8034	19.7218	19.8754	19.9364	19.7941	20.4438	20.6935	20.7582	20.2744	21.2949	21.517	20.6242	23.1536	19.8545	21.2395	20.5984	21.2023	21.1249	19.8671	20.2398	19.934	20.3578	21.0201	19.655	20.8471	19.9084	20.0301	21.4441	20.3989	21.8128	22.9371	21.406	21.424	21.298	22.8607	21.622	20.6274	23.0505	20.2887	21.2963	22.9693	21.3454	20.2501
Myom3_A2ABU4_T2_2	Myom3	A2ABU4	T2	2	19.9498	19.8503	19.3475	19.1182	19.3383	19.5614	18.8281	18.6937	19.4083	19.5402	19.8931	20.4937	20.8055	19.2995	19.425	19.2529	20.0172	20.1745	19.5738	19.405	19.3814	20.3261	20.2162	19.8126	19.2338	19.1869	18.648	19.3228	20.6271	20.3933	20.0619	20.7306	19.8013	19.957	19.9387	19.4225	19.6721	20.6211	20.1349	19.4296	19.9187	19.5927	19.7163	19.5611	18.5801
Myom3_A2ABU4_T2_1	Myom3	A2ABU4	T2	1	NA	NA	NA	NA	NA	NA	NA	NA	NA	NA	NA	NA	NA	NA	NA	NA	NA	15.2299	NA	NA	NA	NA	NA	NA	NA	NA	NA	NA	NA	NA	NA	NA	NA	NA	NA	NA	NA	NA	NA	13.8725	14.5007	NA	NA	NA	NA
Myom3_A2ABU4_T18_1	Myom3	A2ABU4	T18	1	15.9881	NA	15.2405	NA	NA	NA	NA	NA	15.502	14.4859	NA	NA	NA	15.0452	13.9447	NA	NA	NA	NA	NA	NA	NA	14.99	14.7604	NA	NA	17.6069	NA	NA	13.2022	NA	NA	NA	14.0658	NA	NA	14.6629	NA	NA	11.9273	NA	NA	NA	NA	NA
Myom3_A2ABU4_S6_1	Myom3	A2ABU4	S6	1	22.9206	22.7705	22.3923	22.5005	22.6106	22.9028	22.6143	22.9685	22.5937	22.8006	22.5503	22.8422	22.8502	22.5506	22.6354	22.4633	22.9761	23.3673	22.9825	22.9248	23.0678	23.123	22.81	23.0998	22.9228	23.0217	22.7599	22.9076	22.6773	22.793	23.1176	22.7943	22.9938	23.0102	22.732	22.8602	23.0403	22.4983	23.0659	22.5049	22.55	22.0426	22.6654	22.7226	22.3137
Myom3_A2ABU4_S9_1	Myom3	A2ABU4	S9	1	18.8078	18.9944	NA	19.3617	18.8083	18.8932	14.5083	19.2273	19.4068	19.2779	18.8995	15.1118	19.0179	19.3269	17.7152	17.8428	15.1485	19.6395	18.7661	NA	17.6509	18.6443	19.4186	19.5785	19.2285	NA	17.5389	19.4423	19.316	19.6942	14.4962	18.9839	19.1832	19.5586	18.7878	18.9217	19.1033	17.5765	19.0562	18.2667	19.2491	17.7384	19.4595	18.0095	17.668
Myom3_A2ABU4_S16_1	Myom3	A2ABU4	S16	1	NA	NA	NA	NA	NA	NA	NA	NA	NA	NA	NA	NA	NA	NA	NA	NA	NA	NA	NA	NA	NA	NA	NA	NA	NA	NA	NA	NA	NA	NA	NA	NA	NA	NA	NA	NA	NA	NA	NA	NA	NA	NA	NA	NA	NA
Myom3_A2ABU4_S9_3	Myom3	A2ABU4	S9	3	15.4527	16.0911	NA	NA	NA	NA	NA	NA	NA	14.7147	NA	14.8069	15.7083	NA	NA	14.9221	14.5318	15.8176	14.4936	NA	15.4329	NA	NA	NA	NA	NA	NA	15.2638	NA	NA	14.7908	15.1577	14.9428	NA	NA	NA	NA	14.6908	16.0131	NA	NA	NA	NA	NA	NA
Myom3_A2ABU4_S6_3	Myom3	A2ABU4	S6	3	15.4527	16.0911	NA	NA	NA	NA	NA	NA	NA	14.7147	NA	14.8069	15.7083	NA	NA	14.9221	14.5318	15.8176	14.4936	NA	15.4329	NA	NA	NA	NA	NA	NA	15.2638	NA	NA	14.7908	15.1577	14.9428	NA	NA	NA	NA	14.6908	16.0131	NA	NA	NA	NA	NA	NA
Myom3_A2ABU4_T2_3	Myom3	A2ABU4	T2	3	15.4527	16.4676	14.0971	NA	14.0515	NA	13.4941	NA	NA	14.7147	NA	14.8069	16.0537	13.4986	NA	14.9221	14.5318	15.8176	15.0543	14.0168	15.4329	13.8904	13.0141	13.4361	13.4146	NA	NA	15.2638	13.1258	13.9494	14.7908	15.1577	14.9428	NA	12.8744	12.1175	13.9199	14.6908	16.5064	13.7631	14.4546	13.1449	13.517	13.8341	NA
Myom3_A2ABU4_T18_3	Myom3	A2ABU4	T18	3	NA	14.3453	14.0971	NA	14.0515	NA	13.4941	NA	NA	NA	NA	NA	13.8223	13.4986	NA	NA	NA	NA	13.4196	14.0168	NA	13.8904	13.0141	13.4361	13.4146	NA	NA	NA	13.1258	13.9494	NA	NA	NA	NA	12.8744	12.1175	13.9199	NA	14.7183	13.7631	14.4546	13.1449	13.517	13.8341	NA
Myom3_A2ABU4_S16_3	Myom3	A2ABU4	S16	3	NA	14.3453	14.0971	NA	14.0515	NA	13.4941	NA	NA	NA	NA	NA	13.8223	13.4986	NA	NA	NA	NA	13.4196	14.0168	NA	13.8904	13.0141	13.4361	13.4146	NA	NA	NA	13.1258	13.9494	NA	NA	NA	NA	12.8744	12.1175	13.9199	NA	14.7183	13.7631	14.4546	13.1449	13.517	13.8341	NA
Myom3_A2ABU4_S511_1	Myom3	A2ABU4	S511	1	NA	NA	NA	NA	NA	NA	NA	14.3155	13.4066	NA	NA	NA	13.7727	NA	NA	NA	13.8641	NA	NA	NA	NA	14.0214	14.4043	NA	NA	NA	14.5543	NA	NA	NA	NA	NA	NA	12.1457	NA	NA	NA	NA	NA	NA	NA	14.8387	NA	15.022	14.7138
Myom3_A2ABU4_T291_1	Myom3	A2ABU4	T291	1	NA	NA	NA	12.0047	NA	NA	12.5518	12.5952	NA	NA	NA	NA	NA	NA	NA	NA	NA	NA	NA	NA	NA	NA	NA	NA	NA	NA	NA	NA	NA	NA	NA	NA	NA	NA	NA	NA	NA	NA	NA	NA	NA	NA	NA	NA	NA
Myom3_A2ABU4_S350_1	Myom3	A2ABU4	S350	1	18.1155	18.0312	17.4985	17.6276	17.7291	17.9947	18.045	18.0218	17.4316	17.843	17.1227	17.4757	17.0806	17.6325	17.3008	16.9971	16.3436	18.0056	17.7242	17.6585	17.6655	15.7399	17.6498	17.6373	17.6864	17.1616	17.7358	17.5311	17.1883	17.6951	17.1669	17.3974	17.2177	17.6354	16.8787	17.1451	17.3748	17.1507	16.9875	17.3643	17.607	15.4465	17.5968	17.4863	17.213
Myom3_A2ABU4_S349_1	Myom3	A2ABU4	S349	1	NA	NA	NA	NA	NA	NA	NA	NA	NA	NA	NA	NA	NA	NA	NA	NA	15.411	NA	NA	NA	NA	NA	NA	NA	NA	15.9386	NA	NA	NA	NA	NA	NA	NA	NA	NA	NA	NA	NA	NA	NA	NA	NA	NA	NA	NA
Myom3_A2ABU4_S679_1	Myom3	A2ABU4	S679	1	16.8737	17.5635	17.6319	17.369	17.0156	17.9584	17.7436	17.9901	17.7933	18.0659	18.1702	17.9822	18.1893	17.7315	17.5939	17.8386	18.0431	17.4942	16.826	17.3387	17.8774	17.4939	17.7977	18.0845	16.9528	17.6694	17.6156	18.0739	17.6056	17.6757	17.6688	17.5364	17.4909	17.6864	17.1497	17.1785	17.6923	17.4312	17.0867	16.7525	17.9752	17.7757	16.7609	17.8707	17.7735
Med14_A2ABV5_S1147_3	Med14	A2ABV5	S1147	3	16.7386	NA	NA	NA	NA	NA	NA	15.8195	NA	NA	NA	NA	NA	NA	NA	16.7489	NA	16.167	16.4287	16.5515	NA	NA	16.794	NA	16.446	NA	NA	15.0867	15.9456	NA	NA	15.7458	NA	NA	NA	NA	NA	NA	NA	NA	NA	NA	NA	NA	NA
Med14_A2ABV5_S1141_3	Med14	A2ABV5	S1141	3	16.7386	NA	NA	NA	NA	NA	NA	15.8195	NA	NA	NA	NA	NA	NA	NA	16.7489	NA	16.167	16.4287	16.5515	NA	NA	16.794	NA	16.446	NA	NA	15.0867	15.9456	NA	NA	15.7458	NA	NA	NA	NA	NA	NA	NA	NA	NA	NA	NA	NA	NA
Med14_A2ABV5_S1133_3	Med14	A2ABV5	S1133	3	16.7386	NA	NA	NA	NA	NA	NA	15.8195	NA	NA	NA	NA	NA	NA	NA	16.7489	NA	16.167	16.4287	16.5515	NA	NA	16.794	NA	16.446	NA	NA	15.0867	15.9456	NA	NA	15.7458	NA	NA	NA	NA	NA	NA	NA	NA	NA	NA	NA	NA	NA
Med14_A2ABV5_S1138_2	Med14	A2ABV5	S1138	2	NA	NA	NA	NA	NA	NA	11.9615	NA	NA	NA	NA	NA	NA	NA	NA	NA	NA	NA	NA	NA	NA	NA	NA	NA	NA	NA	NA	NA	NA	NA	NA	NA	NA	NA	NA	NA	11.2877	NA	NA	NA	13.3247	NA	NA	NA	NA
Med14_A2ABV5_S1133_2	Med14	A2ABV5	S1133	2	NA	NA	NA	NA	NA	NA	11.9615	NA	NA	NA	NA	NA	NA	NA	NA	NA	NA	NA	NA	NA	NA	NA	NA	NA	NA	NA	NA	NA	NA	NA	NA	NA	NA	NA	NA	NA	11.2877	NA	NA	NA	13.3247	NA	NA	NA	NA
Med14_A2ABV5_S1149_2	Med14	A2ABV5	S1149	2	NA	NA	NA	NA	NA	15.3516	NA	NA	NA	NA	NA	15.5644	NA	NA	NA	NA	NA	NA	NA	NA	NA	NA	NA	16.0918	17.5692	NA	NA	NA	NA	15.7771	NA	NA	16.2764	NA	15.1014	NA	NA	NA	17.9908	NA	NA	NA	NA	NA	13.5495
Med14_A2ABV5_S1141_2	Med14	A2ABV5	S1141	2	NA	NA	NA	NA	NA	15.3516	NA	NA	NA	NA	NA	15.5644	NA	NA	NA	NA	NA	NA	NA	NA	NA	NA	NA	16.0918	17.5692	NA	NA	NA	NA	15.7771	NA	NA	16.2764	NA	15.1014	NA	NA	NA	17.9908	NA	NA	NA	NA	NA	13.5495
Med14_A2ABV5_S1004_1	Med14	A2ABV5	S1004	1	13.5937	13.3471	13.6681	13.9381	13.0784	13.6088	13.6966	13.7055	12.9544	12.742	11.8712	10.8163	11.7466	12.7251	12.8932	12.1363	11.9462	11.9814	12.1252	12.5027	NA	11.2026	NA	NA	NA	11.9658	11.6865	11.3366	12.0373	12.0284	13.0196	12.9748	12.2519	11.5276	12.6532	12.5274	12.3971	12.7936	NA	NA	12.2956	12.9017	NA	12.8967	13.3911
Dock11_A2AF47_S797_1	Dock11	A2AF47	S797	1	15.5972	15.3348	15.8716	15.822	16.118	15.9017	15.661	15.7618	15.5155	15.0475	15.6534	15.2283	15.3367	16.0496	15.6198	15.8228	14.8736	15.2067	15.6461	15.3808	15.9598	15.3283	15.5512	15.3087	15.3372	15.3866	15.0987	15.2161	14.9158	16.0289	15.5327	15.8123	14.9382	15.2879	15.1484	15.4989	15.268	15.684	15.2423	14.4904	14.694	14.9248	14.527	14.6379	14.3548
Dock11_A2AF47_S158_1	Dock11	A2AF47	S158	1	NA	NA	NA	13.2234	NA	NA	NA	NA	12.7468	12.9818	12.8864	NA	NA	NA	12.9172	NA	NA	NA	NA	NA	12.6697	NA	NA	12.8193	NA	13.593	NA	13.078	NA	13.3008	NA	NA	NA	13.6248	12.3973	NA	12.9723	NA	NA	NA	13.0269	NA	12.1804	12.9329	NA
Map7d2_A2AG50_S751_1	Map7d2	A2AG50	S751	1	NA	13.6428	14.6963	14.2435	NA	NA	NA	13.307	NA	NA	NA	NA	NA	NA	NA	NA	NA	NA	14.4521	13.9004	14.9076	13.2273	NA	13.314	14.4812	NA	12.5896	NA	NA	NA	NA	15.7538	NA	10.7648	NA	13.7401	11.5231	NA	NA	NA	NA	14.2575	NA	NA	13.6062
Map7d2_A2AG50_S699_1	Map7d2	A2AG50	S699	1	NA	14.2419	NA	14.1063	NA	NA	NA	13.5201	NA	13.5592	NA	12.465	NA	NA	13.7034	NA	NA	NA	NA	14.2207	NA	NA	13.1113	13.5276	NA	NA	NA	NA	NA	12.458	NA	NA	NA	NA	NA	14.5253	13.6645	NA	NA	NA	NA	13.7338	NA	NA	NA
Bclaf3_A2AG58_S80_2	Bclaf3	A2AG58	S80	2	15.0162	14.9746	14.4869	15.0733	14.9704	14.6256	14.4985	15.2086	15.1617	15.2691	15.459	15.425	15.4533	15.1156	15.3688	15.4831	15.2003	15.1361	14.9557	14.9517	14.476	14.8389	15.2773	15.1049	14.676	14.862	14.9657	15.2178	15.2999	15.1171	15.2041	14.8214	14.8009	14.8166	15.2946	14.7839	14.7495	15.1449	15.0422	14.462	14.6497	14.9006	14.5792	15.0618	14.9058
Bclaf3_A2AG58_S78_2	Bclaf3	A2AG58	S78	2	15.0162	14.9746	14.4869	15.0733	14.9704	14.6256	14.4985	15.2086	15.1617	15.2691	15.459	15.425	15.4533	15.1156	15.3688	15.4831	15.2003	15.1361	14.9557	14.9517	14.476	14.8389	15.2773	15.1049	14.676	14.862	14.9657	15.2178	15.2999	15.1171	15.2041	14.8214	14.8009	14.8166	15.2946	14.7839	14.7495	15.1449	15.0422	14.462	14.6497	14.9006	14.5792	15.0618	14.9058
Bclaf3_A2AG58_Y74_2	Bclaf3	A2AG58	Y74	2	NA	NA	NA	NA	NA	NA	NA	NA	NA	NA	NA	NA	NA	NA	NA	NA	NA	NA	NA	NA	NA	NA	NA	NA	NA	NA	NA	NA	NA	NA	NA	NA	NA	NA	NA	NA	NA	NA	NA	NA	NA	NA	NA	NA	NA
Bclaf3_A2AG58_S73_2	Bclaf3	A2AG58	S73	2	NA	NA	NA	NA	NA	NA	NA	NA	NA	NA	NA	NA	NA	NA	NA	NA	NA	NA	NA	NA	NA	NA	NA	NA	NA	NA	NA	NA	NA	NA	NA	NA	NA	NA	NA	NA	NA	NA	NA	NA	NA	NA	NA	NA	NA
Bclaf3_A2AG58_Y202_1	Bclaf3	A2AG58	Y202	1	NA	NA	NA	NA	NA	NA	NA	NA	NA	NA	NA	NA	NA	NA	12.6938	NA	NA	NA	NA	NA	NA	NA	NA	NA	NA	NA	NA	NA	NA	13.7778	NA	NA	NA	NA	NA	13.7184	NA	NA	NA	NA	NA	NA	NA	NA	NA
Bclaf3_A2AG58_S205_1	Bclaf3	A2AG58	S205	1	NA	14.6497	15.6098	14.0899	14.6555	15.2248	12.2279	NA	NA	14.6365	14.4861	NA	15.0495	14.5832	NA	15.1863	15.0038	13.5496	14.9192	NA	13.652	NA	15.0439	14.5036	14.7063	14.1396	NA	NA	14.8957	NA	14.6523	14.7332	NA	15.1578	NA	NA	12.1752	14.9554	14.6446	14.6023	13.9408	14.8893	13.9392	14.0642	NA
Med12_A2AGH6_S699_1	Med12	A2AGH6	S699	1	15.5806	15.6118	15.6933	16.2355	14.887	15.1129	15.3712	16.0796	15.8726	15.6811	15.5985	15.6347	15.963	15.475	15.975	15.824	16.1104	14.9204	15.3494	15.9008	16.2653	16.2442	16.4091	16.3475	15.9994	15.7166	16.2632	16.2495	15.7357	16.4052	15.1413	15.1253	15.2634	15.5724	15.3422	15.4209	15.7658	15.6025	15.2848	14.8732	15.0105	14.8211	15.1764	14.8819	15.6136
Med12_A2AGH6_S701_2	Med12	A2AGH6	S701	2	13.6825	13.5338	NA	14.0112	13.5889	NA	13.3739	NA	13.6192	15.648	15.2951	13.8281	14.3239	15.3801	11.3723	15.0165	15.0164	13.9379	14.2572	11.3076	12.004	13.9198	14.6083	13.7386	13.6839	NA	13.112	13.7424	12.7772	NA	NA	14.4836	11.3558	14.8851	NA	12.6722	12.3628	15.3585	13.8202	NA	NA	14.605	6.83287	12.9591	13.8723
Med12_A2AGH6_S699_2	Med12	A2AGH6	S699	2	13.6825	13.5338	NA	14.0112	13.5889	NA	13.3739	NA	13.6192	15.648	15.2951	13.8281	14.3239	15.3801	11.3723	15.0165	15.0164	13.9379	14.2572	11.3076	12.004	13.9198	14.6083	13.7386	13.6839	NA	13.112	13.7424	12.7772	NA	NA	14.4836	11.3558	14.8851	NA	12.6722	12.3628	15.3585	13.8202	NA	NA	14.605	6.83287	12.9591	13.8723
Camsap1_A2AHC3_S560_1	Camsap1	A2AHC3	S560	1	17.8159	NA	NA	NA	17.7987	NA	NA	NA	NA	NA	NA	NA	NA	17.4533	NA	NA	NA	NA	NA	NA	17.2045	NA	NA	NA	NA	17.1226	NA	NA	NA	NA	NA	18.0928	NA	17.9253	17.9803	17.8716	NA	NA	17.8213	NA	NA	NA	17.9848	17.6758	NA
Camsap1_A2AHC3_T559_1	Camsap1	A2AHC3	T559	1	12.7367	17.9686	17.6073	16.7887	12.7956	17.8686	16.2519	16.9839	17.3662	17.883	17.8649	17.901	17.9449	12.9127	17.6875	17.7361	18.1637	18.0233	17.0829	17.527	12.408	17.7521	18.0738	18.0222	16.6764	12.338	17.5052	17.6793	18.0769	17.5003	17.9775	12.4543	18.201	12.6726	NA	12.8197	17.9848	17.8246	12.0393	17.5382	17.7179	17.7154	11.5954	11.688	18.0381
Camsap1_A2AHC3_S1133_1	Camsap1	A2AHC3	S1133	1	17.4286	17.2479	17.5723	17.5918	17.2252	17.4016	17.2474	17.3012	17.5114	17.3168	17.4128	17.3654	17.4638	17.3117	17.3659	17.4877	17.6684	17.4642	17.4426	17.5668	17.4581	17.6135	17.5961	17.5224	17.365	17.1828	17.1149	17.8316	17.5416	17.5386	17.33	17.3231	17.1897	17.6994	17.2314	17.3054	17.1328	17.0962	17.8088	17.2964	17.4485	17.3583	17.2955	17.4736	17.4868
Camsap1_A2AHC3_S469_1	Camsap1	A2AHC3	S469	1	NA	15.642	16.0655	15.7898	15.7709	16.1069	15.648	16.1643	15.7933	15.7629	16.0724	15.7799	15.6443	15.9127	15.8706	15.9001	NA	15.3903	15.7055	15.6159	15.9232	15.6114	15.6313	NA	15.4797	15.8636	15.4489	15.8264	16.2953	15.3759	16.1822	15.4421	15.8874	15.7556	15.7871	16.1639	15.6755	15.8066	16.2145	16.5274	15.6467	15.8774	15.654	15.9474	15.8126
Camsap1_A2AHC3_S473_1	Camsap1	A2AHC3	S473	1	15.525	NA	NA	NA	NA	NA	NA	16.2018	NA	NA	NA	NA	NA	NA	NA	NA	NA	NA	NA	NA	NA	NA	NA	NA	NA	NA	NA	NA	NA	NA	NA	NA	16.2249	NA	NA	NA	NA	NA	NA	NA	NA	NA	NA	NA	NA
Camsap1_A2AHC3_T472_1	Camsap1	A2AHC3	T472	1	NA	NA	NA	NA	NA	NA	NA	NA	NA	NA	15.758	NA	NA	15.3669	NA	NA	NA	NA	NA	NA	NA	NA	NA	NA	NA	NA	NA	15.3356	NA	NA	NA	NA	NA	NA	NA	NA	NA	NA	NA	NA	NA	NA	NA	NA	15.2328
Camsap1_A2AHC3_S481_1	Camsap1	A2AHC3	S481	1	NA	NA	NA	NA	NA	NA	NA	NA	NA	NA	NA	NA	NA	NA	NA	NA	NA	NA	NA	NA	NA	NA	NA	NA	NA	NA	NA	NA	NA	NA	NA	NA	NA	NA	NA	NA	NA	NA	NA	NA	NA	NA	NA	NA	NA
Camsap1_A2AHC3_S823_1	Camsap1	A2AHC3	S823	1	NA	15.1806	14.9729	14.9125	15.3159	NA	15.2285	14.9616	14.1097	15.0747	15.3816	NA	15.8088	NA	15.1717	15.4509	15.5328	15.3019	NA	NA	15.1885	15.3222	13.6757	15.0599	15.1339	15.1798	15.6057	15.2269	14.605	NA	15.1791	15.3451	15.1232	15.4781	15.7031	NA	15.1528	15.1044	NA	14.7096	15.1114	14.797	NA	15.0442	15.3681
Camsap1_A2AHC3_S1407_1	Camsap1	A2AHC3	S1407	1	14.1612	14.4923	13.9467	14.9598	14.068	14.0774	14.4647	14.5186	14.1335	15.0226	14.3868	14.733	13.9039	13.9857	14.413	13.936	14.4124	14.5865	14.893	14.9201	15.163	14.8698	14.4247	14.62	14.4843	14.5511	14.9141	14.75	14.9138	14.8713	14.8663	14.894	14.865	14.7891	14.6443	14.1502	14.8712	14.5763	14.3268	14.153	13.372	13.6365	14.1077	13.3939	13.1445
Camsap1_A2AHC3_S553_1	Camsap1	A2AHC3	S553	1	19.4006	19.3703	19.182	19.2592	19.338	19.2423	19.0098	19.542	19.3424	19.3045	19.4119	19.5373	19.5171	19.3397	19.2942	19.3025	19.5905	19.7354	19.4409	19.5528	19.4242	19.3382	19.4413	19.4674	19.3174	19.4911	19.2114	19.6444	19.5542	19.5145	19.5072	19.543	19.5418	19.4737	19.3794	19.3815	19.3938	19.2825	19.3867	19.2544	19.0701	18.8621	19.2549	19.3246	19.1866
Camsap1_A2AHC3_S553_2	Camsap1	A2AHC3	S553	2	16.0977	NA	14.5277	13.7824	14.6179	23.0061	NA	13.9724	15.7856	22.2121	16.7411	NA	13.6711	13.9113	19.2969	13.3902	NA	20.8262	NA	18.3614	20.2522	15.0698	NA	14.7788	15.5297	15.3791	14.0117	13.8751	NA	14.0526	NA	NA	15.1921	14.4375	15.3168	14.5987	15.4721	15.052	17.5078	17.9745	15.8374	15.0258	NA	19.3468	13.8217
Camsap1_A2AHC3_S550_2	Camsap1	A2AHC3	S550	2	16.0977	NA	14.5277	13.7824	14.6179	23.0061	NA	13.9724	15.7856	22.2121	16.7411	NA	13.6711	13.9113	19.2969	13.3902	NA	20.8262	NA	18.3614	20.2522	15.0698	NA	14.7788	15.5297	15.3791	14.0117	13.8751	NA	14.0526	NA	NA	15.1921	14.4375	15.3168	14.5987	15.4721	15.052	17.5078	17.9745	15.8374	15.0258	NA	19.3468	13.8217
Camsap1_A2AHC3_S1353_1	Camsap1	A2AHC3	S1353	1	13.5842	13.3419	12.7436	13.3147	12.91	13.6092	12.9326	13.2136	13.5071	12.8333	13.2785	13.2595	13.3574	13.3376	13.0742	13.0023	13.0199	13.1977	13.5843	13.6153	13.5486	13.346	13.1695	13.4046	13.7509	13.3436	13.6097	13.3899	13.3148	13.6737	13.3376	13.5824	12.5432	13.0031	13.2124	13.0341	12.62	12.9925	12.6253	12.1702	13.0104	12.6354	11.8637	12.3084	12.7605
Camsap1_A2AHC3_Y1360_1	Camsap1	A2AHC3	Y1360	1	NA	NA	NA	NA	NA	8.10861	NA	9.77302	9.66337	NA	11.2092	9.13334	8.83874	9.55904	9.30018	10.2329	10.8189	NA	10.2526	NA	NA	NA	NA	NA	NA	NA	NA	NA	NA	NA	NA	NA	NA	NA	NA	NA	NA	NA	NA	NA	NA	NA	NA	NA	NA
Virma_A2AIV2_S1577_1	Virma	A2AIV2	S1577	1	NA	NA	NA	NA	NA	NA	NA	NA	NA	NA	NA	NA	NA	NA	NA	NA	NA	NA	NA	NA	NA	16.2952	NA	16.3897	NA	NA	NA	16.2109	NA	16.3681	NA	NA	NA	16.4249	NA	NA	NA	NA	NA	NA	NA	NA	NA	NA	16.3943
Virma_A2AIV2_S1578_1	Virma	A2AIV2	S1578	1	16.1769	16.2382	16.301	NA	16.1088	16.3021	16.1273	16.1316	16.2487	16.3257	16.2488	16.2395	16.1879	16.1859	16.3002	16.2595	16.1884	16.3855	16.4993	16.558	16.599	NA	16.5552	16.3246	16.5561	16.5072	16.3358	NA	NA	NA	16.377	16.384	16.4629	NA	16.3159	16.5396	16.4444	16.4001	16.7182	16.3916	16.0113	16.0279	16.4739	16.1675	NA
Virma_A2AIV2_S173_1	Virma	A2AIV2	S173	1	17.1821	17.2481	17.5389	17.8204	17.1238	17.2589	17.1271	17.5345	17.5777	17.352	17.3761	17.5607	17.5114	17.3364	17.4842	17.3865	17.3207	17.2767	17.387	17.6064	17.5744	17.5563	17.6169	17.4687	17.533	17.5264	17.7759	17.9114	17.549	17.6247	17.5737	17.2679	17.3847	17.4454	17.4284	17.6743	17.5536	17.4859	16.9974	17.0804	16.8042	16.9217	16.9871	17.0173	16.9472
Virma_A2AIV2_S138_1	Virma	A2AIV2	S138	1	14.9225	16.4278	14.334	16.2775	14.688	NA	NA	15.8707	NA	NA	16.1433	14.2312	16.8202	16.2961	15.953	NA	16.2539	NA	NA	15.0044	14.9588	16.0983	15.7755	14.1126	16.1516	16.1575	16.1946	16.2622	16.2405	15.7247	15.3615	16.9216	16.9457	15.7095	16.817	16.3159	16.1047	NA	12.251	NA	16.001	15.3043	NA	NA	15.3079
Virma_A2AIV2_S133_1	Virma	A2AIV2	S133	1	NA	12.6729	17.3318	13.1076	15.1803	16.6339	17.2687	NA	17.5964	17.0334	13.8828	NA	NA	NA	12.6625	NA	NA	NA	15.3936	11.6015	17.2892	11.1781	10.7709	17.0719	NA	9.64674	10.6386	NA	13.2359	14.3129	NA	16.2422	NA	16.7848	NA	15.7289	15.9271	NA	16.0749	17.5247	NA	16.9029	17.4645	NA	NA
Card9_A2AIV8_S461_1	Card9	A2AIV8	S461	1	13.5755	NA	13.7672	16.2476	13.882	15.5105	13.9316	15.783	16.126	NA	16.0954	13.9264	15.3804	16.4922	15.7872	16.0131	13.7577	15.557	15.309	14.2837	14.7948	15.6562	15.7782	15.2283	14.8037	14.0057	15.1045	14.9282	15.4554	15.4415	14.6331	16.0135	NA	15.4434	14.4101	15.2809	14.1583	15.7704	14.3727	14.0143	13.6616	15.3878	14.8521	13.2872	14.3497
Entr1_A2AIW0_S256_2	Entr1	A2AIW0	S256	2	19.1606	17.1412	NA	NA	NA	NA	20.8584	20.2113	NA	NA	NA	NA	17.4541	NA	NA	NA	NA	18.4202	20.3318	20.7477	NA	20.0512	18.0654	18.489	20.4383	NA	NA	NA	16.7629	NA	NA	NA	15.8538	NA	NA	NA	17.1639	NA	20.2745	19.3884	NA	21.2448	NA	20.3937	21.0569
Entr1_A2AIW0_S245_2	Entr1	A2AIW0	S245	2	19.1606	17.1412	NA	NA	NA	NA	20.8584	20.2774	NA	NA	NA	NA	17.4541	NA	NA	NA	NA	18.4202	20.3318	20.7477	NA	20.0512	18.0654	18.489	20.4383	NA	NA	NA	16.7629	NA	NA	NA	15.8538	NA	NA	NA	17.1639	NA	20.2745	19.3884	NA	21.2448	NA	20.3937	21.0569
Entr1_A2AIW0_S241_2	Entr1	A2AIW0	S241	2	NA	NA	NA	NA	NA	NA	NA	15.7948	NA	NA	NA	NA	NA	NA	NA	NA	NA	NA	NA	NA	NA	NA	NA	NA	NA	NA	NA	NA	NA	NA	NA	NA	NA	NA	NA	NA	NA	NA	NA	NA	NA	NA	NA	NA	NA
Man1b1_A2AJ15_S102_1	Man1b1	A2AJ15	S102	1	14.4959	14.969	14.7276	15.1974	14.9163	14.7393	14.5605	14.6519	14.9265	14.8755	14.749	14.7526	14.9111	14.579	14.698	14.9957	14.7888	14.6413	15.469	15.1321	15.3822	14.8256	14.9395	14.9985	15.2055	15.0467	14.94	14.9	15.2172	14.9324	15.0052	14.946	14.8029	14.9386	14.8848	14.8785	14.8881	14.991	15.737	15.1467	15.0806	14.5576	14.9007	14.9741	14.8792
Pnpla7_A2AJ88_S379_1	Pnpla7	A2AJ88	S379	1	18.8994	18.585	18.8531	18.4979	18.9068	18.8703	18.2462	18.7564	18.9591	18.5895	19.1939	18.8193	18.9043	19.0357	18.7984	18.9079	18.8848	19.0933	18.2697	17.9357	17.755	17.7476	18.2864	18.4116	18.3083	17.8582	17.7039	18.1629	17.9764	18.0319	18.1298	18.3115	18.6022	18.5877	17.8139	18.7796	18.7861	17.8549	18.0041	17.9536	18.6927	18.2908	17.7355	18.1223	18.5411
Pnpla7_A2AJ88_Y342_1	Pnpla7	A2AJ88	Y342	1	NA	NA	NA	14.5373	NA	NA	15.3491	NA	NA	NA	NA	NA	NA	NA	NA	NA	NA	NA	14.6191	15.0497	NA	NA	15.1855	15.4369	15.0873	15.1324	NA	NA	13.4844	NA	14.7278	NA	NA	NA	NA	NA	15.2645	NA	15.3333	14.6435	NA	15.648	13.7755	NA	NA
Pnpla7_A2AJ88_S341_1	Pnpla7	A2AJ88	S341	1	15.8226	14.8823	15.7533	NA	16.1726	15.6109	NA	NA	15.403	15.3485	16.209	15.7327	15.455	15.8867	15.7885	15.8716	15.757	15.8501	NA	NA	NA	NA	NA	NA	15.0518	NA	NA	NA	NA	NA	NA	15.1184	15.0702	15.713	15.4373	NA	NA	15.4621	NA	15.2656	16.1995	NA	14.8674	15.7697	15.8536
Pnpla7_A2AJ88_S1280_1	Pnpla7	A2AJ88	S1280	1	NA	14.5169	NA	NA	NA	14.5923	NA	NA	NA	NA	NA	NA	NA	NA	14.2087	NA	14.4402	NA	14.7632	14.7555	NA	NA	NA	NA	14.6611	NA	NA	NA	14.2978	15.1649	NA	NA	NA	NA	14.4977	15.072	NA	NA	NA	NA	NA	NA	NA	NA	NA
Pnpla7_A2AJ88_T1284_1	Pnpla7	A2AJ88	T1284	1	NA	NA	NA	15.1362	NA	NA	14.9369	14.9267	14.2405	13.1531	14.8495	NA	NA	NA	NA	NA	NA	NA	14.827	NA	NA	14.7239	NA	14.1585	NA	14.8509	15.0674	14.7487	14.437	NA	NA	NA	15.2667	15.1887	14.7182	NA	15.3686	NA	14.9095	15.2715	15.2832	14.9442	NA	15.1122	NA
Pnpla7_A2AJ88_Y1282_1	Pnpla7	A2AJ88	Y1282	1	NA	NA	15.0013	15.356	NA	NA	NA	NA	NA	NA	NA	NA	NA	NA	NA	NA	NA	NA	NA	NA	14.9098	NA	NA	NA	NA	NA	NA	NA	NA	NA	NA	NA	NA	NA	NA	NA	NA	NA	NA	NA	NA	NA	NA	NA	NA
Pnpla7_A2AJ88_Y1286_2	Pnpla7	A2AJ88	Y1286	2	NA	NA	NA	14.0587	NA	NA	13.8293	14.7862	NA	NA	14.3108	12.5491	NA	NA	NA	14.1929	NA	NA	NA	NA	13.3331	NA	NA	NA	NA	NA	NA	NA	NA	NA	13.4022	NA	NA	NA	NA	NA	NA	NA	NA	NA	NA	NA	NA	NA	NA
Pnpla7_A2AJ88_Y1282_2	Pnpla7	A2AJ88	Y1282	2	NA	NA	15.0347	14.0587	NA	14.8067	14.8293	14.7862	NA	14.1492	14.3108	12.5491	12.6338	13.7369	NA	14.1929	NA	14.5181	14.5884	14.2339	14.3331	NA	NA	13.7828	14.0578	NA	NA	13.7645	13.8875	9.29703	14.4022	NA	NA	11.1426	12.5166	NA	NA	10.5778	15.8829	15.2627	15.1627	NA	14.0863	13.5894	NA
Pnpla7_A2AJ88_T1284_2	Pnpla7	A2AJ88	T1284	2	NA	NA	15.0347	NA	NA	14.8067	13.8293	NA	NA	14.1492	NA	NA	12.6338	13.7369	NA	NA	NA	14.5181	14.5884	14.2339	13.3331	NA	NA	13.7828	14.0578	NA	NA	13.7645	13.8875	9.29703	13.4022	NA	NA	11.1426	12.5166	NA	NA	10.5778	15.8829	15.2627	15.1627	NA	14.0863	13.5894	NA
Pnpla7_A2AJ88_S444_1	Pnpla7	A2AJ88	S444	1	13.4282	NA	NA	NA	14.3262	13.7753	14.2187	13.3156	11.9879	NA	12.5171	11.8562	NA	13.9705	12.9486	NA	11.7336	12.4072	NA	NA	NA	NA	12.7843	10.5922	NA	11.3986	10.0618	11.4084	NA	13.2456	NA	NA	11.9253	12.8747	NA	NA	13.4817	NA	13.0038	NA	13.2733	12.1748	8.2998	13.0531	NA
Map7d1_A2AJI0_S401_1	Map7d1	A2AJI0	S401	1	19.5866	19.6062	19.6456	19.75	19.4935	19.4063	19.4709	19.6706	19.8397	19.8982	19.9878	20.027	19.7899	19.7974	19.9157	19.9358	19.752	19.6845	19.7417	19.8042	19.732	19.8158	19.6563	19.846	19.6784	19.6357	19.6333	19.956	19.9912	20.2989	19.8375	19.7212	19.7779	19.9077	20.0001	19.6963	19.564	20.147	19.1668	19.1027	18.9397	18.9477	18.9076	19.0815	18.9716
Map7d1_A2AJI0_T99_2	Map7d1	A2AJI0	T99	2	18.5211	18.4428	18.5133	18.6029	18.261	18.3289	16.0458	18.2721	18.2572	18.2404	18.2383	18.6266	18.5936	17.8141	18.1031	18.1555	18.3732	18.0115	18.2048	18.4316	15.6838	15.3413	17.9487	15.1448	18.1906	18.2378	18.1366	18.0646	15.8684	18.7544	18.2525	18.3973	18.5822	17.8304	18.3067	17.9494	18.0875	18.3351	18.6814	17.9505	18.4629	18.4109	18.3425	18.706	17.924
Map7d1_A2AJI0_S95_2	Map7d1	A2AJI0	S95	2	18.5211	18.4428	18.5133	18.6029	18.261	18.3289	16.0458	18.2721	18.2572	18.2404	18.2383	18.6266	18.5936	17.8141	18.1031	18.1555	18.3732	18.0115	18.2048	18.4316	15.6838	15.3413	17.9487	15.1448	18.1906	18.2378	18.1366	18.0646	15.8684	18.7544	18.2525	18.3973	18.5822	17.8304	18.3067	17.9494	18.0875	18.3351	18.6814	17.9505	18.4629	18.4109	18.3425	18.706	17.924
Map7d1_A2AJI0_S483_1	Map7d1	A2AJI0	S483	1	NA	17.8236	NA	NA	17.5856	15.6714	16.0184	NA	16.3799	NA	16.9045	15.6594	NA	NA	NA	NA	NA	16.7533	14.0074	NA	16.4468	16.3983	16.7205	NA	16.5629	17.1033	15.5441	NA	17.4804	16.5498	17.5457	17.2907	17.8719	NA	17.5181	15.8152	NA	NA	15.7552	16.2428	18.0308	16.2895	NA	NA	NA
Map7d1_A2AJI0_S496_2	Map7d1	A2AJI0	S496	2	15.7254	16.139	16.6361	15.41	NA	16.6698	16.9198	16.8348	15.1904	15.6983	17.1015	16.621	16.179	NA	15.5249	14.7489	17.0877	16.4708	16.7516	15.8694	16.0387	17.2089	16.0948	15.4056	16.2251	12.7783	16.7432	15.9976	14.6414	NA	16.4351	16.1718	16.2511	14.9624	16.5257	16.1034	16.4658	16.2801	NA	15.5214	16.2734	17.3273	15.4287	16.5992	16.5735
Map7d1_A2AJI0_S479_2	Map7d1	A2AJI0	S479	2	14.3285	NA	15.0954	15.41	NA	15.3162	16.0779	15.7222	15.1904	14.7248	16.4079	16.621	15.79	NA	14.5224	14.7489	16.6109	NA	15.5937	14.878	NA	16.1899	16.0948	15.4056	15.7034	NA	15.7023	15.9976	14.6414	NA	16.4351	15.7024	16.2511	14.9624	16.5257	14.9957	16.1905	16.2801	NA	15.5214	16.2734	16.3895	NA	14.6696	16.0597
Map7d1_A2AJI0_S479_1	Map7d1	A2AJI0	S479	1	16.8801	NA	18.0318	15.0493	17.6929	19.476	17.0598	NA	NA	16.7668	16.4277	15.7243	15.8512	15.8289	NA	NA	15.8896	16.4685	NA	17.7889	16.2357	16.4006	14.8134	NA	17.2	NA	17.0226	NA	16.513	15.6328	NA	NA	16.599	16.6353	16.1802	16.0202	16.6549	16.8841	NA	15.7597	15.6869	19.5968	19.1409	19.2389	15.6577
Map7d1_A2AJI0_S483_2	Map7d1	A2AJI0	S483	2	15.0363	16.139	16.0284	NA	NA	15.9536	15.7422	15.9393	NA	14.6712	15.7119	NA	14.0977	NA	14.5274	NA	15.2585	16.4708	15.8939	14.8608	16.0387	16.2277	NA	NA	14.5045	12.7783	15.7831	NA	NA	NA	NA	14.3238	NA	NA	NA	15.2035	13.9408	NA	NA	NA	NA	16.2624	15.4287	16.1599	14.8348
Map7d1_A2AJI0_S496_1	Map7d1	A2AJI0	S496	1	13.9621	15.2204	15.4357	14.6661	15.2732	14.2736	15.2385	15.9286	14.6658	12.8726	15.2724	13.8143	14.4083	14.9586	15.61	13.336	NA	13.087	14.8256	15.3975	15.7943	15.7995	16.0864	14.3692	14.2385	15.4003	14.9654	13.0963	14.473	13.0581	15.2543	14.9243	14.9738	14.7685	14.8144	14.9888	14.8544	15.7555	13.4386	NA	16.4557	15.6043	NA	15.3813	14.9291
Map7d1_A2AJI0_S254_1	Map7d1	A2AJI0	S254	1	15.8741	14.3327	14.8072	14.9457	16.2682	15.9836	16.8249	17.1807	15.9247	13.4087	16.4189	13.9285	14.3853	16.8191	16.3835	15.1747	15.5274	14.8463	14.115	14.6489	14.2774	14.9018	14.1301	15.0985	15.2694	15.2505	14.3183	14.7186	14.8415	14.59	14.4476	13.3947	14.646	15.5101	15.2934	11.3861	16.5642	14.0479	16.4244	13.2488	15.9249	16.1768	13.628	16.8141	15.6058
Map7d1_A2AJI0_S256_1	Map7d1	A2AJI0	S256	1	14.0017	13.4522	13.7775	12.2878	NA	12.3131	NA	NA	13.0562	14.2311	NA	12.0013	NA	12.1469	NA	12.1587	12.476	12.777	13.4259	13.9503	12.18	NA	12.9532	12.0809	13.0495	NA	NA	13.4185	12.0454	11.7376	NA	13.0359	11.2402	NA	12.2886	14.0272	19.3225	20.2731	NA	13.3025	NA	11.8144	13.04	NA	13.3162
Map7d1_A2AJI0_S444_1	Map7d1	A2AJI0	S444	1	15.4268	14.7682	14.4826	13.6201	16.1501	15.6674	15.795	15.946	14.9783	12.5867	15.125	13.4145	14.4107	15.9855	15.3912	13.9084	14.4938	14.7341	14.7684	14.7007	14.1523	14.0013	14.0131	14.5473	15.3119	15.3602	12.9622	14.5269	14.4243	14.3032	13.8935	14.0943	15.1037	14.0476	14.6537	14.0184	15.9585	13.6218	15.1013	12.3335	14.5767	13.773	12.6852	15.5547	13.3742
Map7d1_A2AJI0_S519_1	Map7d1	A2AJI0	S519	1	NA	15.223	15.2423	NA	NA	NA	NA	NA	NA	NA	NA	NA	NA	NA	NA	NA	NA	14.7078	NA	15.2243	NA	NA	NA	NA	NA	NA	NA	NA	NA	NA	NA	NA	NA	NA	NA	NA	14.5142	NA	15.0968	NA	NA	NA	NA	NA	NA
Map7d1_A2AJI0_T554_3	Map7d1	A2AJI0	T554	3	NA	NA	NA	NA	NA	NA	NA	15.9471	16.499	13.389	20.8567	21.2694	NA	20.7851	NA	21.2501	NA	NA	NA	NA	NA	10.8591	NA	NA	16.0881	15.6805	NA	9.22271	12.9612	12.1159	NA	12.2772	NA	11.5068	NA	NA	NA	14.1704	NA	NA	14.9185	14.3276	NA	21.9369	NA
Map7d1_A2AJI0_S548_3	Map7d1	A2AJI0	S548	3	20.5674	21.2236	21.4045	21.2341	20.6276	21.2314	20.9049	20.847	20.7925	20.8861	20.8147	21.2665	20.9591	20.7138	20.8145	21.2501	21.0372	20.5664	20.4554	20.483	20.7719	21.0669	20.7312	21.2002	20.1623	20.3157	21.0327	21.1572	21.4062	21.1703	21.4768	21.4663	21.4575	21.0871	21.4682	21.066	21.1536	21.3762	21.9709	21.6713	21.4751	21.7051	21.3491	21.9263	21.4675
Map7d1_A2AJI0_S544_3	Map7d1	A2AJI0	S544	3	20.5674	21.2236	21.4045	21.2341	20.6276	21.2314	20.9049	20.8946	20.8642	20.8941	20.8567	21.2694	20.9591	20.7851	20.8145	21.2501	21.0372	20.5664	20.4554	20.483	20.7719	21.0681	20.7312	21.2002	20.2455	20.3726	21.0327	21.1576	21.4103	21.173	21.4768	21.4687	21.4575	21.089	21.4682	21.066	21.1536	21.3859	21.9709	21.6713	21.4903	21.7137	21.3491	21.9369	21.4675
Map7d1_A2AJI0_S552_3	Map7d1	A2AJI0	S552	3	20.5674	21.2236	21.4045	21.2341	20.6276	21.2314	20.9049	20.8946	20.8642	20.8941	15.7347	12.3124	20.9591	16.4121	20.8145	NA	21.0372	20.5664	20.4554	20.483	20.7719	21.0681	20.7312	21.2002	20.2455	20.3726	21.0327	21.1576	21.4103	21.173	21.4768	21.4687	21.4575	21.089	21.4682	21.066	21.1536	21.3859	21.9709	21.6713	21.4903	21.7137	21.3491	14.8309	21.4675
Map7d1_A2AJI0_S548_2	Map7d1	A2AJI0	S548	2	19.9926	20.1538	20.2061	20.5449	20.064	20.1462	20.2816	20.2799	20.2954	20.1666	20.0659	20.2864	20.0136	20.0824	20.0358	20.2132	20.0662	19.5449	19.8634	20.1581	20.0778	20.2525	20.0049	20.0511	19.9077	19.992	19.9094	20.0138	20.2997	20.0704	20.022	19.9506	20.0681	20.015	20.0676	19.7564	19.9906	20.0468	20.4564	20.9075	20.5668	20.778	20.6724	20.9134	20.5249
Map7d1_A2AJI0_S544_2	Map7d1	A2AJI0	S544	2	19.9926	20.1538	20.2232	20.4821	20.0177	20.1462	20.2816	20.2799	20.2727	20.1375	20.0659	20.2864	20.0136	20.0883	20.0358	20.2132	20.0585	19.5449	19.8174	20.1581	20.0778	20.216	20.0023	20.0511	19.9077	19.992	19.9094	20.0486	20.3103	20.0704	20.022	19.9506	20.0681	19.9963	20.2259	19.7138	20.2102	20.0699	20.3882	20.8503	20.5354	20.778	20.6724	20.9134	20.4754
Map7d1_A2AJI0_T554_2	Map7d1	A2AJI0	T554	2	NA	NA	NA	15.9926	15.0799	NA	NA	NA	14.2895	14.5199	NA	NA	NA	NA	NA	NA	15.8872	NA	14.8701	NA	NA	14.9307	15.8073	NA	NA	NA	NA	14.6603	15.9128	NA	NA	NA	NA	13.737	16.9592	14.6521	17.386	NA	15.7153	15.9462	15.0314	NA	NA	NA	15.6349
Map7d1_A2AJI0_S544_1	Map7d1	A2AJI0	S544	1	NA	NA	NA	17.3964	NA	NA	17.1005	NA	NA	17.2472	17.3744	17.4214	17.2446	NA	17.1506	17.5005	NA	NA	NA	NA	NA	NA	NA	NA	NA	NA	NA	NA	NA	17.0593	17.182	17.4394	17.6241	NA	17.3449	17.1411	NA	17.2333	16.9563	17.2845	17.0558	NA	NA	NA	NA
Map7d1_A2AJI0_S548_1	Map7d1	A2AJI0	S548	1	15.8982	16.8059	16.6564	NA	16.8622	16.9438	NA	17.1608	17.033	NA	NA	NA	NA	17.2132	NA	NA	NA	16.9609	16.9947	16.9696	17.0293	16.9008	17.0221	17.0843	16.9536	16.9051	16.8295	16.9448	17.3384	NA	NA	17.3991	NA	17.2713	NA	NA	17.3059	NA	NA	NA	NA	17.1888	16.9687	17.3239	17.0363
Map7d1_A2AJI0_S552_2	Map7d1	A2AJI0	S552	2	NA	NA	13.8146	NA	NA	NA	NA	NA	NA	NA	NA	NA	NA	12.1425	NA	NA	NA	NA	NA	NA	NA	NA	13.4909	NA	NA	NA	NA	NA	14.2258	NA	NA	NA	NA	NA	NA	NA	NA	14.0964	13.6169	13.696	NA	NA	NA	NA	NA
Map7d1_A2AJI0_T455_1	Map7d1	A2AJI0	T455	1	NA	13.9297	NA	16.6511	NA	13.3751	14.7617	16.9088	14.4791	14.4177	15.2446	NA	15.7901	15.2062	NA	16.4588	NA	14.6527	NA	NA	NA	16.3826	NA	NA	NA	NA	14.2795	NA	14.1885	NA	16.3761	15.3995	NA	14.7108	14.6048	15.7574	16.8448	15.2668	NA	NA	NA	15.9444	NA	14.2274	13.9038
Map7d1_A2AJI0_S460_1	Map7d1	A2AJI0	S460	1	13.9938	14.0982	14.0457	15.2749	14.0534	13.2603	14.377	16.3425	NA	NA	NA	NA	13.9635	16.305	15.186	NA	13.3609	13.8405	14.1903	14.2612	14.3254	15.8142	16.1282	NA	14.0566	13.7337	14.6031	16.8074	NA	NA	NA	13.1519	NA	NA	NA	13.3481	NA	14.022	13.9656	13.5776	13.1196	14.0312	13.2513	13.0667	NA
Map7d1_A2AJI0_S454_1	Map7d1	A2AJI0	S454	1	13.83	11.4765	11.8858	12.4982	15.0514	14.1246	14.7049	14.8026	13.8883	NA	13.7915	NA	13.2996	15.2689	14.3659	12.9003	12.4125	12.9163	12.327	11.569	NA	12.0329	12.9214	13.4874	12.3395	13.8898	12.0787	12.2579	13.5661	14.0157	12.3393	NA	14.9561	14.1013	12.2091	11.9449	15.5338	12.5121	14.5375	NA	12.1783	10.48	11.6648	13.9048	10.5072
Map7d1_A2AJI0_S368_2	Map7d1	A2AJI0	S368	2	NA	NA	NA	NA	NA	NA	NA	NA	NA	NA	15.4122	NA	NA	NA	NA	NA	NA	NA	NA	NA	NA	NA	14.7571	NA	NA	NA	15.0163	NA	15.4232	15.539	NA	NA	NA	NA	NA	NA	NA	NA	14.8966	NA	NA	NA	NA	15.7868	15.1037
Map7d1_A2AJI0_S366_2	Map7d1	A2AJI0	S366	2	15.3785	NA	NA	15.8556	NA	NA	NA	15.8002	15.3234	15.4725	15.4122	NA	NA	15.0812	15.5513	NA	19.1871	NA	NA	NA	15.2692	NA	15.7953	17.7539	15.1637	NA	15.0163	15.0956	15.4232	15.539	NA	NA	NA	NA	15.7504	NA	NA	NA	14.8966	NA	NA	15.5267	NA	15.7868	15.1037
Map7d1_A2AJI0_S370_2	Map7d1	A2AJI0	S370	2	15.3785	NA	NA	15.8556	NA	NA	NA	15.8002	15.3234	15.4725	NA	NA	NA	15.0812	15.5513	NA	NA	NA	NA	NA	15.2692	NA	14.8326	NA	15.1637	NA	NA	15.0956	NA	NA	NA	NA	NA	NA	15.7504	NA	NA	NA	NA	NA	NA	15.5267	NA	NA	NA
Map7d1_A2AJI0_T373_2	Map7d1	A2AJI0	T373	2	NA	NA	NA	NA	NA	NA	NA	NA	NA	NA	NA	NA	NA	NA	NA	NA	19.1871	NA	NA	NA	NA	NA	NA	17.7539	NA	NA	NA	NA	NA	NA	NA	NA	NA	NA	NA	NA	NA	NA	NA	NA	NA	NA	NA	NA	NA
Map7d1_A2AJI0_S368_1	Map7d1	A2AJI0	S368	1	14.3895	NA	13.7425	15.443	13.9725	13.7101	14.8352	14.987	NA	NA	NA	15.5258	NA	14.3516	NA	NA	12.71	14.6309	12.5409	14.8187	14.4566	14.3145	14.4606	14.6894	14.523	14.4195	14.1905	14.7932	13.7439	NA	NA	15.308	14.4291	NA	15.1686	14.7685	14.7143	NA	NA	13.5947	NA	NA	13.8058	13.1644	13.9971
Map7d1_A2AJI0_T121_1	Map7d1	A2AJI0	T121	1	NA	NA	17.8075	17.9643	16.6762	16.2237	17.5614	17.697	18.1328	18.0064	18.7234	16.5378	16.963	17.9872	18.4367	18.5147	16.8393	14.0742	NA	NA	NA	NA	NA	16.0197	14.4566	12.31	NA	14.3681	NA	NA	NA	18.8613	NA	NA	NA	NA	17.9544	NA	NA	NA	NA	NA	NA	NA	NA
Map7d1_A2AJI0_S125_1	Map7d1	A2AJI0	S125	1	NA	NA	NA	NA	NA	NA	17.5434	NA	14.2847	NA	NA	NA	NA	NA	NA	NA	NA	NA	NA	14.4633	NA	18.7634	NA	14.6299	NA	NA	NA	15.1171	NA	NA	NA	NA	NA	NA	NA	16.8144	NA	NA	NA	NA	14.1531	NA	NA	NA	NA
Map7d1_A2AJI0_S118_1	Map7d1	A2AJI0	S118	1	NA	16.6201	NA	NA	NA	NA	NA	NA	NA	NA	NA	NA	NA	NA	NA	NA	NA	NA	NA	NA	NA	NA	NA	NA	NA	NA	NA	NA	NA	NA	NA	NA	NA	NA	NA	NA	NA	NA	NA	NA	NA	NA	NA	NA	NA
Map7d1_A2AJI0_S127_1	Map7d1	A2AJI0	S127	1	NA	NA	NA	NA	NA	NA	NA	NA	NA	NA	NA	NA	NA	NA	NA	NA	NA	NA	NA	NA	15.4201	16.6321	16.6132	16.651	NA	NA	16.4731	17.0069	15.9216	17.1487	NA	NA	18.2552	15.8969	NA	NA	16.7736	NA	NA	NA	NA	NA	NA	NA	NA
Map7d1_A2AJI0_T120_1	Map7d1	A2AJI0	T120	1	NA	NA	NA	NA	NA	NA	NA	NA	NA	NA	NA	NA	NA	NA	16.2923	NA	NA	NA	NA	NA	NA	NA	NA	10.4139	NA	NA	NA	NA	NA	NA	NA	NA	NA	NA	NA	NA	NA	NA	NA	NA	NA	NA	NA	NA	NA
Map7d1_A2AJI0_T121_2	Map7d1	A2AJI0	T121	2	NA	NA	NA	NA	NA	NA	NA	NA	NA	NA	NA	NA	NA	NA	NA	NA	NA	NA	NA	NA	NA	NA	14.7085	NA	NA	NA	NA	NA	NA	14.8335	NA	NA	14.9067	NA	NA	NA	NA	14.2511	NA	14.7983	NA	16.3294	NA	NA	NA
Map7d1_A2AJI0_S115_2	Map7d1	A2AJI0	S115	2	20.3446	20.3285	20.4847	20.4671	20.1024	20.3148	20.4082	20.4351	20.3777	20.3802	20.5186	20.4852	20.2719	20.3923	20.4183	20.4347	20.1724	20.1557	NA	NA	NA	NA	NA	NA	NA	NA	NA	NA	NA	NA	NA	NA	NA	NA	NA	NA	NA	NA	NA	NA	NA	NA	NA	NA	NA
Map7d1_A2AJI0_T120_2	Map7d1	A2AJI0	T120	2	NA	NA	NA	NA	NA	NA	NA	NA	NA	NA	NA	NA	NA	NA	NA	NA	NA	NA	NA	NA	NA	NA	14.7085	NA	NA	NA	NA	NA	NA	14.8335	NA	NA	NA	NA	NA	NA	NA	14.2511	NA	14.7983	NA	16.3294	NA	NA	NA
Map7d1_A2AJI0_S118_2	Map7d1	A2AJI0	S118	2	20.3446	20.3285	20.4847	20.4671	20.1024	20.3148	20.4082	20.4351	20.3777	20.3802	20.5186	20.4852	20.2719	20.3923	20.4183	20.4347	20.1724	20.1557	NA	NA	NA	NA	NA	NA	NA	NA	NA	NA	NA	NA	NA	NA	14.9067	NA	NA	NA	NA	NA	NA	NA	NA	NA	NA	NA	NA
Map7d1_A2AJI0_S114_1	Map7d1	A2AJI0	S114	1	NA	NA	20.7947	NA	NA	21.3245	NA	NA	NA	NA	21.2363	NA	NA	NA	NA	NA	20.5084	NA	NA	NA	NA	NA	NA	NA	NA	NA	NA	NA	NA	NA	NA	NA	NA	NA	NA	NA	NA	NA	NA	NA	NA	NA	NA	NA	NA
Map7d1_A2AJI0_S115_1	Map7d1	A2AJI0	S115	1	21.5234	20.9876	17.9428	20.8349	21.6019	18.505	21.6458	21.7564	21.3183	20.8	18.4738	20.8812	21.0043	21.7699	21.4841	18.1276	17.8769	20.9405	NA	NA	NA	NA	NA	NA	NA	NA	NA	NA	NA	NA	NA	NA	NA	NA	NA	NA	NA	NA	NA	NA	NA	NA	NA	NA	NA
Map7d1_A2AJI0_S275_1	Map7d1	A2AJI0	S275	1	13.651	13.649	12.9799	14.3486	13.0734	13.2312	NA	NA	13.4536	13.6844	NA	13.6161	NA	12.9099	13.3247	14.8745	NA	13.4266	NA	13.5305	14.0932	NA	NA	13.1741	NA	13.5281	NA	12.9397	13.2575	NA	NA	13.0741	NA	13.0477	NA	NA	NA	NA	NA	12.358	NA	NA	NA	NA	NA
Chd7_A2AJK6_S2548_1	Chd7	A2AJK6	S2548	1	16.6472	16.7429	16.6404	16.7708	16.4358	16.8152	16.4784	16.4897	16.5208	16.5017	16.5106	16.7934	16.7441	16.4767	15.6869	16.6075	16.7587	16.7952	16.7078	16.7263	17.0026	16.8611	16.8605	16.7842	16.7971	16.6144	16.9087	16.6637	16.7707	16.7757	16.9962	17.0632	17.0474	16.8688	17.0228	16.9226	16.8386	16.9588	17.2338	17.232	17.1226	17.2739	17.4074	17.1764	17.182
Chd7_A2AJK6_S2945_1	Chd7	A2AJK6	S2945	1	15.9555	15.8538	15.7805	15.9197	15.6717	15.8849	15.4849	15.8845	15.5913	15.6633	15.4589	16.0073	15.417	15.5759	15.3186	15.4608	15.2997	15.2998	15.891	15.9296	16.1595	16.0485	15.8703	15.9464	16.024	15.915	16.0991	15.7941	16.0103	15.6886	15.7741	16.1074	15.8777	15.7931	16.114	15.6571	15.6169	15.7095	16.019	16.1413	15.8628	15.8405	15.9199	16.0401	15.839
Pnisr_A2AJT4_S211_1	Pnisr	A2AJT4	S211	1	15.3613	15.2692	15.8744	15.9336	15.3081	15.5171	15.6992	15.879	15.7045	15.8912	15.7874	15.8785	16.0384	15.5616	15.7886	15.9149	16.2956	15.7957	16.0328	15.8783	15.8418	15.5936	15.8635	15.7523	16.0408	15.7779	15.747	15.518	15.8033	14.7675	16.5267	16.3103	16.2526	15.6397	16.3462	16.4161	16.0455	16.1705	15.667	15.7121	15.4415	15.4753	15.3649	15.2414	15.6584
Pnisr_A2AJT4_S290_1	Pnisr	A2AJT4	S290	1	NA	14.5133	NA	15.0987	14.9923	NA	15.1661	15.1394	NA	NA	15.064	NA	NA	14.9328	NA	15.3728	15.7196	15.2305	14.9118	NA	14.7128	14.9318	14.9678	14.848	15.385	15.352	15.1884	NA	15.2364	NA	15.0433	15.2876	14.6691	15.3118	NA	15.4736	NA	15.1655	NA	14.2775	18.1069	13.294	13.7828	NA	NA
Pnisr_A2AJT4_S286_1	Pnisr	A2AJT4	S286	1	14.9688	NA	NA	NA	NA	14.9483	NA	NA	14.3558	14.8441	NA	14.499	NA	NA	15.0188	NA	NA	NA	NA	14.6711	NA	NA	NA	NA	NA	NA	NA	15.0049	NA	NA	NA	NA	NA	NA	15.0579	NA	15.1662	NA	NA	NA	NA	NA	NA	NA	14.1902
Ppp1r3d_A2AJW4_T57_2	Ppp1r3d	A2AJW4	T57	2	NA	NA	NA	16.2834	NA	NA	NA	14.3363	16.229	14.7447	16.5516	NA	NA	NA	16.1847	16.2869	NA	14.7414	NA	19.2969	NA	16.88	17.1001	13.9279	19.4246	NA	19.1693	14.0244	14.7199	16.7149	NA	NA	NA	13.6096	16.6134	16.7784	16.7524	NA	NA	15.4404	NA	16.3437	NA	NA	15.4096
Ppp1r3d_A2AJW4_S52_2	Ppp1r3d	A2AJW4	S52	2	NA	NA	NA	17.3066	NA	NA	16.5415	NA	16.229	16.7574	NA	NA	NA	NA	16.6367	NA	NA	17.2818	17.5976	19.2969	NA	16.8063	NA	NA	19.4246	15.5269	19.4973	NA	16.7809	NA	NA	NA	NA	NA	NA	NA	NA	NA	16.8454	15.4404	NA	NA	16.5598	NA	15.4096
Ppp1r3d_A2AJW4_S58_2	Ppp1r3d	A2AJW4	S58	2	16.7959	18.378	17.7535	19.0181	18.3072	18.8186	18.7241	18.3307	19.139	19.2556	19.3326	18.5281	19.4257	18.9071	19.1972	18.0125	19.7838	19.1632	19.4247	17.7735	18.9296	19.0102	18.6699	18.6152	18.5489	18.1175	19.2181	18.9817	18.7487	19.284	18.8075	19.3497	19.4179	19.7713	19.0179	18.7984	19.1926	19.2333	17.1064	18.4671	19.2762	13.669	18.8617	19.4277	18.3702
Ppp1r3d_A2AJW4_S54_2	Ppp1r3d	A2AJW4	S54	2	16.7959	18.378	17.7535	18.7749	18.3072	18.8186	18.3651	18.4185	19.139	19.0495	19.5286	18.5281	19.4257	18.9071	19.1299	18.3936	19.7838	18.7959	18.947	17.7735	18.9296	19.0265	19.0888	18.6701	18.5489	17.8556	18.8094	19.0274	18.4369	19.5086	18.8075	19.3497	19.4179	19.7913	19.2675	19.1163	19.4366	19.2333	14.511	18.4671	19.2762	16.5536	18.5347	19.4277	18.3702
Ppp1r3d_A2AJW4_S25_1	Ppp1r3d	A2AJW4	S25	1	14.6472	14.4314	14.7301	14.4173	NA	NA	NA	NA	14.6976	14.1903	14.9793	14.2535	NA	14.3348	14.4964	12.803	13.3422	14.4734	14.2214	NA	NA	13.3682	13.8553	13.3897	14.6138	15.0364	13.3398	13.9808	14.349	12.7657	14.2389	13.3077	13.8228	14.6603	13.7714	NA	14.6742	14.2657	14.554	NA	14.6396	NA	NA	14.1648	12.7843
Ppp1r3d_A2AJW4_S58_1	Ppp1r3d	A2AJW4	S58	1	16.0772	NA	NA	NA	NA	NA	NA	NA	NA	NA	13.2474	13.6237	12.4676	13.0793	13.3605	13.2432	12.3071	16.023	NA	NA	NA	NA	NA	NA	NA	NA	NA	NA	12.7305	14.4492	NA	13.7384	12.9964	13.2679	13.5238	14.4295	14.2243	14.5523	NA	NA	NA	NA	13.9064	NA	NA
Dcaf10_A2AKB9_S57_2	Dcaf10	A2AKB9	S57	2	17.3211	17.1064	17.2359	17.8589	16.8733	17.5771	17.5667	17.3877	17.537	15.7751	16.9656	17.7474	16.6018	16.482	14.8271	17.5266	16.6757	17.071	16.6903	16.6017	17.221	17.1568	16.8353	15.1258	16.9753	17.1341	16.6183	16.9669	15.1004	17.3747	17.1334	17.338	17.2982	17.0567	17.2826	17.2611	17.25	17.1845	16.5805	17.4642	16.145	17.919	17.7247	17.6734	17.6768
Dcaf10_A2AKB9_S50_2	Dcaf10	A2AKB9	S50	2	17.3211	17.1064	17.2359	17.8589	16.8733	17.5771	17.5667	17.3877	17.537	15.7751	16.9656	17.7474	16.6018	16.482	14.8271	17.5266	16.6757	17.071	16.6903	16.6017	17.221	17.1568	16.8353	15.1258	16.9753	17.1341	16.6183	16.9669	15.1004	17.3747	17.1334	17.338	17.2982	17.0567	17.2826	17.2611	17.25	17.1845	16.5805	17.4642	16.145	17.919	17.7247	17.6734	17.6768
Dcaf10_A2AKB9_S98_1	Dcaf10	A2AKB9	S98	1	17.6542	17.6566	17.9496	18.0139	17.8101	17.9058	17.9189	17.7766	17.6646	18.0245	17.7001	17.5982	17.9492	17.9101	17.7978	17.7372	17.7142	17.5251	17.8711	18.011	18.2251	18.2207	18.2378	17.8993	18.0059	18.0861	18.3248	18.4016	17.9691	18.1973	17.7602	17.5873	17.4818	17.7702	17.8942	17.6521	17.4507	17.9021	17.7552	18.1405	17.9729	17.8424	17.9374	17.9331	18.0222
Dcaf10_A2AKB9_S99_2	Dcaf10	A2AKB9	S99	2	NA	NA	NA	NA	NA	NA	NA	NA	NA	NA	NA	NA	NA	NA	NA	NA	NA	NA	NA	NA	NA	NA	NA	NA	NA	NA	NA	NA	NA	NA	NA	12.3009	NA	NA	NA	12.0382	NA	NA	NA	NA	NA	NA	NA	NA	NA
Dcaf10_A2AKB9_S96_2	Dcaf10	A2AKB9	S96	2	NA	NA	NA	NA	NA	NA	NA	NA	NA	NA	NA	NA	NA	NA	NA	NA	NA	NA	NA	NA	NA	NA	NA	NA	NA	NA	NA	NA	NA	NA	NA	12.3009	15.8491	NA	NA	12.0382	NA	NA	16.291	NA	NA	NA	NA	NA	NA
Dcaf10_A2AKB9_S100_2	Dcaf10	A2AKB9	S100	2	NA	NA	NA	NA	NA	NA	NA	NA	NA	NA	NA	NA	NA	NA	NA	NA	NA	NA	NA	NA	NA	NA	NA	NA	NA	NA	NA	NA	NA	NA	NA	NA	15.8491	NA	NA	NA	NA	NA	16.291	NA	NA	NA	NA	NA	NA
Ptpn3_A2ALK8_S441_1	Ptpn3	A2ALK8	S441	1	NA	NA	NA	NA	NA	17.6528	NA	17.3224	16.8332	15.396	17.0869	15.5726	16.1112	18.0433	17.1653	16.2635	16.1664	16.3981	16.2857	16.3255	16.1827	16.4915	16.4662	16.8045	17.0143	17.2782	16.9468	16.3463	16.6439	16.4673	16.2847	16.316	16.4021	NA	16.7014	17.2271	17.6247	17.0344	17.4722	15.3699	16.9149	16.5674	NA	17.6344	16.7055
Ptpn3_A2ALK8_S439_1	Ptpn3	A2ALK8	S439	1	17.0485	15.9707	16.3833	NA	17.7832	NA	18.1041	NA	NA	NA	NA	NA	NA	NA	NA	NA	NA	NA	NA	NA	NA	NA	NA	NA	NA	NA	NA	NA	NA	NA	NA	NA	NA	16.8043	NA	NA	NA	NA	NA	NA	NA	NA	15.4655	NA	NA
Ptpn3_A2ALK8_T376_3	Ptpn3	A2ALK8	T376	3	15.1858	14.1842	14.8055	NA	13.8212	15.1637	14.6015	NA	15.9025	14.8316	15.2855	NA	14.5951	15.9643	15.0246	15.7875	15.9686	14.3076	14.2552	14.6759	14.4379	14.7264	14.8843	15.154	14.3531	14.2382	14.8066	14.7846	14.8512	14.5041	15.6078	NA	14.9743	14.9987	15.0939	15.0702	15.0252	14.888	13.798	13.5395	14.7851	14.7718	14.074	NA	14.7218
Ptpn3_A2ALK8_S372_3	Ptpn3	A2ALK8	S372	3	14.1837	14.1842	NA	NA	13.8212	14.2852	NA	NA	14.8808	NA	15.2855	NA	14.5951	14.952	15.0246	14.7246	15.0462	NA	14.2552	14.6759	NA	NA	NA	15.154	14.3531	14.2382	NA	NA	14.8512	13.4329	14.647	NA	14.9743	14.9987	15.0939	15.0702	15.0252	NA	13.798	NA	14.7851	NA	NA	NA	14.7218
Ptpn3_A2ALK8_S367_3	Ptpn3	A2ALK8	S367	3	15.1858	14.1842	14.8055	NA	13.8212	15.1637	14.6015	NA	15.9025	14.8316	15.2855	NA	14.5951	15.9643	15.0246	15.7875	15.9686	14.3076	14.2552	14.6759	14.4379	14.7264	14.8843	15.154	14.3531	14.2382	14.8066	14.7846	14.8512	14.5041	15.6078	NA	14.9743	14.9987	15.0939	15.0702	15.0252	14.888	13.798	13.5395	14.7851	14.7718	14.074	NA	14.7218
Ptpn3_A2ALK8_S370_3	Ptpn3	A2ALK8	S370	3	14.188	NA	14.8055	NA	NA	14.031	14.6015	NA	14.9238	14.8316	NA	NA	NA	14.9765	NA	14.8478	14.8866	14.3076	NA	NA	14.4379	14.7264	14.8843	NA	NA	NA	14.8066	14.7846	NA	13.572	14.5676	NA	NA	NA	NA	NA	NA	14.888	NA	13.5395	NA	14.7718	14.074	NA	NA
Ptpn3_A2ALK8_S370_2	Ptpn3	A2ALK8	S370	2	14.0333	13.3131	13.8513	NA	NA	NA	NA	NA	NA	NA	13.0939	NA	13.5932	NA	NA	11.8743	NA	NA	NA	NA	NA	NA	NA	12.4971	NA	NA	NA	13.0105	NA	11.1771	12.8056	13.8634	NA	12.2312	13.8621	14.0435	14.1422	12.5593	NA	NA	NA	NA	NA	NA	NA
Ptpn3_A2ALK8_S367_2	Ptpn3	A2ALK8	S367	2	14.0333	14.5137	14.6882	NA	NA	13.9673	13.4726	NA	NA	NA	13.0939	NA	14.5684	13.6945	NA	11.8743	NA	NA	NA	NA	NA	13.6665	12.7692	12.4971	NA	NA	NA	13.0105	NA	11.1771	12.8056	14.8396	NA	12.2312	13.8621	14.0435	14.1422	12.5593	12.6904	NA	NA	13.6647	NA	NA	NA
Ptpn3_A2ALK8_T376_2	Ptpn3	A2ALK8	T376	2	NA	NA	13.5044	NA	NA	NA	13.4726	NA	NA	NA	NA	NA	NA	13.6945	NA	NA	NA	NA	NA	NA	NA	13.6665	12.7692	NA	NA	NA	NA	NA	NA	NA	NA	NA	NA	NA	NA	NA	NA	NA	NA	NA	NA	12.6941	NA	NA	NA
Ptpn3_A2ALK8_S372_2	Ptpn3	A2ALK8	S372	2	NA	13.6898	NA	NA	NA	13.9673	NA	NA	NA	NA	NA	NA	13.5432	NA	NA	NA	NA	NA	NA	NA	NA	NA	NA	NA	NA	NA	NA	NA	NA	NA	NA	13.8154	NA	NA	NA	NA	NA	NA	12.6904	NA	NA	12.6348	NA	NA	NA
Ptpn3_A2ALK8_S467_1	Ptpn3	A2ALK8	S467	1	12.3024	12.7149	NA	12.3759	NA	NA	NA	13.7122	13.3937	13.4946	NA	NA	13.4103	14.1394	13.1581	13.7862	NA	12.8662	11.2738	NA	NA	NA	12.883	NA	11.6082	12.9827	13.0891	NA	13.7786	NA	NA	12.5915	NA	NA	14.2046	13.4846	14.2001	NA	NA	NA	13.7265	NA	12.4671	13.5244	13.9597
Ptpn3_A2ALK8_S469_1	Ptpn3	A2ALK8	S469	1	NA	16.5913	NA	NA	NA	NA	14.8373	NA	NA	NA	NA	NA	NA	NA	NA	NA	NA	NA	NA	9.88191	NA	12.6668	NA	NA	NA	NA	NA	NA	NA	NA	NA	NA	NA	NA	NA	NA	NA	NA	NA	NA	NA	NA	NA	NA	NA
Ptpn3_A2ALK8_S434_1	Ptpn3	A2ALK8	S434	1	NA	NA	NA	NA	NA	NA	12.1153	11.9972	NA	NA	12.6848	12.4481	12.4373	12.6643	12.3725	12.7104	13.2041	NA	NA	NA	13.0642	13.3493	13.1225	12.9624	NA	12.7304	13.2548	NA	12.9114	13.7049	NA	13.039	12.7695	14.064	NA	13.0918	12.4537	13.284	NA	NA	NA	NA	NA	NA	10.5879
Ptpn3_A2ALK8_Y405_1	Ptpn3	A2ALK8	Y405	1	NA	NA	13.3304	13.0159	14.2668	NA	NA	NA	NA	14.2547	NA	NA	NA	15.9471	NA	NA	NA	NA	13.5346	13.725	13.6877	NA	NA	NA	12.7952	NA	NA	NA	NA	NA	NA	NA	NA	NA	NA	NA	NA	NA	NA	NA	NA	NA	NA	NA	NA
Ptpn3_A2ALK8_S395_1	Ptpn3	A2ALK8	S395	1	NA	NA	NA	NA	NA	NA	NA	NA	NA	NA	12.4511	NA	NA	NA	NA	NA	12.413	NA	NA	NA	NA	NA	NA	13.1636	NA	NA	NA	NA	NA	NA	NA	13.416	NA	13.1171	12.7755	13.3013	NA	NA	NA	NA	NA	NA	NA	NA	NA
Ptpn3_A2ALK8_S427_1	Ptpn3	A2ALK8	S427	1	NA	12.983	NA	NA	10.5092	NA	NA	NA	12.7686	NA	NA	NA	NA	NA	NA	NA	NA	NA	13.2775	NA	NA	NA	NA	NA	NA	NA	NA	NA	NA	NA	NA	13.4152	NA	NA	NA	NA	NA	NA	11.8738	NA	NA	NA	NA	NA	NA
Ptpn3_A2ALK8_S430_1	Ptpn3	A2ALK8	S430	1	NA	11.3717	NA	NA	NA	NA	NA	NA	NA	NA	NA	13.3099	NA	NA	12.1961	NA	NA	NA	NA	NA	NA	13.2825	12.6616	13.2977	NA	NA	NA	NA	NA	12.6383	13.7577	NA	NA	12.9527	13.9679	NA	NA	13.3663	NA	NA	NA	NA	NA	NA	NA
Ptpn3_A2ALK8_S425_1	Ptpn3	A2ALK8	S425	1	13.0285	NA	12.9911	12.7514	NA	NA	11.685	NA	NA	13.2793	NA	NA	NA	NA	NA	NA	NA	NA	NA	NA	13.3138	NA	NA	NA	NA	NA	12.9143	NA	NA	NA	NA	NA	NA	NA	NA	13.205	NA	NA	NA	12.5684	NA	NA	NA	NA	12.3801
Ptpn3_A2ALK8_S427_2	Ptpn3	A2ALK8	S427	2	12.2884	NA	NA	NA	NA	NA	NA	NA	NA	NA	NA	NA	NA	NA	NA	NA	NA	NA	NA	NA	NA	NA	NA	NA	NA	NA	NA	NA	NA	NA	NA	NA	NA	NA	NA	NA	NA	NA	NA	12.4419	NA	NA	NA	NA	NA
Ptpn3_A2ALK8_S421_2	Ptpn3	A2ALK8	S421	2	12.2884	NA	NA	NA	NA	NA	NA	NA	NA	NA	NA	NA	NA	NA	NA	NA	NA	NA	NA	NA	NA	NA	NA	NA	NA	NA	NA	NA	NA	NA	NA	NA	NA	NA	NA	NA	NA	NA	NA	12.4419	NA	NA	NA	NA	NA
Ptpn3_A2ALK8_S430_2	Ptpn3	A2ALK8	S430	2	NA	NA	NA	NA	NA	NA	NA	NA	NA	NA	NA	NA	NA	NA	NA	NA	NA	NA	NA	NA	NA	NA	NA	NA	NA	NA	NA	NA	NA	NA	NA	NA	NA	NA	NA	NA	NA	NA	NA	NA	NA	NA	NA	NA	NA
Rap1gap_A2ALS5_S499_1	Rap1gap	A2ALS5	S499	1	14.1787	14.2858	13.9224	NA	13.8179	14.2736	14.6195	15.1337	14.7847	14.5573	13.9426	14.2476	14.232	14.2468	14.8947	13.7384	13.5678	14.2052	14.431	14.5701	14.8032	14.0684	14.2132	14.621	14.823	14.0543	14.3624	14.5532	13.999	14.2906	13.6693	14.2602	14.1604	14.236	13.9202	14.1895	14.3229	13.5657	14.8474	14.337	14.5605	14.6414	14.7105	14.5036	14.314
Rap1gap_A2ALS5_S498_1	Rap1gap	A2ALS5	S498	1	NA	NA	NA	13.8733	NA	NA	14.0426	14.3241	NA	13.9996	13.8307	NA	NA	14.2058	NA	NA	NA	NA	NA	NA	NA	NA	13.796	14.0738	NA	NA	13.8637	13.3831	13.6399	NA	NA	NA	13.8476	NA	NA	NA	14.2157	NA	NA	NA	NA	14.2937	13.9973	NA	13.9762
Shroom2_A2ALU4_S960_1	Shroom2	A2ALU4	S960	1	NA	NA	NA	NA	NA	14.5913	NA	NA	NA	NA	14.316	NA	NA	NA	14.458	NA	NA	NA	NA	NA	15.1278	NA	NA	14.8958	15.5904	NA	NA	NA	NA	NA	14.8979	NA	NA	NA	NA	NA	NA	NA	NA	NA	NA	NA	NA	NA	NA
Shroom2_A2ALU4_Y966_1	Shroom2	A2ALU4	Y966	1	NA	NA	NA	NA	NA	NA	NA	NA	NA	NA	NA	NA	NA	NA	NA	NA	NA	15.3132	NA	NA	NA	15.3305	NA	NA	NA	15.4438	NA	15.5257	NA	NA	NA	NA	NA	NA	NA	NA	NA	NA	NA	14.7488	13.5022	NA	14.4303	NA	14.6499
Dnajc25_A2ALW5_T353_1	Dnajc25	A2ALW5	T353	1	14.726	15.1695	14.9202	15.1058	14.1141	14.4714	14.7433	14.6488	14.9036	14.9837	14.5728	14.4004	15.2039	14.3582	14.324	14.4485	14.6356	13.5347	14.6597	14.287	14.756	15.286	14.6335	15.1656	15.0161	14.7336	15.3774	15.5727	14.7165	13.9423	14.732	15.1747	15.3512	15.1308	15.2522	15.1845	15.2852	14.0313	15.0356	14.9619	15.4344	15.2512	15.8252	14.712	14.7212
Cntln_A2AM05_S7_2	Cntln	A2AM05	S7	2	14.4631	15.4013	15.4177	NA	14.9229	NA	NA	NA	15.6118	NA	13.9801	10.8838	NA	NA	NA	14.3023	11.7472	NA	NA	15.4182	NA	14.0634	NA	13.1678	15.0477	NA	NA	NA	14.6217	11.7951	12.3738	NA	NA	NA	NA	NA	NA	13.5747	15.4624	NA	NA	14.7312	15.5389	14.403	14.81
Cntln_A2AM05_S5_2	Cntln	A2AM05	S5	2	15.945	16.5971	15.4177	NA	16.1798	15.654	NA	15.3071	16.6611	13.3055	15.0412	10.8838	NA	15.4107	15.3567	14.5859	11.7472	NA	NA	16.538	15.3062	15.209	NA	14.5067	16.3024	NA	NA	NA	15.5691	14.2044	13.3788	NA	13.9479	13.9948	NA	13.5758	NA	14.624	16.5487	13.9889	NA	14.7312	15.9874	15.5215	15.7831
Cntln_A2AM05_S9_2	Cntln	A2AM05	S9	2	15.3056	15.7695	NA	NA	15.3977	15.654	NA	15.3071	15.7088	13.3055	14.0998	NA	NA	15.4107	15.3567	12.0995	NA	NA	NA	15.6486	15.3062	14.3413	NA	13.7809	15.5188	NA	NA	NA	14.5145	13.9035	12.3837	NA	13.9479	13.9948	NA	13.5758	NA	13.6717	15.6301	13.9889	NA	NA	14.0832	14.631	14.7556
Cavin4_A2AMM0_S257_1	Cavin4	A2AMM0	S257	1	21.2076	20.3975	20.8088	20.6053	20.2211	20.3259	20.1025	20.3199	20.6258	20.1875	20.7493	20.1149	20.6044	19.4603	20.7702	20.4895	20.2508	20.4638	20.8034	20.0289	20.3923	20.257	20.3577	20.6472	20.956	20.2	21.0579	20.8907	20.0265	20.3913	20.3566	19.5647	20.1352	20.8119	21.0145	19.8503	19.9512	20.0204	21.1234	20.3248	20.6076	19.6898	20.4979	19.3498	19.4429
Cavin4_A2AMM0_S313_1	Cavin4	A2AMM0	S313	1	NA	NA	NA	NA	NA	NA	NA	NA	NA	NA	NA	NA	18.3121	NA	NA	NA	NA	NA	NA	NA	NA	NA	NA	NA	NA	NA	NA	NA	NA	NA	NA	NA	NA	NA	18.3492	NA	NA	NA	NA	NA	NA	NA	NA	NA	NA
Cavin4_A2AMM0_T315_1	Cavin4	A2AMM0	T315	1	NA	NA	NA	NA	NA	NA	NA	NA	NA	NA	NA	NA	NA	NA	NA	NA	NA	NA	NA	NA	NA	NA	NA	NA	NA	NA	NA	NA	NA	NA	NA	18.1104	18.4072	NA	NA	18.2492	NA	NA	NA	NA	NA	NA	NA	NA	NA
Cavin4_A2AMM0_T315_2	Cavin4	A2AMM0	T315	2	17.1315	NA	17.7888	NA	NA	NA	NA	NA	NA	NA	NA	NA	NA	NA	NA	NA	NA	NA	NA	NA	NA	NA	NA	NA	NA	17.2041	NA	NA	NA	NA	NA	NA	NA	NA	NA	NA	NA	NA	17.929	NA	NA	17.8417	17.9421	NA	NA
Cavin4_A2AMM0_S309_2	Cavin4	A2AMM0	S309	2	18.0699	18.5147	18.7137	18.5907	18.2204	18.5657	18.5915	18.2719	18.6943	18.4395	18.5919	17.2758	18.4258	18.4019	18.4454	18.5789	18.3411	18.2183	18.2567	18.2014	17.9517	16.6318	16.3095	17.974	17.9478	18.0105	16.8672	18.0732	18.1735	18.0985	18.1524	17.9673	18.1757	18.2719	17.9954	18.0447	18.1571	17.8978	18.5706	18.3912	16.9092	18.4623	18.5605	16.9196	18.3615
Cavin4_A2AMM0_S313_2	Cavin4	A2AMM0	S313	2	17.0056	18.5147	17.6345	18.5907	18.2204	18.5657	18.5915	18.2719	18.6943	18.4395	18.5919	17.2758	18.4258	18.4019	18.4454	18.5789	18.3411	18.2183	18.2567	18.2014	17.9517	16.6318	16.3095	17.974	17.9478	16.7868	16.8672	18.0732	18.1735	18.0985	18.1524	17.9673	18.1757	18.2719	17.9954	18.0447	18.1571	17.8978	17.0925	18.3912	16.9092	16.9462	17.0404	16.9196	18.3615
Cavin4_A2AMM0_S309_1	Cavin4	A2AMM0	S309	1	18.2012	18.5593	18.4416	18.7476	18.3853	18.6454	18.4863	18.3878	18.5787	18.7736	18.9204	18.7006	17.8672	18.6107	18.6426	18.8696	18.575	18.2551	18.0681	18.3192	18.1449	18.3301	18.3837	18.3204	17.9627	18.054	18.245	18.2878	18.5311	18.6903	18.4947	18.5668	18.7397	18.4291	18.4669	17.2046	18.6908	18.4862	17.3017	18.159	17.5378	17.9006	18.0244	18.0033	17.9244
Cavin4_A2AMM0_S19_1	Cavin4	A2AMM0	S19	1	18.4439	17.7563	18.3484	18.019	18.681	18.0603	18.7112	18.3634	18.5978	18.2078	18.3935	18.1194	NA	NA	18.4205	17.9877	17.707	17.8772	NA	17.9977	NA	18.107	18.3453	18.3297	17.8597	18.2732	17.7243	17.7155	18.1136	NA	17.603	17.7692	17.8269	17.9639	17.2841	17.7541	17.7285	18.0988	17.2905	17.7653	NA	17.481	17.2697	18.3788	17.9883
Cavin4_A2AMM0_S20_1	Cavin4	A2AMM0	S20	1	20.498	20.087	20.812	20.913	22.3077	20.739	21.8102	20.8381	20.2244	19.7968	21.0114	18.6159	20.1832	21.2195	21.9872	21.037	19.7432	21.4441	19.8368	18.331	21.1863	18.9998	20.702	21.2489	21.1733	19.3023	20.5612	20.401	21.3466	20.2994	19.5408	19.638	20.3431	21.0551	20.1246	21.3377	21.1042	19.8236	19.4882	19.8658	21.3227	20.4098	21.7917	20.4095	21.6877
Cavin4_A2AMM0_S20_2	Cavin4	A2AMM0	S20	2	18.1058	18.0819	18.7759	16.9865	19.1782	18.8875	17.9141	18.6522	17.7987	15.8516	17.3648	17.1072	17.8348	17.4611	16.4617	17.6693	17.7377	18.8569	18.1614	16.8208	16.7677	16.6961	14.7207	16.7502	18.0834	17.9993	16.8806	17.0707	16.9251	16.7453	16.2953	17.3452	16.2338	15.1885	16.1782	16.379	16.3071	17.7596	18.5652	17.6174	NA	17.609	17.5258	15.1097	17.5071
Cavin4_A2AMM0_S19_2	Cavin4	A2AMM0	S19	2	17.5914	18.0819	18.1543	17.4513	19.1782	18.8875	17.9141	18.6522	17.7807	14.8833	17.3648	16.7836	17.7593	17.4611	16.9123	17.9339	17.89	18.7697	18.0073	16.8208	16.7677	17.0258	14.7207	16.1888	17.9256	18.2122	17.3413	17.0707	16.926	16.7455	16.2953	16.8562	16.2338	15.1885	16.7643	15.3886	16.6399	17.7596	18.236	17.7564	NA	17.8467	16.577	15.1097	17.8344
Cavin4_A2AMM0_T22_2	Cavin4	A2AMM0	T22	2	16.3682	NA	17.2615	15.5912	NA	NA	NA	NA	15.9515	14.8192	NA	15.7626	15.4161	NA	15.0138	15.3567	14.571	14.7658	14.8588	NA	NA	14.7345	NA	15.1168	14.8119	15.3468	15.4701	NA	15.6948	16.7725	NA	16.2968	NA	NA	15.1815	15.3695	14.3608	NA	17.1012	15.5076	NA	15.1284	16.4727	NA	15.534
Cavin4_A2AMM0_S353_1	Cavin4	A2AMM0	S353	1	16.7055	16.8018	16.6141	16.9236	16.6304	16.456	16.5912	16.5704	16.8999	17.1735	16.6763	16.7522	16.7505	16.4854	17.046	16.8771	16.6144	16.4024	17.0935	17.2805	17.3396	17.0485	17.2104	17.6295	16.9624	17.3125	17.4666	17.4438	17.6639	17.6597	17.4041	17.5074	17.2338	17.6604	17.334	17.2967	17.5971	17.3834	16.2617	16.9365	16.2206	16.2359	16.7062	16.444	16.2873
Cavin4_A2AMM0_T334_1	Cavin4	A2AMM0	T334	1	24.6505	24.7357	24.9815	24.8984	24.4477	24.457	24.6965	24.2853	24.8396	24.8065	24.8145	24.7511	24.6988	24.8049	24.806	24.7921	24.7394	24.6018	24.7655	24.8619	24.7906	24.9733	24.8837	24.6896	24.7738	24.7047	24.6493	24.5554	24.7919	24.5397	25.0402	24.6829	24.8454	24.745	24.896	24.9045	24.665	24.9161	24.581	24.8965	24.4825	24.3863	24.7252	24.4168	24.4324
Cavin4_A2AMM0_S325_1	Cavin4	A2AMM0	S325	1	20.867	20.8883	20.9006	21.4254	20.8218	21.066	21.2346	21.0481	20.9625	21.1405	21.3685	21.218	21.0862	20.9659	21.0688	21.3121	21.1576	21.1687	20.656	20.876	21.4867	21.2931	20.9392	21.0551	20.61	21.1058	20.9034	20.812	21.1207	20.9702	21.1777	21.1506	21.2139	21.1029	21.1026	21.0842	21.2338	21.1087	21.6943	21.8122	21.601	21.328	21.4516	21.6323	21.0183
Cavin4_A2AMM0_T334_2	Cavin4	A2AMM0	T334	2	19.6058	20.0412	20.2436	20.367	19.6765	19.5749	20.0892	19.5061	19.9368	20.0332	20.2482	20.0061	20.0193	19.9416	20.0317	20.2031	20.0012	19.9777	19.7677	19.611	19.7529	20.0422	19.7375	19.7293	19.4578	19.5339	19.7463	19.7759	20.0693	19.9284	20.0438	20.1348	20.1882	20.0674	20.14	20.1096	20.1374	20.0055	21.2661	20.8711	20.5898	20.6231	20.9003	20.7128	20.3694
Cavin4_A2AMM0_S325_2	Cavin4	A2AMM0	S325	2	19.5181	20.0412	20.2436	20.367	19.6765	19.5749	20.0892	19.5061	19.9368	20.0332	20.1393	20.0061	19.9358	19.9306	20.0317	20.2031	20.0012	19.9777	19.7677	19.611	19.7529	20.0422	19.7196	19.7081	19.4578	19.5339	19.6691	19.7759	20.0673	19.8935	20.0438	20.1348	20.1882	20.0674	20.0836	20.038	20.0741	19.947	21.2661	20.8711	20.5898	20.6231	20.9003	20.7128	20.3694
Cavin4_A2AMM0_Y324_2	Cavin4	A2AMM0	Y324	2	15.5219	NA	NA	NA	NA	NA	NA	NA	NA	NA	16.4657	NA	15.8673	12.8918	NA	NA	NA	NA	NA	NA	NA	NA	13.3986	13.6325	NA	NA	15.4842	NA	10.5736	14.5401	NA	NA	NA	NA	15.433	15.7398	15.5943	15.3525	NA	NA	NA	NA	NA	NA	NA
Cavin4_A2AMM0_S362_1	Cavin4	A2AMM0	S362	1	NA	NA	NA	14.4037	NA	NA	NA	NA	NA	NA	NA	14.4623	NA	14.4936	NA	NA	16.5459	14.3886	NA	NA	NA	14.2048	NA	NA	14.3327	14.3664	NA	NA	NA	NA	NA	NA	NA	NA	NA	NA	NA	NA	NA	NA	13.7529	NA	NA	NA	NA
Cavin4_A2AMM0_S361_1	Cavin4	A2AMM0	S361	1	17.0605	16.9034	16.9721	16.8469	16.9562	17.0774	NA	NA	NA	NA	16.1278	NA	16.4377	NA	NA	16.7738	NA	17.0338	NA	NA	NA	NA	NA	NA	16.9143	NA	NA	NA	NA	16.9973	NA	16.9692	16.74	15.7996	17.3028	16.6981	16.6379	16.0971	NA	NA	NA	NA	NA	NA	NA
Cavin4_A2AMM0_T32_1	Cavin4	A2AMM0	T32	1	NA	NA	NA	NA	NA	NA	NA	NA	NA	11.3506	NA	12.1058	NA	NA	NA	NA	NA	14.1436	NA	NA	NA	NA	NA	NA	NA	12.1344	13.6948	13.5812	NA	NA	NA	NA	NA	NA	NA	NA	NA	NA	14.3126	13.6745	NA	12.2655	NA	NA	NA
Cavin4_A2AMM0_S202_1	Cavin4	A2AMM0	S202	1	14.6259	14.4864	14.7923	14.9943	14.0905	14.442	14.4038	14.7211	15.0305	14.9676	15.35	15.1469	15.3618	14.694	15.0742	15.6377	14.4809	14.9717	14.5871	14.8776	14.5925	15.0853	14.6139	14.215	14.6246	14.4642	14.5565	14.8558	15.1744	17.85	15.3809	14.7417	14.4904	16.1779	14.9688	14.4868	13.9286	15.4742	14.784	14.7071	13.04	13.4114	13.5282	13.2957	15.0839
Cavin4_A2AMM0_T212_1	Cavin4	A2AMM0	T212	1	16.9461	16.2284	15.6437	16.1165	15.672	16.0888	16.089	16.3104	16.1571	15.7681	15.9577	NA	16.1676	15.5235	16.2453	15.3698	16.5534	16.0482	15.8759	15.5917	15.9293	14.9939	NA	15.9929	16.4924	16.0809	15.5653	16.2303	15.2867	15.4008	15.7894	15.4174	15.6656	16.6265	15.9333	NA	15.5869	15.2692	15.6592	15.0396	15.3472	14.8136	15.2448	14.1943	15.158
Cavin4_A2AMM0_T209_1	Cavin4	A2AMM0	T209	1	NA	NA	NA	NA	NA	NA	NA	NA	NA	NA	NA	NA	NA	NA	NA	NA	NA	NA	NA	NA	NA	NA	NA	NA	NA	NA	NA	NA	NA	NA	NA	NA	NA	NA	NA	15.0849	NA	NA	NA	NA	NA	NA	NA	NA	NA
Cavin4_A2AMM0_S236_1	Cavin4	A2AMM0	S236	1	NA	NA	NA	NA	NA	NA	NA	NA	NA	16.0683	16.3787	NA	7.97556	NA	NA	16.028	14.931	NA	NA	NA	NA	NA	NA	NA	NA	NA	NA	NA	NA	NA	NA	15.937	15.9603	NA	14.8515	15.7407	NA	NA	NA	NA	NA	NA	NA	NA	NA
Cavin4_A2AMM0_S243_1	Cavin4	A2AMM0	S243	1	NA	NA	NA	NA	NA	NA	NA	NA	NA	16.0683	16.3787	NA	7.97556	NA	NA	16.028	14.931	NA	NA	NA	NA	NA	NA	NA	NA	NA	NA	NA	NA	NA	NA	15.937	15.9603	NA	14.8515	15.7407	NA	NA	NA	NA	NA	NA	NA	NA	NA
Cavin4_A2AMM0_S250_1	Cavin4	A2AMM0	S250	1	NA	NA	NA	NA	NA	NA	NA	NA	NA	16.0683	16.3787	NA	7.97556	NA	NA	16.028	14.931	NA	NA	NA	NA	NA	NA	NA	NA	NA	NA	NA	NA	NA	NA	15.937	15.9603	NA	14.8515	15.7407	NA	NA	NA	NA	NA	NA	NA	NA	NA
Cavin4_A2AMM0_S172_2	Cavin4	A2AMM0	S172	2	NA	NA	NA	NA	NA	NA	NA	NA	NA	NA	NA	NA	NA	NA	NA	NA	NA	17.9991	17.9977	NA	NA	NA	NA	NA	NA	15.9105	NA	NA	NA	NA	NA	NA	NA	NA	NA	NA	NA	NA	17.6076	NA	NA	NA	NA	NA	NA
Cavin4_A2AMM0_S171_2	Cavin4	A2AMM0	S171	2	NA	NA	NA	NA	NA	NA	NA	NA	NA	NA	NA	NA	NA	NA	NA	NA	NA	17.9991	17.9977	NA	NA	NA	NA	NA	NA	15.9105	NA	NA	NA	NA	NA	NA	NA	NA	NA	NA	NA	NA	17.6076	NA	NA	NA	NA	NA	NA
Ubr4_A2AN08_S619_1	Ubr4	A2AN08	S619	1	16.0646	16.8269	NA	16.9351	NA	NA	15.9466	NA	NA	16.634	NA	16.2228	NA	NA	NA	NA	NA	16.6198	NA	16.2928	15.8956	NA	NA	13.9514	NA	NA	NA	NA	NA	15.2671	16.0359	16.1315	16.1044	NA	15.6389	15.3326	14.6885	16.038	NA	15.6136	NA	15.9205	15.8599	16.2542	16.3112
Ubr4_A2AN08_S620_1	Ubr4	A2AN08	S620	1	15.3829	NA	16.5346	NA	15.7873	NA	16.3691	NA	15.9372	16.4107	NA	NA	16.4178	16.3396	NA	NA	NA	NA	16.2745	NA	14.5835	15.3576	NA	NA	15.7772	15.9401	NA	14.1474	NA	NA	NA	NA	13.319	NA	NA	NA	NA	NA	14.751	14.8564	16.2873	15.4451	15.3972	16.0383	15.6927
Ubr4_A2AN08_S2716_1	Ubr4	A2AN08	S2716	1	20.4198	20.5031	20.4476	20.4683	20.3144	20.517	NA	20.6774	20.7559	20.6458	20.7521	20.7003	20.7706	20.5989	20.5797	20.7006	20.7853	20.8338	20.5957	20.7287	20.7505	20.6142	20.5414	20.6304	NA	20.7591	20.5327	21.0066	20.7071	20.7365	20.5504	20.6475	20.8688	20.8542	20.5329	20.6635	20.7896	20.4821	19.7143	19.9178	19.8683	NA	19.8355	19.9776	19.8545
Ubr4_A2AN08_S2715_1	Ubr4	A2AN08	S2715	1	15.4729	15.4889	14.4208	15.7455	14.1573	14.6781	20.2	15.0235	15.8139	NA	14.343	14.4096	NA	13.9311	14.296	NA	NA	16.1174	15.2384	15.045	NA	15.2346	13.5005	13.5823	20.4107	15.6568	13.0536	14.8292	NA	14.6759	NA	NA	NA	13.2531	13.0079	14.9052	NA	14.4561	14.4546	15.0002	NA	19.1987	14.7562	14.1889	12.4052
Ubr4_A2AN08_S2715_2	Ubr4	A2AN08	S2715	2	16.0384	16.281	15.9656	16.2055	14.8558	11.0246	NA	NA	NA	NA	15.9437	12.1476	NA	NA	12.3534	15.4624	15.7546	15.4438	15.6336	16.3928	16.0079	NA	NA	11.7663	15.1533	NA	10.3509	14.9235	NA	NA	11.1363	10.8784	16.1777	11.3659	15.1338	11.143	15.3922	12.1341	15.8542	15.958	16.7754	16.0848	15.8299	16.2375	15.6012
Ubr4_A2AN08_T2712_2	Ubr4	A2AN08	T2712	2	16.0384	16.4263	16.9696	16.2055	14.7177	16.0528	14.558	15.401	16.1155	15.5593	16.7157	16.1037	15.8638	12.0459	14.6278	15.3046	15.7546	15.5244	15.8668	16.431	16.8882	15.6956	15.6537	14.6928	15.1533	14.9258	NA	14.8787	15.4155	15.5902	15.4617	16.1409	16.2663	15.1994	15.1338	15.4317	15.2405	NA	16.0268	15.9063	16.9084	16.2437	15.9018	16.3259	15.6012
Ubr4_A2AN08_S2716_2	Ubr4	A2AN08	S2716	2	NA	13.0428	15.9737	NA	11.4031	16.0963	14.558	15.401	16.1155	15.5593	16.6942	16.1938	15.8638	12.0459	14.8989	12.1909	NA	13.3977	13.1222	11.1713	15.7576	15.6956	15.6537	14.8711	NA	14.9258	10.3509	11.0228	15.4155	15.5902	15.532	16.178	12.1977	15.2972	9.90052	15.5037	12.6234	12.1341	12.8781	11.1314	13.4029	12.9816	12.9045	12.6253	NA
Ubr4_A2AN08_S2892_1	Ubr4	A2AN08	S2892	1	NA	14.8498	NA	NA	14.1884	NA	NA	NA	NA	15.8261	NA	NA	NA	NA	NA	14.87	NA	NA	NA	15.4976	15.4244	15.3259	NA	15.6366	15.4458	NA	NA	NA	NA	19.1006	14.7518	NA	NA	15.0009	14.6836	NA	NA	14.773	NA	NA	14.6472	NA	14.6639	NA	NA
Ubr4_A2AN08_S2897_1	Ubr4	A2AN08	S2897	1	NA	NA	16.9821	NA	NA	NA	NA	16.545	NA	NA	NA	15.876	13.1215	NA	18.2091	17.3094	15.2802	NA	NA	17.4621	NA	16.8048	NA	16.5384	18.8521	NA	NA	16.9353	15.9001	20.3478	NA	14.4895	NA	NA	13.5308	14.4342	15.545	NA	NA	17.9053	NA	19.4494	18.348	NA	NA
Ubr4_A2AN08_S2889_1	Ubr4	A2AN08	S2889	1	NA	NA	NA	15.7209	NA	15.6355	15.1853	15.635	15.3843	NA	15.2334	14.6375	15.4432	NA	15.5226	NA	15.142	15.9147	15.4777	NA	NA	NA	15.3093	NA	15.4717	15.3804	NA	15.6606	NA	NA	NA	15.5112	NA	15.1101	NA	15.471	15.5627	NA	NA	NA	NA	NA	NA	14.2924	NA
Ubr4_A2AN08_S2894_1	Ubr4	A2AN08	S2894	1	NA	NA	NA	NA	NA	NA	NA	NA	NA	NA	NA	NA	NA	NA	NA	NA	NA	NA	NA	NA	NA	NA	NA	NA	NA	NA	NA	NA	NA	NA	NA	NA	NA	NA	NA	NA	NA	NA	14.7839	NA	NA	14.3076	NA	NA	NA
Ubr4_A2AN08_S2901_1	Ubr4	A2AN08	S2901	1	NA	NA	NA	NA	NA	NA	NA	NA	NA	NA	NA	NA	NA	NA	NA	NA	NA	NA	NA	NA	NA	NA	NA	NA	NA	NA	NA	NA	NA	NA	NA	NA	NA	NA	NA	NA	NA	NA	NA	NA	NA	NA	NA	NA	NA
Ubr4_A2AN08_S2897_2	Ubr4	A2AN08	S2897	2	13.696	13.6768	13.3811	12.8699	13.3196	NA	NA	13.5856	13.4566	NA	13.8336	13.3149	13.6579	13.3443	13.1456	14.162	13.8854	NA	12.7506	13.9009	13.6219	13.0652	NA	NA	13.0901	13.9515	13.6972	12.5773	12.4885	12.7803	NA	13.5108	13.8327	NA	13.356	13.9224	13.6675	12.7798	13.9607	13.3951	13.1238	NA	NA	12.4918	13.8899
Ubr4_A2AN08_S2894_2	Ubr4	A2AN08	S2894	2	13.696	14.4451	13.3811	12.8699	13.3196	NA	NA	13.5856	13.4566	NA	14.5987	13.3149	13.6579	13.3443	13.1456	14.162	13.8854	13.6436	NA	13.9009	13.6219	13.0652	NA	13.4335	12.7625	13.9515	13.6972	12.5773	12.4885	12.7803	NA	13.5108	13.8327	NA	13.356	13.9224	14.2458	12.7798	13.9607	13.3951	13.1238	NA	NA	12.4918	13.8899
Ubr4_A2AN08_S2892_2	Ubr4	A2AN08	S2892	2	NA	13.1691	NA	NA	NA	NA	NA	NA	NA	NA	13.3179	NA	NA	NA	NA	NA	NA	NA	12.7506	NA	NA	NA	NA	13.4335	13.9356	NA	NA	NA	NA	NA	NA	NA	NA	NA	12.9254	NA	12.6473	NA	NA	NA	NA	NA	NA	NA	NA
Ubr4_A2AN08_S2889_2	Ubr4	A2AN08	S2889	2	NA	NA	NA	NA	NA	NA	NA	NA	NA	NA	NA	NA	NA	NA	NA	NA	NA	13.6436	NA	NA	NA	NA	NA	NA	NA	NA	NA	NA	NA	NA	NA	NA	NA	NA	12.9254	NA	NA	NA	NA	NA	NA	NA	NA	NA	NA
Ubr4_A2AN08_S2907_1	Ubr4	A2AN08	S2907	1	NA	NA	NA	NA	14.1689	NA	NA	NA	NA	NA	NA	NA	NA	NA	NA	NA	NA	NA	NA	15.1208	NA	NA	NA	NA	NA	NA	NA	NA	NA	NA	NA	NA	NA	NA	NA	NA	NA	NA	NA	NA	NA	NA	NA	NA	NA
Ubr4_A2AN08_T2721_1	Ubr4	A2AN08	T2721	1	18.5656	18.5015	18.2559	18.2294	18.3949	18.377	18.0465	18.3248	18.2349	17.8436	17.8651	18.1962	18.1517	18.151	17.7449	17.8587	18.2896	18.6818	18.4359	18.3098	18.1357	18.0467	17.8595	17.6692	18.2232	18.2216	18.123	17.985	17.8474	18.3549	18.0839	18.1684	18.1335	18.1191	18.0521	18.1531	17.9445	18.1465	17.3848	17.3365	17.251	17.0393	17.3854	17.3995	17.3253
Ubr4_A2AN08_S2740_1	Ubr4	A2AN08	S2740	1	14.3183	14.2363	13.9062	14.1468	14.2992	14.6197	14.3399	NA	NA	14.4486	NA	14.6769	14.9299	NA	13.8911	NA	14.8843	15.1146	12.954	13.0318	13.9916	13.1971	13.933	NA	13.176	14.3897	13.8063	14.3187	NA	14.3673	13.0929	14.2959	14.7026	14.4217	13.4624	14.5359	14.815	13.433	11.774	12.3201	13.7501	13.3218	8.63987	14.3906	13.5756
Ubr4_A2AN08_S2741_1	Ubr4	A2AN08	S2741	1	NA	14.5871	12.9627	NA	NA	14.2322	NA	14.4685	15.529	13.2312	15.2378	14.6218	14.6315	14.4967	NA	15.0445	14.9646	NA	11.7364	13.4496	NA	14.2034	13.5568	14.9825	14.081	13.9527	13.8897	14.6243	14.736	NA	11.9292	13.9012	14.5751	14.5173	13.5594	14.2114	14.9801	NA	13.3486	NA	14.2737	13.1564	13.5377	15.2149	14.6675
Ubr4_A2AN08_S181_1	Ubr4	A2AN08	S181	1	14.422	13.8857	14.1373	14.1092	13.8853	NA	14.1999	14.6644	14.5674	14.5605	14.9539	14.4252	14.6823	14.6797	14.5923	13.8182	14.5466	14.7307	14.3848	14.5961	14.2276	14.2856	14.519	14.5616	NA	14.247	13.8107	14.3264	14.8173	14.4483	14.5399	14.9413	14.5675	14.6034	14.3857	14.7291	13.7706	14.4537	13.696	13.159	13.709	13.0938	NA	14.1055	13.0714
Ubr4_A2AN08_S178_1	Ubr4	A2AN08	S178	1	12.6776	11.9668	NA	13.6505	12.9061	NA	12.4284	NA	11.9493	NA	NA	NA	13.5685	NA	NA	NA	13.2673	13.2432	NA	NA	12.3711	13.6458	NA	NA	12.3677	NA	12.4481	13.0925	NA	NA	NA	NA	NA	NA	NA	9.5542	NA	NA	12.7212	NA	NA	NA	NA	NA	NA
Ubr4_A2AN08_S2719_2	Ubr4	A2AN08	S2719	2	NA	-0.904709	NA	NA	NA	NA	NA	NA	NA	NA	15.6633	NA	NA	NA	NA	NA	NA	NA	NA	NA	NA	NA	NA	NA	NA	NA	NA	NA	NA	NA	NA	NA	NA	NA	9.90052	NA	NA	NA	NA	NA	NA	NA	NA	NA	NA
Ubr4_A2AN08_T2721_3	Ubr4	A2AN08	T2721	3	18.1918	17.2254	17.5252	17.6296	17.2628	17.2043	9.2804	16.4948	17.0818	9.56361	17.6491	16.0145	11.4386	15.4687	17.8916	17.3929	17.3289	18.0046	17.0966	17.2571	17.4233	16.9731	13.3812	14.3357	16.9705	17.7677	17.2386	15.1899	17.9565	NA	17.8916	NA	NA	17.7119	18.0742	NA	NA	17.7458	17.0468	13.8269	16.0415	NA	15.6257	NA	NA
Ubr4_A2AN08_S2719_3	Ubr4	A2AN08	S2719	3	18.1918	17.2303	17.5252	17.3403	17.2628	17.2164	9.81501	16.5168	17.0045	6.24663	17.8747	16.0145	12.263	16.1976	17.5281	17.4091	17.3289	18.0046	16.6803	17.6015	17.3387	17.027	13.3812	15.339	17.0429	17.6515	17.1928	15.1899	17.9565	13.9488	17.8773	NA	9.43404	17.7138	17.7927	NA	NA	17.7403	17.87	13.7601	16.2371	NA	15.6257	12.5112	NA
Ubr4_A2AN08_S2716_3	Ubr4	A2AN08	S2716	3	16.7132	12.6409	16.7213	16.2685	NA	12.9455	10.1993	16.4463	13.7425	9.56361	15.0866	8.88734	12.8296	16.236	15.9276	14.5907	NA	16.6909	15.1004	16.8281	16.15	13.4086	NA	14.5332	16.4288	14.587	12.2369	NA	15.1532	13.9488	12.2877	NA	9.43404	8.13035	15.7101	NA	NA	9.69638	17.4638	11.3002	16.5833	NA	16.0624	12.5112	NA
Ubr4_A2AN08_T2712_3	Ubr4	A2AN08	T2712	3	NA	NA	11.2666	15.0956	NA	11.4417	8.10281	10.8769	NA	NA	NA	8.88734	10.9986	NA	12.01	15.9785	NA	NA	NA	12.2195	NA	12.5463	13.3812	NA	13.0367	NA	NA	NA	NA	NA	NA	NA	NA	NA	12.1922	NA	NA	NA	15.668	8.8542	NA	NA	NA	NA	NA
Ubr4_A2AN08_S2715_3	Ubr4	A2AN08	S2715	3	17.5506	17.2254	16.3837	16.9395	17.2628	17.2063	9.11332	13.5436	17.0818	9.41106	17.8747	16.0247	12.2353	15.0473	17.9242	16.957	17.3289	17.262	17.0966	17.1283	16.8266	17.0902	NA	15.3893	16.0994	17.7662	17.2386	15.1899	17.7334	13.9488	17.8916	NA	9.43404	17.7138	18.0985	NA	NA	17.7458	17.7847	13.8728	15.6577	NA	15.1256	12.5112	NA
Ubr4_A2AN08_S1759_1	Ubr4	A2AN08	S1759	1	NA	NA	NA	NA	NA	NA	NA	NA	NA	NA	NA	NA	NA	NA	NA	12.304	NA	NA	NA	NA	NA	NA	NA	NA	NA	NA	NA	NA	NA	NA	NA	NA	NA	11.9786	NA	11.0812	NA	NA	NA	NA	NA	NA	NA	NA	NA
Ubr4_A2AN08_S1761_1	Ubr4	A2AN08	S1761	1	NA	NA	NA	13.2841	NA	NA	NA	NA	NA	NA	NA	13.165	NA	NA	NA	NA	NA	NA	NA	NA	NA	NA	NA	13.108	NA	13.4948	NA	NA	NA	NA	NA	14.0355	12.7314	NA	NA	NA	NA	13.6434	NA	NA	NA	NA	NA	NA	NA
Ubr4_A2AN08_T1760_1	Ubr4	A2AN08	T1760	1	NA	NA	NA	NA	NA	NA	NA	13.1469	12.7445	NA	12.8632	NA	NA	12.5906	12.2581	NA	NA	NA	NA	NA	NA	NA	NA	NA	NA	NA	NA	NA	NA	NA	NA	NA	NA	NA	NA	NA	NA	NA	NA	NA	NA	NA	NA	NA	NA
Mdn1_A2ANY6_S4827_1	Mdn1	A2ANY6	S4827	1	15.8758	16.1012	16.0574	16.1038	16.0095	16.1169	15.7877	15.8469	16.1188	15.9599	15.5863	15.7164	15.6672	15.916	15.9131	15.8448	15.7301	15.7752	16.0817	16.306	16.4462	16.0378	16.006	16.202	16.0966	16.2578	16.5991	16.5204	16.2742	16.4158	15.9841	15.8128	15.4895	16.3339	16.0146	15.7851	15.413	16.1963	16.0849	16.0887	15.7409	16.0668	15.8359	16.0275	15.9369
Mdn1_A2ANY6_S4749_2	Mdn1	A2ANY6	S4749	2	15.9044	14.6203	14.7566	14.7482	16.01	14.6322	14.4927	14.6188	15.8965	13.8956	13.673	12.903	13.9461	14.602	14.4882	13.867	13.7364	15.1117	14.2345	14.6786	14.6508	14.0954	14.7351	14.0129	14.8676	14.9199	14.516	15.3155	14.3929	14.0595	14.1686	14.144	13.7528	13.6919	13.7358	13.8293	13.3619	15.1363	15.0734	14.5433	14.0582	14.4	14.048	14.0364	14.5026
Mdn1_A2ANY6_S4747_2	Mdn1	A2ANY6	S4747	2	15.9044	14.6203	14.7566	14.7482	16.01	14.6322	14.4927	14.6188	15.8965	13.8956	13.673	12.903	13.9461	14.602	14.4882	13.867	13.7364	15.1117	14.2345	14.6786	14.6508	14.0954	14.7351	14.0129	14.8676	14.9199	14.516	15.3155	14.3929	14.0595	14.1686	14.144	13.7528	13.6919	13.7358	13.8293	13.3619	15.1363	15.0734	14.5433	14.0582	14.4	14.048	14.0364	14.5026
Mdn1_A2ANY6_S4747_1	Mdn1	A2ANY6	S4747	1	NA	13.9287	NA	11.7954	NA	12.5371	NA	NA	13.981	NA	12.4775	12.4612	12.6081	NA	NA	13.1298	12.0664	NA	NA	11.5161	12.9019	13.1809	NA	NA	NA	11.9744	13.15	11.4147	NA	14.0524	12.6106	13.1716	12.5286	13.2979	12.7155	12.627	12.7197	12.8762	NA	10.5347	12.5416	NA	NA	NA	13.2413
Fmnl2_A2APV2_S171_1	Fmnl2	A2APV2	S171	1	17.217	17.2023	17.4246	17.8998	16.8082	16.4825	16.7765	17.3104	17.5142	17.624	17.0783	17.2061	17.2783	17.0181	17.5789	17.1344	16.7788	16.9966	18.0968	17.6755	17.8345	17.4153	17.406	17.3189	18.009	17.1999	17.0255	17.4358	17.0687	17.7936	17.4258	16.8242	16.7746	17.1037	17.0866	17.6112	17.371	17.4145	16.5866	16.5897	16.697	16.6999	16.269	16.4666	16.6001
Tubb1_A2AQ07_S435_1	Tubb1	A2AQ07	S435	1	15.6354	14.557	NA	16.7607	14.3786	16.596	15.5546	15.2472	15.9612	15.0752	15.6072	NA	NA	15.2895	15.1132	NA	12.4776	15.1194	NA	NA	NA	NA	NA	NA	NA	NA	NA	NA	NA	NA	NA	NA	NA	NA	NA	NA	NA	NA	14.5172	14.9274	15.1342	14.9413	NA	15.8389	15.2285
Rtf1_A2AQ19_S337_3	Rtf1	A2AQ19	S337	3	NA	NA	NA	NA	NA	NA	NA	NA	NA	NA	NA	NA	NA	NA	NA	NA	NA	NA	NA	NA	NA	NA	NA	NA	NA	NA	NA	NA	NA	NA	NA	NA	NA	NA	NA	NA	NA	NA	NA	NA	NA	NA	NA	NA	NA
Rtf1_A2AQ19_S336_3	Rtf1	A2AQ19	S336	3	NA	NA	NA	NA	NA	NA	NA	NA	NA	NA	NA	NA	NA	NA	NA	NA	NA	NA	NA	NA	NA	NA	NA	NA	NA	NA	NA	NA	NA	NA	NA	NA	NA	NA	NA	NA	NA	NA	NA	NA	NA	NA	NA	NA	NA
Skt_A2AQ25_S1902_1	Skt	A2AQ25	S1902	1	NA	17.7051	17.901	NA	17.7538	17.8075	18.199	NA	18.0517	18.089	17.9322	NA	17.9881	NA	18.073	18.0748	18.0426	18.0713	17.7534	18.1304	18.156	18.0876	17.5883	18.1402	18.0039	17.9947	18.2135	17.8327	17.7163	17.6771	18.3454	NA	18.3146	18.0374	NA	18.3127	NA	NA	18.1478	NA	NA	18.0651	18.4274	NA	NA
Skt_A2AQ25_S1899_1	Skt	A2AQ25	S1899	1	NA	NA	NA	17.895	NA	NA	NA	17.9235	NA	NA	NA	17.9856	NA	18.0704	17.8885	NA	NA	NA	NA	NA	NA	NA	NA	NA	NA	NA	NA	NA	NA	NA	NA	18.0822	18.1361	17.8775	18.1931	18.1505	18.0533	18.0668	NA	18.3691	18.0517	NA	NA	17.9746	18.0598
Skt_A2AQ25_S1905_1	Skt	A2AQ25	S1905	1	17.5535	17.8076	17.8993	17.5807	NA	NA	17.4912	17.653	NA	17.523	17.8162	NA	17.6762	17.7291	17.4515	17.6018	NA	17.9957	NA	17.5457	NA	17.6851	NA	17.7085	17.802	NA	NA	NA	17.9033	17.0026	17.5465	NA	17.5908	17.5579	17.6485	NA	17.3978	NA	17.5673	NA	17.8011	17.5755	17.7358	17.8252	17.7202
Skt_A2AQ25_S1908_1	Skt	A2AQ25	S1908	1	NA	NA	17.8993	NA	17.6452	NA	NA	NA	NA	NA	NA	NA	NA	NA	NA	NA	NA	NA	17.3366	NA	17.6876	NA	NA	NA	NA	NA	NA	NA	NA	17.0093	NA	NA	NA	NA	17.5833	NA	NA	17.6682	NA	NA	17.8011	NA	NA	NA	NA
Skt_A2AQ25_T1907_1	Skt	A2AQ25	T1907	1	NA	NA	NA	NA	NA	NA	NA	NA	NA	NA	NA	NA	NA	NA	NA	NA	NA	NA	NA	NA	16.4979	16.5172	NA	NA	NA	16.527	16.3705	16.2239	NA	NA	NA	NA	NA	NA	NA	NA	NA	NA	NA	16.4876	NA	16.1335	NA	NA	NA
Skt_A2AQ25_S1902_2	Skt	A2AQ25	S1902	2	15.4771	15.6205	16.7117	15.772	15.321	15.5384	11.228	15.7013	15.5615	NA	16.9582	16.9454	16.1304	16.7881	15.3415	16.32	16.0977	16.3402	16.0797	14.8295	16.438	15.6747	NA	17.1079	15.5121	16.7813	15.5985	15.3338	16.9331	16.2531	16.9705	17.2037	16.9951	15.9599	16.1334	16.1445	15.6618	NA	10.6133	16.1558	15.917	15.973	16.0615	16.1047	16.2743
Skt_A2AQ25_S1899_2	Skt	A2AQ25	S1899	2	NA	NA	15.9905	NA	NA	NA	NA	NA	NA	NA	15.948	15.6937	16.1304	16.1826	NA	NA	16.0977	NA	NA	14.8295	15.197	NA	15.7636	15.9764	15.5121	15.7303	NA	NA	16.9387	NA	15.8893	16.1052	15.9466	NA	NA	NA	15.6618	NA	NA	NA	NA	15.973	NA	NA	16.2743
Skt_A2AQ25_S1905_2	Skt	A2AQ25	S1905	2	15.4771	15.6205	15.3659	15.772	15.321	15.5384	11.228	15.7013	15.5615	NA	15.9682	16.1597	NA	15.2435	15.3415	16.32	NA	16.3402	16.0797	NA	15.6445	15.6747	15.7636	16.2285	NA	15.8306	15.5985	15.3338	17.0455	16.2531	16.0473	16.296	16.042	15.9599	16.1334	16.1445	NA	NA	10.6133	16.1558	15.917	NA	16.0615	16.1047	NA
Skt_A2AQ25_S361_1	Skt	A2AQ25	S361	1	20.1883	20.2697	20.0077	19.9075	19.8233	19.748	19.6089	19.4448	20.065	20.3748	20.4616	20.6451	20.3547	19.8479	19.9875	20.0075	19.964	20.4481	20.4725	20.5612	20.092	19.9891	20.1584	19.9425	19.9034	19.7259	19.621	19.5463	20.4099	20.7364	20.6606	20.8387	20.8876	20.2194	20.2849	20.284	20.3075	20.1838	20.1923	20.5766	20.5313	20.1028	20.0762	19.9334	19.9097
Skt_A2AQ25_S361_2	Skt	A2AQ25	S361	2	17.3501	17.7844	17.3552	17.544	18.6499	18.738	18.8501	18.7751	17.064	16.1615	16.0822	18.2542	17.2671	18.4064	18.1292	17.9219	17.7665	18.5987	17.3636	17.6151	17.558	17.4948	18.1142	18.7928	18.701	18.6119	18.6963	19.2172	17.989	17.9595	17.4797	17.802	16.4077	18.245	18.2254	18.3267	18.391	18.2053	18.4105	18.2427	18.04	18.0772	19.5084	19.4458	19.7108
Skt_A2AQ25_S359_2	Skt	A2AQ25	S359	2	15.6259	16.6306	16.5763	16.9886	18.1323	18.7207	18.2939	18.7603	15.7855	16.1615	16.0822	17.384	17.6206	17.9723	18.1292	17.9219	17.7665	18.0502	15.9253	16.6001	16.5154	16.1488	17.703	18.4048	18.2937	18.1242	18.7222	18.8348	16.8501	16.5833	16.28	17.1439	16.4077	18.245	18.2254	18.3267	18.391	18.2053	17.4909	17.0461	15.6517	16.3803	19.0338	18.9138	18.8186
Skt_A2AQ25_S363_2	Skt	A2AQ25	S363	2	NA	NA	16.5344	15.9696	NA	NA	NA	NA	NA	NA	NA	16.9387	15.6806	NA	NA	NA	NA	NA	11.9875	NA	NA	NA	17.2849	NA	NA	NA	NA	17.1513	NA	NA	NA	16.1388	NA	NA	NA	NA	NA	NA	NA	NA	NA	NA	NA	NA	17.505
Skt_A2AQ25_S365_2	Skt	A2AQ25	S365	2	16.8301	16.9234	14.6082	16.9343	16.9199	17.9211	17.2057	18.1461	16.2973	NA	NA	17.81	17.5384	16.4622	NA	NA	NA	16.938	16.6431	16.6298	16.5994	16.7737	17.648	16.7086	16.6775	16.8101	17.9382	18.1632	17.1158	17.2576	16.6551	17.25	NA	NA	NA	NA	NA	NA	17.3253	17.4156	17.7342	17.5451	17.6737	17.7487	17.6783
Skt_A2AQ25_T470_1	Skt	A2AQ25	T470	1	17.2447	17.4312	17.2251	17.2206	17.5164	17.633	17.4565	17.4513	17.2739	17.1711	17.1961	17.0893	17.2748	17.6227	17.5944	17.5517	18.017	17.6164	17.1133	17.4841	17.6246	17.6844	17.3476	17.5372	17.6676	17.7545	18.0905	17.9094	17.1537	17.8056	17.6985	17.6569	17.2279	18.2832	17.8944	17.7595	17.4605	17.9126	16.7034	16.8263	17.1069	17.0404	17.1031	16.9943	17.0455
Skt_A2AQ25_S474_2	Skt	A2AQ25	S474	2	16.6186	17.452	17.1439	17.1793	18.4865	18.2473	18.4239	18.597	17.3669	17.142	17.4488	17.7399	17.5288	18.0012	18.4459	18.6738	18.4725	18.6277	17.2035	17.2066	16.6968	17.5111	16.7254	18.5621	18.8608	18.5136	18.6967	19.1333	17.4644	17.6674	17.9849	17.6346	17.0165	18.4476	18.9372	18.9315	18.6678	19.0355	17.5135	17.4303	16.6045	17.3563	18.8484	18.2662	18.6246
Skt_A2AQ25_T470_2	Skt	A2AQ25	T470	2	16.6186	17.452	17.1439	17.1793	18.2967	18.2473	18.4239	18.597	17.3669	17.0763	17.4488	17.7399	17.5288	18.0012	18.4459	18.6067	18.4725	18.6277	17.2035	17.1817	16.6968	17.5111	16.7254	18.5621	18.8608	18.4134	18.6967	19.1333	17.4644	17.6674	17.8402	17.6346	17.0165	18.4476	18.9372	18.9315	18.6678	19.0355	17.4721	17.4303	16.6045	17.3563	18.8484	18.2662	18.6246
Skt_A2AQ25_S1049_1	Skt	A2AQ25	S1049	1	17.8289	16.8141	17.3809	18.3389	18.1944	17.7716	18.2244	18.433	18.3417	17.4949	18.4591	17.9626	18.24	18.2422	18.2375	18.4097	18.6897	17.2891	17.6509	17.5691	18.5893	18.7806	18.4555	18.6911	18.3548	18.1614	18.6409	18.7685	18.6063	18.9658	18.3716	18.687	18.2258	19.2233	18.5972	18.4398	18.3234	18.4908	17.8811	17.4289	16.9546	16.9384	17.8441	17.5424	17.8643
Skt_A2AQ25_S357_1	Skt	A2AQ25	S357	1	15.6294	15.6093	15.7259	16.2784	NA	15.2655	15.6879	15.7237	16.0514	16.1307	16.1766	16.4103	16.2051	15.5513	15.6342	16.1435	16.1632	16.0648	16.0777	15.7339	15.9843	15.8117	16.0551	15.9579	15.4171	15.6414	15.8842	15.9436	16.146	16.2653	16.2944	16.4966	16.2667	16.2725	16.0486	15.7112	15.8331	16.3058	15.0291	15.6078	15.5613	15.2713	15.5557	15.2697	15.3567
Skt_A2AQ25_S353_1	Skt	A2AQ25	S353	1	15.3953	14.8618	14.8376	14.5891	16.3195	16.0331	16.2941	16.0595	15.1998	14.2193	15.3244	14.4807	15.1713	16.052	15.3919	15.173	15.4258	15.6992	15.1359	15.077	15.0119	14.9945	15.0973	15.721	16.0918	15.9429	15.2029	15.5754	14.9793	14.8616	14.7713	15.0418	15.3954	15.509	15.3749	15.9938	16.358	15.3956	15.0885	14.2987	14.8564	14.6218	14.7911	15.5682	15.1779
Skt_A2AQ25_S1762_1	Skt	A2AQ25	S1762	1	15.6149	15.125	15.7791	15.5615	14.9556	15.116	14.9378	15.3961	15.4567	14.5523	15.7832	14.8333	15.4828	15.5673	15.5788	15.4752	15.0466	15.7388	15.5759	15.5064	15.6413	15.9315	15.4222	15.6653	15.9918	15.3867	15.6508	15.6203	15.5001	15.8578	15.3105	14.7047	14.2644	15.2683	15.4555	15.0835	14.2214	15.2274	15.5994	15.0908	15.3268	15.4034	15.0635	14.3623	14.6752
Skt_A2AQ25_T1795_1	Skt	A2AQ25	T1795	1	NA	NA	NA	15.0918	NA	NA	14.8264	NA	NA	NA	NA	NA	NA	NA	NA	NA	NA	NA	NA	NA	NA	NA	NA	NA	NA	NA	NA	NA	NA	NA	NA	NA	NA	NA	NA	NA	NA	NA	NA	NA	NA	NA	NA	NA	NA
Skt_A2AQ25_S1798_1	Skt	A2AQ25	S1798	1	16.1849	NA	16.4877	16.2843	16.2023	16.1288	NA	16.266	16.2282	16.1887	16.6806	NA	16.5723	16.5638	NA	NA	16.3778	NA	NA	16.6161	15.5326	16.898	NA	16.5085	NA	15.1119	15.2149	NA	NA	16.6794	NA	NA	16.5898	16.5546	16.5131	16.5034	16.4229	16.6529	17.0708	17.0369	16.8894	16.088	14.6593	16.303	16.3549
Skt_A2AQ25_S1796_1	Skt	A2AQ25	S1796	1	NA	16.7047	15.3747	NA	14.7646	14.8195	15.9979	15.2365	15.4277	15.1518	15.4767	14.9194	15.2977	17.0702	15.3238	15.4303	15.0823	17.0972	16.9174	15.1573	17.2437	15.6115	15.0853	15.1729	17.0824	NA	16.3569	16.8307	17.1089	15.2802	16.9688	16.602	15.4577	15.2	15.1716	14.9299	15.3163	14.7493	NA	NA	NA	NA	NA	14.3117	NA
Skt_A2AQ25_S869_1	Skt	A2AQ25	S869	1	16.5567	16.5924	16.1137	16.0166	16.6494	15.9833	NA	16.3841	NA	NA	NA	16.5426	16.3225	NA	16.1133	16.4378	16.4348	16.9279	16.0408	16.2238	16.0584	16.2128	16.1037	16.3108	16.9381	16.2687	16.3187	NA	NA	16.4851	16.2361	16.2851	16.2388	NA	16.1024	16.1096	16.2516	16.4938	NA	14.729	15.5279	15.2738	NA	14.3238	NA
Skt_A2AQ25_S866_1	Skt	A2AQ25	S866	1	NA	NA	NA	14.9802	NA	NA	15.0534	NA	16.3576	NA	NA	NA	NA	NA	NA	NA	NA	NA	NA	14.933	NA	14.286	14.0742	NA	NA	NA	14.1334	14.9612	14.495	14.6709	13.9833	NA	14.426	14.7846	14.9735	14.4504	13.9366	14.6942	15.8882	NA	NA	NA	NA	NA	NA
Skt_A2AQ25_T867_1	Skt	A2AQ25	T867	1	NA	NA	15.0834	NA	NA	14.9058	16.1412	NA	NA	NA	NA	NA	NA	15.1627	NA	15.1435	NA	NA	14.8392	NA	NA	NA	NA	14.4305	NA	14.9146	NA	16.4198	16.5799	NA	NA	NA	NA	16.4557	NA	NA	NA	NA	NA	16.0066	14.3567	14.4311	16.1956	15.7529	15.5157
Skt_A2AQ25_S1732_1	Skt	A2AQ25	S1732	1	NA	NA	NA	NA	NA	NA	NA	NA	NA	NA	15.6218	NA	NA	NA	NA	NA	NA	15.5709	NA	15.8627	NA	NA	NA	NA	NA	NA	NA	NA	NA	NA	NA	NA	NA	NA	15.8597	NA	NA	NA	NA	NA	NA	14.2374	NA	NA	NA
Skt_A2AQ25_S1734_1	Skt	A2AQ25	S1734	1	NA	NA	NA	NA	NA	NA	NA	NA	NA	NA	NA	NA	NA	NA	NA	NA	NA	14.5438	NA	NA	NA	NA	NA	NA	NA	NA	NA	NA	NA	NA	NA	15.1185	NA	NA	16.0156	NA	NA	NA	15.3478	NA	NA	NA	14.8807	NA	NA
Skt_A2AQ25_T1731_1	Skt	A2AQ25	T1731	1	14.6526	14.1604	NA	14.5892	15.128	14.8462	15.2042	NA	15.5359	NA	NA	15.2067	15.4404	NA	14.7422	NA	NA	NA	15.5325	NA	15.5687	15.3376	15.4986	NA	NA	NA	15.6503	15.4495	14.8924	15.2861	15.8874	NA	14.7595	15.3174	15.7468	15.5533	14.9963	15.7023	NA	14.3866	15.093	NA	NA	14.7747	14.5037
Skt_A2AQ25_S326_2	Skt	A2AQ25	S326	2	12.8807	16.2106	NA	15.6562	NA	16.4173	NA	NA	NA	NA	NA	19.2948	NA	NA	NA	NA	16.5762	NA	NA	NA	NA	NA	13.2729	NA	NA	NA	16.5493	NA	NA	NA	NA	16.2677	NA	NA	NA	17.0168	NA	NA	NA	NA	NA	16.0149	NA	NA	NA
Skt_A2AQ25_S313_2	Skt	A2AQ25	S313	2	16.4382	17.1409	16.1992	16.2129	17.2225	16.6606	17.1718	17.2054	NA	NA	16.204	19.6318	16.5617	16.4583	15.8644	NA	NA	17.366	16.9761	16.3098	NA	14.718	NA	NA	16.8022	NA	NA	14.8493	14.8866	17.6031	NA	16.2677	13.3556	16.532	NA	17.7641	17.9404	17.2615	16.292	17.9197	NA	NA	17.8465	17.0037	NA
Skt_A2AQ25_S313_1	Skt	A2AQ25	S313	1	17.3623	17.4101	17.5054	17.5815	17.4357	17.7511	17.4102	17.7219	17.6112	17.3027	17.5437	17.7716	17.8808	17.6745	17.4014	17.7112	17.2107	17.7796	17.5379	17.5757	17.9124	17.7602	17.4327	17.6797	17.5292	17.7682	NA	17.5758	17.7055	17.3319	17.7516	17.9771	18.0137	16.7537	17.866	17.8766	17.9006	17.6005	17.5581	17.4771	17.2237	17.1054	17.1836	16.7475	16.6232
Skt_A2AQ25_S322_2	Skt	A2AQ25	S322	2	NA	15.5989	NA	16.5983	NA	NA	NA	NA	NA	NA	NA	NA	NA	NA	NA	NA	NA	NA	NA	NA	NA	NA	NA	NA	NA	NA	16.5493	NA	NA	NA	NA	NA	NA	NA	NA	NA	NA	NA	14.9427	NA	NA	NA	NA	NA	NA
Skt_A2AQ25_S316_2	Skt	A2AQ25	S316	2	17.4314	17.1409	16.1992	14.7927	17.2225	16.5205	17.1718	17.053	NA	NA	NA	18.5113	16.5617	16.4583	15.8644	NA	NA	18.0681	16.9761	16.3098	NA	14.7179	NA	NA	16.8022	15.4656	NA	16.6502	NA	18.5187	NA	NA	NA	17.0969	17.0799	17.7641	17.7855	17.2615	17.559	17.9197	17.179	NA	17.8465	16.6106	14.3016
Skt_A2AQ25_S302_1	Skt	A2AQ25	S302	1	10.0531	NA	10.0954	NA	NA	NA	NA	NA	NA	NA	NA	NA	NA	NA	NA	NA	NA	NA	NA	NA	NA	NA	NA	NA	NA	NA	NA	NA	NA	NA	NA	NA	NA	NA	NA	NA	NA	NA	NA	NA	NA	NA	NA	17.2152	10.5586
Skt_A2AQ25_T317_2	Skt	A2AQ25	T317	2	16.5433	NA	NA	NA	NA	16.5672	NA	13.8867	NA	NA	16.204	17.6414	NA	NA	NA	NA	16.3222	16.6922	NA	NA	NA	NA	NA	NA	NA	15.4656	NA	17.0142	14.8866	17.9299	NA	NA	13.3556	16.4293	17.08	17.0168	14.6443	NA	17.5937	NA	17.179	16.0149	NA	14.9359	14.3016
Skt_A2AQ25_S328_2	Skt	A2AQ25	S328	2	NA	14.6777	NA	NA	NA	NA	NA	NA	NA	NA	NA	NA	NA	NA	NA	NA	13.9454	NA	NA	NA	NA	NA	NA	NA	NA	NA	NA	NA	NA	NA	NA	NA	NA	NA	NA	NA	NA	NA	NA	NA	NA	NA	NA	NA	NA
Skt_A2AQ25_S326_3	Skt	A2AQ25	S326	3	NA	NA	NA	NA	NA	NA	NA	NA	NA	NA	NA	NA	NA	13.6206	NA	15.31	NA	NA	15.1944	NA	NA	NA	15.3694	15.9597	NA	NA	NA	NA	15.8712	NA	13.2858	NA	NA	14.4927	NA	NA	15.9826	NA	NA	NA	NA	NA	NA	NA	NA
Skt_A2AQ25_S322_3	Skt	A2AQ25	S322	3	NA	11.9212	NA	NA	12.9087	NA	NA	NA	NA	NA	NA	NA	13.4368	14.0212	NA	15.46	NA	NA	15.1944	NA	NA	NA	15.3694	15.9597	NA	NA	13.7705	NA	15.8712	NA	13.2858	NA	NA	14.4927	14.7081	NA	15.9826	NA	NA	NA	NA	NA	NA	NA	NA
Skt_A2AQ25_S313_3	Skt	A2AQ25	S313	3	NA	11.9212	NA	NA	12.9087	NA	NA	NA	NA	NA	NA	NA	13.4368	14.0212	NA	15.46	NA	NA	15.1944	NA	NA	NA	15.3694	15.9597	NA	NA	13.7705	NA	15.8712	NA	13.2858	NA	NA	14.4927	14.7081	NA	15.9826	NA	NA	NA	NA	NA	NA	NA	NA
Skt_A2AQ25_T317_3	Skt	A2AQ25	T317	3	NA	11.9212	NA	NA	12.9087	NA	NA	NA	NA	NA	NA	NA	13.4368	14.8348	NA	12.1197	NA	NA	NA	NA	NA	NA	NA	NA	NA	NA	13.7705	NA	NA	NA	NA	NA	NA	NA	14.7081	NA	NA	NA	NA	NA	NA	NA	NA	NA	NA
Skt_A2AQ25_S316_3	Skt	A2AQ25	S316	3	NA	NA	NA	NA	NA	NA	NA	NA	NA	NA	NA	NA	NA	13.6206	NA	NA	NA	NA	NA	NA	NA	NA	NA	NA	NA	NA	NA	NA	NA	NA	NA	NA	NA	NA	NA	NA	NA	NA	NA	NA	NA	NA	NA	NA	NA
Skt_A2AQ25_T317_1	Skt	A2AQ25	T317	1	NA	12.9958	NA	NA	12.9182	NA	NA	NA	NA	NA	NA	NA	NA	NA	NA	NA	NA	NA	NA	13.5642	NA	NA	NA	NA	12.8136	NA	NA	NA	NA	NA	NA	NA	NA	NA	NA	NA	NA	NA	NA	NA	NA	NA	NA	NA	NA
Skt_A2AQ25_S302_2	Skt	A2AQ25	S302	2	NA	NA	NA	NA	NA	NA	NA	NA	NA	NA	NA	NA	NA	NA	NA	NA	NA	NA	NA	NA	NA	NA	13.2729	NA	NA	NA	NA	NA	NA	NA	NA	NA	NA	NA	NA	NA	NA	NA	NA	NA	NA	NA	NA	NA	NA
Skt_A2AQ25_S1843_1	Skt	A2AQ25	S1843	1	19.3617	19.4676	19.4991	19.456	19.2328	19.1307	19.2956	19.3062	19.7448	19.7646	19.809	19.8988	19.8845	19.8065	19.792	19.8222	20.0139	19.9277	19.8009	19.7816	19.9257	19.9814	19.7555	19.7454	19.7535	19.7383	19.6622	19.6437	19.8448	19.6403	19.9743	20.1975	20.4598	19.7692	20.4202	20.3307	20.3525	20.0224	19.584	19.8362	19.8916	19.6802	19.9155	19.6408	19.7882
Skt_A2AQ25_S409_2	Skt	A2AQ25	S409	2	NA	NA	14.6426	NA	14.9429	15.6206	NA	NA	NA	NA	NA	NA	NA	NA	15.2498	NA	NA	NA	NA	NA	NA	NA	NA	7.47243	NA	NA	NA	NA	14.9294	NA	NA	NA	NA	NA	NA	NA	NA	NA	15.5263	NA	NA	13.9174	15.5236	NA	NA
Skt_A2AQ25_S405_2	Skt	A2AQ25	S405	2	NA	NA	NA	NA	NA	NA	14.912	NA	14.437	14.2362	15.6855	15.2715	NA	15.2971	NA	14.8448	NA	NA	NA	13.9221	NA	NA	14.7743	7.47243	NA	NA	NA	NA	14.9294	15.065	NA	NA	NA	NA	NA	12.9101	14.3758	14.7755	16.4469	12.9339	NA	15.6792	15.6619	15.1054	NA
Skt_A2AQ25_S408_2	Skt	A2AQ25	S408	2	NA	NA	14.6426	NA	14.9429	15.6206	14.912	NA	14.437	14.2362	15.6855	15.2715	NA	15.2971	15.2498	14.8448	NA	NA	NA	13.9221	NA	NA	14.7743	NA	NA	NA	NA	NA	NA	15.065	NA	NA	NA	NA	NA	12.9101	14.3758	14.7755	15.3628	12.9339	NA	15.1751	15.7017	15.1054	NA
Skt_A2AQ25_T465_2	Skt	A2AQ25	T465	2	NA	NA	NA	NA	NA	NA	NA	NA	NA	12.6522	NA	NA	NA	NA	NA	NA	NA	NA	NA	11.3372	NA	NA	NA	NA	NA	NA	NA	NA	NA	NA	NA	NA	NA	NA	NA	NA	NA	NA	NA	NA	NA	NA	NA	NA	NA
Skt_A2AQ25_S468_2	Skt	A2AQ25	S468	2	NA	NA	NA	NA	15.4664	NA	NA	NA	NA	NA	NA	NA	NA	NA	NA	14.2134	NA	NA	NA	NA	NA	NA	NA	NA	NA	14.6151	NA	NA	NA	NA	14.5959	NA	NA	NA	NA	NA	NA	NA	12.3694	NA	NA	NA	NA	NA	NA
Skt_A2AQ25_S1647_1	Skt	A2AQ25	S1647	1	15.3277	15.2462	15.3217	15.5952	15.1906	15.206	15.4718	15.819	15.7415	NA	15.8809	15.7109	15.6001	15.9956	15.363	16.0026	15.2323	16.4166	16.082	15.6628	15.6346	15.7569	16.1091	16.1717	16.0076	15.5838	NA	15.8828	16.0675	16.2075	15.6455	15.7662	15.8134	15.6991	15.7309	15.2602	15.8726	16.0875	15.7205	15.9569	14.6487	14.8869	15.2369	15.2426	15.0598
Skt_A2AQ25_T1651_1	Skt	A2AQ25	T1651	1	NA	NA	NA	NA	NA	NA	NA	NA	NA	NA	NA	NA	NA	NA	14.8559	NA	NA	NA	NA	NA	NA	NA	NA	NA	NA	NA	14.2455	NA	NA	NA	NA	NA	NA	NA	NA	NA	NA	NA	NA	NA	NA	NA	NA	NA	NA
Skt_A2AQ25_S1038_1	Skt	A2AQ25	S1038	1	14.0118	NA	13.8909	13.6197	NA	NA	9.79318	NA	17.7568	12.5152	NA	14.3657	NA	NA	12.9185	NA	NA	NA	13.6168	14.149	NA	18.0344	13.112	10.4432	13.8144	NA	14.4015	NA	NA	NA	14.3399	NA	NA	NA	NA	12.8313	NA	12.2251	NA	13.3279	NA	NA	NA	13.4238	NA
Skt_A2AQ25_S1035_1	Skt	A2AQ25	S1035	1	14.6845	14.5384	14.6564	NA	14.8287	NA	NA	14.4298	14.5069	14.4304	NA	16.5148	14.8637	NA	NA	NA	15.4562	15.2463	14.8743	15.1697	14.4495	NA	NA	14.1986	14.9513	14.6097	NA	NA	16.1476	14.3408	NA	14.6856	14.6407	14.8451	14.6341	14.7829	14.7748	NA	NA	NA	14.4819	12.313	14.4373	14.3805	14.1844
Skt_A2AQ25_S1038_2	Skt	A2AQ25	S1038	2	15.3208	15.8189	15.5672	15.6712	14.5242	15.407	15.8233	14.2151	16.2822	16.2497	15.2734	16.0846	16.1984	16.2186	15.8685	15.6641	15.9232	15.6721	14.878	14.9767	14.7763	16.181	15.5505	15.2092	15.7351	15.6029	15.6815	15.4739	15.9325	14.9862	15.7303	15.7052	15.7095	15.1101	15.7145	16.465	16.3384	15.7872	15.7242	16.38	16.3504	16.654	16.1281	14.7013	15.6889
Skt_A2AQ25_S1032_2	Skt	A2AQ25	S1032	2	14.2825	14.7935	13.5115	14.3173	14.5849	14.3737	14.7313	14.499	15.5447	15.2515	13.902	15.1351	15.45	15.1531	15.0274	13.7448	14.4061	14.7879	13.791	13.4166	12.7326	15.6138	15.1139	13.2372	14.8523	14.3084	15.0088	14.4298	14.8912	14.1871	13.892	14.6571	14.8612	13.9966	14.94	15.8184	15.7148	14.8767	14.9369	15.4941	15.4983	16.0089	15.0946	15.095	14.532
Skt_A2AQ25_S1035_2	Skt	A2AQ25	S1035	2	14.4808	14.8439	15.1702	15.3876	13.718	14.5679	14.9098	12.014	15.39	15.7368	15.7449	15.8771	15.3906	15.4359	15.3291	15.7811	15.3032	14.5462	13.96	14.5975	14.3756	15.4728	13.6131	15.5368	15.0303	14.8474	15.3588	15.0465	15.0526	14.3299	15.7318	14.7519	14.9624	14.2153	15.1883	14.996	14.8277	15.0986	15.614	15.7064	15.9694	15.9998	15.1608	13.0291	14.8303
Skt_A2AQ25_S505_1	Skt	A2AQ25	S505	1	NA	14.1576	NA	NA	19.419	16.4951	13.4928	13.3358	14.5677	14.7953	12.869	14.2253	14.1181	13.8021	14.2177	14.2523	15.2924	18.9686	NA	14.125	NA	13.2427	NA	15.241	15.5038	12.374	13.434	13.8245	13.6335	14.3344	14.2275	13.3305	14.2013	14.5571	15.4357	14.3004	15.2342	15.5922	13.5058	13.2743	12.8108	11.422	14.3051	13.4557	13.1787
Skt_A2AQ25_T498_1	Skt	A2AQ25	T498	1	NA	NA	13.1891	13.0832	NA	14.0406	NA	13.9975	NA	NA	NA	NA	NA	NA	NA	NA	13.1693	NA	14.1191	NA	12.8216	13.3224	13.5714	NA	NA	13.7262	13.384	14.4486	NA	NA	NA	13.4111	13.749	13.4439	NA	NA	NA	NA	NA	13.0582	11.9906	NA	13.4343	12.7614	13.1802
Skt_A2AQ25_S1550_1	Skt	A2AQ25	S1550	1	18.2667	16.8546	17.2033	16.8476	18.6829	18.5342	19.0301	18.9472	17.9612	16.5537	18.3427	16.6641	17.3886	18.9754	18.4994	17.3513	17.6001	17.4025	17.0979	17.146	17.2636	17.4343	17.1477	17.6895	17.6227	18.0379	17.7784	17.3138	17.7594	17.8116	17.3167	17.2879	17.3618	17.9553	17.7944	17.2844	18.3512	17.2883	18.5524	16.3063	17.8756	17.9513	16.1017	18.45	17.3488
Skt_A2AQ25_S1551_1	Skt	A2AQ25	S1551	1	NA	NA	NA	NA	NA	NA	NA	NA	NA	NA	NA	NA	NA	NA	NA	NA	NA	NA	NA	NA	NA	NA	NA	NA	NA	NA	NA	NA	NA	14.0585	NA	NA	NA	NA	NA	NA	NA	NA	NA	NA	NA	NA	NA	NA	NA
Skt_A2AQ25_S1554_2	Skt	A2AQ25	S1554	2	NA	NA	NA	NA	NA	NA	13.5869	NA	NA	NA	NA	NA	NA	NA	NA	NA	NA	NA	NA	NA	NA	NA	NA	12.1418	NA	NA	NA	NA	NA	NA	NA	NA	NA	NA	NA	NA	NA	NA	NA	NA	NA	NA	NA	NA	NA
Skt_A2AQ25_S1550_2	Skt	A2AQ25	S1550	2	NA	NA	NA	NA	NA	NA	13.5869	NA	NA	NA	NA	NA	NA	NA	NA	NA	NA	NA	NA	NA	NA	NA	NA	NA	NA	NA	NA	NA	NA	NA	NA	NA	NA	NA	NA	NA	NA	NA	NA	NA	NA	NA	NA	NA	NA
Skt_A2AQ25_S1551_2	Skt	A2AQ25	S1551	2	NA	NA	NA	NA	NA	NA	NA	NA	NA	NA	NA	NA	NA	NA	NA	NA	NA	NA	NA	NA	NA	NA	NA	12.1418	NA	NA	NA	NA	NA	NA	NA	NA	NA	NA	NA	NA	NA	NA	NA	NA	NA	NA	NA	NA	NA
Skt_A2AQ25_S1741_1	Skt	A2AQ25	S1741	1	10.7684	NA	10.1955	9.50949	13.0345	11.9436	13.0338	12.7504	12.0295	NA	11.9352	NA	NA	13.0257	12.5453	NA	11.0591	NA	NA	NA	9.64115	10.4812	11.6695	12.4586	NA	11.3982	12.2798	10.7712	11.8371	11.2609	NA	NA	NA	12.086	11.8881	NA	12.8885	NA	10.1139	NA	12.1497	NA	NA	12.6811	11.1837
Skt_A2AQ25_S1557_1	Skt	A2AQ25	S1557	1	NA	NA	NA	12.877	NA	NA	NA	NA	NA	13.3869	NA	11.8768	12.5877	NA	13.2611	NA	NA	NA	12.7886	NA	12.9389	13.686	13.0077	13.1905	13.0978	11.8523	12.891	NA	NA	NA	NA	13.7006	NA	NA	NA	12.7113	NA	13.8784	13.0753	NA	10.7757	NA	13.1274	10.9913	NA
Skt_A2AQ25_S1554_1	Skt	A2AQ25	S1554	1	NA	NA	NA	NA	NA	NA	NA	12.5362	13.2937	NA	13.706	13.4053	12.5595	NA	13.0087	13.9992	NA	13.7173	NA	12.9504	NA	13.9258	13.2113	13.2751	NA	NA	NA	13.4915	13.6159	13.4944	13.725	13.7178	12.373	13.5911	13.6913	13.1003	11.3856	NA	12.9683	NA	NA	11.4224	NA	NA	12.345
Skt_A2AQ25_Y244_1	Skt	A2AQ25	Y244	1	NA	NA	NA	13.6788	NA	NA	14.4986	13.234	13.6756	13.9106	14.4547	14.3843	14.1685	13.5487	13.887	NA	13.7703	NA	NA	NA	14.3088	13.1724	NA	13.0041	NA	NA	14.0163	12.46	11.669	15.0074	NA	13.7786	13.8375	14.3718	14.5617	14.2614	13.8696	13.7265	NA	NA	NA	NA	NA	13.3603	14.2306
Myh7b_A2AQP0_S1725_1	Myh7b	A2AQP0	S1725	1	19.2208	19.0845	NA	18.8782	17.7381	15.5752	19.0127	19.3957	19.1118	19.4677	19.1099	19.4106	19.288	19.1914	19.0822	19.0482	19.5896	19.4451	NA	16.39	19.3102	18.8663	19.3283	19.3523	NA	19.0688	19.2847	19.143	19.0608	19.5595	19.2601	18.0107	NA	14.3838	19.2747	19.2812	19.5595	19.066	19.2741	NA	NA	NA	17.7757	19.7928	17.1819
Myh7b_A2AQP0_S1526_2	Myh7b	A2AQP0	S1526	2	14.0183	12.3655	16.8625	12.8978	11.1046	11.8628	12.4683	12.8781	13.3348	12.8117	13.4466	13.6013	12.8915	12.9525	13.0225	NA	13.3074	12.4769	12.855	13.4328	12.9813	12.8453	13.5951	13.8432	11.8697	13.524	13.543	13.3296	NA	12.1938	13.2322	13.8159	12.8171	13.2282	13.1093	NA	NA	13.1384	11.188	12.3976	12.7872	13.3746	12.6904	12.9629	NA
Myh7b_A2AQP0_S1524_2	Myh7b	A2AQP0	S1524	2	14.0183	12.3655	16.8625	12.8978	11.1046	11.8628	12.4683	12.8781	13.3348	12.8117	13.4466	13.6013	12.8915	12.9525	13.0225	NA	13.3074	12.4769	12.855	13.4328	12.9813	12.8453	13.5951	13.8432	11.8697	13.524	13.543	13.3296	NA	12.1938	13.2322	13.8159	12.8171	13.2282	13.1093	NA	NA	13.1384	11.188	12.3976	12.7872	13.3746	12.6904	12.9629	NA
Myh7b_A2AQP0_S1517_1	Myh7b	A2AQP0	S1517	1	14.1431	14.3008	14.3657	13.108	14.0354	16.7595	14.0305	13.4492	12.7783	10.5828	11.8788	12.1821	16.0558	12.741	12.0278	10.4276	NA	14.0352	13.6816	13.7104	13.4963	12.6051	12.2195	11.9155	13.7015	13.9226	NA	12.7012	9.99357	NA	NA	15.7796	16.1742	12.3443	15.7285	15.9779	15.8803	10.9474	16.1616	15.3832	13.4236	NA	13.3832	NA	13.3877
Ppig_A2AR02_S685_1	Ppig	A2AR02	S685	1	18.0595	18.0234	18.0663	18.4274	18.0709	17.9654	18.0749	18.2891	18.3448	18.1034	18.2281	18.0451	18.2674	18.1237	18.3547	18.4059	18.1367	18.0219	18.2037	18.4036	18.4921	18.2153	18.3954	18.2319	17.5757	18.336	18.4968	18.4904	18.3673	18.6051	18.6051	18.4457	17.911	18.2014	18.477	18.4324	17.9303	18.5764	17.9504	17.9162	17.8902	18.1289	17.8441	17.7573	18.0546
Ppig_A2AR02_T356_2	Ppig	A2AR02	T356	2	18.0395	17.6103	18.7706	18.7549	17.4316	18.1625	18.7967	18.6906	18.95	18.5685	18.62	18.7474	19.1136	18.6704	18.7601	18.8881	18.8454	18.1108	18.5466	18.8212	19.0974	18.87	18.4084	18.6567	18.714	18.9231	18.9869	19.0038	18.8788	18.5282	18.8982	18.2481	18.6373	18.2948	18.777	18.5275	18.6502	18.7454	17.2581	17.6519	17.7824	17.9858	16.7938	17.6623	17.8747
Ppig_A2AR02_S354_2	Ppig	A2AR02	S354	2	18.0395	17.6103	18.7706	18.7549	17.4316	18.1625	18.7967	18.6906	18.95	18.5685	18.62	18.7474	19.1136	18.6704	18.7601	18.8881	18.8454	18.1108	18.5466	18.8212	19.0974	18.87	18.4084	18.6567	18.714	18.9231	18.9869	19.0038	18.8788	18.5282	18.8982	18.2481	18.6373	18.2948	18.777	18.5275	18.6502	18.7454	17.2581	17.6519	17.7824	17.9858	16.7938	17.6623	17.8747
Ppig_A2AR02_S413_1	Ppig	A2AR02	S413	1	NA	NA	14.4565	14.5922	NA	NA	NA	14.3606	14.4009	NA	NA	13.9749	NA	NA	14.7859	14.0089	NA	NA	NA	15.3149	NA	NA	NA	14.0139	NA	14.7712	NA	NA	8.28917	NA	NA	14.5767	14.2113	15.8073	14.5549	NA	NA	14.8295	NA	NA	NA	NA	NA	NA	NA
Ppig_A2AR02_S411_1	Ppig	A2AR02	S411	1	15.0019	14.9975	15.2225	15.1893	14.9643	14.8734	14.9591	15.3751	15.3339	15.0625	14.9829	14.9719	15.4899	15.148	15.4306	15.4638	15.6203	14.8302	15.0251	NA	15.3243	15.3737	15.1327	15.2863	15.3459	15.3916	15.3343	15.5423	15.237	15.4438	15.7636	15.1168	14.7722	15.1355	15.6219	15.391	14.6665	15.3905	13.5587	13.9794	13.7946	13.9046	13.2943	12.9813	13.6524
Ppig_A2AR02_S413_2	Ppig	A2AR02	S413	2	15.4564	15.8438	15.6318	15.0675	14.6166	14.7801	15.6036	14.8755	14.772	15.6137	13.2251	15.8315	14.2734	15.6776	15.2403	16.0335	14.0883	15.1799	15.1507	15.5065	15.0613	15.3635	15.4092	15.0566	15.1631	16.0686	15.2414	15.3486	15.6086	14.9561	14.7812	16.1335	16.0846	14.763	15.4029	15.1664	14.4285	16.0097	14.3279	15.3118	14.5628	15.167	14.0502	14.1974	15.0672
Ppig_A2AR02_S411_2	Ppig	A2AR02	S411	2	15.4564	15.8438	15.6318	15.0675	14.6166	14.7801	15.6036	14.8755	14.772	15.6137	13.2251	15.8315	14.2734	15.6776	15.2403	16.0335	14.0883	15.1799	15.1507	15.5065	15.0613	15.3635	15.4092	15.0566	15.1631	16.0686	15.2414	15.3486	15.6086	14.9561	14.7812	16.1335	16.0846	14.763	15.4029	15.1664	14.4285	16.0097	14.3279	15.3118	14.5628	15.167	14.0502	14.1974	15.0672
Ppig_A2AR02_S532_1	Ppig	A2AR02	S532	1	NA	NA	NA	10.6622	NA	NA	NA	10.2041	13.8415	NA	NA	NA	NA	NA	NA	NA	NA	NA	NA	NA	NA	NA	NA	13.0651	NA	11.4532	NA	NA	NA	13.5533	NA	NA	NA	NA	13.5872	13.5085	NA	13.8454	NA	NA	NA	NA	NA	NA	NA
Ppip5k1_A2ARP1_S1147_1	Ppip5k1	A2ARP1	S1147	1	19.2256	19.1702	19.1205	19.0254	19.262	19.2093	18.917	19.3734	19.3442	19.261	19.7049	19.3712	19.3246	19.2614	19.2511	19.2971	19.4489	19.5609	19.2272	19.2356	19.1525	19.2334	19.2545	19.0355	19.0225	19.1915	18.8707	18.7555	19.0695	18.4304	19.1234	19.0847	19.2163	18.9481	19.0162	19.0399	19.12	18.9933	18.6682	18.9204	18.6695	18.6433	18.814	18.647	18.6628
Ppip5k1_A2ARP1_S939_1	Ppip5k1	A2ARP1	S939	1	15.4291	17.7175	18.0628	18.0346	16.0189	17.2605	17.8277	18.0756	18.0389	NA	18.6239	18.3507	17.9911	18.1398	18.1075	18.2837	18.5238	17.9567	17.3502	17.8926	17.7756	17.6934	18.0701	17.9008	17.488	17.9146	17.2862	17.1093	17.9289	17.6417	17.9315	18.1302	18.1263	17.8637	17.8516	18.024	17.9888	17.9642	17.4324	18.1967	17.5921	17.6611	17.7166	17.6227	18.0048
Ppip5k1_A2ARP1_S959_1	Ppip5k1	A2ARP1	S959	1	17.4192	17.3352	17.3134	17.1176	17.2702	17.4687	16.7233	17.3566	17.3305	17.2507	16.855	16.7108	16.6913	16.767	17.1759	16.751	16.7736	17.4815	17.3282	17.1464	16.9465	17.2559	16.9431	16.7787	17.1887	16.9194	16.8391	16.9271	16.9893	16.3305	16.5836	17.0623	17.0323	16.9753	16.9192	16.8474	16.9473	16.8247	17.6235	17.3971	17.4803	17.2125	17.5431	17.2009	17.1769
Ppip5k1_A2ARP1_T958_1	Ppip5k1	A2ARP1	T958	1	NA	NA	NA	NA	NA	NA	15.3053	NA	15.5313	NA	NA	15.1447	14.699	15.2167	NA	NA	14.7378	NA	NA	NA	NA	NA	14.909	NA	NA	NA	NA	14.6298	NA	NA	14.4425	NA	14.9272	NA	NA	14.3482	NA	NA	NA	NA	NA	NA	NA	NA	NA
Ppip5k1_A2ARP1_S982_1	Ppip5k1	A2ARP1	S982	1	16.1306	15.3159	15.4187	15.3778	16.0676	NA	15.3585	15.8918	15.8389	NA	15.6153	14.8148	15.6255	15.8668	15.615	15.5722	16.5489	15.3461	15.2818	NA	15.7196	15.7655	15.6045	14.9699	15.5201	15.569	15.5049	15.269	15.2598	14.6136	14.2792	14.8275	16.1729	16.1152	14.0646	15.7069	15.0747	15.0675	14.483	NA	NA	15.0614	14.6508	13.342	14.2256
Agrn_A2ASQ1_S569_1	Agrn	A2ASQ1	S569	1	NA	NA	NA	12.9884	NA	NA	11.4395	NA	NA	NA	11.8703	12.8439	NA	NA	NA	NA	11.1887	NA	11.8563	NA	11.5352	11.5371	NA	NA	NA	11.4178	11.4621	NA	12.1511	NA	12.3726	NA	NA	NA	NA	NA	NA	NA	NA	NA	NA	12.7844	NA	NA	NA
Agrn_A2ASQ1_S566_1	Agrn	A2ASQ1	S566	1	NA	12.8313	11.9148	NA	NA	9.56883	NA	11.4155	13.1788	NA	NA	NA	NA	12.87	13.3905	NA	NA	NA	NA	NA	NA	NA	NA	NA	NA	NA	NA	NA	NA	NA	NA	11.3831	NA	NA	NA	NA	NA	NA	NA	NA	12.2878	NA	NA	11.7647	NA
Agrn_A2ASQ1_S571_1	Agrn	A2ASQ1	S571	1	NA	NA	NA	NA	NA	NA	NA	NA	NA	NA	NA	NA	NA	NA	NA	NA	NA	NA	NA	NA	NA	NA	NA	NA	NA	NA	NA	NA	NA	13.5272	NA	NA	NA	NA	NA	13.5553	NA	NA	NA	NA	NA	NA	NA	NA	NA
Ttn_A2ASS6_S10281_1	Ttn	A2ASS6	S10281	1	27.6455	28.2926	28.1665	28.0471	27.7666	28.3326	28.353	28.3295	28.1793	28.4253	28.2402	28.4345	28.3525	28.2114	28.1748	28.1319	24.8691	27.8004	28.0705	28.5005	28.5562	28.4404	28.4532	28.5727	28.1117	28.4994	28.4212	28.3307	28.3333	28.5257	28.3685	28.6433	28.6207	28.5398	28.3644	28.5548	28.6322	28.4267	27.6789	28.1727	28.6121	28.3814	28.3755	28.4285	28.2714
Ttn_A2ASS6_S12871_2	Ttn	A2ASS6	S12871	2	25.2525	27.5093	27.1127	26.8815	25.3427	27.3775	27.4805	27.3833	26.2836	27.029	26.5794	26.6818	26.1325	26.5835	26.9278	26.1993	26.9135	26.4165	27.5718	25.1456	27.5534	25.1973	25.2284	27.7155	27.7335	27.544	27.593	25.5514	24.6783	27.6645	26.4326	26.685	27.4731	27.2018	26.7195	26.8286	27.4577	27.357	26.9922	26.6285	24.8087	26.7125	27.3119	24.909	26.3253
Ttn_A2ASS6_T12869_2	Ttn	A2ASS6	T12869	2	25.2525	27.5093	27.1127	26.8815	25.3427	27.3775	27.4805	27.3833	26.2836	27.029	26.5794	26.6818	26.1325	26.5835	26.9278	26.1993	26.9135	26.4165	27.5718	25.1456	27.5534	25.1973	25.2284	27.7155	27.7335	27.544	27.593	25.5514	24.6783	27.6645	26.4326	26.685	27.4731	27.2018	26.7195	26.8286	27.4577	27.357	26.9922	26.6285	24.8087	26.7125	27.3119	24.909	26.3253
Ttn_A2ASS6_S12871_1	Ttn	A2ASS6	S12871	1	26.8275	26.9212	26.7224	26.7078	26.5814	26.9739	26.9295	27.0381	26.8018	26.8977	26.7847	27.0018	26.8718	26.7657	26.7312	26.7165	27.0748	26.8892	26.7882	27.0522	27.0059	26.8153	27.0365	26.9513	26.7949	26.9732	27.0829	27.3259	26.9515	27.3066	26.9121	27.0944	27.0813	27.0991	26.7151	26.8145	27.0908	26.9006	26.1929	26.6026	26.6555	25.7802	26.8247	26.596	26.4034
Ttn_A2ASS6_T12869_1	Ttn	A2ASS6	T12869	1	17.1828	17.1911	16.6389	17.0771	NA	17.2064	17.8002	17.8854	16.7928	17.5244	17.2202	16.8812	16.0039	16.9978	17.4403	16.6414	16.9117	NA	17.5534	17.5273	17.6476	18.0452	17.4865	18.037	17.3087	17.6336	17.7932	18.1991	17.153	18.2138	16.8044	17.4041	17.5367	17.8405	17.2485	17.0352	17.6034	17.9407	16.7196	16.0721	16.5876	15.9344	16.9169	16.9093	15.6199
Ttn_A2ASS6_S34476_1	Ttn	A2ASS6	S34476	1	24.554	24.5832	25.036	28.0948	24.3273	24.3472	28.2871	25.0655	28.1945	25.5637	28.301	24.3531	25.8422	28.1427	28.3962	28.4181	24.4217	25.7041	25.6725	23.9697	24.6411	28.5563	25.2539	28.6425	24.185	28.7202	25.2658	28.6606	28.5078	29.0508	28.5235	24.0375	25.3881	28.7044	25.5997	24.3206	23.7885	28.7972	23.518	28.1237	23.8418	28.0659	23.8657	28.2727	28.1702
Ttn_A2ASS6_S34482_2	Ttn	A2ASS6	S34482	2	16.1038	17.2432	16.5334	15.7143	16.8878	16.7403	15.9296	16.6703	15.7339	16.1827	15.7216	17.0695	17.8337	16.2564	15.1551	17.4209	15.4275	16.0857	16.2421	16.3429	14.027	15.8573	15.3193	15.5691	15.2465	15.8044	16.8072	15.899	15.3556	17.0544	14.5302	19.0159	19.3077	15.8763	13.4551	15.332	15.6352	15.2673	15.7747	15.6791	15.9869	NA	16.3337	14.5551	14.7913
Ttn_A2ASS6_S34476_2	Ttn	A2ASS6	S34476	2	16.1038	17.2432	16.7224	15.9362	16.8878	16.7403	15.9296	16.8369	15.7339	16.4326	15.7216	17.0695	17.8337	16.2564	15.1551	17.4862	15.6136	16.0857	16.2421	16.3429	14.4847	16.086	15.3193	15.757	15.2465	16.1453	16.9633	16.1387	15.8628	17.0544	14.9363	19.0159	19.3077	15.8763	13.4551	15.332	15.7434	15.2673	15.7747	15.6791	16.1458	13.2305	16.3337	15.1374	15.263
Ttn_A2ASS6_S301_2	Ttn	A2ASS6	S301	2	26.3855	26.7048	26.3444	26.2607	26.2975	26.4096	26.4015	26.477	26.4379	26.342	26.2128	26.3559	26.3163	26.1753	26.1972	26.3609	26.4026	26.3656	26.4644	26.5141	26.5322	26.5444	26.4103	26.6515	26.5074	26.4292	26.5852	26.6478	26.5194	26.7982	26.2438	26.291	26.3433	26.6232	26.1415	26.1422	26.2849	26.5827	26.4929	26.5781	26.6377	26.4565	26.8615	26.4597	26.1722
Ttn_A2ASS6_T299_2	Ttn	A2ASS6	T299	2	26.3833	26.7031	26.342	26.2583	26.2957	26.4088	26.3988	26.475	26.4352	26.341	26.2102	26.3546	26.3141	26.1742	26.1961	26.3584	26.4004	26.363	26.463	26.5133	26.5322	26.5436	26.4095	26.6507	26.5061	26.4274	26.5845	26.6473	26.5184	26.7968	26.242	26.288	26.3404	26.6226	26.1393	26.1393	26.2824	26.582	26.492	26.5762	26.6349	26.454	26.8596	26.4567	26.169
Ttn_A2ASS6_T299_1	Ttn	A2ASS6	T299	1	22.3525	22.4464	21.9411	22.0007	22.179	22.2134	22.0937	22.2877	22.1337	22.3754	22.2855	22.4516	22.4812	22.0082	22.1259	22.337	22.4282	22.5646	22.1494	22.2308	22.3694	22.1142	22.0782	22.279	22.4807	22.2903	22.2752	22.3639	22.2279	22.643	22.0817	22.2848	22.4499	22.3979	21.9008	22.1821	22.436	22.4052	21.273	21.5317	21.6326	21.147	21.8277	21.5426	21.1622
Ttn_A2ASS6_S301_1	Ttn	A2ASS6	S301	1	22.2399	22.1132	21.741	21.7147	21.9012	21.8828	21.9911	22.1249	21.9572	21.9794	21.8287	21.9621	21.9312	21.824	21.7519	21.8377	21.9334	22.3275	22.2596	22.2357	22.0605	22.2779	22.2031	22.2186	22.2517	22.2061	22.1766	22.4533	22.101	22.533	21.8846	22.0626	22.1685	22.15	21.7732	21.8752	22.19	22.097	21.2668	21.4657	21.3836	21.1024	21.6813	21.4214	21.1137
Ttn_A2ASS6_S814_1	Ttn	A2ASS6	S814	1	25.139	25.0929	24.9704	24.9407	24.8454	24.9617	25.0929	25.1421	25.0055	25.0187	24.9126	25.1413	25.1482	24.8016	24.9177	24.7535	25.2595	25.2004	25.1314	25.4099	22.7371	25.2413	25.155	25.1617	25.1343	25.2989	25.0401	25.4396	24.977	25.0569	25.2593	25.3103	25.437	25.2213	25.0996	25.1473	25.0636	25.0042	23.9136	24.5701	24.8408	24.2468	24.76	23.8705	24.7915
Ttn_A2ASS6_S814_2	Ttn	A2ASS6	S814	2	22.3229	22.2232	22.0763	22.1529	21.8915	22.1159	22.445	22.1778	22.2041	22.2164	22.0931	22.2905	22.1858	22.1435	22.1399	21.9426	22.3192	22.2195	22.2438	22.1705	22.2657	22.186	22.2609	22.4967	21.9716	22.0949	21.927	22.2632	22.1885	22.4503	22.141	22.3643	22.5926	22.4627	22.1986	22.1357	22.2778	22.0735	22.6074	22.3061	22.9017	22.5068	22.6558	22.5958	22.5509
Ttn_A2ASS6_T812_2	Ttn	A2ASS6	T812	2	22.3229	22.2232	22.0763	22.1529	21.8915	22.1159	22.445	22.1778	22.2041	22.2164	22.0931	22.2905	22.1858	22.1435	22.1399	21.9426	22.3192	22.2195	22.2438	22.1705	22.2657	22.186	22.2609	22.4967	21.9716	22.0949	21.927	22.2632	22.1885	22.4503	22.141	22.3643	22.5926	22.4627	22.1986	22.1357	22.2778	22.0735	22.6074	22.3061	22.9017	22.5068	22.6558	22.5958	22.5509
Ttn_A2ASS6_S307_1	Ttn	A2ASS6	S307	1	26.274	26.3671	26.1611	26.1128	26.0711	22.6652	23.1119	26.333	26.2822	26.2777	26.1846	26.3777	26.3519	26.1619	26.2057	26.1826	26.3907	26.3304	26.2758	26.4408	26.3921	26.5899	26.4872	26.3916	26.2803	26.3878	26.5605	26.5166	26.2524	26.7794	26.4824	26.681	26.3616	26.5325	26.5615	25.5416	26.3096	26.5398	25.6536	25.7673	26.0389	25.6669	25.8746	25.9119	25.8374
Ttn_A2ASS6_S305_1	Ttn	A2ASS6	S305	1	NA	17.0906	17.4572	NA	NA	17.5851	16.9941	17.1495	NA	NA	17.2728	16.5178	16.542	15.745	NA	NA	NA	17.2565	NA	NA	17.2488	NA	15.85	NA	16.4234	17.2841	17.6137	NA	NA	17.5029	NA	18.0114	16.3962	NA	16.7176	16.4957	16.198	17.6286	16.6736	17.2861	NA	15.782	17.3301	16.5155	NA
Ttn_A2ASS6_S307_2	Ttn	A2ASS6	S307	2	21.2912	21.1324	20.8278	20.8795	20.8674	21.0974	21.0358	21.0639	20.8802	20.9801	20.7718	20.9966	20.9916	20.8989	21.0018	21.1221	21.3298	20.9445	20.4646	20.3564	20.8729	20.6605	20.0576	20.6664	20.4857	20.9134	21.2032	20.8374	20.5401	21.0795	20.8185	20.9987	20.5441	21.1828	20.9303	20.9368	20.6177	20.7588	20.5735	20.7707	20.9996	20.5973	21.0531	20.5319	20.2986
Ttn_A2ASS6_S305_2	Ttn	A2ASS6	S305	2	21.3646	21.2136	20.932	20.974	20.928	21.1324	21.1286	21.1279	21.0004	21.0079	20.8638	21.0493	21.0789	20.943	21.0282	21.2118	21.397	21.037	20.5338	20.3673	20.8527	20.6856	20.1194	20.6993	20.5596	20.9934	21.2282	20.8591	20.5924	21.1382	20.8965	21.1112	20.6674	21.2105	21.0114	21.0128	20.7407	20.7993	20.5865	20.8726	21.1313	20.7339	21.1307	20.7038	20.4759
Ttn_A2ASS6_S34065_2	Ttn	A2ASS6	S34065	2	27.2685	27.4772	27.2985	27.1683	27.101	27.4249	27.5373	27.2196	27.0233	26.8232	26.5438	27.1438	27.0597	26.5694	26.5545	26.8378	27.4337	27.3282	27.3673	27.23	27.1671	26.9741	26.5932	26.7971	27.0577	27.1717	27.335	26.6969	26.4343	26.7461	26.8774	27.2022	27.3054	27.2122	26.9829	27.1054	27.2966	26.7619	27.4621	27.4344	27.9336	27.6197	27.9808	27.7417	27.5704
Ttn_A2ASS6_S34063_2	Ttn	A2ASS6	S34063	2	27.2675	27.4771	27.2984	27.1682	27.1014	27.4249	27.5373	27.2195	27.0232	26.8227	26.5436	27.142	27.0597	26.5693	26.5547	26.838	27.4341	27.3285	27.3665	27.23	27.1671	26.974	26.5936	26.7967	27.0577	27.172	27.3344	26.6977	26.4342	26.7457	26.8768	27.2213	27.3057	27.2122	26.9823	27.1054	27.2965	26.7618	27.4621	27.4344	27.9339	27.6197	27.9812	27.7417	27.5704
Ttn_A2ASS6_S34063_1	Ttn	A2ASS6	S34063	1	20.3356	19.4593	18.7573	19.3986	19.9131	20.4753	19.8459	19.6046	19.0817	19.2305	19.9345	18.5245	19.0424	19.9293	19.0988	19.1667	19.5631	19.7273	20.5864	20.4599	20.7795	20.4775	20.407	20.8262	20.1309	20.202	20.9595	20.7071	20.4459	20.387	20.539	20.5035	20.7688	21.162	19.7171	20.7767	21.1231	20.1868	20.0755	19.8955	20.6435	20.4204	19.321	20.1802	20.6258
Ttn_A2ASS6_S34065_1	Ttn	A2ASS6	S34065	1	19.5238	20.3975	20.2344	20.401	20.013	20.2235	20.1752	20.187	19.8287	19.9405	19.4004	20.114	19.8716	19.6186	19.529	19.7301	20.1962	19.6432	20.2058	18.997	19.12	19.0654	19.0208	19.1371	19.0712	20.0548	20.2012	18.769	18.7878	19.1317	18.4717	19.7824	19.3196	20.3898	20.058	18.8175	15.9733	20.0462	18.9386	19.4536	20.0018	18.8558	19.6642	20.0512	20.0018
Ttn_A2ASS6_Y34068_2	Ttn	A2ASS6	Y34068	2	NA	NA	NA	NA	15.5043	NA	NA	NA	NA	14.6485	13.7107	13.9028	NA	NA	15.1474	14.2445	15.8292	15.078	NA	NA	NA	NA	16.1891	NA	NA	15.4232	NA	15.8526	NA	NA	NA	21.0104	14.8401	NA	NA	NA	NA	NA	NA	NA	15.6777	NA	16.1926	NA	NA
Ttn_A2ASS6_T266_1	Ttn	A2ASS6	T266	1	25.1147	25.2235	24.9931	25.0458	25.1344	25.1849	25.4008	25.5504	25.2825	25.3098	25.3915	25.3641	25.4723	25.3219	25.2604	25.4295	25.7334	25.3798	25.0448	25.233	25.2878	25.3317	25.2622	25.5693	25.2253	25.5163	25.2559	25.5168	25.3682	25.2963	25.2497	25.4631	25.6825	25.6831	25.3379	25.6281	25.6862	25.4915	24.1552	24.4594	24.636	24.4591	24.6941	24.7762	24.7083
Ttn_A2ASS6_S264_1	Ttn	A2ASS6	S264	1	24.7919	24.8812	25.0173	24.44	24.5075	24.6045	24.6332	24.2361	24.6418	24.5024	24.143	24.2462	24.4522	24.3399	24.4671	23.9594	24.4359	24.6763	24.8659	24.9954	24.5266	25.0684	24.4062	24.4974	24.806	24.3091	24.281	24.3603	24.0442	24.2219	24.4248	24.2645	24.4786	24.2743	24.2713	24.1784	24.0671	24.3694	24.4278	23.8956	24.5861	23.5829	24.2827	23.9435	24.2482
Ttn_A2ASS6_T266_2	Ttn	A2ASS6	T266	2	25.6034	25.6833	25.2993	25.1792	25.0357	25.2057	25.2344	25.3659	25.3855	25.4072	25.4241	25.4778	25.4676	25.0373	24.8091	24.9436	25.2933	25.3717	25.2212	25.1535	25.236	25.1138	25.2533	25.1958	24.976	25.1631	25.068	25.0442	25.1847	25.3569	24.8773	25.3737	25.5418	25.2448	24.8481	25.053	24.9757	24.8707	25.269	25.3707	25.7074	25.4756	25.5411	25.5464	25.0805
Ttn_A2ASS6_S264_2	Ttn	A2ASS6	S264	2	24.4124	24.5955	24.401	24.2105	24.4592	24.6214	24.7673	24.8199	24.3963	24.4045	24.4035	24.4098	24.5168	24.3472	24.4148	24.5793	24.7628	24.7615	24.3218	24.2978	24.3462	24.2553	24.1801	24.493	24.5784	24.616	24.4065	24.5615	24.3181	24.2068	24.1334	24.2079	24.4911	24.6453	24.3177	24.4293	24.5166	24.2721	24.285	24.3136	24.5155	24.1704	24.6559	24.6904	24.4059
Ttn_A2ASS6_S269_2	Ttn	A2ASS6	S269	2	15.3837	15.8655	16.8397	15.6065	15.84	15.8877	16.0616	16.6523	15.6644	15.249	15.5962	14.9743	16.2074	15.4086	16.0035	15.8059	15.7807	16.8712	14.5421	15.6988	15.6393	16.4364	15.5136	14.922	15.3075	15.5693	15.9106	14.8453	14.2185	14.5961	14.8536	16.278	15.1203	14.7695	15.9701	16.4873	15.8994	16.1704	16.7715	16.0317	16.7394	14.685	16.9448	16.3077	16.4764
Ttn_A2ASS6_S34451_1	Ttn	A2ASS6	S34451	1	25.2561	25.3217	24.9842	24.9404	25.1455	25.2147	25.229	25.3308	25.1755	25.5049	25.3119	25.3397	25.3814	25.1898	25.2786	25.1719	25.3946	25.4031	25.416	25.1957	25.1787	25.5584	25.3733	25.4294	25.3931	25.3755	25.6374	25.3744	25.3356	25.7599	25.1653	25.26	25.3107	25.5273	25.0347	25.2052	25.2609	25.4053	24.4581	24.6771	24.8906	24.4692	24.9079	24.6786	24.575
Ttn_A2ASS6_S34464_1	Ttn	A2ASS6	S34464	1	25.3658	21.9373	25.0113	22.0422	25.1443	22.4101	22.5515	25.2451	25.0942	25.2685	22.8026	25.2735	25.3201	25.1609	25.0837	25.1532	25.3751	25.612	25.344	20.3369	22.1079	25.2604	25.3435	25.2798	25.3296	20.9672	23.5882	23.4931	25.1707	25.8435	25.4473	25.6432	25.187	21.6984	25.3998	25.5373	25.1675	25.4824	20.9536	24.6364	24.8115	24.4457	21.642	24.6667	24.5856
Ttn_A2ASS6_T34467_1	Ttn	A2ASS6	T34467	1	NA	14.4724	NA	NA	NA	NA	NA	NA	NA	NA	15.174	NA	NA	15.1176	19.2834	NA	17.9042	NA	NA	NA	13.4256	NA	NA	NA	NA	NA	NA	15.5585	NA	NA	NA	19.2181	NA	NA	NA	NA	14.777	NA	NA	12.6092	NA	14.0615	NA	NA	NA
Ttn_A2ASS6_S34457_1	Ttn	A2ASS6	S34457	1	25.3229	25.3058	24.9806	24.8049	25.0666	25.1939	24.9985	25.0494	24.9078	24.9913	24.8515	25.068	24.9624	22.8545	22.3171	24.8298	22.8534	25.2277	25.1641	25.3559	25.3118	25.1907	25.3225	25.2283	24.5121	25.4856	25.2771	25.5208	24.8997	25.8876	23.8175	25.7293	25.0521	25.163	24.9351	24.2489	25.007	25.0865	24.301	24.5969	24.8389	24.4487	24.8155	24.6026	24.4544
Ttn_A2ASS6_T5415_1	Ttn	A2ASS6	T5415	1	14.4548	14.7502	14.7509	14.4327	14.4121	14.9094	14.9167	14.3327	14.4632	15.0552	14.4014	14.4486	14.1325	14.6756	14.3135	14.566	14.7854	14.4485	14.4297	14.5107	14.6017	14.3275	14.6512	14.9175	14.4299	14.6579	14.3869	14.2759	14.4872	15.0974	14.3939	14.1249	14.626	14.7712	13.8385	14.3915	14.4671	14.6169	14.0176	14.5422	15.1579	14.648	14.6301	14.797	14.9677
Ttn_A2ASS6_S307_4	Ttn	A2ASS6	S307	4	24.5753	24.7075	24.5453	24.3889	24.2928	24.6044	24.4936	24.4887	24.5776	24.3932	23.9797	24.2852	24.3153	24.3026	24.3304	24.1082	24.3962	24.2307	24.4148	24.3362	24.339	24.4878	23.9304	24.22	24.1898	24.2834	24.2664	24.2691	23.9265	24.0457	24.2346	24.1153	24.2805	24.0066	24.1477	23.9413	23.9138	23.9868	24.4481	24.1585	24.4694	24.0336	24.3842	24.1129	24.1414
Ttn_A2ASS6_S305_4	Ttn	A2ASS6	S305	4	24.6342	24.756	24.616	24.3772	24.3498	24.6479	24.5528	24.4844	24.5303	24.451	24.0423	24.342	24.3642	24.24	24.377	24.1647	24.4408	24.3325	24.4455	24.3866	24.3765	24.4244	23.9857	24.2792	24.2277	24.3274	24.221	24.279	23.9882	24.0661	24.2728	24.188	24.3376	24.0535	24.1968	24.0081	23.9601	24.025	24.4384	24.1512	24.4	24.0773	24.4339	24.1824	24.0583
Ttn_A2ASS6_S301_4	Ttn	A2ASS6	S301	4	24.5846	24.6982	24.5556	24.3176	24.289	24.5929	24.4876	24.4114	24.5694	24.4158	24.0046	24.3073	24.3374	24.2787	24.3454	24.1268	24.4241	24.2421	24.3988	24.3405	24.3202	24.4685	23.9651	24.2558	24.2031	24.2612	24.2221	24.2612	23.9583	24.04	24.2539	24.1655	24.3132	24.0376	24.1769	23.9825	23.9297	24.0036	24.3747	24.0582	24.4433	24.0449	24.3411	24.082	24.1106
Ttn_A2ASS6_T299_4	Ttn	A2ASS6	T299	4	24.5615	24.6916	24.5422	24.3089	24.2906	24.5869	24.4901	24.4217	24.529	24.3771	23.9748	24.2685	24.3037	24.2426	24.3058	24.0976	24.3767	24.2403	24.3724	24.3137	24.3035	24.4127	23.901	24.2027	24.152	24.2607	24.2069	24.2119	23.922	23.9931	24.1985	24.1181	24.2731	23.9828	24.1326	23.9392	23.8934	23.968	24.3749	24.1236	24.3904	24.0071	24.3605	24.1164	24.0735
Ttn_A2ASS6_S281_1	Ttn	A2ASS6	S281	1	23.1816	23.2734	22.9198	22.4967	22.8471	23.0183	22.8675	22.8037	22.7755	22.8774	22.8276	23.2015	23.3197	22.6028	22.8748	22.9015	23.3062	23.1239	22.8512	22.8417	22.5745	22.6394	22.5344	22.753	22.9547	22.788	22.62	22.737	22.5576	23.1068	22.6873	23.0725	23.2049	22.74	22.6285	22.9857	23.2145	22.8264	22.9131	22.9868	23.0915	22.444	23.2352	22.732	22.5888
Ttn_A2ASS6_S283_1	Ttn	A2ASS6	S283	1	23.0562	22.9721	22.7349	22.6258	22.6313	22.7913	22.8328	22.8694	22.8109	22.9305	22.9042	23.0315	23.0245	22.666	22.8248	22.7727	23.021	22.9527	22.6432	22.5513	22.6957	22.8409	22.6517	22.7722	22.6513	22.7224	22.8879	22.8348	22.515	23.0186	22.673	22.6236	22.6378	22.7522	22.4038	22.4395	22.4645	22.8015	22.6051	22.5522	22.6941	22.377	22.8785	22.5816	22.3467
Ttn_A2ASS6_S283_2	Ttn	A2ASS6	S283	2	21.7714	22.2965	22.0697	21.7446	21.4849	22.1057	22.0587	21.9476	21.8883	21.8807	21.8332	21.9721	21.9417	21.7317	21.5749	21.8496	22.0356	21.4352	20.9611	21.2103	21.5269	21.5627	21.2955	21.4524	21.0797	21.5631	21.8095	21.6147	21.4124	21.6876	20.7973	21.5115	21.4542	21.6678	21.4033	21.3597	21.3681	21.6237	22.2825	22.2937	22.2946	22.0568	22.5549	22.3841	22.0709
Ttn_A2ASS6_S281_2	Ttn	A2ASS6	S281	2	22.701	21.7714	22.7936	22.3507	22.3453	22.5883	21.5543	22.4619	22.4758	22.418	22.2915	22.4353	22.307	22.2645	22.3271	22.2458	22.3626	22.4073	22.1844	22.2426	22.1019	22.5914	21.9967	22.2994	22.2611	22.2068	22.3441	22.2962	22.0993	22.241	21.9543	22.2424	22.1914	22.093	22.0471	21.9535	21.9588	22.0815	22.8562	22.8497	22.0423	22.6341	22.0751	23.0537	22.7535
Ttn_A2ASS6_S1424_5	Ttn	A2ASS6	S1424	5	24.8423	24.9351	24.84	24.5664	24.1141	24.6866	24.7037	24.5316	24.5312	24.4366	23.9662	24.6217	24.3584	24.0637	24.4731	23.9297	24.1587	24.1322	24.9074	24.9277	24.8666	24.9675	24.5345	24.6133	24.5615	24.4669	24.6385	24.7062	23.9588	24.206	24.7816	24.5416	24.6489	23.8428	24.4448	23.9922	24.0739	24.2492	24.7458	24.4916	25.0681	24.2686	24.9905	24.301	24.3295
Ttn_A2ASS6_S1420_5	Ttn	A2ASS6	S1420	5	24.8964	24.9217	24.8256	24.5256	24.1001	24.7013	24.7631	24.5312	24.5534	24.5	23.9525	24.5604	24.2635	24.1362	24.4374	23.8815	24.1442	24.1527	24.8135	24.8846	24.8447	24.9333	24.5468	24.6197	24.5701	24.4071	24.6479	24.7137	23.9461	24.1336	24.7098	24.5305	24.651	23.9007	24.3841	23.9194	24.0982	24.2059	24.8174	24.463	25.0481	24.3062	25.0219	24.3632	24.3514
Ttn_A2ASS6_S1415_5	Ttn	A2ASS6	S1415	5	24.7796	24.7945	24.6854	24.3568	24.026	24.6115	24.5903	24.4073	24.3535	24.4236	23.8722	24.4342	24.2119	24.0648	24.2279	23.7413	24.21	24.0961	24.7257	24.7491	24.7098	24.7621	24.4372	24.5293	24.4893	24.3035	24.5096	24.4283	23.7065	24.0814	24.622	24.4864	24.5807	24.0015	24.3697	23.8845	24.058	24.1694	24.7145	24.3655	24.9646	24.2339	24.9339	24.2896	24.2803
Ttn_A2ASS6_S1420_2	Ttn	A2ASS6	S1420	2	24.5004	24.5672	24.0356	23.9137	23.7791	24.2622	24.1811	23.992	23.9526	23.903	23.5124	24.0748	23.8105	23.7374	23.9573	23.5651	24.6268	23.7821	24.1792	24.1796	24.3998	24.3233	23.9894	24.1327	24.0537	24.0447	24.2273	24.235	23.3823	24.0054	24.2261	24.0687	23.9404	24.2545	24.2247	23.8588	23.8454	23.8006	24.0768	23.6125	24.1118	23.7048	24.0729	23.8296	23.61
Ttn_A2ASS6_S1415_2	Ttn	A2ASS6	S1415	2	24.5892	24.9494	24.5067	24.4213	24.3598	24.7898	24.8981	24.7598	24.435	24.4364	24.4255	24.7277	24.4544	24.3506	24.4393	24.4817	24.7233	24.4755	24.6513	24.5712	24.7409	24.6999	24.6183	24.8476	24.7755	24.8712	24.8178	24.5809	24.4153	24.6456	24.2225	24.6723	24.7238	24.6106	24.3519	24.4937	24.7497	24.4414	24.3431	24.5843	25.0504	24.7533	24.9877	25.133	24.736
Ttn_A2ASS6_S1424_2	Ttn	A2ASS6	S1424	2	24.7371	24.7045	24.3707	24.1598	23.9518	24.3791	24.3581	24.3152	24.1635	24.0918	23.7795	24.4756	24.1719	23.8501	24.2304	23.8171	24.0314	23.7214	24.3465	24.4147	24.5129	24.6161	24.0859	24.3012	24.101	24.3101	24.5116	24.4878	23.7463	24.2981	24.4449	24.2307	24.0263	24.1361	24.2563	23.8561	23.6897	24.2309	24.3657	24.2052	24.6714	24.0305	24.682	24.1775	23.9383
Ttn_A2ASS6_S1424_1	Ttn	A2ASS6	S1424	1	22.4735	22.4698	21.99	21.8737	22.3423	22.4113	22.2364	22.4235	22.113	22.3156	22.1805	22.3077	22.3391	22.212	22.3413	22.2502	22.6153	22.485	22.2721	22.3123	22.4812	22.5121	22.2737	22.5793	22.4957	22.5888	22.7213	22.6717	22.1802	22.8085	22.4022	22.5506	22.21	22.7133	22.471	22.6448	22.2903	22.6763	21.2043	21.3285	21.5318	21.1147	21.6676	21.5355	21.3784
[truncated: 27,521 more rows]
[truncated: 49 more columns]

## Sheet: 02_analysis
Columns identifying phosphopeptides					log2FCs																																				Insulin response values
[truncated: 28,810 more rows]
[truncated: 98 more columns]
