# Supplementary material for: The genetic and dietary landscape of the muscle insulin signalling network
Source: eLife. 2024 Feb 8;12:RP89212. doi: 10.7554/eLife.89212 (PMC10942587; doi:10.7554/eLife.89212)
Supplement: Supplementary file 2. — Insulin-regulated phosphosites from this study that were additionally regulated by exercise either in Needham et al., 2022 or Hoffman et al., 2015. [file elife-89212-supp2.xlsx]

## Sheet: insregGxE_exregNeedhamHoffman
Phosphosite details				Exercise regulation
PhosphositePlus Site Group ID	Gene	Uniprot	Phosphosite	Hoffman 2015	Needham 2022
450254	Eef2	P58252	T59	+	+
448040	Eef2	P58252	T57	+	+
470754	Mff	Q6PCP5	S131	+	+
470753	Mff	Q6PCP5	S129	+	+
453632	Larp1	Q6ZQ58	S498	+	+
455925	Tbc1d4	Q8BYJ6	S324	+	+
4762876	Svil	Q8K4L3	S300	+	+
448238	Gys1	Q9Z1E4	S645	+	+
480145	Tns1	E9Q0S6	S1054	+
3176152	Ulk1	O70405	S450	+
448064	Rps6ka3	P18654	S369	+
469782	Dnajc2	P54103	S47	+
486522	Pcbp1	P60335	S264	+
448094	Rps6	P62754	S240	+
448093	Rps6	P62754	S236	+
447594	Mapk1	P63085	Y185	+
453577	Patl1	Q3TC46	S179	+
447527	Eif4ebp1	Q60876	S64	+
482918	Pcbp2	Q61990	S268	+
4731870	Speg	Q62407	S542	+
14570198	Atg9a	Q68FE2	S675	+
455922	Tbc1d4	Q8BYJ6	S348	+
471364	Lpin1	Q91ZP3	S923	+
448239	Gys1	Q9Z1E4	S649	+
4693547	Ttn	A2ASS6	S322		+
480195	Usp24	B1AY13	S1296		+
10782556	Usp24	B1AY13	S1282		+
483808	Akap13	E9Q394	S2692		+
3208338	Akap1	O08715	S103		+
3831732	Tom1	O88746	S376		+
2048085	Rab12	P35283	S20		+
447655	Map2k4	P47809	S78		+
4720237	Lmod2	Q3UHZ5	T391		+
450706	Hspb6	Q5EBG6	S16		+
4726016	Tom1l2	Q5SRX1	S394		+
4716961	Slc20a2	Q80UP8	S316		+
17544627	Lmod1	Q8BVA4	S511		+
11180047	Tbc1d4	Q8BYJ6	S604		+
455921	Tbc1d4	Q8BYJ6	T649		+
3195560	Golga4	Q91VW5	S41		+
485723	Plekhf2	Q91WB4	S226		+
4772204	Ehbp1l1	Q99MS7	S1460		+
470067	Akt1s1	Q9D1F4	T247		+
452430	Plec	Q9QXS1	S4620		+
451009	Ndrg2	Q9QYG0	T348		+
468257	Ndrg2	Q9QYG0	S338		+
468259	Ndrg2	Q9QYG0	S344		+
447886	Nos1	Q9Z0J4	S847		+
