# Supplementary material for: The genetic and dietary landscape of the muscle insulin signalling network
Source: eLife. 2024 Feb 8;12:RP89212. doi: 10.7554/eLife.89212 (PMC10942587; doi:10.7554/eLife.89212)
Supplement: Supplementary file 3. — Weighted gene correlation network analysis (WGCNA)-derived subnetworks of insulin-regulated phosphopeptides. [file elife-89212-supp3.xlsx]

## Sheet: WGCNA_clusts
phosphopeptide	cluster
Ubr4_A2AN08_T2712_2	unclustered
Skt_A2AQ25_S361_2	unclustered
Ttn_A2ASS6_S262_2	unclustered
Kansl3_A2RSY1_S515_2	unclustered
Kansl3_A2RSY1_S511_2	unclustered
Tns1_E9Q0S6_S616_1	unclustered
Bnip3_O55003_T66_2	unclustered
Lnx1_O70263_S242_1	unclustered
Atxn2_O70305_S585_1	unclustered
Pdlim1_O70400_S248_1	unclustered
Ulk1_O70405_S622_1	unclustered
Tom1_O88746_T164_2	unclustered
Map1b_P14873_S1255_4	unclustered
Map1b_P14873_S1251_4	unclustered
Insr_P15208_S1340_1	unclustered
Insr_P15208_S1337_2	unclustered
Zfp36l1_P23950_S92_1	unclustered
Irs1_P35569_S3_1	unclustered
Irs1_P35569_S369_1	unclustered
Irs1_P35569_T441_2	unclustered
Irs1_P35569_S343_1	unclustered
Irs1_P35569_T525_2	unclustered
Dnajc2_P54103_S47_1	unclustered
Eif4ebp2_P70445_T82_1	unclustered
Arvcf_P98203_S347_2	unclustered
Styxl2_Q148W8_S1034_2	unclustered
Styxl2_Q148W8_S322_1	unclustered
Dennd4b_Q3U1Y4_S964_2	unclustered
Dennd4b_Q3U1Y4_S961_2	unclustered
Ccser2_Q3UHI0_S700_2	unclustered
Abl2_Q4JIM5_S785_1	unclustered
Mypn_Q5DTJ9_S129_2	unclustered
Mypn_Q5DTJ9_S125_2	unclustered
Mypn_Q5DTJ9_S129_3	unclustered
Mypn_Q5DTJ9_S125_3	unclustered
Cluh_Q5SW19_S1300_1	unclustered
Tsc2_Q61037_S939_1	unclustered
Plpp1_Q61469_S273_1	unclustered
Pdcd4_Q61823_S457_1	unclustered
Speg_Q62407_S2135_1	unclustered
Ccpg1_Q640L3_T185_2	unclustered
Ccpg1_Q640L3_S187_2	unclustered
Ralgapa1_Q6GYP7_S772_1	unclustered
Pdcd11_Q6NS46_S1468_1	unclustered
Eif4g1_Q6NZJ6_S1081_1	unclustered
Abcf1_Q6P542_S107_2	unclustered
Abcf1_Q6P542_S103_2	unclustered
Mff_Q6PCP5_S129_1	unclustered
Ube2o_Q6ZPJ3_S1227_2	unclustered
Ube2o_Q6ZPJ3_S1223_2	unclustered
Znrf2_Q71FD5_S147_2	unclustered
Znrf2_Q71FD5_S141_2	unclustered
Znrf2_Q71FD5_S18_1	unclustered
Ppp6r1_Q7TSI3_S745_1	unclustered
Rragd_Q7TT45_T440_2	unclustered
Map3k11_Q80XI6_S35_2	unclustered
Map3k11_Q80XI6_T27_2	unclustered
Pank4_Q80YV4_T406_1	unclustered
Eif4b_Q8BGD9_S425_2	unclustered
Eif4b_Q8BGD9_S422_2	unclustered
Sgta_Q8BJU0_S307_1	unclustered
Tbc1d4_Q8BYJ6_S348_1	unclustered
Dnm3_Q8BZ98_S767_2	unclustered
Mepce_Q8K3A9_T188_2	unclustered
Ablim1_Q8K4G5_Y417_2	unclustered
Ablim1_Q8K4G5_S407_2	unclustered
Mapre2_Q8R001_S221_2	unclustered
Mapre2_Q8R001_S218_2	unclustered
Lgalsl_Q8VED9_S25_1	unclustered
Caskin2_Q8VHK1_S471_1	unclustered
Flnc_Q8VHX6_S2234_1	unclustered
Rab14_Q91V41_S204_1	unclustered
Prkag2_Q91WG5_S196_1	unclustered
Cic_Q924A2_S2311_1	unclustered
Alpk3_Q924C5_S1169_1	unclustered
Lamtor1_Q9CQ22_S56_1	unclustered
Akt1s1_Q9D1F4_T247_1	unclustered
Scn4a_Q9ER60_S525_2	unclustered
Scn4a_Q9ER60_S522_2	unclustered
Ranbp2_Q9ERU9_S781_2	unclustered
Ranbp2_Q9ERU9_T779_2	unclustered
Myot_Q9JIF9_S223_2	unclustered
Mtor_Q9JLN9_S2481_2	unclustered
Mtor_Q9JLN9_T2474_2	unclustered
Asap1_Q9QWY8_S1045_1	unclustered
Plec_Q9QXS1_S4633_1	unclustered
Plec_Q9QXS1_S3389_1	unclustered
Ndrg2_Q9QYG0_T348_2	unclustered
Ndrg2_Q9QYG0_S353_1	unclustered
Tfeb_Q9R210_S331_1	unclustered
Itsn2_Q9Z0R6_S843_2	unclustered
Neb_A0A571BF58_T49_2	I
Skt_A2AQ25_S353_1	I
Ttn_A2ASS6_S9459_1	I
Ttn_A2ASS6_T30094_1	I
Kif16b_B1AVY7_S662_1	I
Usp24_B1AY13_S2078_2	I
Usp24_B1AY13_S2077_2	I
Usp24_B1AY13_S2074_1	I
Lmo7_E9PYF4_S1516_1	I
Tns1_E9Q0S6_S1054_1	I
Acacb_E9Q4Z2_S81_1	I
Akap1_O08715_S103_2	I
Akap1_O08715_S101_2	I
Pitpnm1_O35954_S621_1	I
Wipf3_P0C7L0_S144_2	I
Wipf3_P0C7L0_S140_2	I
Dmd_P11531_S3617_1	I
Map1b_P14873_S1293_1	I
Map1b_P14873_S1151_1	I
Insr_P15208_S1340_2	I
Nefh_P19246_S859_1	I
Vim_P20152_S73_2	I
Vim_P20152_S72_2	I
Rab12_P35283_S20_2	I
Irs1_P35569_S1096_2	I
Map2k4_P47809_S78_1	I
Anks1a_P59672_S903_1	I
Hnrnpk_P61979_S379_1	I
Pfkfb2_P70265_S469_1	I
Styxl2_Q148W8_S1016_1	I
Gsk3a_Q2NL51_S21_1	I
Pi4k2a_Q2TBE6_S462_1	I
Patl1_Q3TC46_S184_2	I
Patl1_Q3TC46_S179_2	I
Pbxip1_Q3TVI8_S142_2	I
Dennd4b_Q3U1Y4_S961_1	I
Pdap1_Q3UHX2_S176_1	I
Pdap1_Q3UHX2_S178_1	I
Lmod2_Q3UHZ5_S407_1	I
Lmod2_Q3UHZ5_S399_2	I
Lmod2_Q3UHZ5_S395_2	I
Lmod2_Q3UHZ5_T391_2	I
Lmod2_Q3UHZ5_T391_1	I
Smcr8_Q3UMB5_S416_1	I
Cobll1_Q3UMF0_T304_2	I
Cobll1_Q3UMF0_S300_2	I
Wdr20_Q3UWE6_S434_1	I
Spag9_Q58A65_S705_1	I
Mypn_Q5DTJ9_S681_1	I
Mypn_Q5DTJ9_S1281_1	I
Hspb6_Q5EBG6_S23_2	I
Hspb6_Q5EBG6_S16_2	I
Prkaa1_Q5EG47_S496_1	I
Tom1l2_Q5SRX1_S394_1	I
Nfatc2_Q60591_S761_2	I
Nfatc2_Q60591_S759_2	I
Mast2_Q60592_S970_1	I
Sos1_Q62245_S1120_1	I
Speg_Q62407_S2415_2	I
Speg_Q62407_S2461_2	I
Speg_Q62407_T2498_2	I
Sorbs1_Q62417_S254_1	I
Larp4b_Q6A0A2_S500_1	I
Fkbp15_Q6P9Q6_S310_2	I
Fkbp15_Q6P9Q6_S306_2	I
Fkbp15_Q6P9Q6_S344_1	I
Mff_Q6PCP5_S131_1	I
Mff_Q6PCP5_S131_2	I
Mff_Q6PCP5_S129_2	I
Larp1_Q6ZQ58_S498_1	I
Cmya5_Q70KF4_S2249_1	I
Prrc2b_Q7TPM1_S415_1	I
Clasp1_Q80TV8_S778_1	I
Slc20a2_Q80UP8_S316_1	I
Eif4b_Q8BGD9_S422_1	I
Plin5_Q8BVZ1_S155_1	I
Synpo2l_Q8BWB1_S163_1	I
Tbc1d4_Q8BYJ6_S577_1	I
Tbc1d4_Q8BYJ6_T575_2	I
Tbc1d4_Q8BYJ6_S595_1	I
Tbc1d4_Q8BYJ6_S598_1	I
Tbcel_Q8C5W3_S41_2	I
Tbcel_Q8C5W3_T37_2	I
Ufl1_Q8CCJ3_S789_1	I
Prkd3_Q8K1Y2_S216_2	I
Prkd3_Q8K1Y2_S213_2	I
Agfg1_Q8K2K6_S181_2	I
Agfg1_Q8K2K6_T177_2	I
Mcam_Q8R2Y2_S608_1	I
Gramd1a_Q8VEF1_S257_2	I
Golga4_Q91VW5_S41_1	I
Ncoa5_Q91W39_S126_1	I
Plekhf2_Q91WB4_S226_1	I
Lpin1_Q91ZP3_S923_1	I
Dst_Q91ZU6_S7317_2	I
Dst_Q91ZU6_S7313_2	I
Ppp1r3a_Q99MR9_S44_2	I
Ppp1r3a_Q99MR9_S40_2	I
Ehbp1l1_Q99MS7_S1460_1	I
Klc4_Q9DBS5_S565_1	I
Bag3_Q9JLV1_T132_1	I
Jmy_Q9QXM1_S58_1	I
Plec_Q9QXS1_S3448_1	I
Plec_Q9QXS1_S4393_2	I
Plec_Q9QXS1_S4396_2	I
Plec_Q9QXS1_S4620_2	I
Plec_Q9QXS1_S4620_1	I
Plec_Q9QXS1_S4393_1	I
Ndrg2_Q9QYG0_S350_3	I
Ndrg2_Q9QYG0_T348_3	I
Ndrg2_Q9QYG0_S353_3	I
Ndrg2_Q9QYG0_S350_2	I
Ndrg2_Q9QYG0_S352_2	I
Ndrg2_Q9QYG0_S338_1	I
Ndrg2_Q9QYG0_S344_2	I
Pcm1_Q9R0L6_S380_2	I
Pcm1_Q9R0L6_S384_1	I
Tfeb_Q9R210_S108_2	I
Itsn1_Q9Z0R4_S315_1	I
Gys1_Q9Z1E4_S645_1	I
Obscn_A2AAJ9_S7760_2	II
Ahnak_E9Q616_S5555_2	II
Ahnak_E9Q616_S5553_2	II
Eef2k_O08796_S469_1	II
Nfatc1_O88942_S235_1	II
Nfatc1_O88942_S235_2	II
Nfatc1_O88942_S226_2	II
Irs1_P35569_S265_1	II
Irs1_P35569_S343_2	II
Lmna_P48678_S404_2	II
Hnrnpa1_P49312_S199_1	II
Dnajc2_P54103_S49_2	II
Dnajc2_P54103_S47_2	II
Eef2_P58252_T59_2	II
Eef2_P58252_T57_2	II
Eef2_P58252_T59_1	II
Mrtfb_P59759_S66_1	II
Rps6_P62754_S240_2	II
Rps6_P62754_S236_2	II
Nos3_P70313_S1176_1	II
Arvcf_P98203_S350_2	II
Limch1_Q3UH68_S192_1	II
Xirp2_Q4U4S6_S2860_2	II
Nfatc2_Q60591_S860_1	II
Nfatc2_Q60591_S150_2	II
Nfatc2_Q60591_S136_2	II
Pcbp2_Q61990_S268_1	II
Speg_Q62407_T2383_2	II
Speg_Q62407_S2379_2	II
Mcf2l_Q64096_S966_1	II
Hectd1_Q69ZR2_S1572_1	II
Tasor_Q69ZR9_T915_1	II
Pdcd11_Q6NS46_S1470_1	II
Larp1_Q6ZQ58_S743_2	II
Ubap2l_Q80X50_S629_2	II
Eif4g3_Q80XI3_T168_2	II
Eif4g3_Q80XI3_S164_2	II
Ablim2_Q8BL65_S477_1	II
Snx16_Q8C080_S51_1	II
Ablim1_Q8K4G5_S574_1	II
Svil_Q8K4L3_S300_2	II
Myh9_Q8VDD5_S1943_1	II
Synpo2_Q91YE8_S697_1	II
Pip4p2_Q9CZX7_Y28_1	II
Rnmt_Q9D0L8_S15_1	II
Akt1s1_Q9D1F4_S184_1	II
Tsc22d4_Q9EQN3_S271_1	II
Ndrg2_Q9QYG0_S353_2	II
Kiaa1522_A2A7S8_S959_2	III
Kiaa1522_A2A7S8_S952_2	III
Zbed5_B2RPU8_S45_2	III
Zbed5_B2RPU8_S41_2	III
Chchd2_Q9D1L0_S45_2	III
Chchd2_Q9D1L0_S41_2	III
CEFIP_D3Z1D3_S518_2	III
Rab11fip2_G3XA57_S277_1	III
Ank3_G5E8K5_T1803_1	III
Pnn_O35691_S100_2	III
Pnn_O35691_S96_2	III
Stx7_O70439_S126_2	III
Rps6ka3_P18654_S369_2	III
Rps6ka3_P18654_T365_2	III
Epb41_P48193_S678_1	III
Mapk1_P63085_Y185_1	III
Pfkfb2_P70265_S486_1	III
Irs2_P81122_S303_1	III
Mast2_Q60592_S149_1	III
Tsc2_Q61037_T1465_1	III
Tsc2_Q61037_S981_1	III
Plpp1_Q61469_S278_1	III
Speg_Q62407_S2462_2	III
Speg_Q62407_S2468_3	III
Speg_Q62407_S2462_3	III
Speg_Q62407_S2461_3	III
Ralgapa1_Q6GYP7_T742_1	III
Rragd_Q7TT45_T444_2	III
Slc20a2_Q80UP8_S385_1	III
Rhbdf2_Q80WQ6_S357_1	III
Atg2b_Q80XK6_S885_1	III
Tbc1d4_Q8BYJ6_S604_1	III
Dnm3_Q8BZ98_S763_2	III
Bcas3_Q8CCN5_S480_2	III
Mical3_Q8CJ19_S1307_1	III
Caskin2_Q8VHK1_S358_1	III
Lpin1_Q91ZP3_Y102_1	III
Bves_Q9ES83_S295_2	III
Bves_Q9ES83_S298_2	III
Gsk3b_Q9WV60_S9_1	III
Nos1_Q9Z0J4_S847_1	III
Gab2_Q9Z1S8_S211_1	III
Skt_A2AQ25_S474_2	IV
Skt_A2AQ25_T470_2	IV
Ttn_A2ASS6_S322_2	IV
Ttn_A2ASS6_S319_2	IV
Usp24_B1AY13_S2558_1	IV
Usp24_B1AY13_S1296_1	IV
Usp24_B1AY13_S1282_1	IV
Pdlim1_O70400_S118_1	IV
Ulk1_O70405_S479_2	IV
Ulk1_O70405_S477_2	IV
Ulk1_O70405_S450_1	IV
Irs1_P35569_S340_2	IV
Pcbp1_P60335_S264_1	IV
Ube2h_P62257_S5_2	IV
Ube2h_P62257_S3_2	IV
Rps6_P62754_S240_4	IV
Rps6_P62754_S236_4	IV
Rps6_P62754_S235_4	IV
Styxl2_Q148W8_S1029_2	IV
Styxl2_Q148W8_S429_2	IV
Patl1_Q3TC46_S179_1	IV
Hspb6_Q5EBG6_S23_1	IV
Smg7_Q5RJH6_S732_1	IV
Tbc1d9b_Q5SVR0_S997_1	IV
Nfatc2_Q60591_S136_1	IV
Nfatc2_Q60591_S107_1	IV
Speg_Q62407_S2461_1	IV
Atg9a_Q68FE2_S14_1	IV
Eif4g1_Q6NZJ6_S1211_1	IV
Erbin_Q80TH2_S1174_1	IV
Pum1_Q80U78_S124_1	IV
Prkaa2_Q8BRK8_S377_1	IV
Mknk2_Q8CDB0_S74_1	IV
Slain2_Q8CI08_S48_1	IV
Arhgef12_Q8R4H2_S341_1	IV
Lpin1_Q91ZP3_S356_1	IV
Errfi1_Q99JZ7_S274_2	IV
Errfi1_Q99JZ7_S272_2	IV
Psma5_Q9Z2U1_S16_1	IV
Rrn3_B2RS91_S42_1	V
Kank1_E9Q238_S325_1	V
Ap3d1_O54774_S825_1	V
Ulk1_O70405_S555_1	V
Ulk1_O70405_S637_1	V
Des_P31001_S32_1	V
Irs1_P35569_S522_2	V
Cast_P51125_S518_1	V
Naca_P70670_S1177_2	V
Naca_P70670_S1174_2	V
Naca_P70670_T794_2	V
Naca_P70670_S790_2	V
Gtf2f1_Q3THK3_S433_1	V
Dop1b_Q3UHQ6_S1167_1	V
Rcsd1_Q3UZA1_S177_1	V
Mtus1_Q5HZI1_S1208_1	V
Nfatc2_Q60591_S223_2	V
Nfatc2_Q60591_S238_2	V
Nfatc2_Q60591_S227_2	V
Ptpn21_Q62136_S777_1	V
Speg_Q62407_S375_2	V
Speg_Q62407_T379_2	V
Mreg_Q6NVG5_S213_1	V
Synm_Q70IV5_S1502_1	V
Ppp6r1_Q7TSI3_S745_2	V
Ppp6r1_Q7TSI3_S739_2	V
Zc3hc1_Q80YV2_S406_1	V
Tbc1d4_Q8BYJ6_T649_1	V
Tbcel_Q8C5W3_T37_1	V
Edc3_Q8K2D3_S131_1	V
Slc38a4_Q8R1S9_S49_1	V
Ranbp3_Q9CT10_S58_1	V
Gab1_Q9QYY0_S266_1	V
Gys1_Q9Z1E4_S649_5	V
Gys1_Q9Z1E4_S645_5	V
Gys1_Q9Z1E4_S641_5	V
CEFIP_D3Z1D3_S673_1	VI
Akap13_E9Q394_S2692_1	VI
Trip12_G5E870_S1069_1	VI
Foxk1_P42128_T408_2	VI
Pcyt1a_P49586_S315_1	VI
Slc12a2_P55012_T210_2	VI
Slc12a2_P55012_T205_2	VI
Vamp3_P63024_S48_1	VI
Irs2_P81122_S604_1	VI
Aqp1_Q02013_S199_2	VI
Aqp1_Q02013_S196_2	VI
Nfatc2_Q60591_S245_2	VI
Akt2_Q60823_S478_2	VI
Speg_Q62407_T546_3	VI
Chd4_Q6PDQ2_S1530_1	VI
Mycbp2_Q7TPH6_S3550_1	VI
Slc20a2_Q80UP8_T346_1	VI
Pcyt1b_Q811Q9_S315_1	VI
Tbc1d4_Q8BYJ6_S324_1	VI
Plin1_Q8CGN5_S130_1	VI
Plin1_Q8CGN5_S460_1	VI
Plin1_Q8CGN5_S439_2	VI
Plin1_Q8CGN5_S433_2	VI
Plin1_Q8CGN5_S384_1	VI
Plin1_Q8CGN5_S410_1	VI
Flnc_Q8VHX6_S2237_2	VI
Flnc_Q8VHX6_S2234_2	VI
Acly_Q91V92_S455_1	VI
Mtor_Q9JLN9_S2478_2	VI
Tex264_E9Q137_T303_1	VII
Tom1_O88746_S376_1	VII
Nos3_P70313_T1174_2	VII
Cacna1s_Q02789_T1661_1	VII
Mtus1_Q5HZI1_S1206_2	VII
Tbc1d1_Q60949_S608_1	VII
Kif5b_Q61768_S945_1	VII
Speg_Q62407_S542_2	VII
Sorbs1_Q62417_S345_2	VII
Sorbs1_Q62417_S341_2	VII
Atg9a_Q68FE2_S675_1	VII
Best3_Q6H1V1_S400_1	VII
Zfyve1_Q810J8_S129_1	VII
Lmod1_Q8BVA4_S511_3	VII
Lmod1_Q8BVA4_S507_3	VII
Lmod1_Q8BVA4_S503_3	VII
Rptor_Q8K4Q0_S863_1	VII
Zdhhc5_Q8VDZ4_S398_1	VII
Tacc2_Q9JJG0_T743_1	VII
Afdn_Q9QZQ1_S1795_1	VII
Pi4ka_E9Q3L2_S233_1	VIII
Zc3h13_E9Q784_S110_1	VIII
Nfatc1_O88942_S235_3	VIII
Irs1_P35569_T448_2	VIII
Myl2_P51667_S113_1	VIII
Eef2_P58252_T57_1	VIII
Ube2h_P62257_S3_1	VIII
Irs2_P81122_S388_2	VIII
Irs2_P81122_S385_2	VIII
Eif4ebp1_Q60876_T69_2	VIII
Eif4ebp1_Q60876_S64_2	VIII
Eif4ebp1_Q60876_S64_1	VIII
Speg_Q62407_S2361_2	VIII
Speg_Q62407_S2359_2	VIII
Eif4b_Q8BGD9_S424_2	VIII
Palmd_Q9JHU2_T270_1	VIII
