# Supplementary material for: The genetic and dietary landscape of the muscle insulin signalling network
Source: eLife. 2024 Feb 8;12:RP89212. doi: 10.7554/eLife.89212 (PMC10942587; doi:10.7554/eLife.89212)
Supplement: Supplementary file 4. — Pearson’s correlation of kinase substrate enrichment analysis (KSEA) enrichment scores with insulin-stimulated glucose uptake for all kinases with Strain or Diet effects. Correlation was performed on all values or on the medians of each strain-diet combination. [file elife-89212-supp4.xlsx]

## Sheet: KSEA_GUcorr
	Correlating all values		Correlating Strain-Diet medians
Kinase	r	p	r	p
SGK	0.0262826	0.857734	-0.114514	0.75276
Aur	0.181856	0.221177	0.446186	0.196168
p90RSK	0.0426372	0.771137	0.39262	0.261741
aPKC	0.0208579	0.886881	0.0592698	0.870802
GSK3	-0.0234964	0.872684	0.20094	0.577766
CDK5	0.092356	0.52794	0.136554	0.706796
P38	0.186315	0.199915	0.202333	0.575075
CDK1	0.134655	0.356287	0.24597	0.493328
CK2	0.0621529	0.671384	-0.206449	0.567153
